# Supplementary material for: Design, eco-friendly synthesis, molecular modeling and anticancer evaluation of thiazol-5(4H)-ones as potential tubulin polymerization inhibitors targeting the colchicine binding site
Source: PubMed Central journal article supplement (PMC9048505; doi:10.1039/c9ra10094f), 2020-01-15

**Design, Eco-friendly synthesis, molecular modeling, and anticancer evaluation of thiazol-5(4*H*)-ones as potential tubulin polymerization inhibitors targeting colchicine binding site**

Abeer M. El-Naggar\*<sup>a</sup>, Amira A. El-Sayed <sup>a</sup>, Amany Belal <sup>b</sup>, Ibrahim H. Eissa\*<sup>c</sup>

<sup>a</sup> Chemistry Department, Faculty of science, Ain shams University, Abbassiya, Cairo, 11566, Egypt

<sup>b</sup> Medicinal Chemistry Department , Faculty of Pharmacy, Beni-Suef University, Beni-Suef 62415, Egypt

<sup>c</sup> Pharmaceutical Medicinal Chemistry & Drug Design Department, Faculty of Pharmacy (Boys), Al-Azhar University, Cairo, 11884, Egypt

**\* Corresponding authors:**

**Ibrahim H. Eissa**

Pharmaceutical Medicinal Chemistry & Drug Design Department, Faculty of Pharmacy (Boys), Al-Azhar University, Cairo, 11884, Egypt

**Email:** [Ibrahimeissa@azhar.edu.eg](mailto:Ibrahimeissa@azhar.edu.eg)

**Abeer M. El-Naggar**

Chemistry Department, Faculty of science, Ain shams University, Abbassia, Cairo-11566, Egypt.

**E-mail:** [elsayedam@sci.asu.edu.eg](mailto:elsayedam@sci.asu.edu.eg)

# IR of compound (3a)

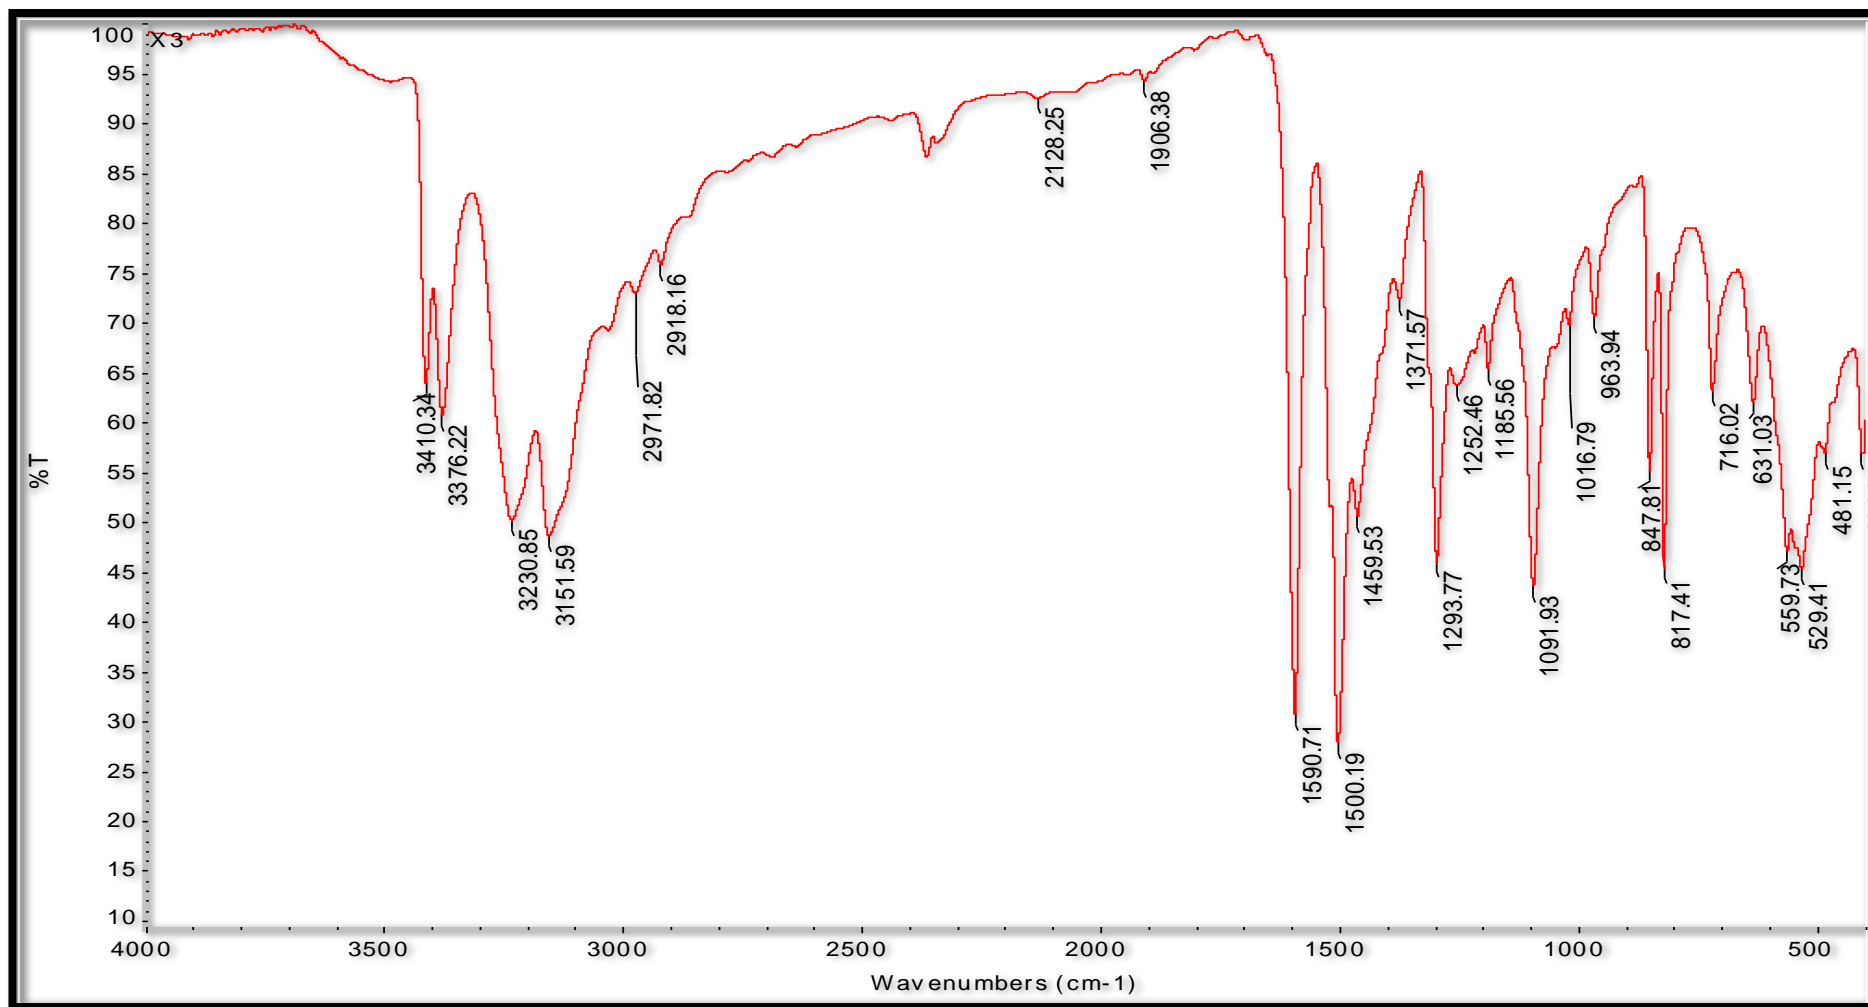

# <sup>1</sup>H NMR of compound (3a)

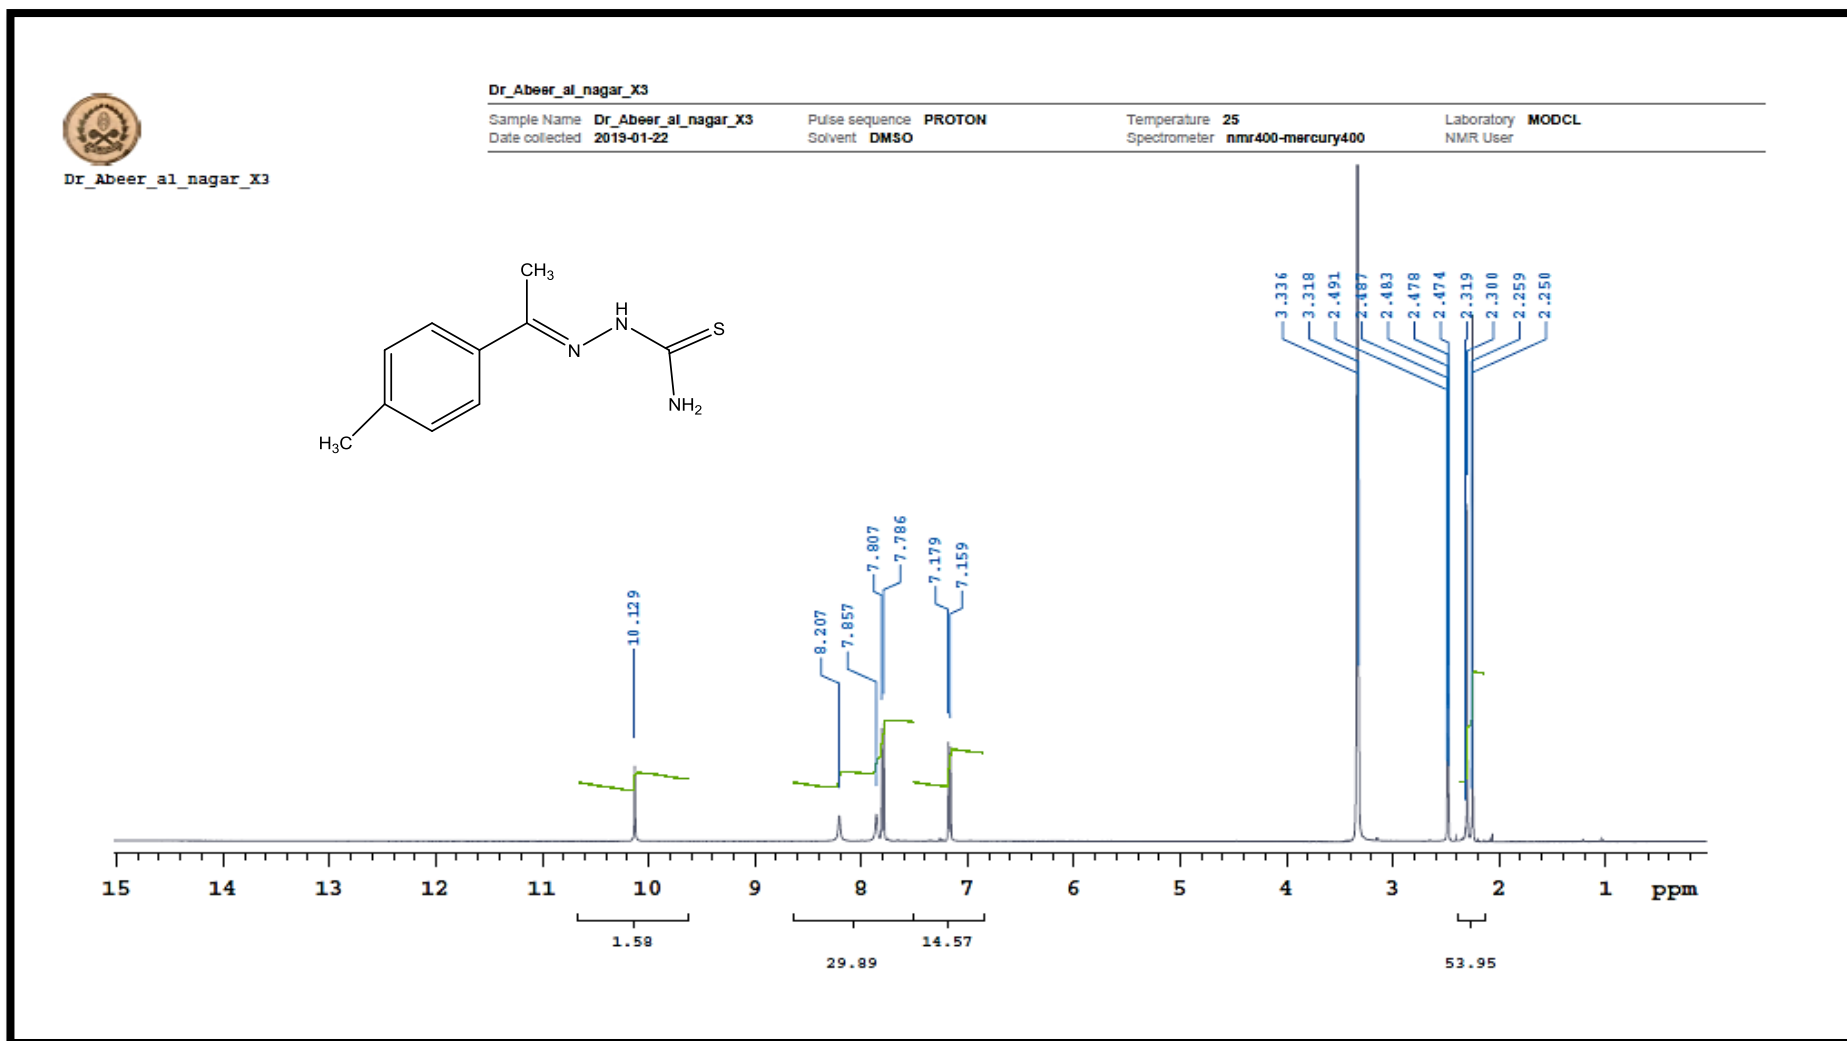

# D<sub>2</sub>O <sup>1</sup>H NMR of compound (3a)

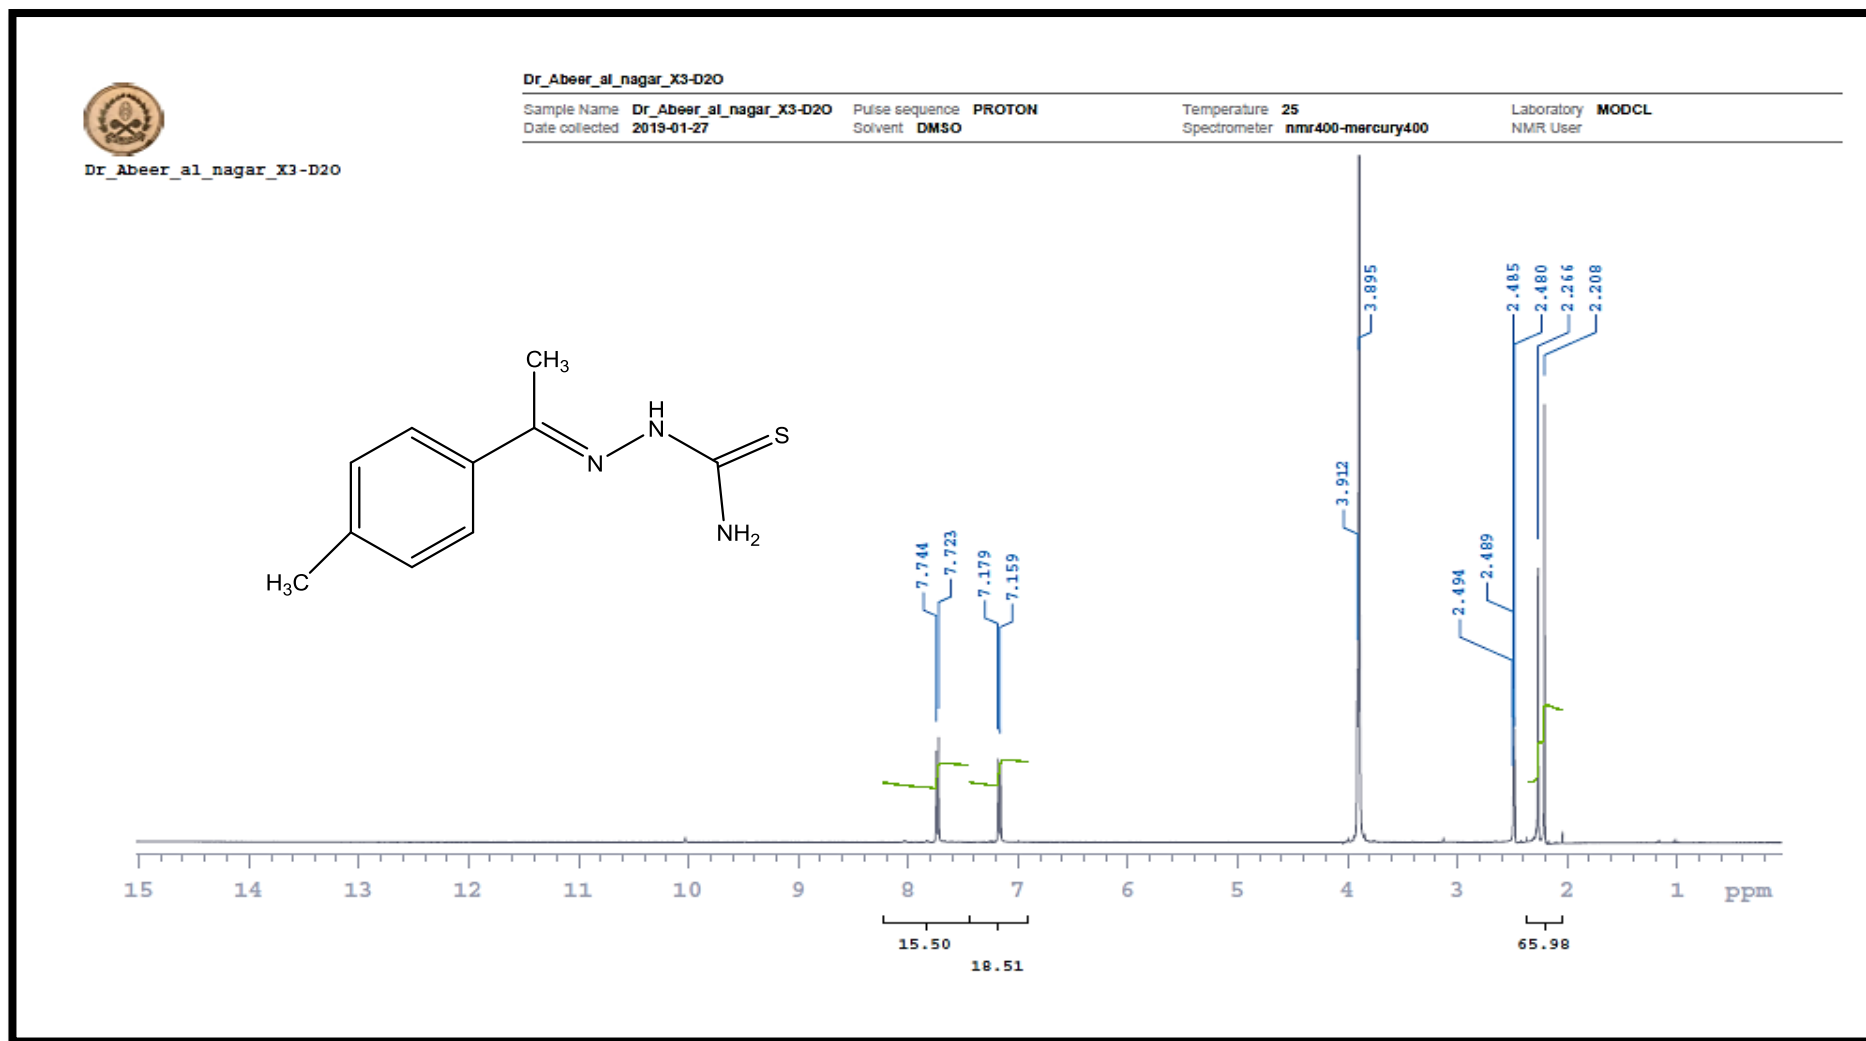

# IR of compound (3b)

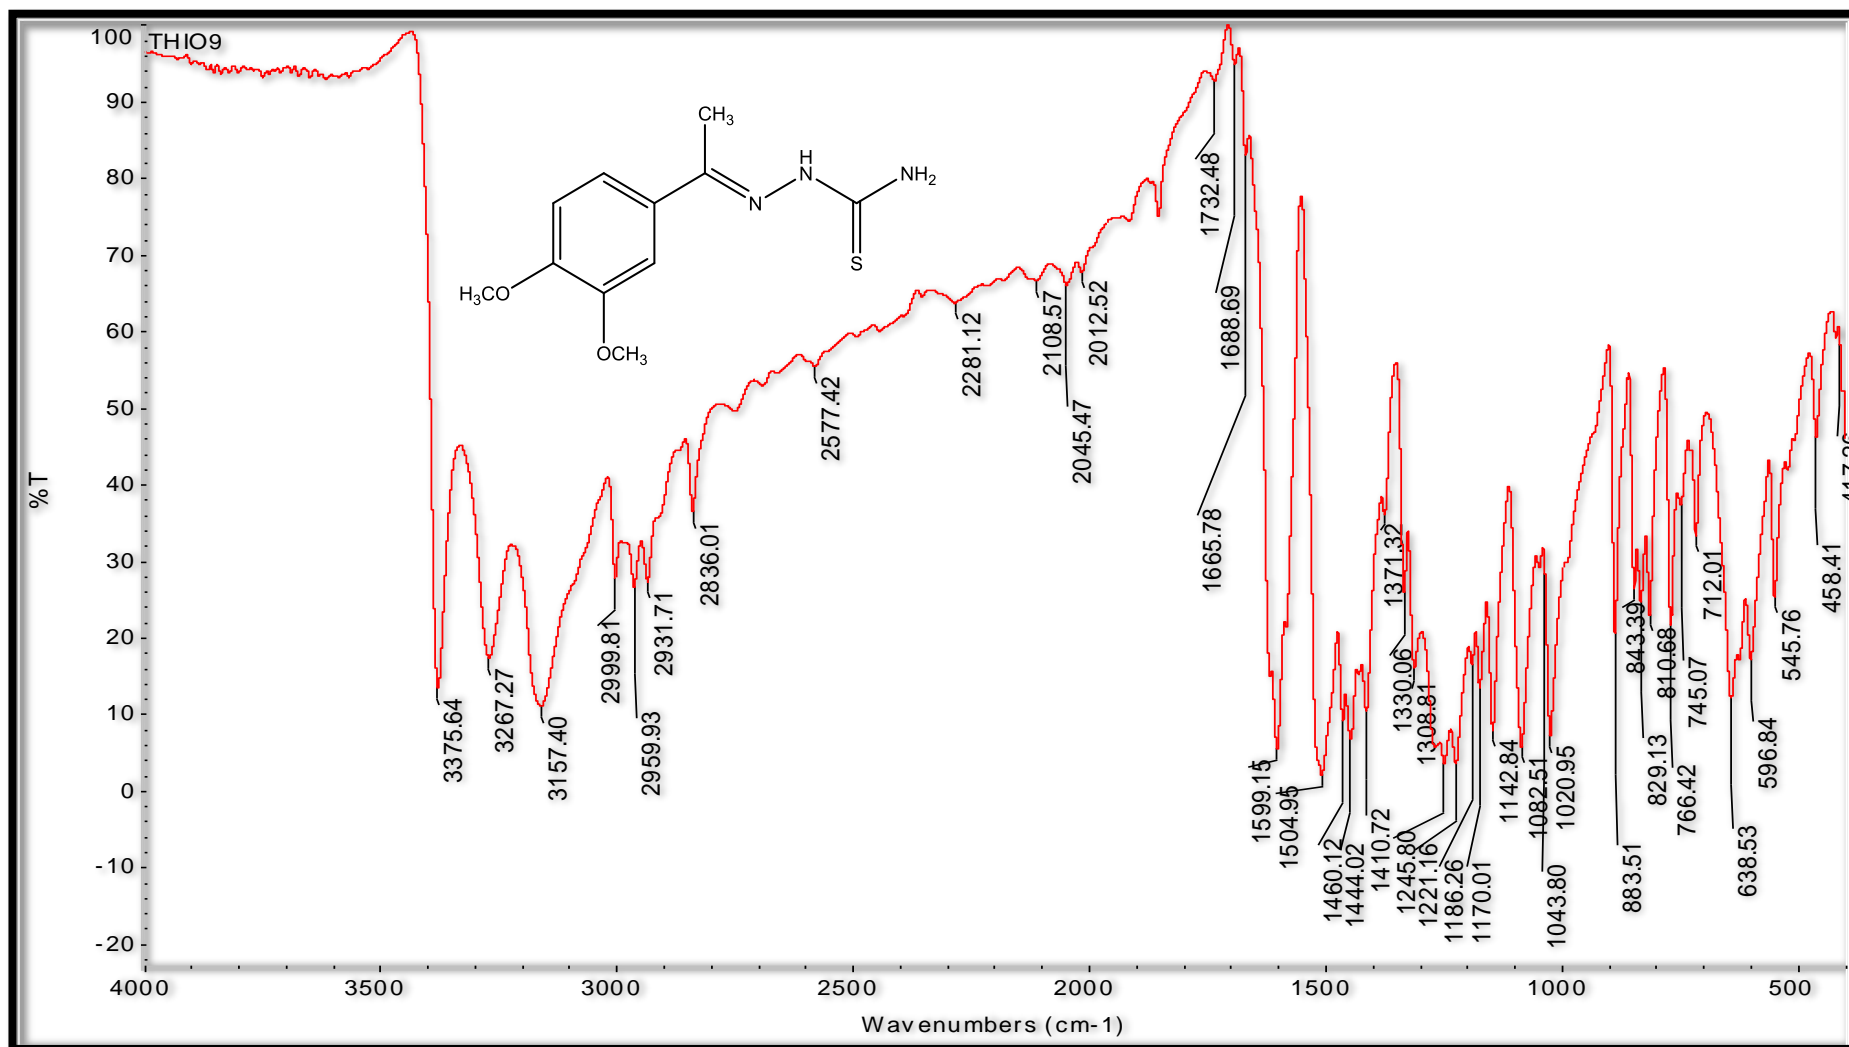

# <sup>1</sup>H NMR of compound (3b)

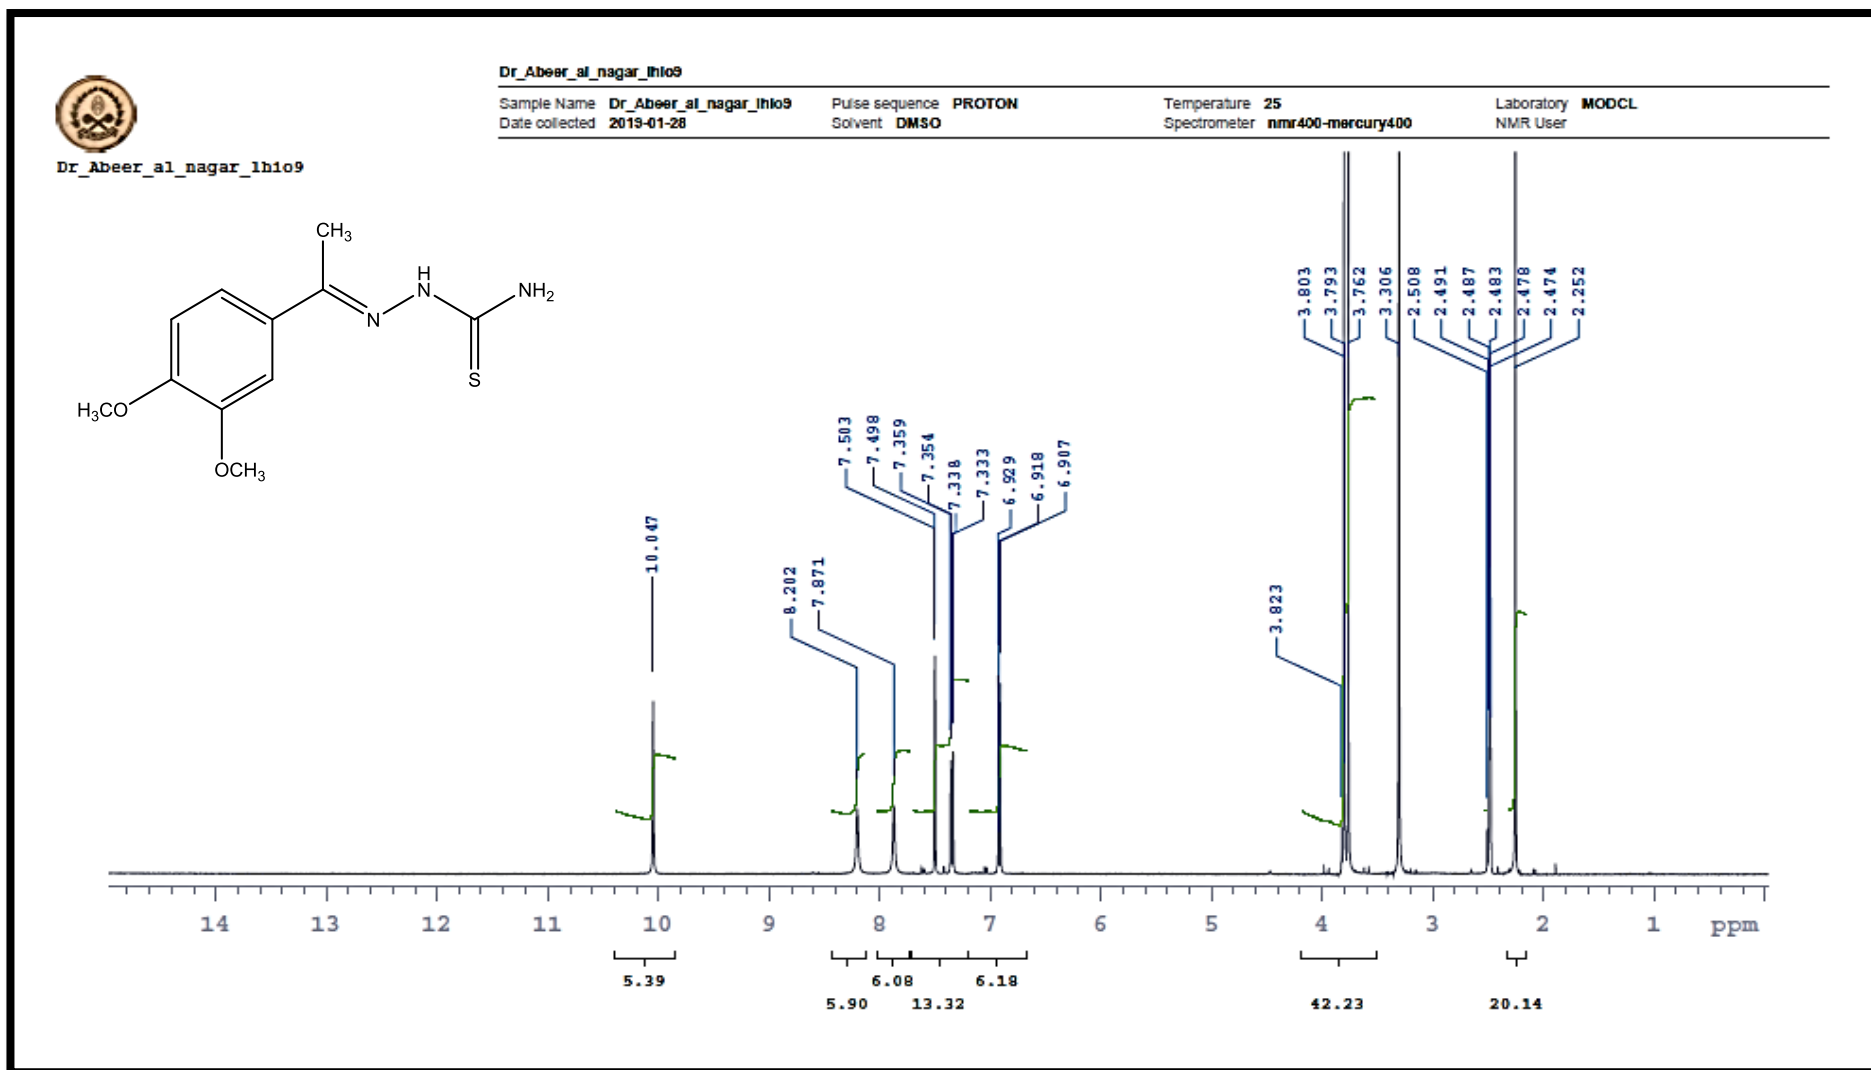

# <sup>13</sup>C NMR of compound (3b)

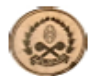

Dr\_Abeer\_al\_nagar\_1h1o9

Dr\_Abeer\_al\_nagar\_1h1o9

Sample Name Dr\_Abeer\_al\_nagar\_1h1o9

Pulse sequence CARBON

Temperature 25

Laboratory MODCL

Date collected 2019-01-28

Solvent DMSO

Spectrometer nmr400-mercury400

NMR User

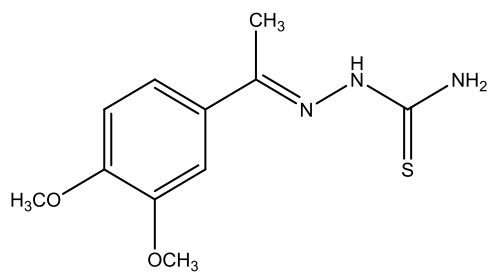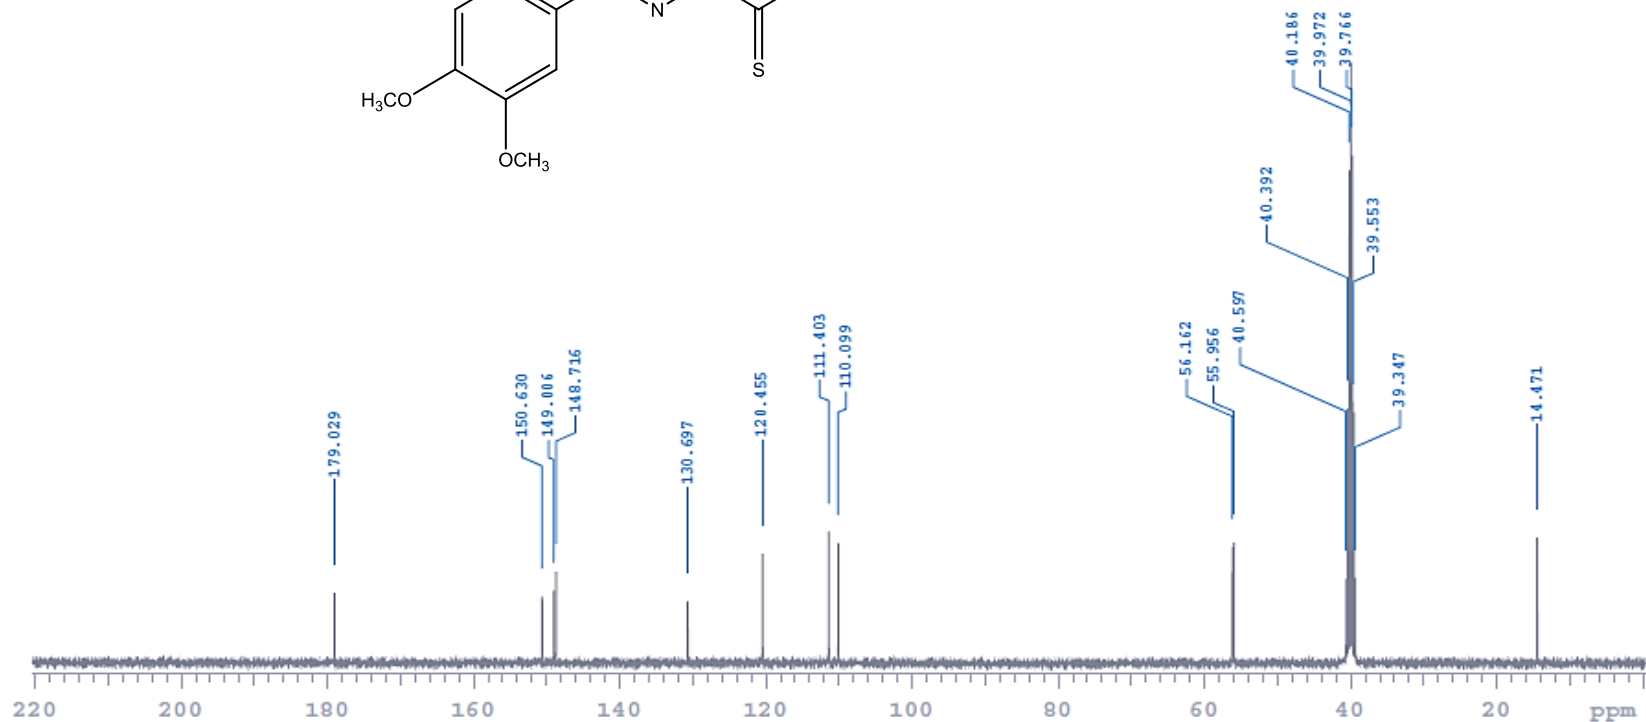

# IR of compound (7a)

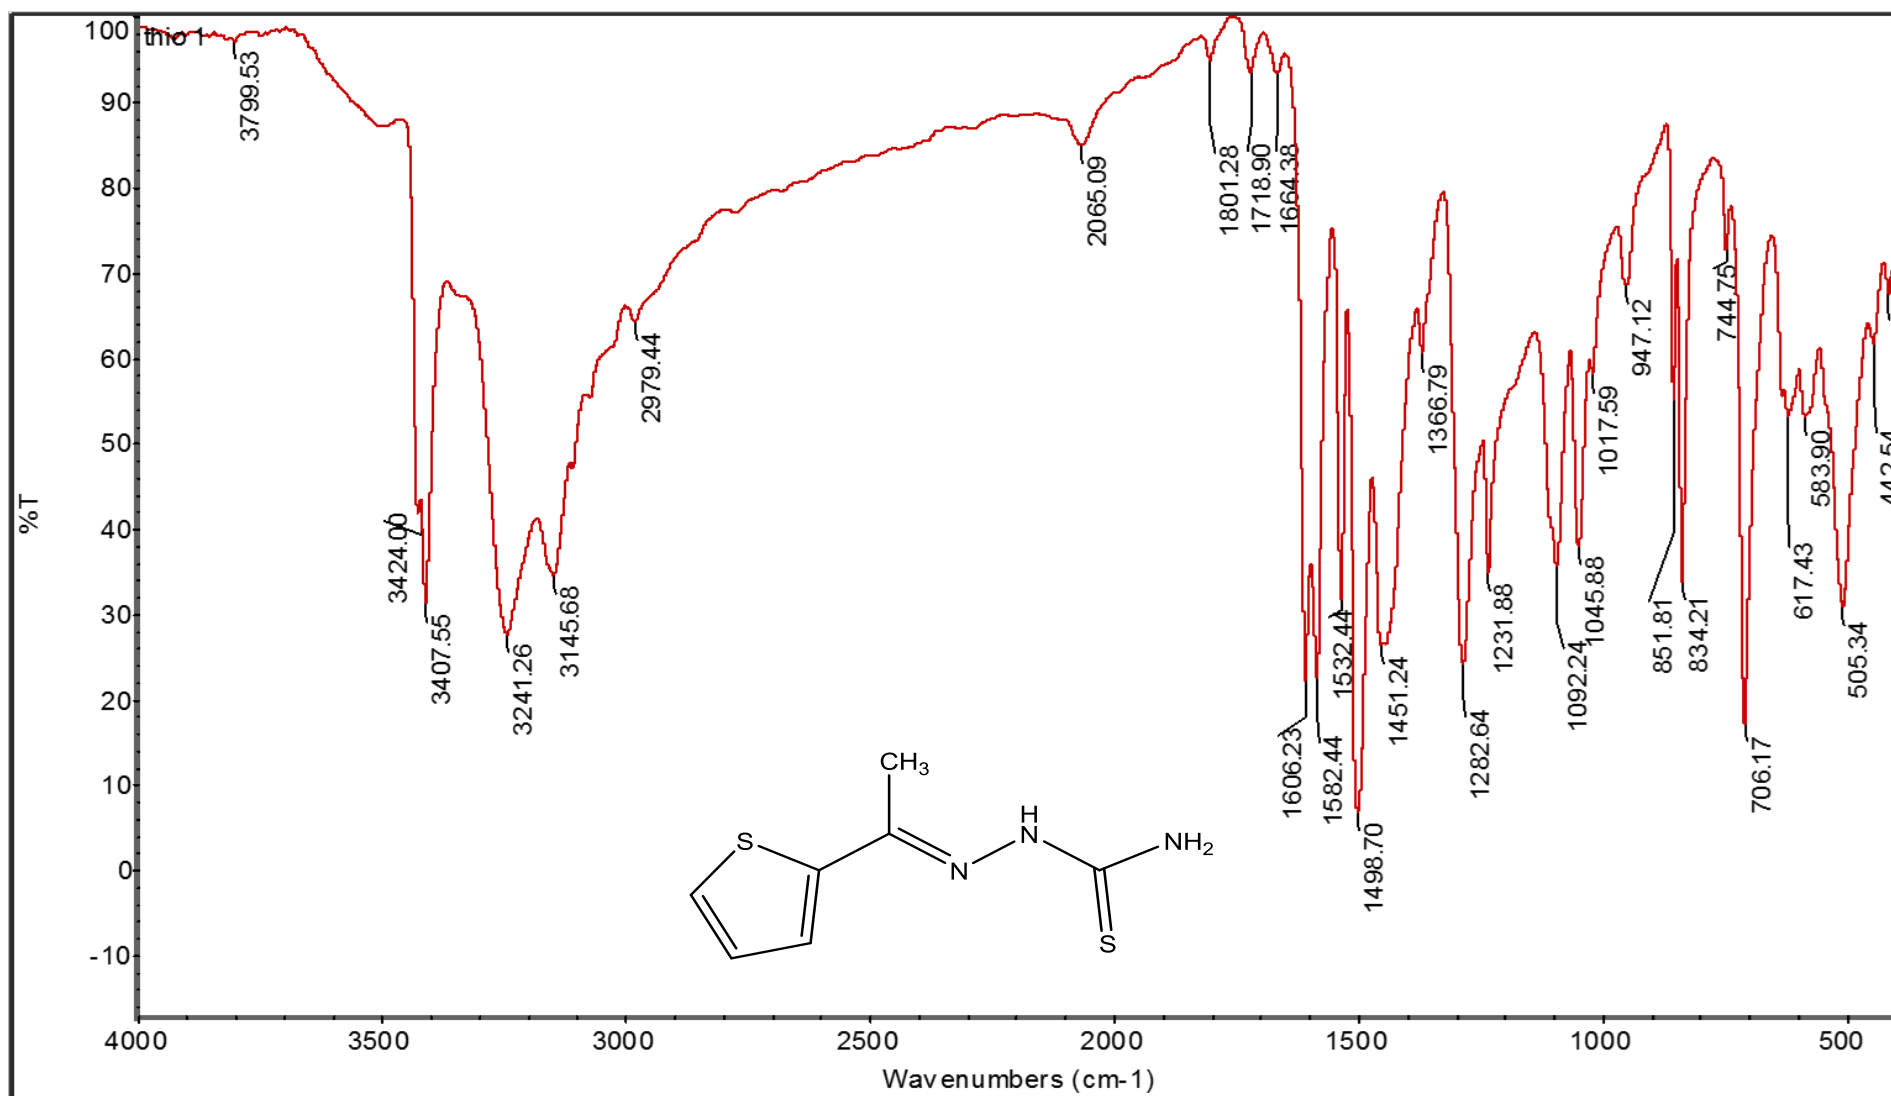



# <sup>1</sup>H NMR of compound (7a)

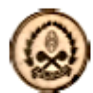

Dr\_AbeerElnagar-thio1

Dr\_AbeerElnagar-thio1

Sample Name Dr\_AbeerElnagar-thio1  
Date collected 2017-11-12

Pulse sequence PROTON  
Solvent cdcl3

Temperature 25  
Spectrometer nmr400-mercury400

Study owner vnmr1  
Operator vnmr1

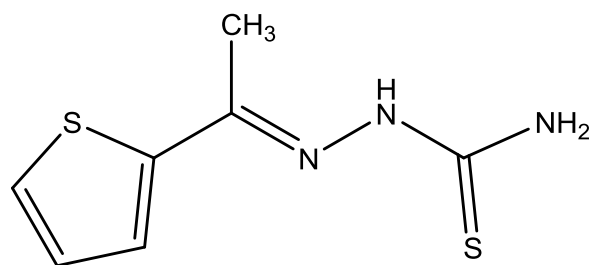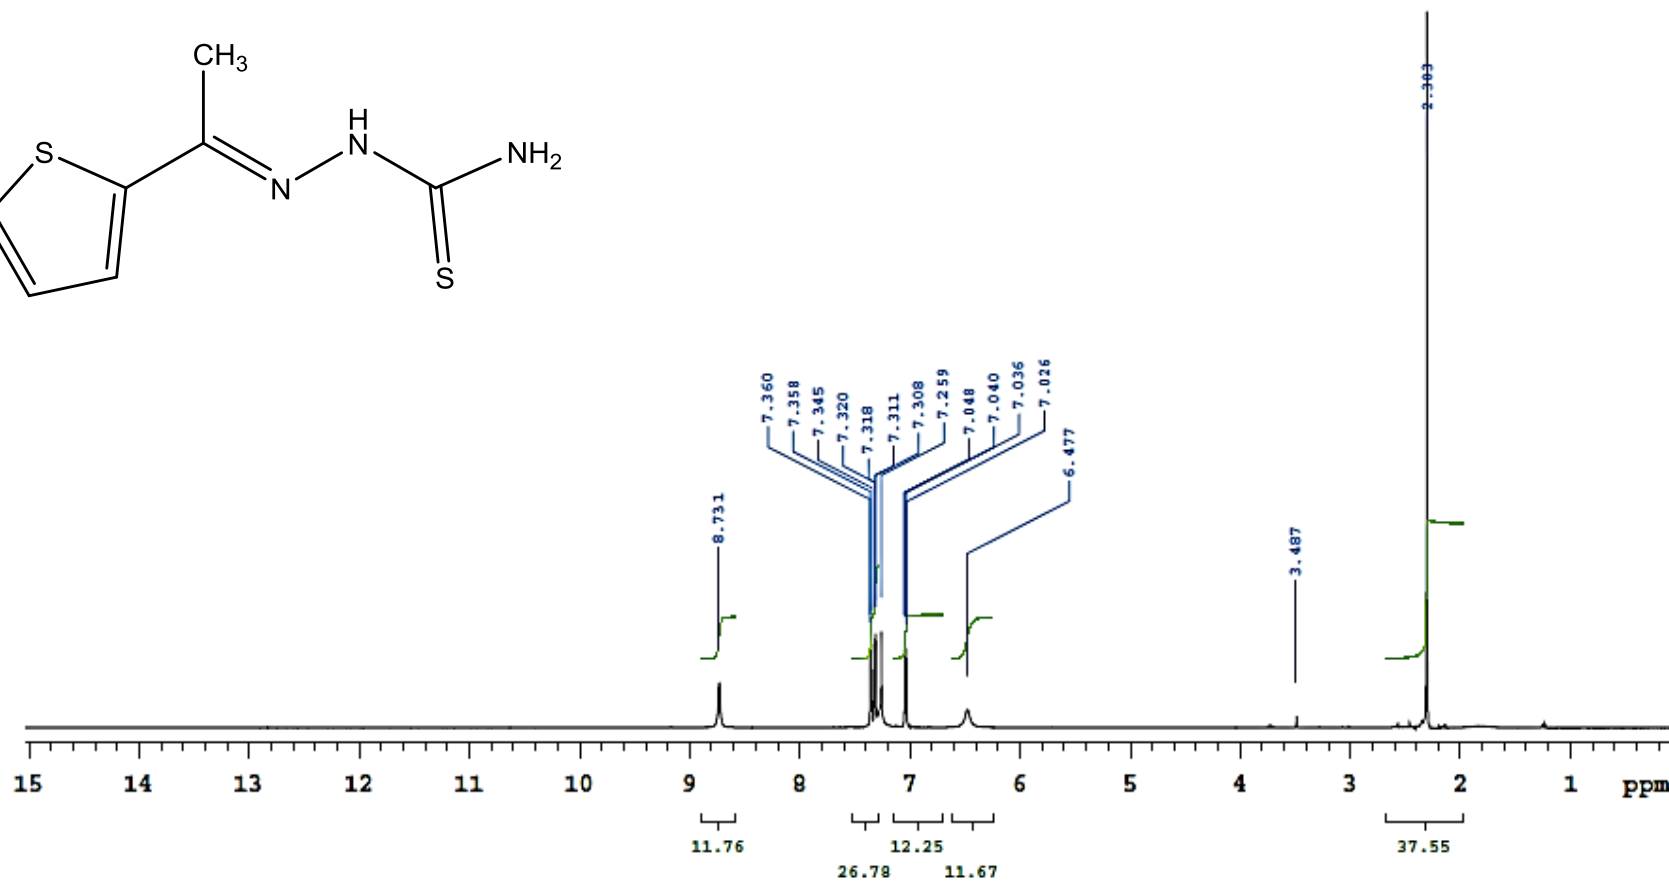

# D<sub>2</sub>O H NMR of compound (7a)

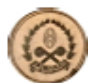

Dr\_AbeerElmagar-th1o1-D2O

Dr\_AbeerElmagar-th1o1-D2O

Sample Name Dr\_AbeerElmagar-th1o1-D2O  
Date collected 2017-11-13

Pulse sequence PROTON  
Solvent cdcl3

Temperature 25  
Spectrometer nmr400-mercury400

Study owner vnmr1  
Operator vnmr1

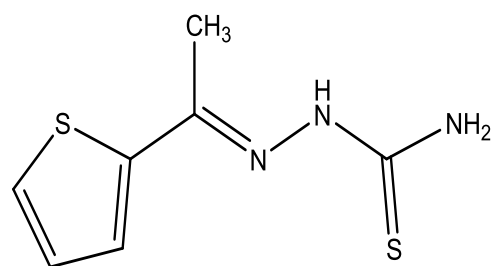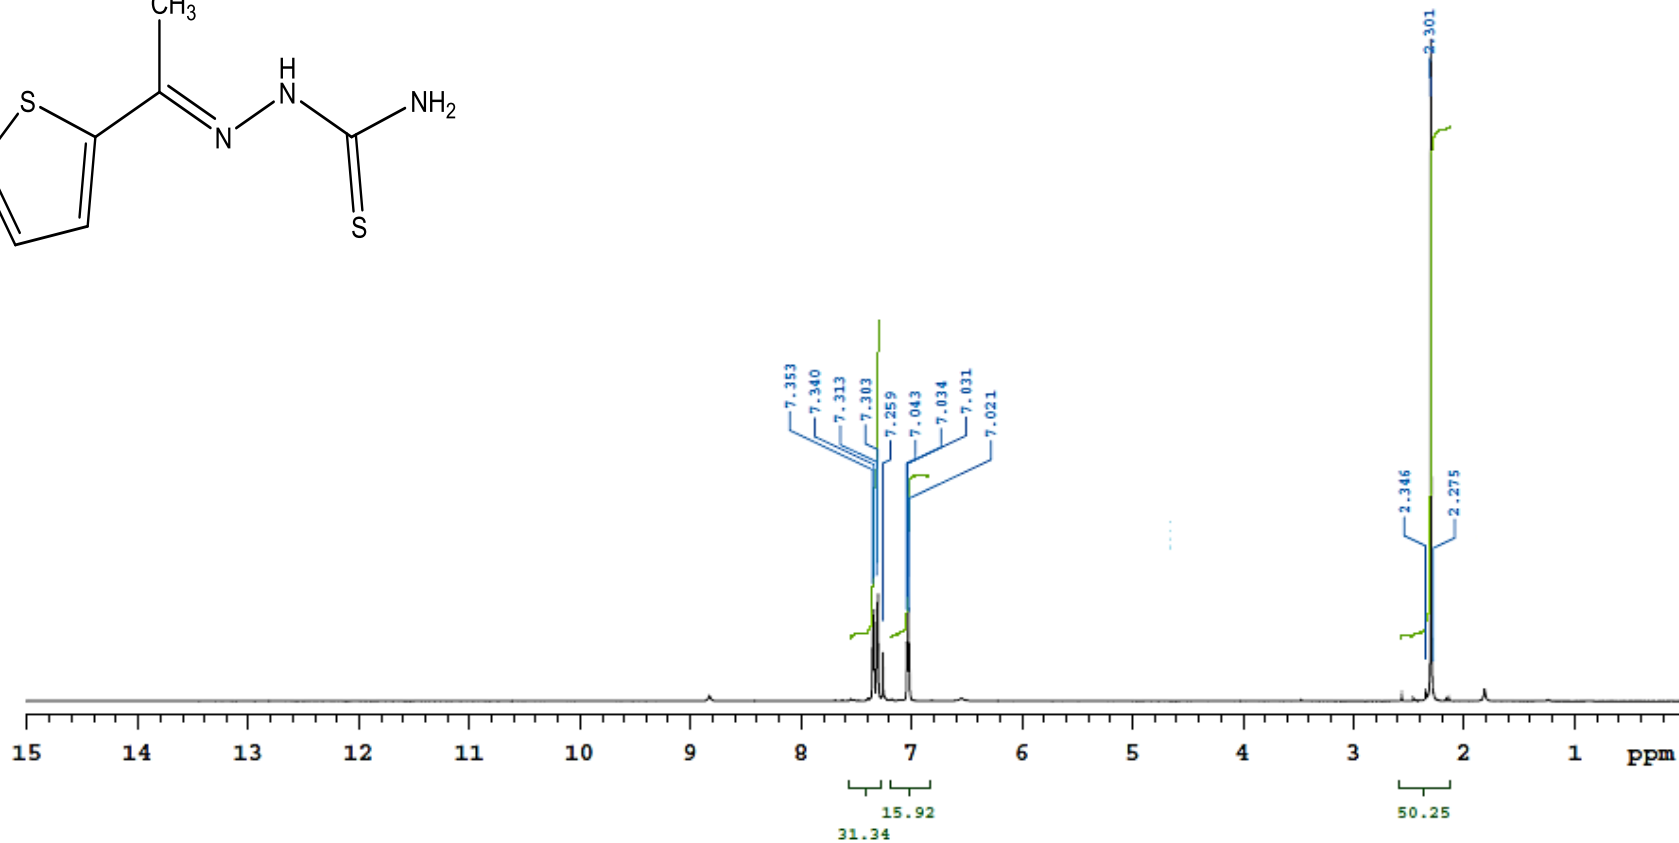

IR of compound (7b)

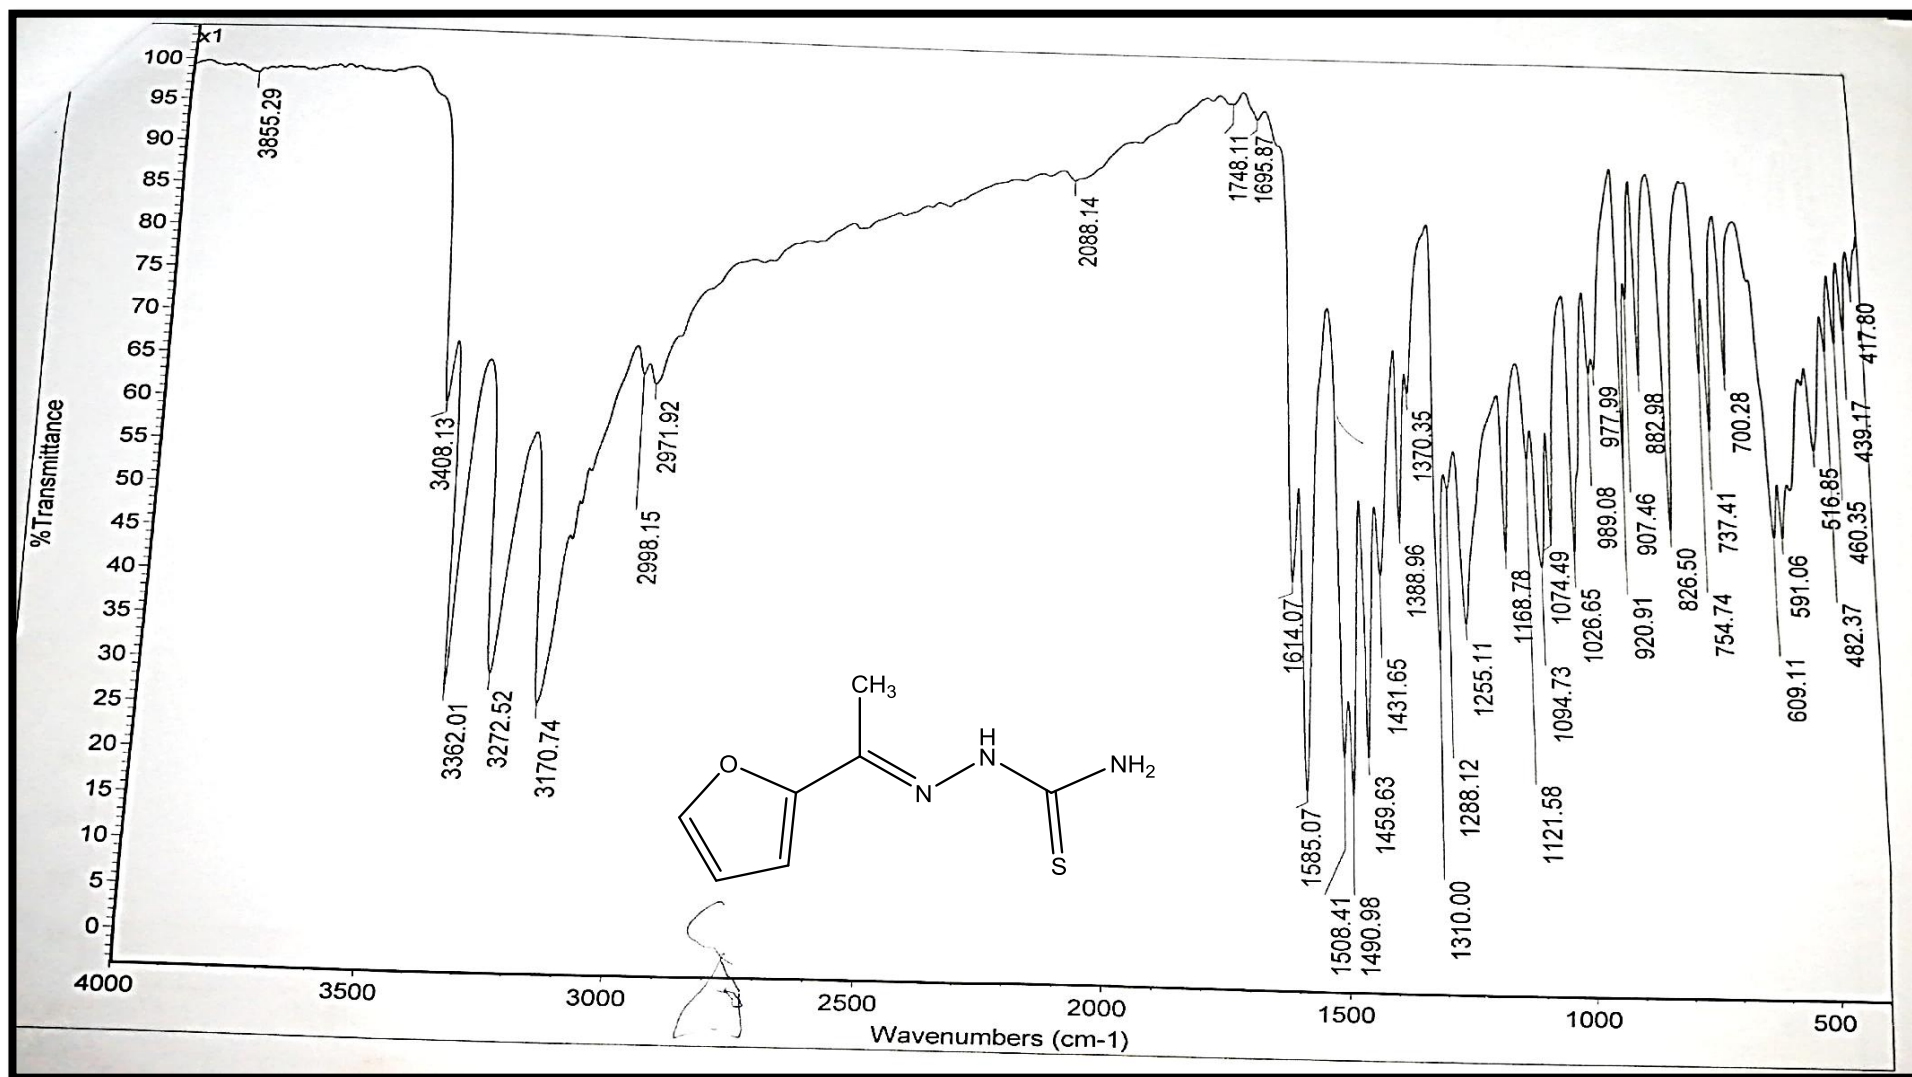

# <sup>1</sup>H NMR of compound (7b)

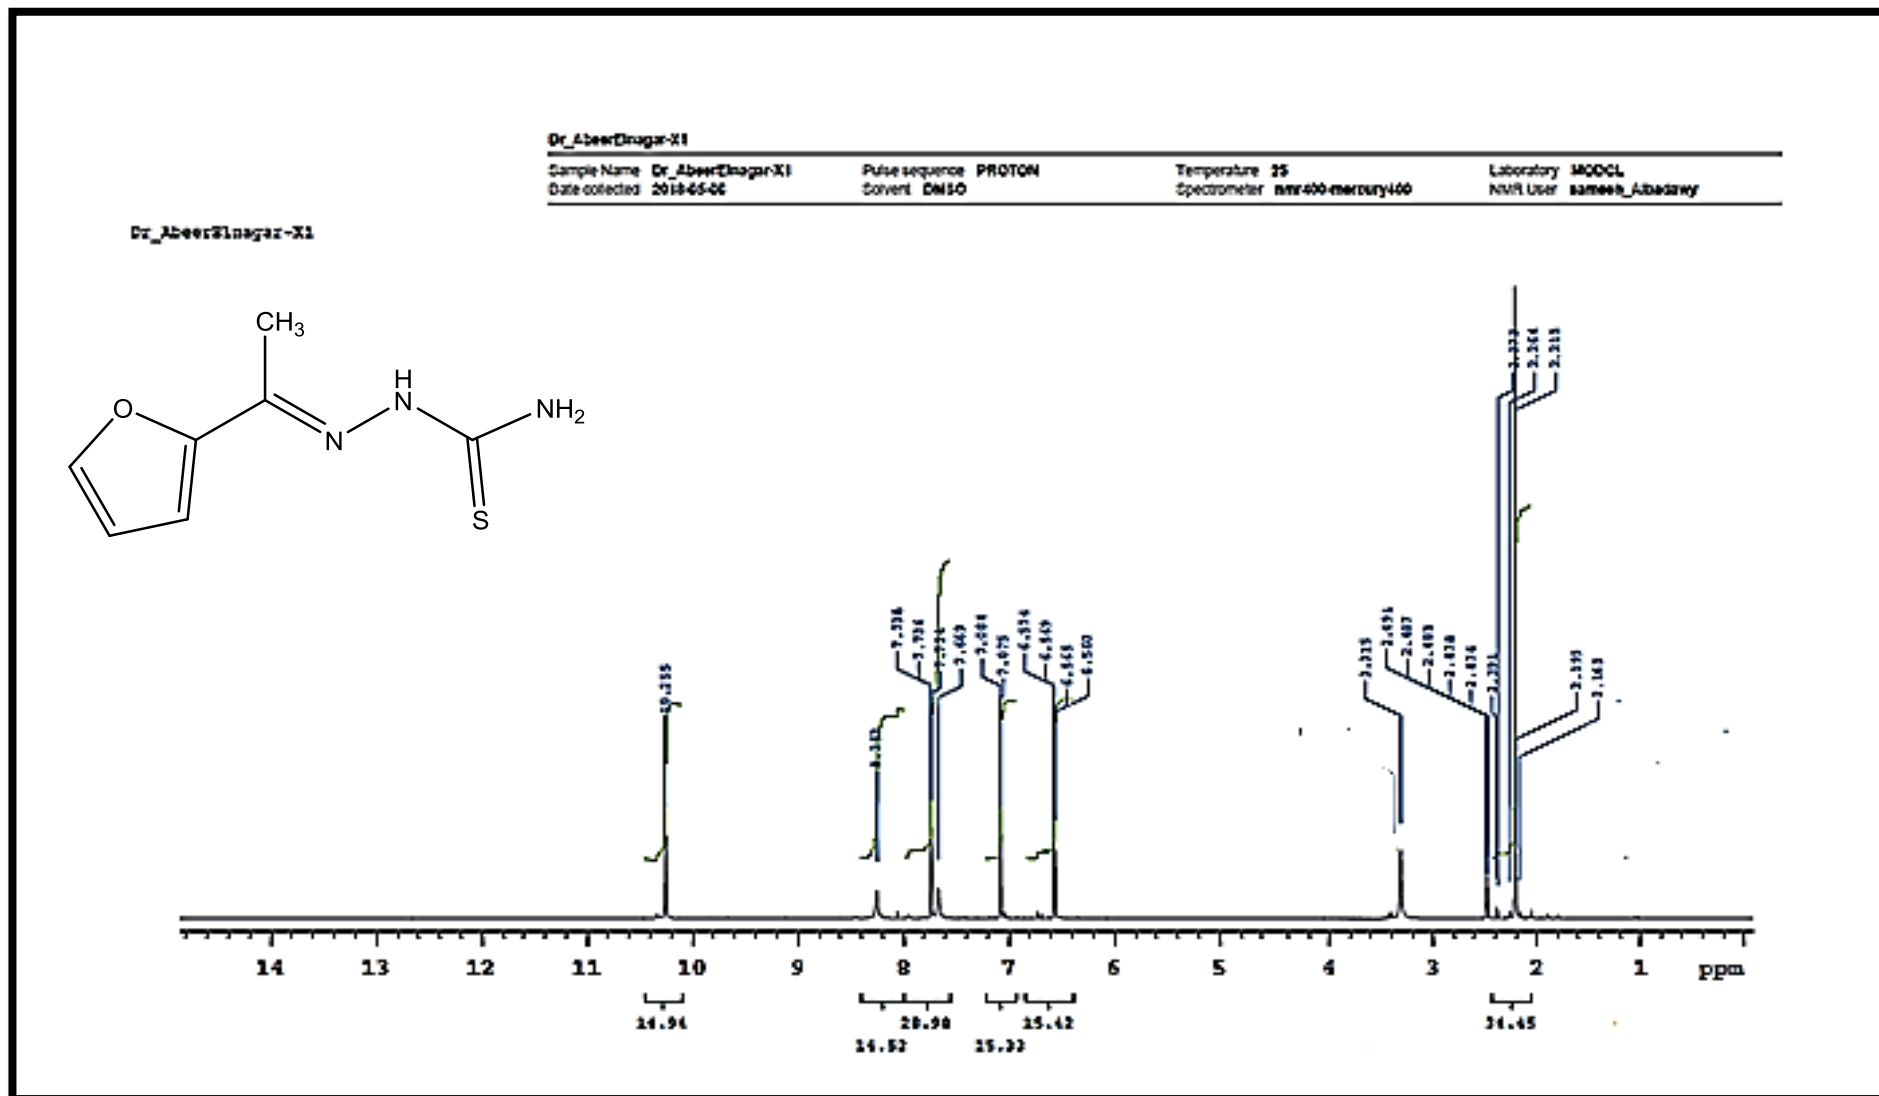

# D<sub>2</sub>O <sup>1</sup>H NMR of compound (7b)

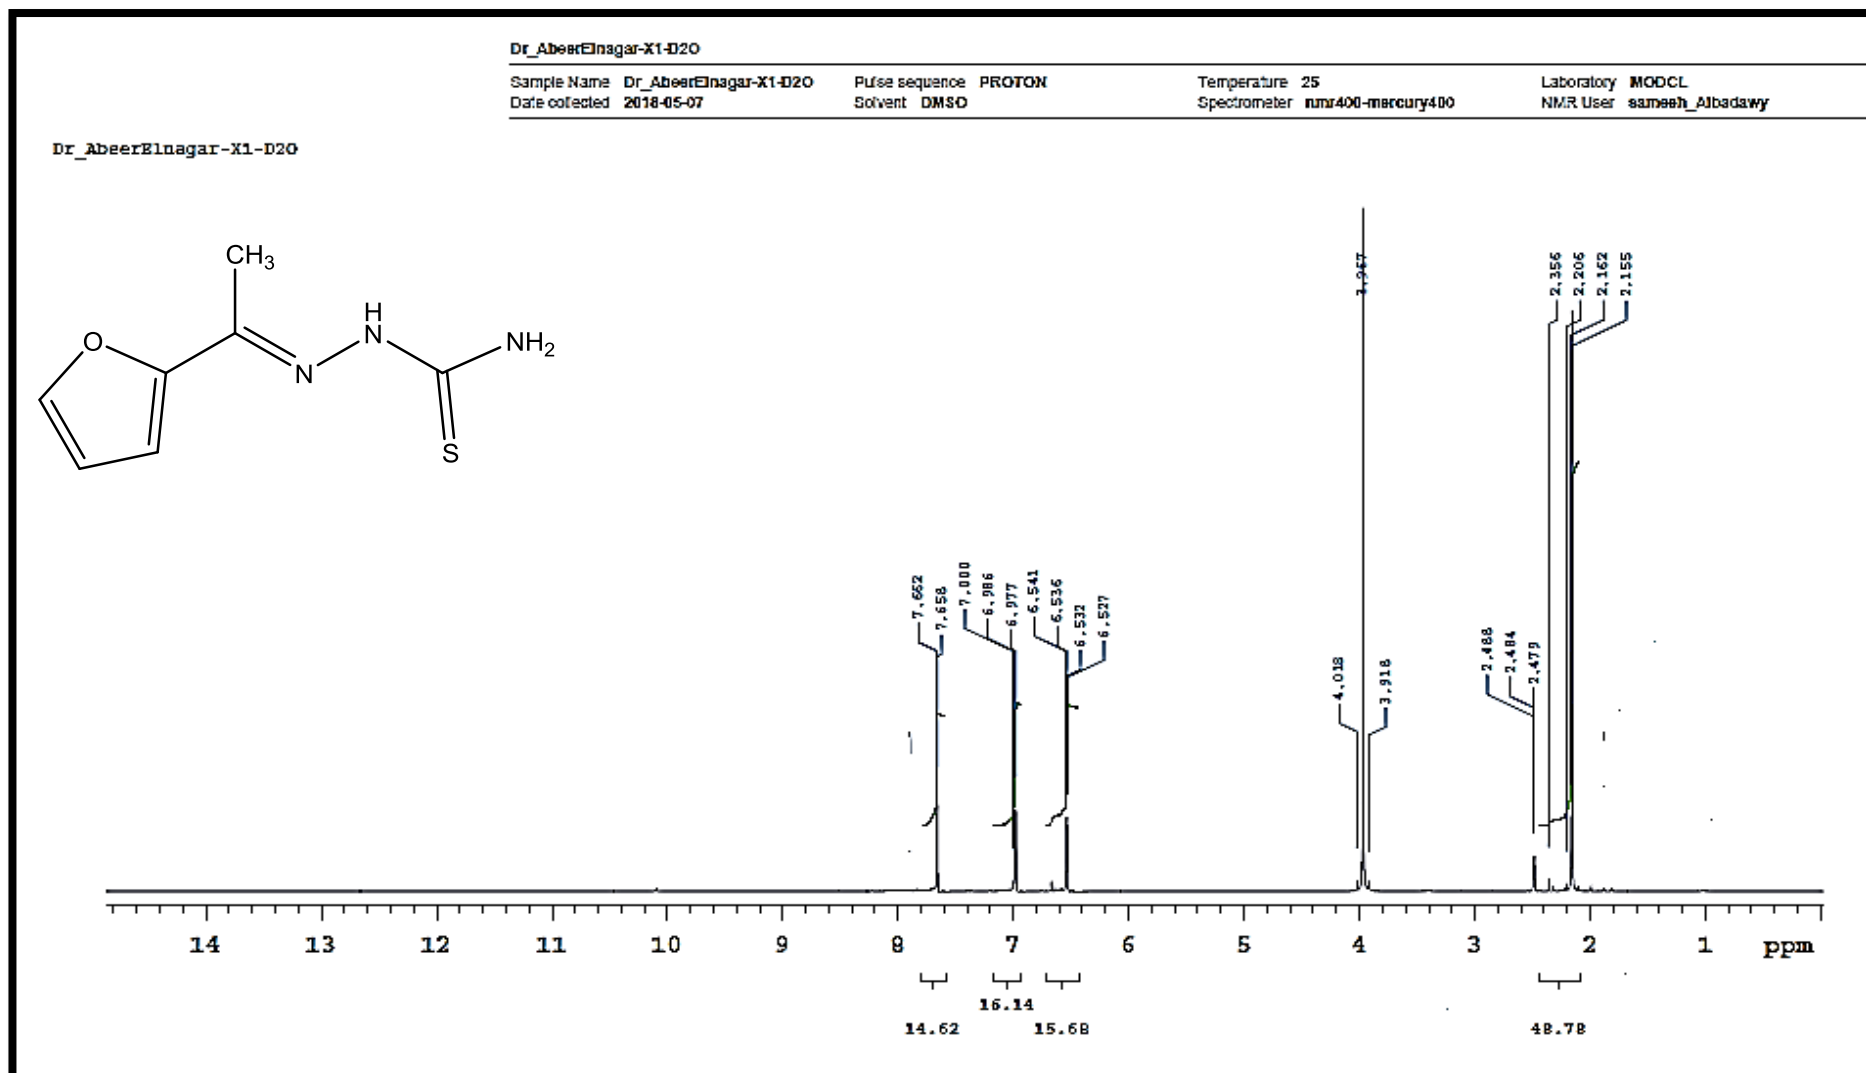

# IR of compound (4a).

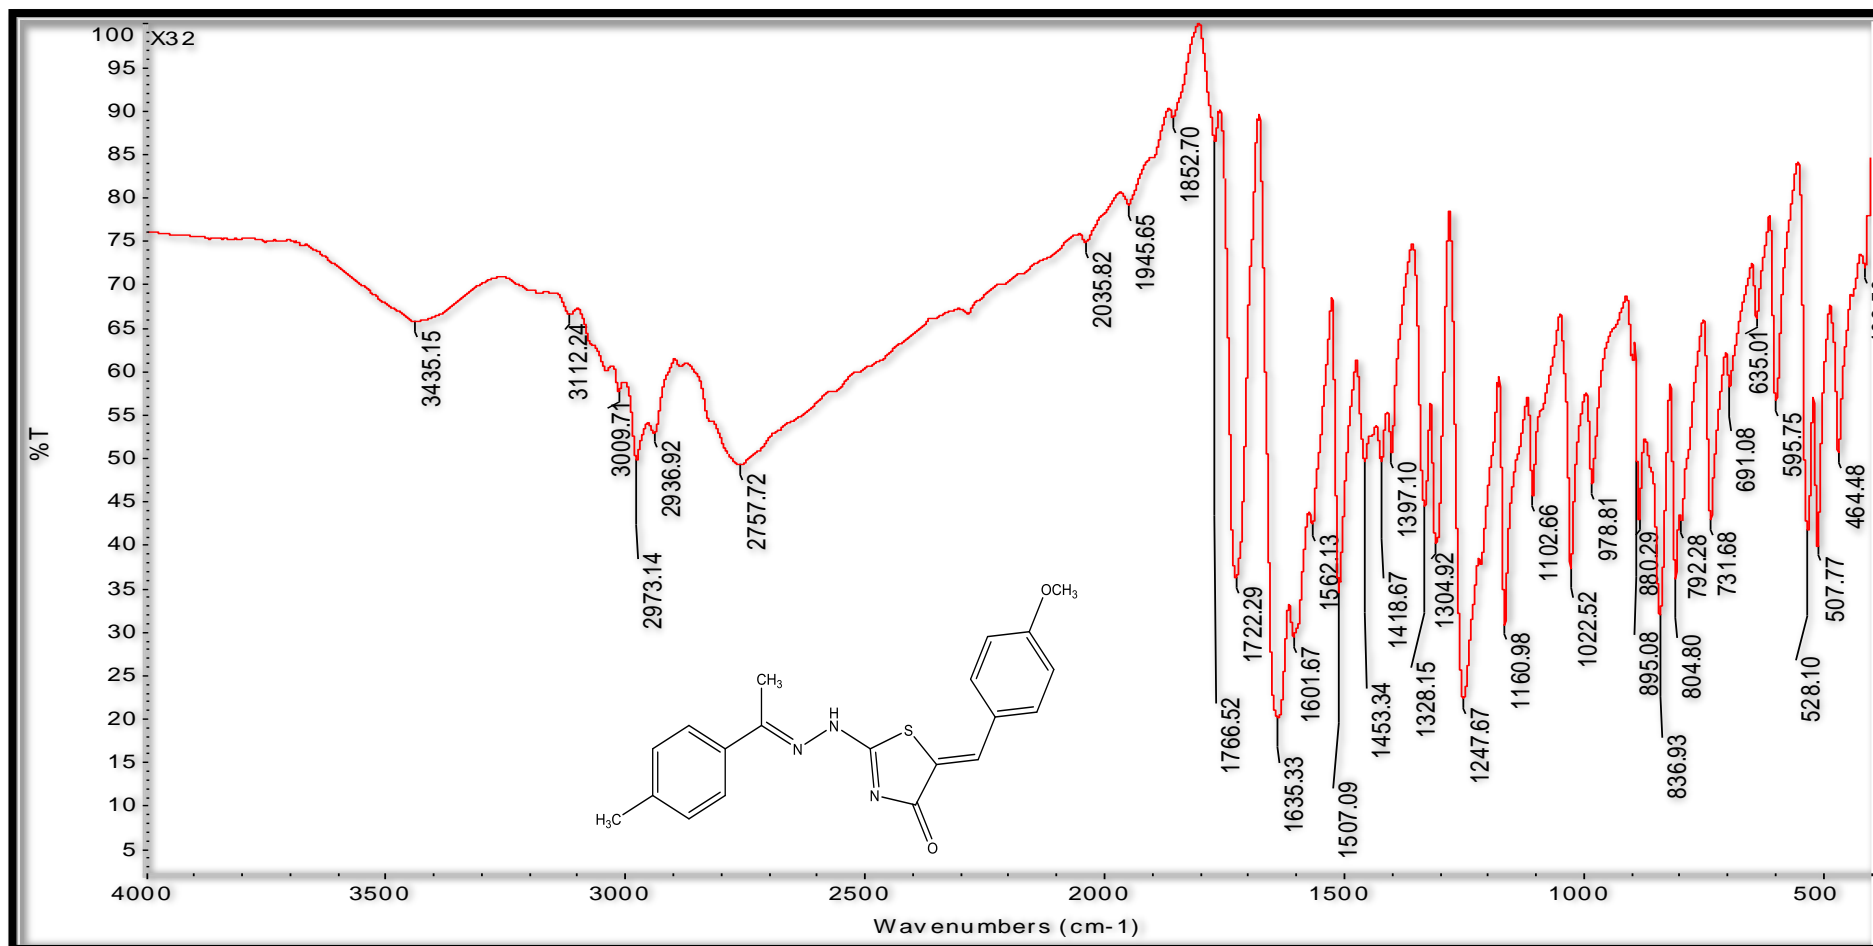

# <sup>1</sup>H NMR of compound (4a)

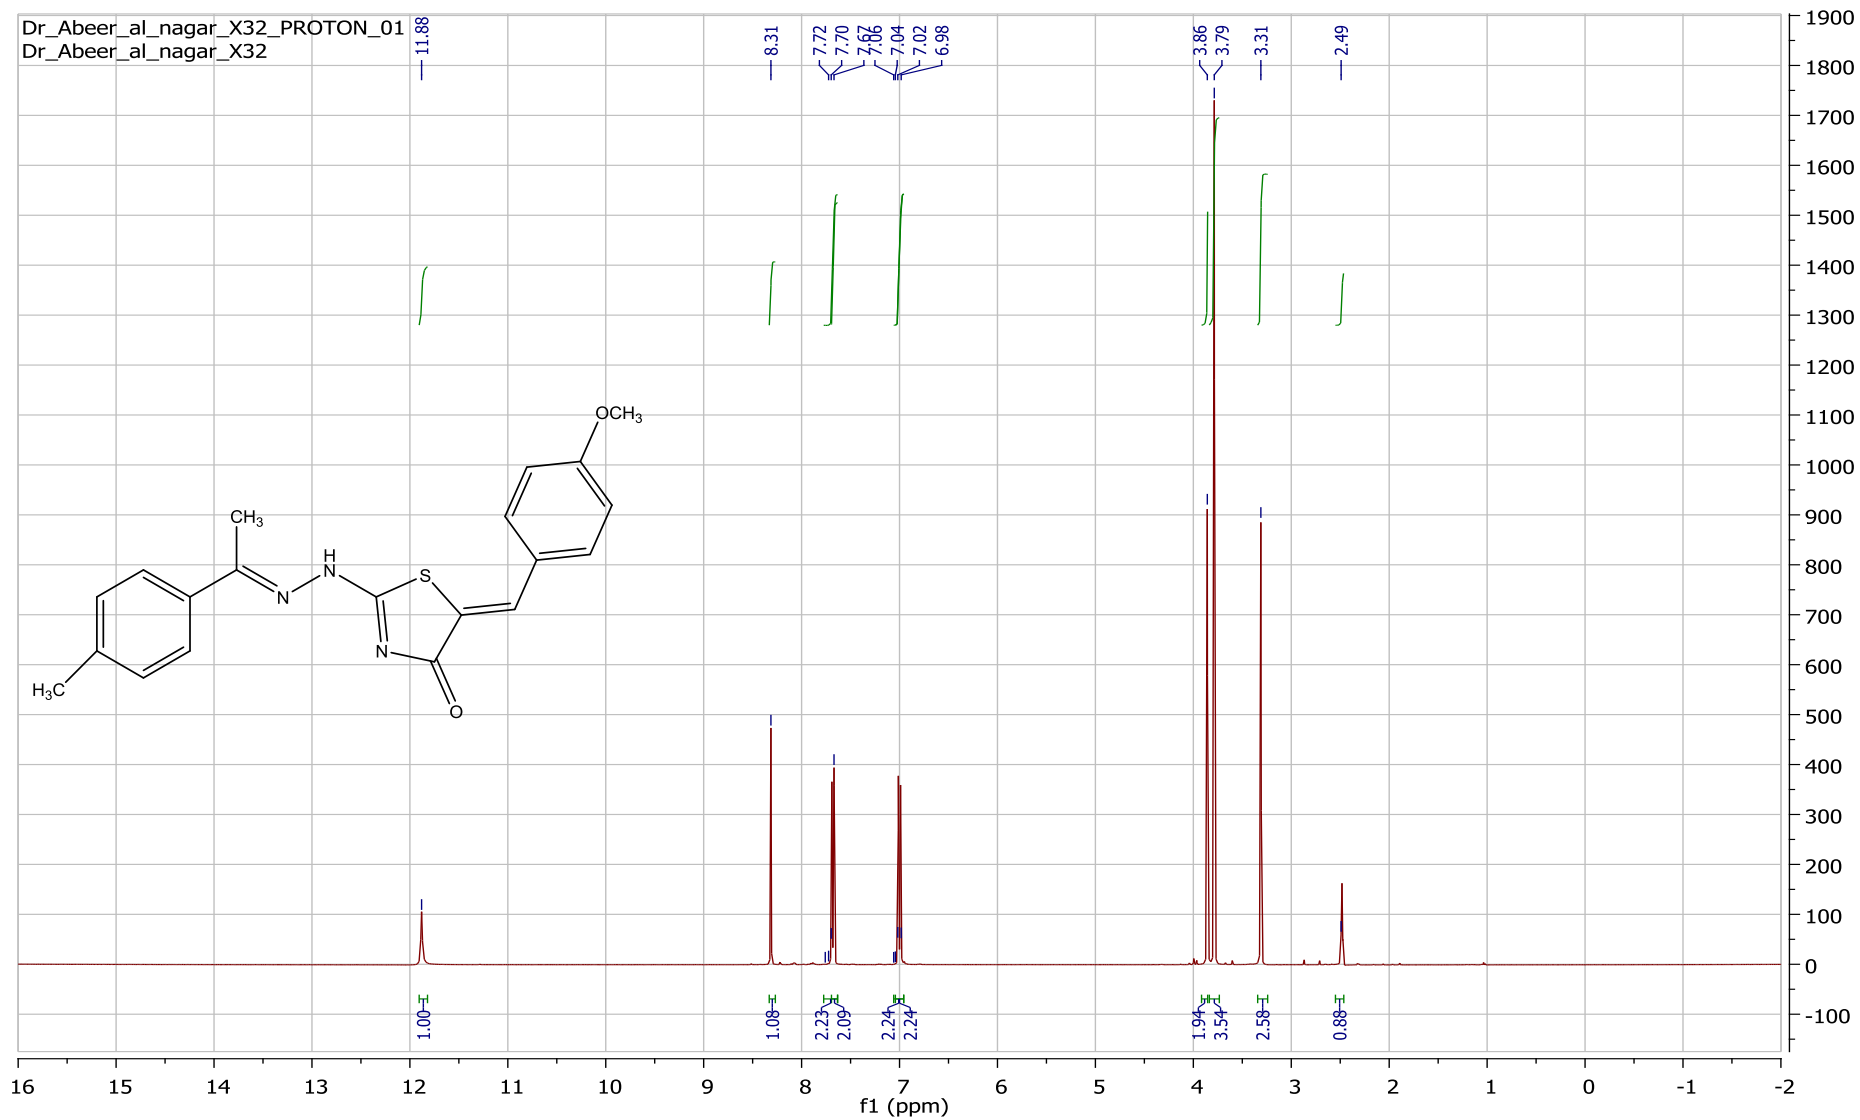

# D<sub>2</sub>O <sup>1</sup>H NMR of compound (4a)

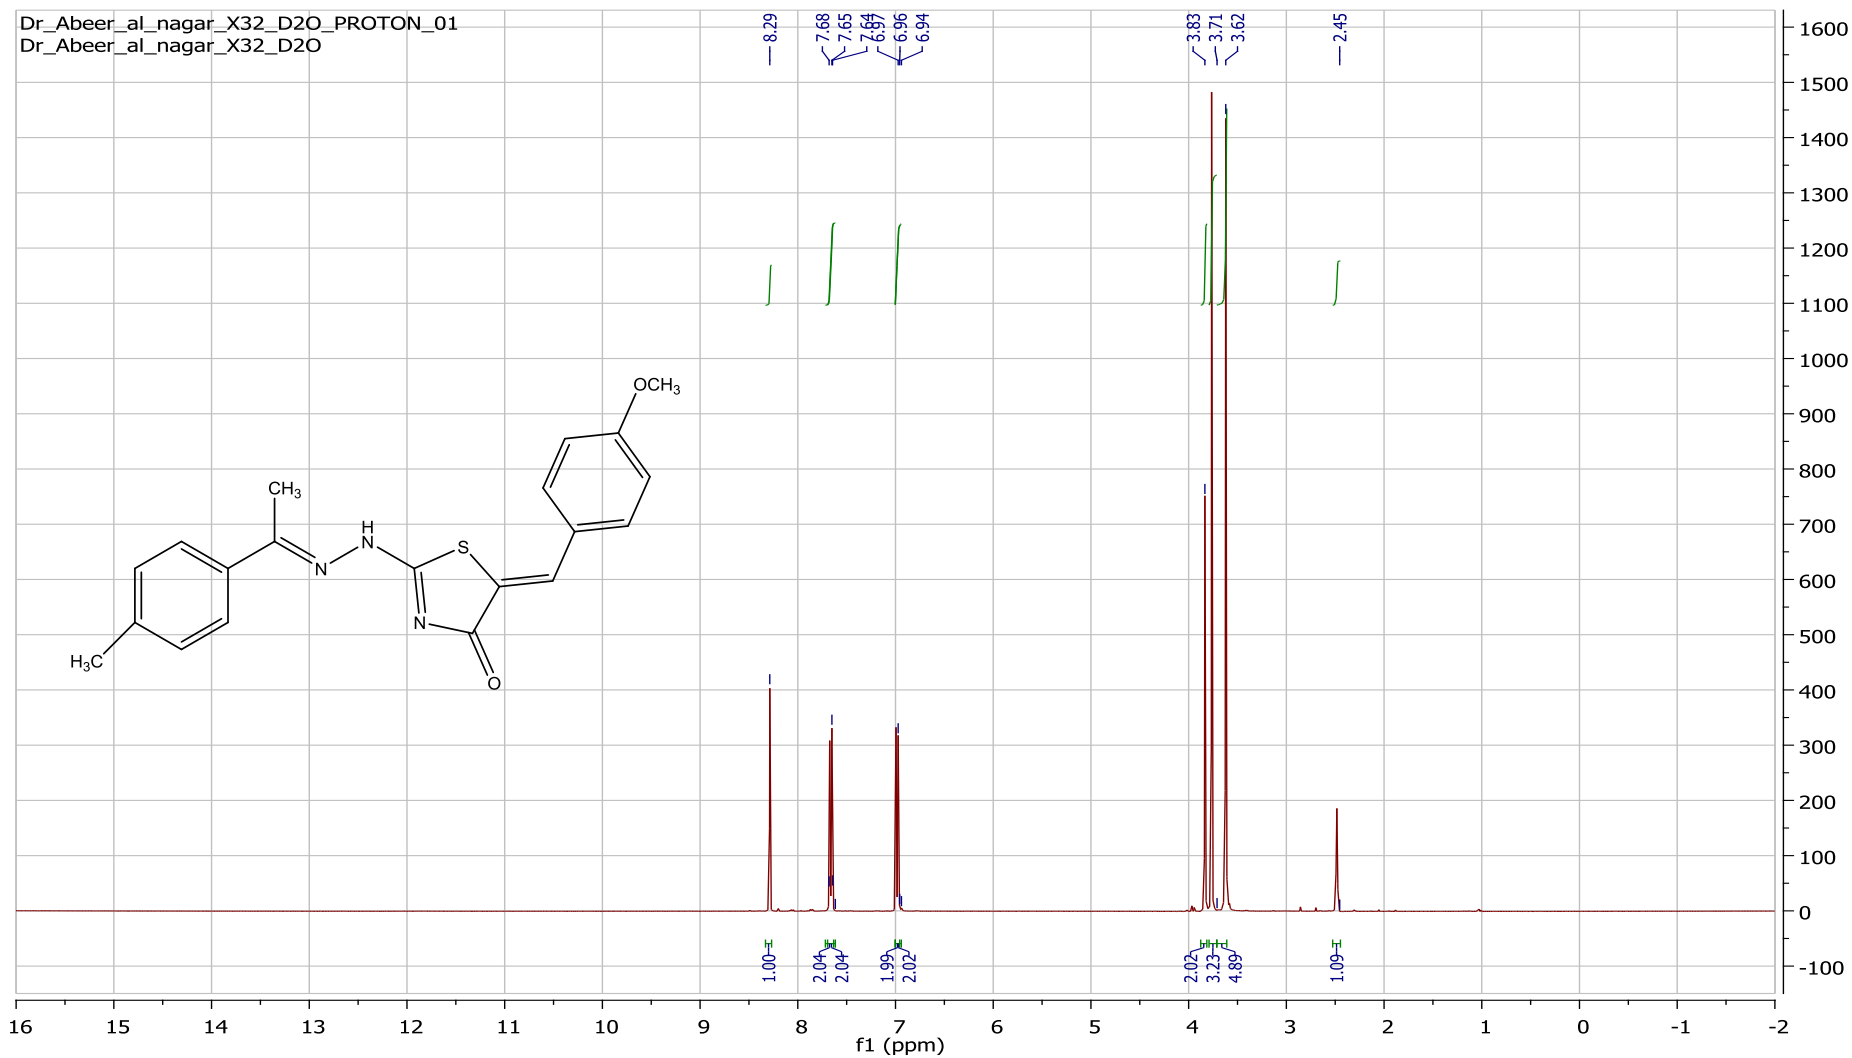



# IR of compound (4b)

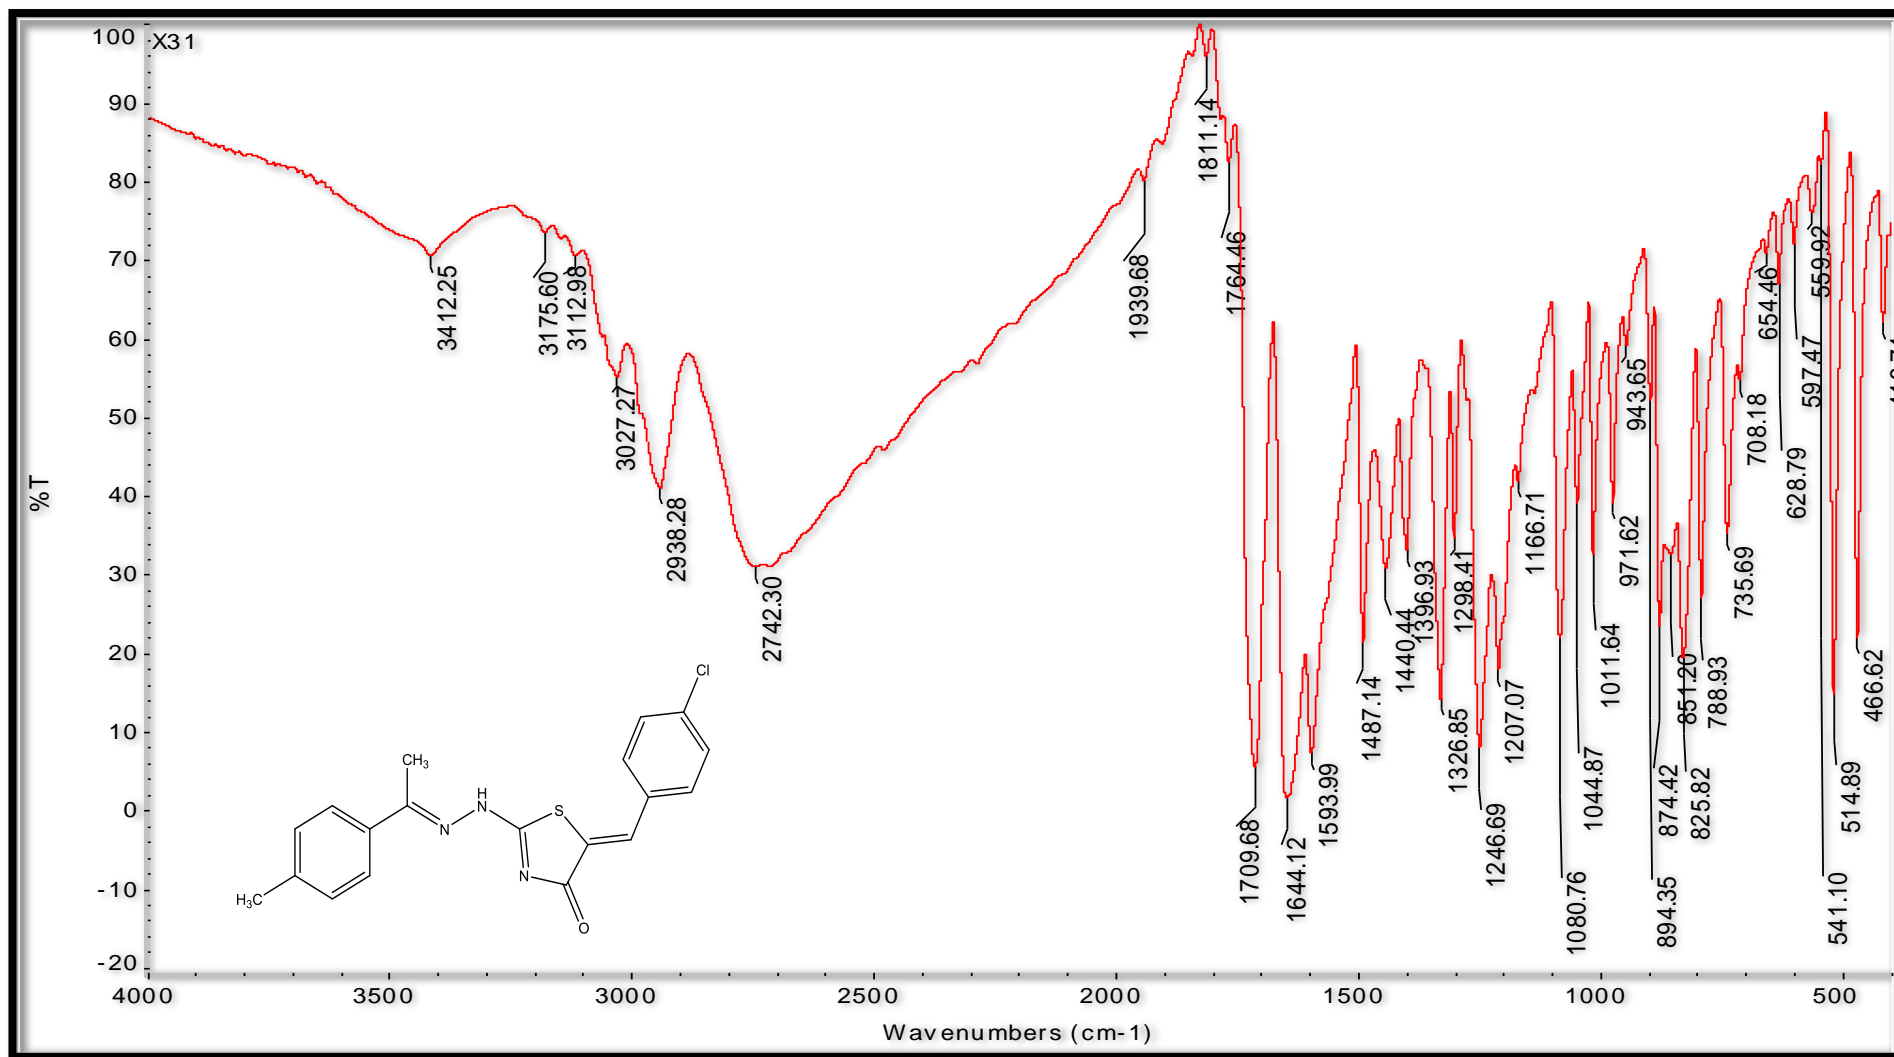

# <sup>1</sup>H NMR of compound (4b)

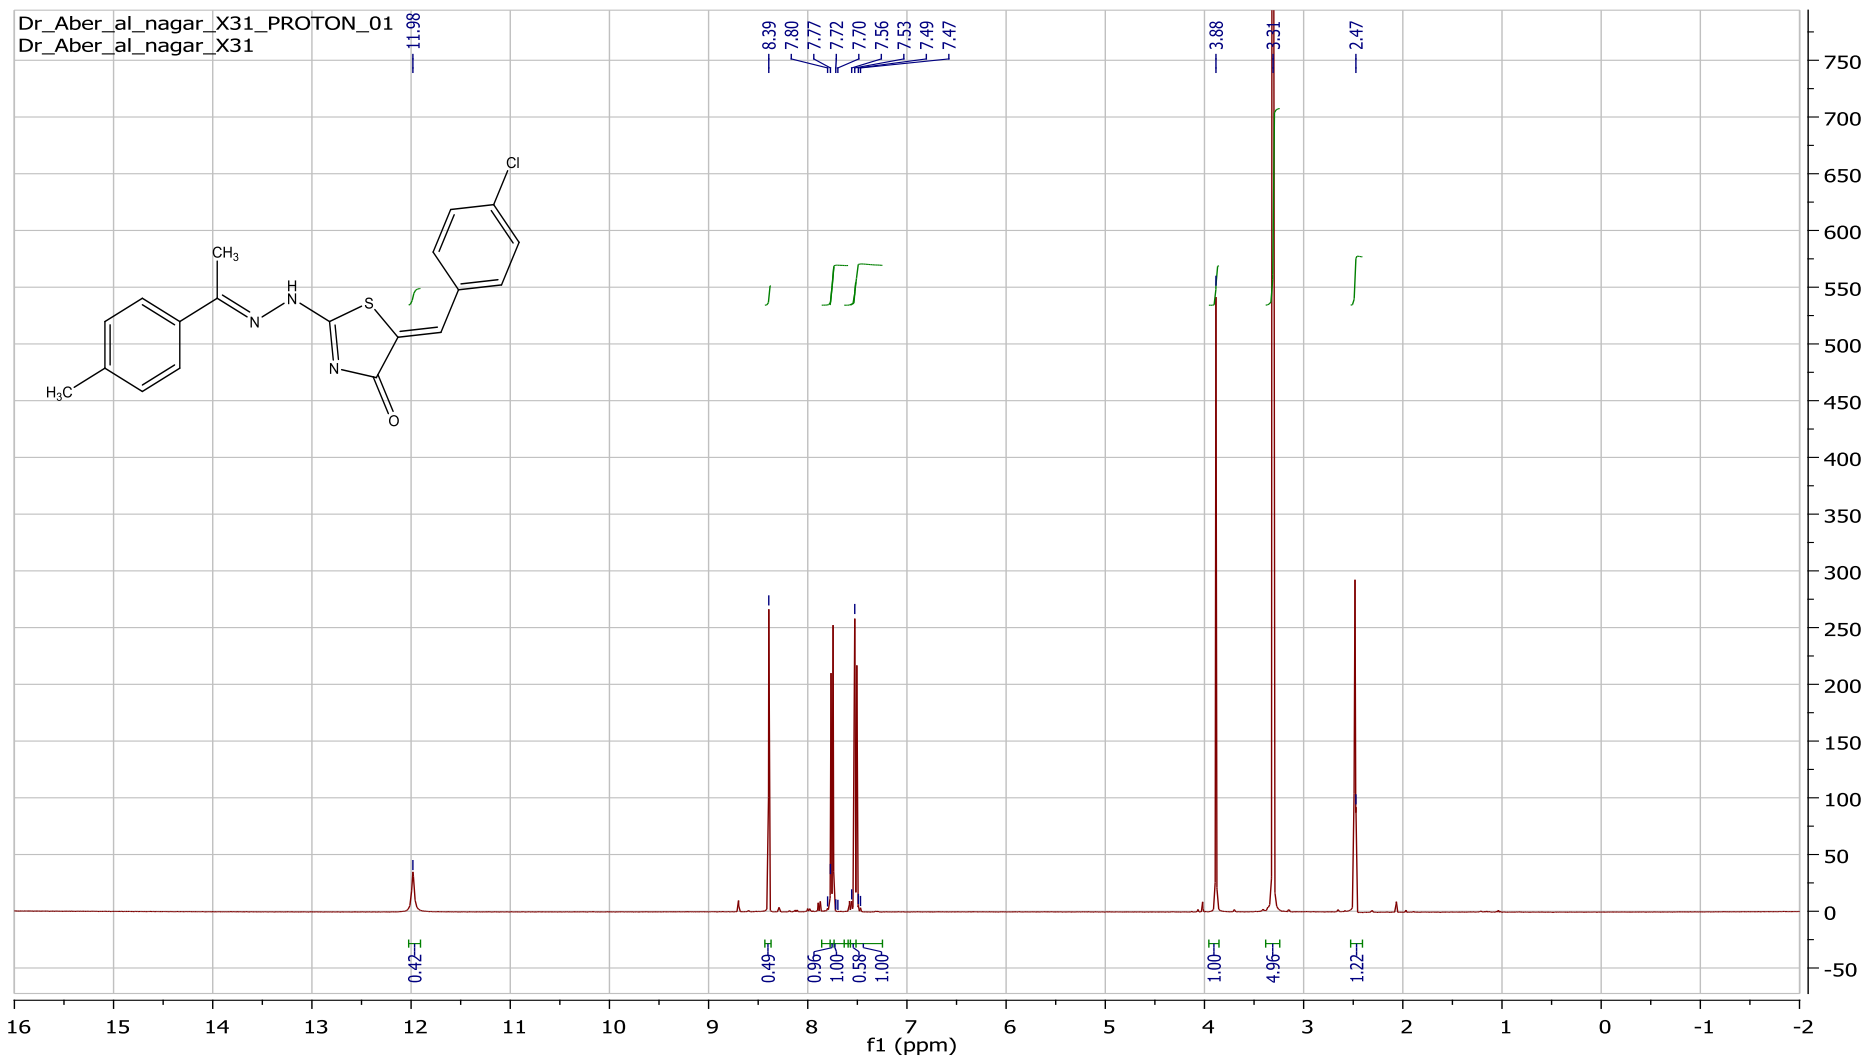

# D<sub>2</sub>O <sup>1</sup>H NMR of compound (4b)

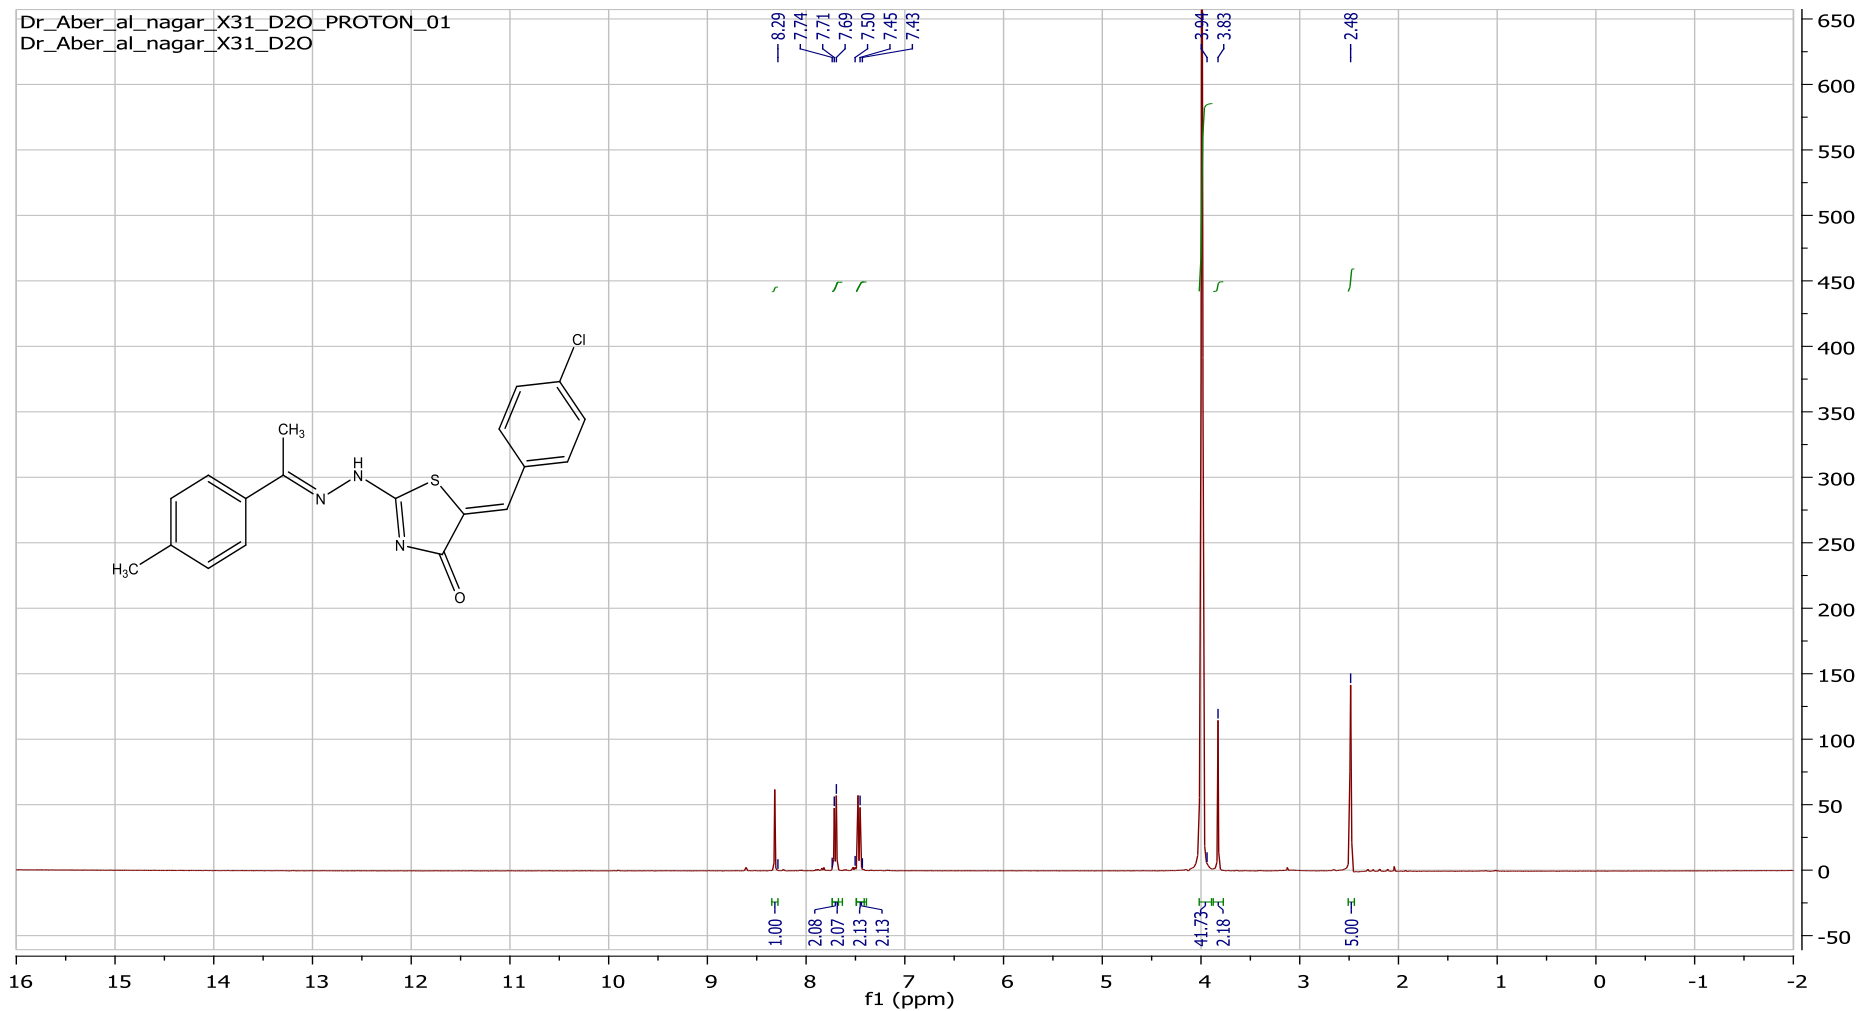

# IR of compound (4c)

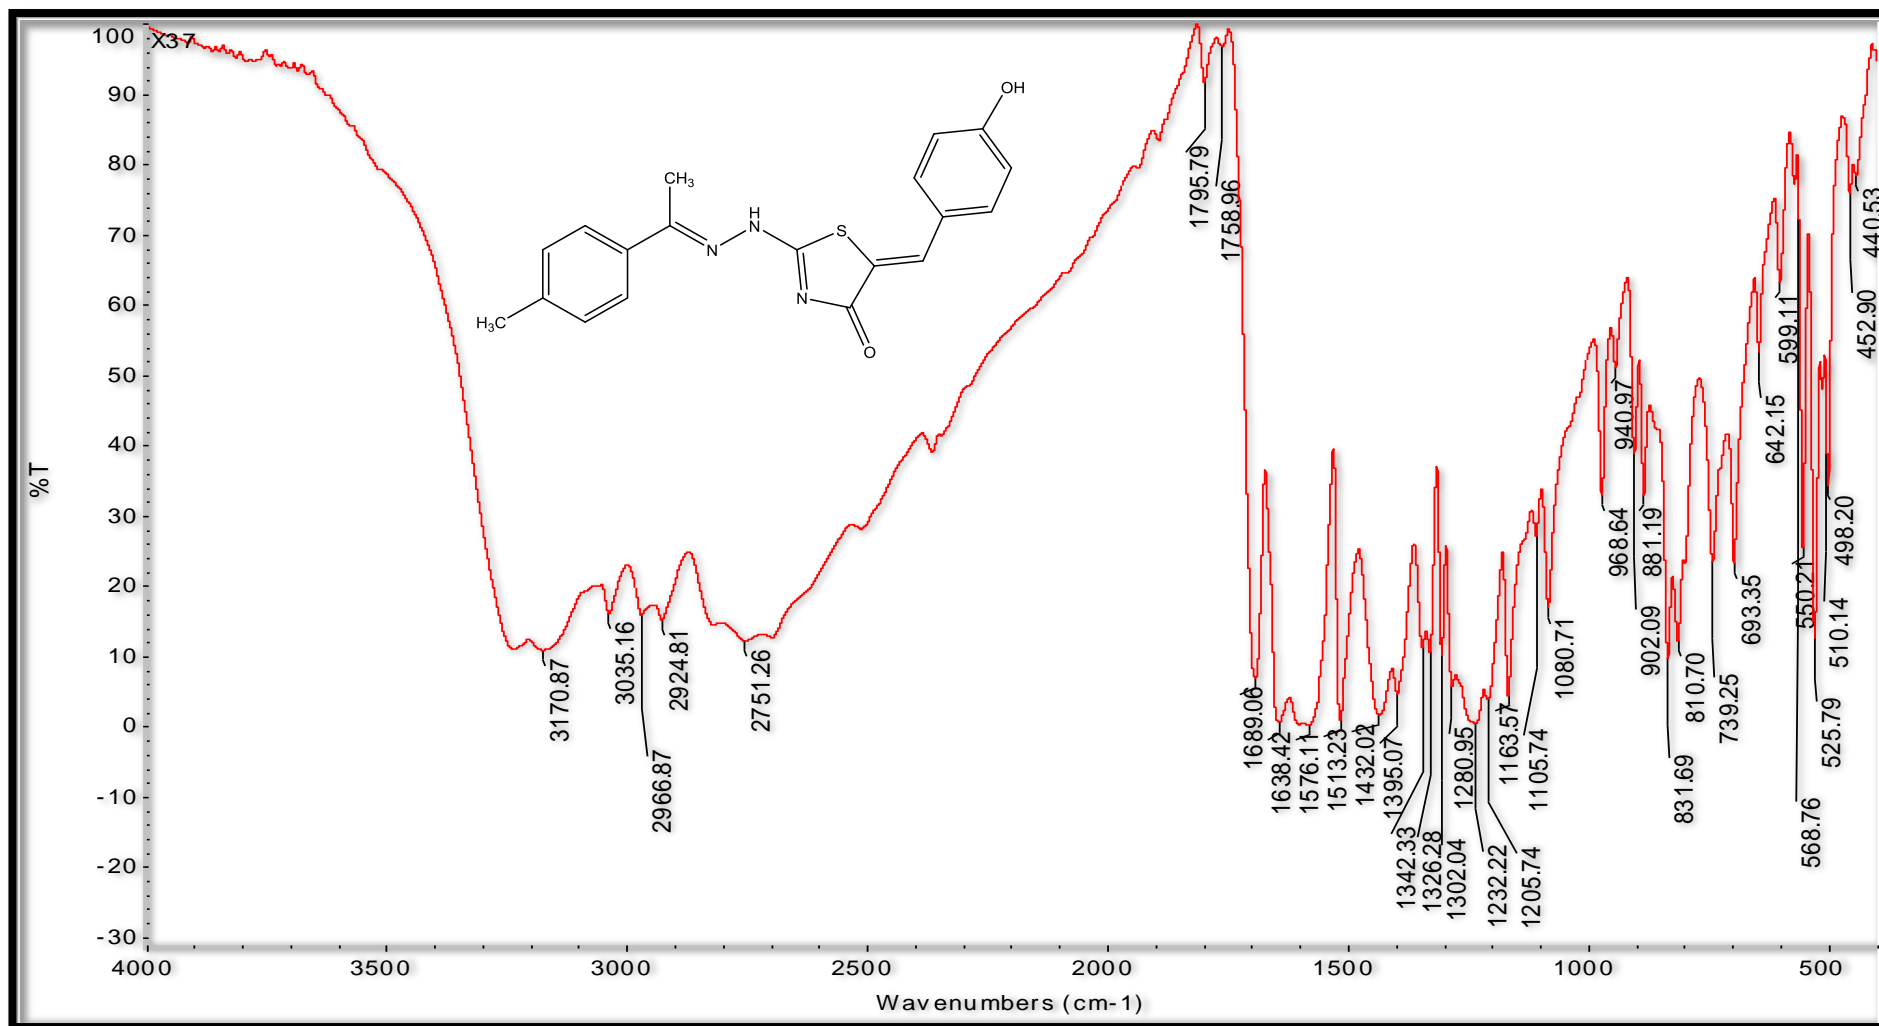

# <sup>1</sup>H NMR of compound (4c).

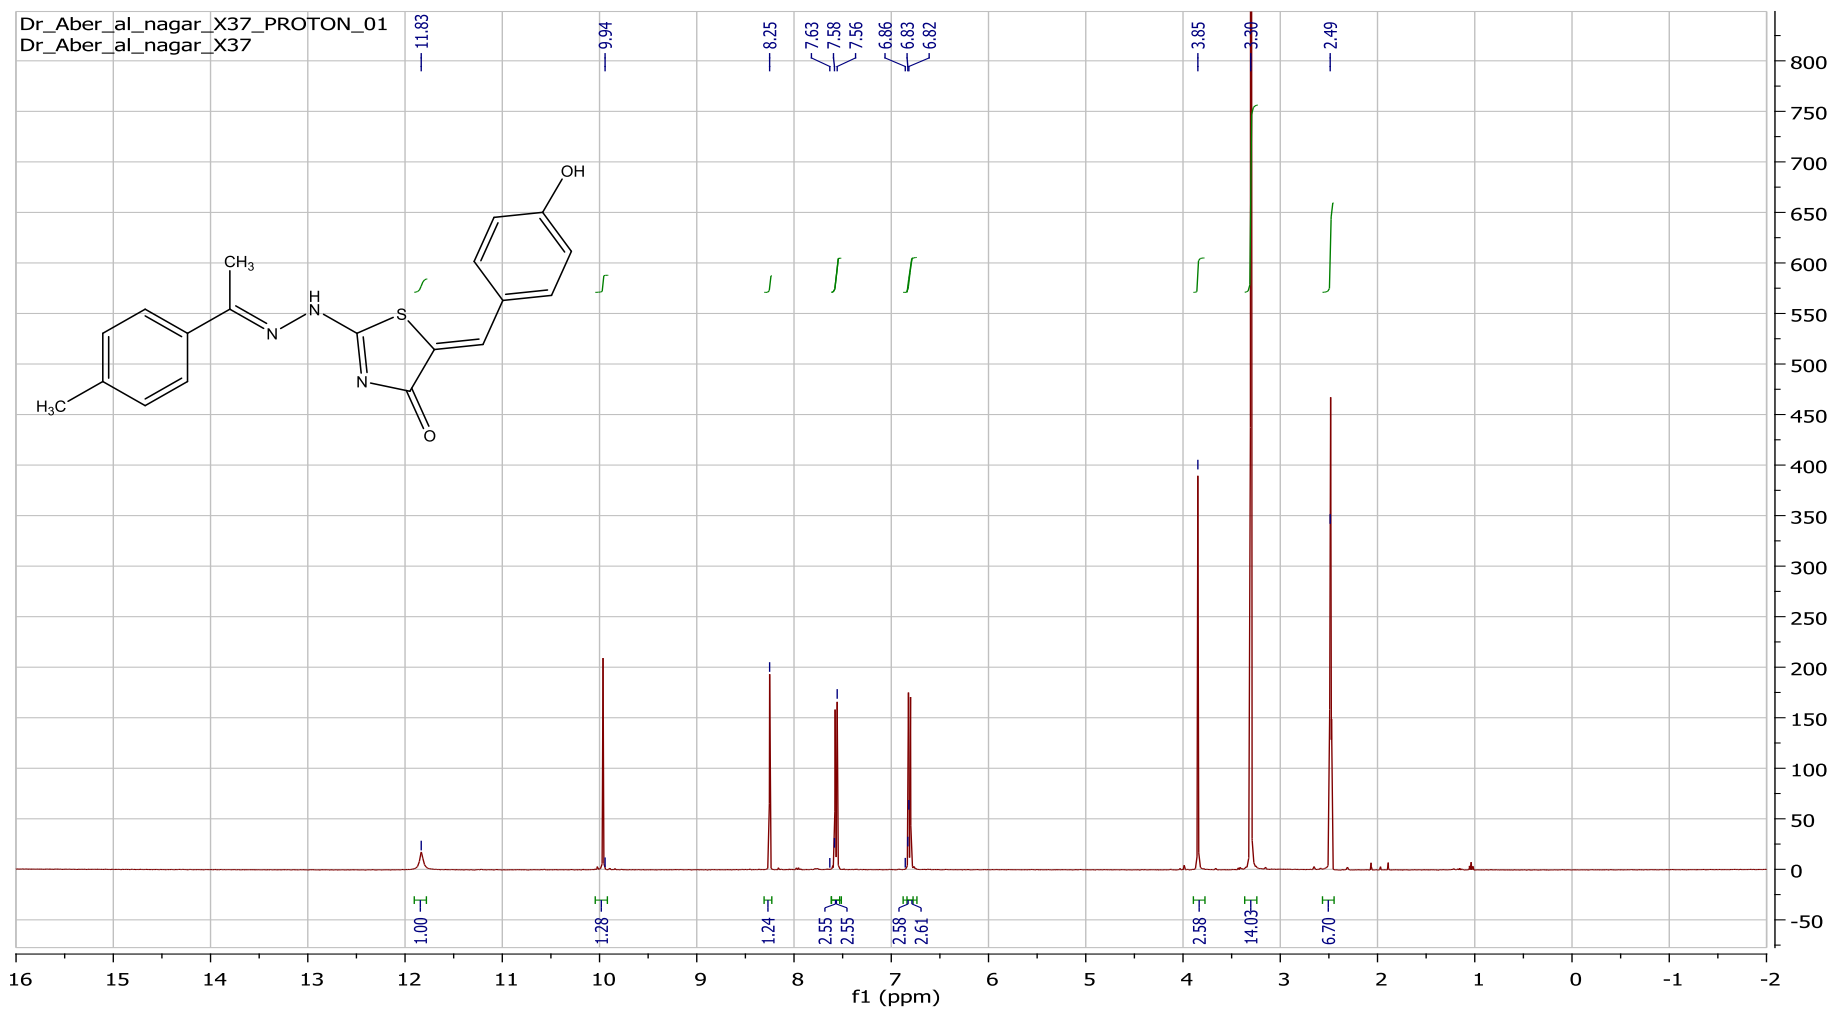

# IR of compound (4d)

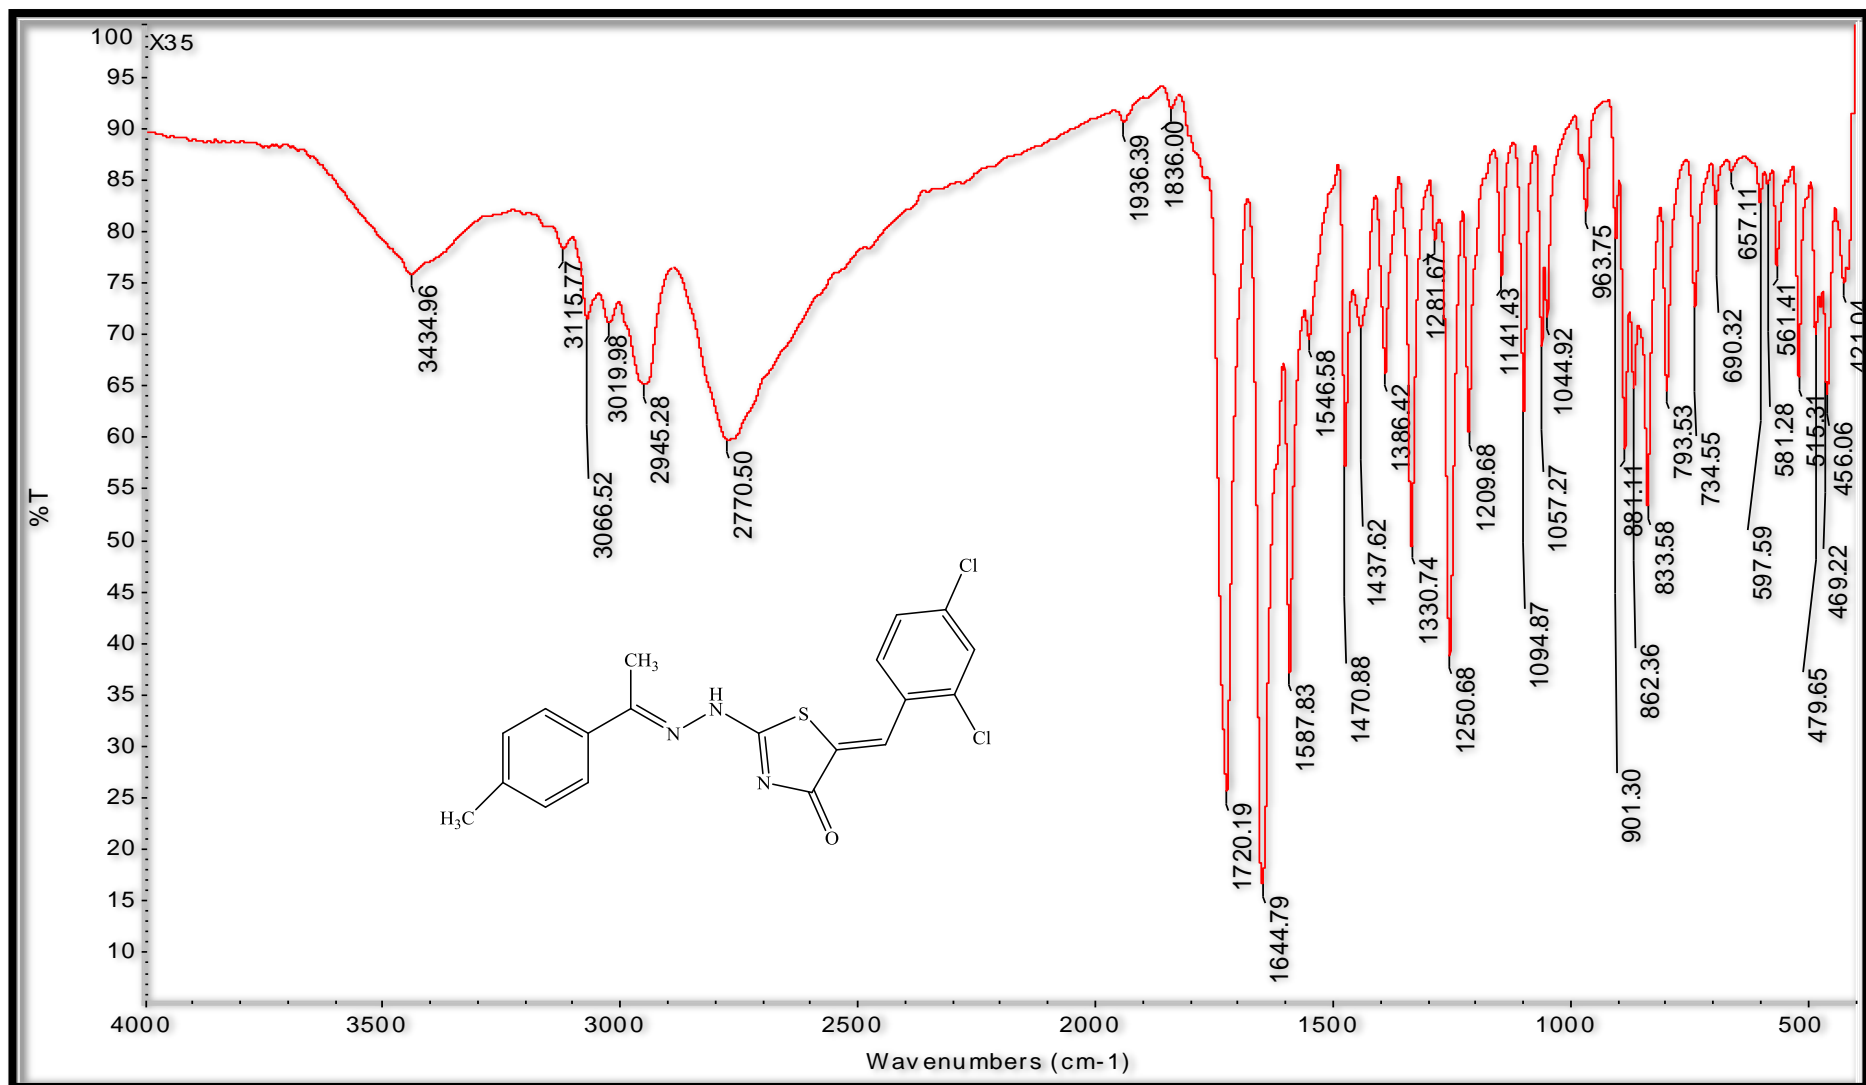

# <sup>1</sup>H NMR of compound (4d)

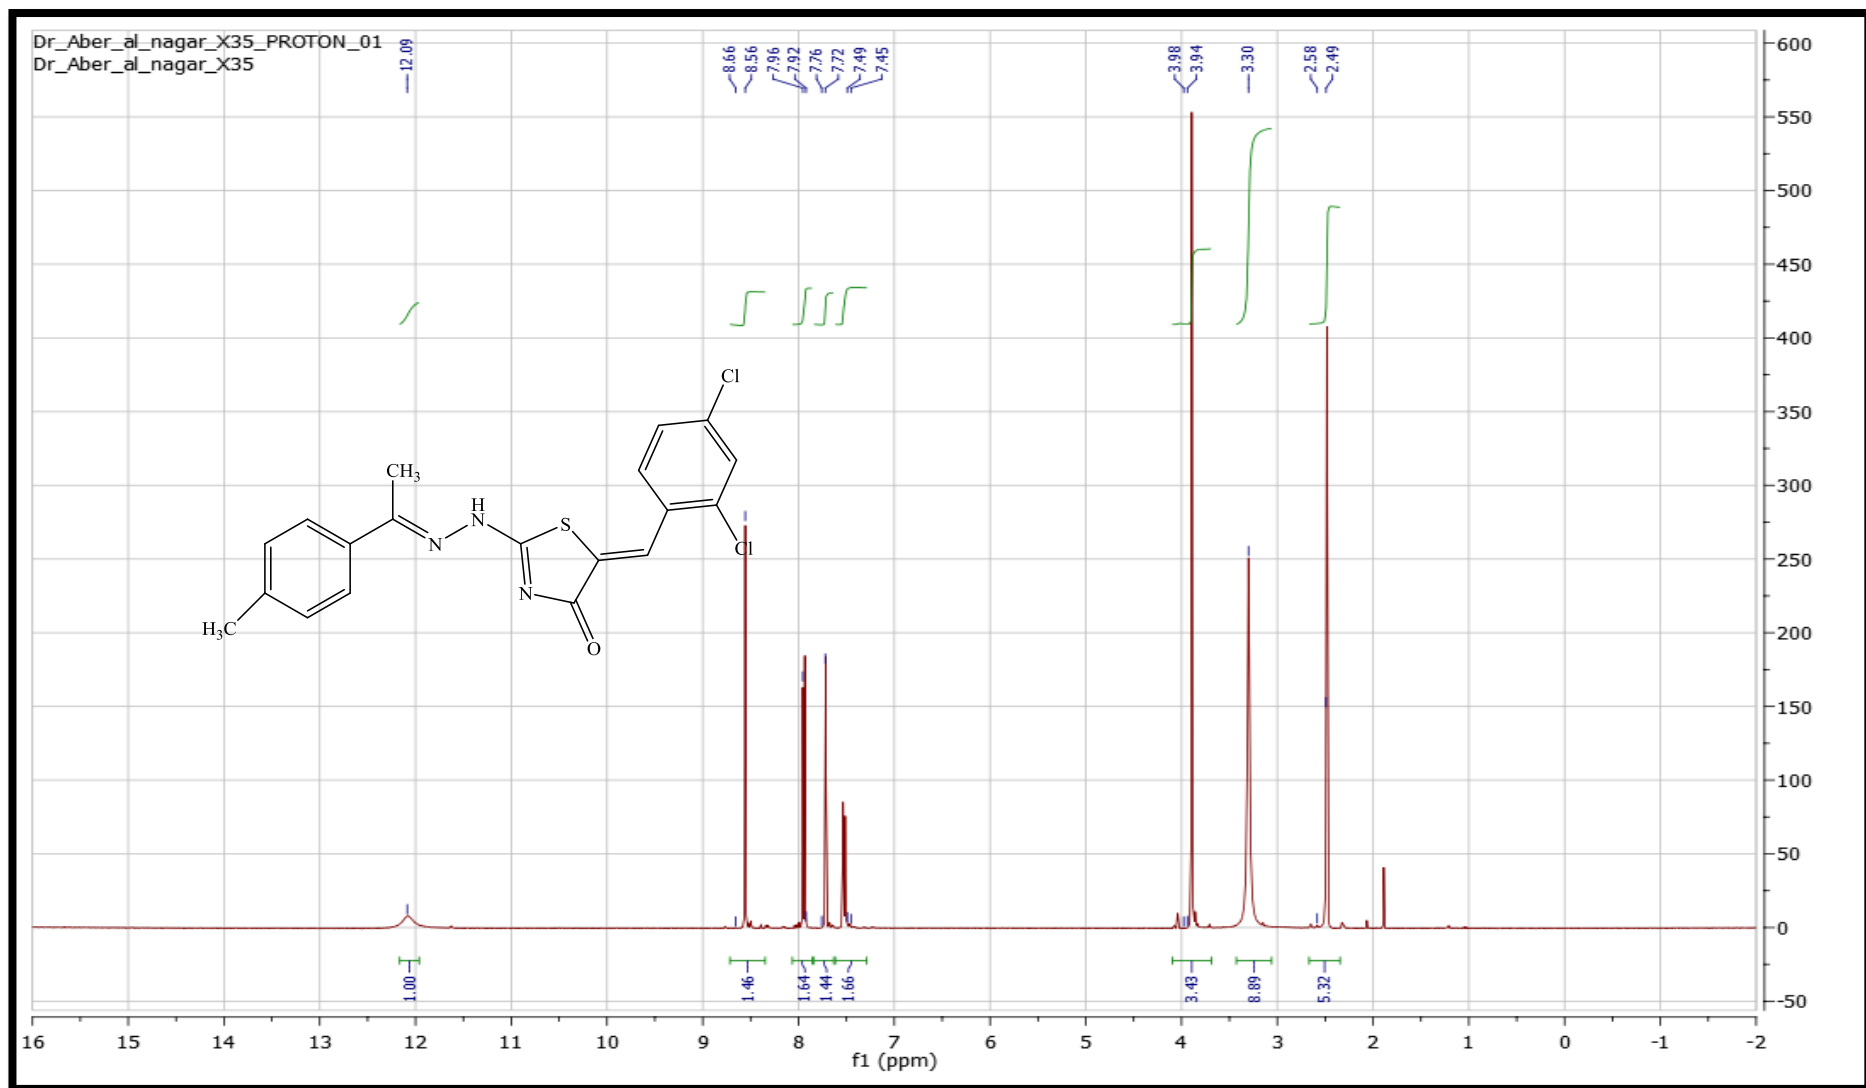

# <sup>1</sup>H NMR of compound (4d)

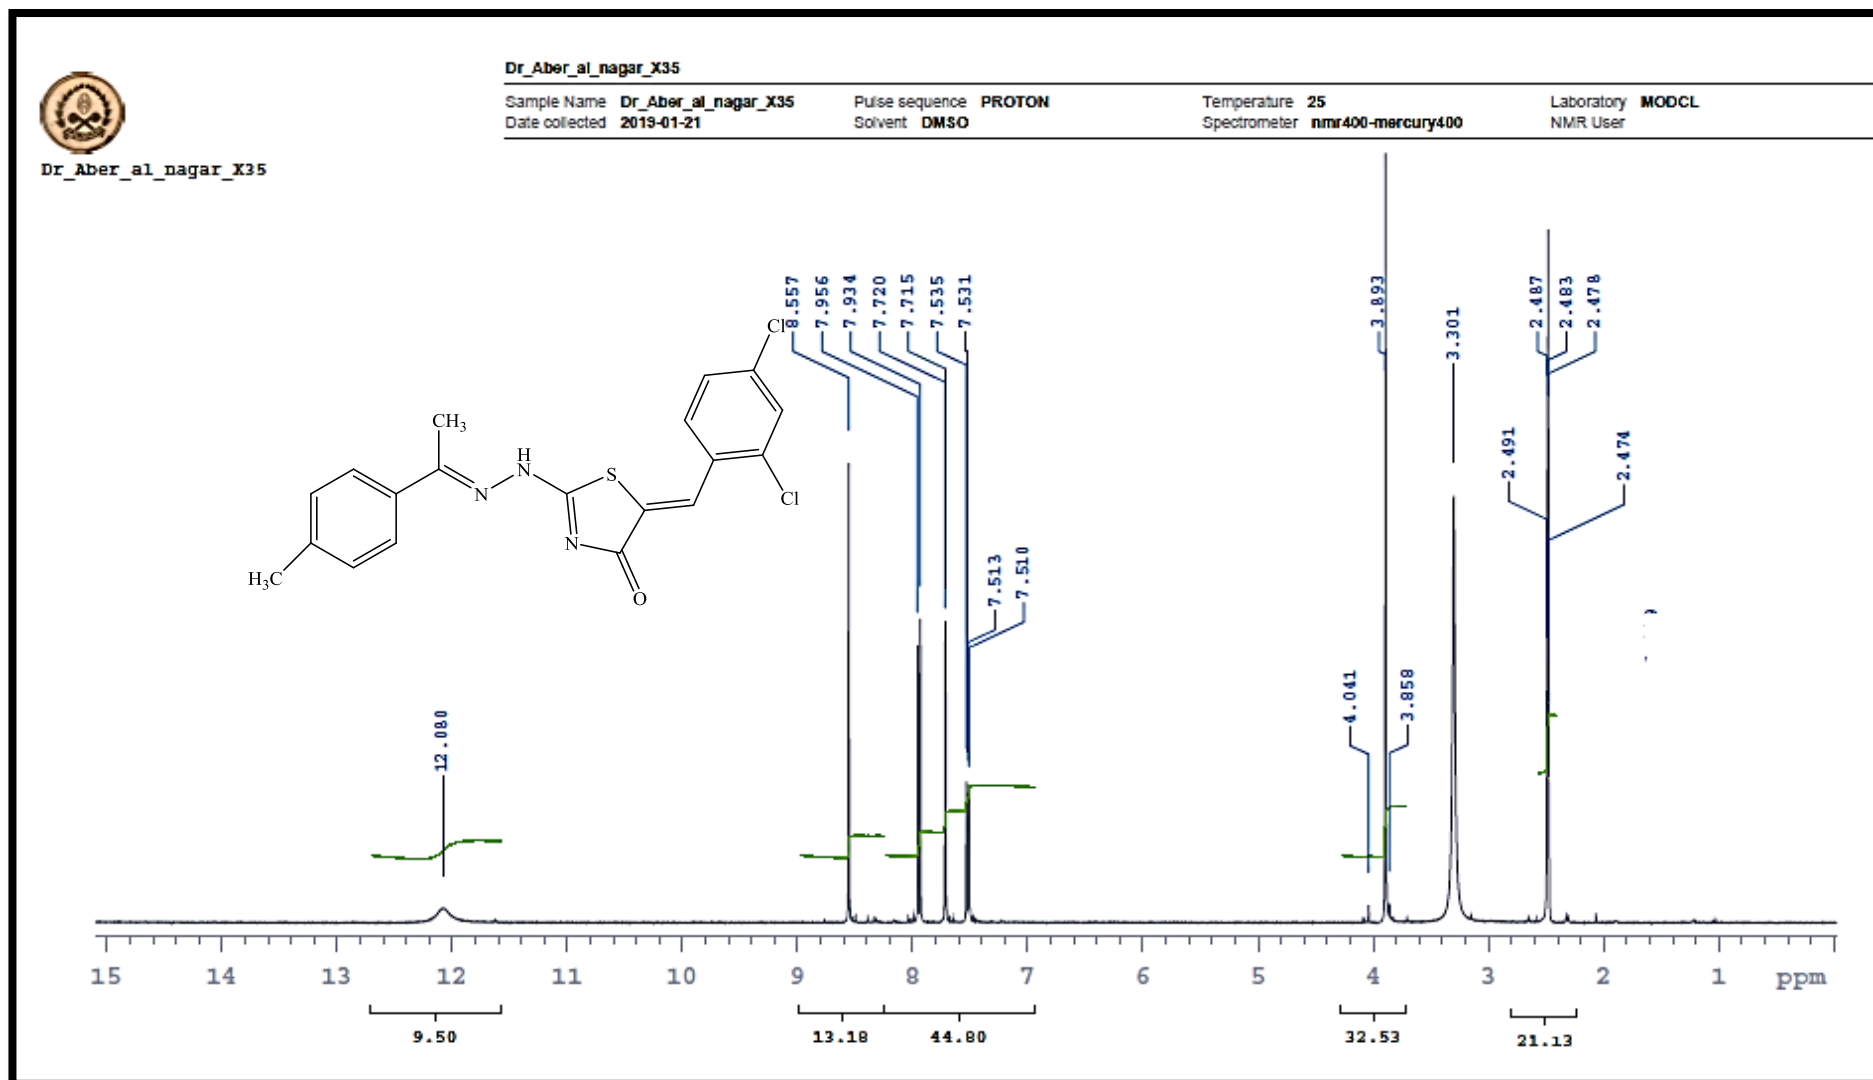



# IR of compound (4e)

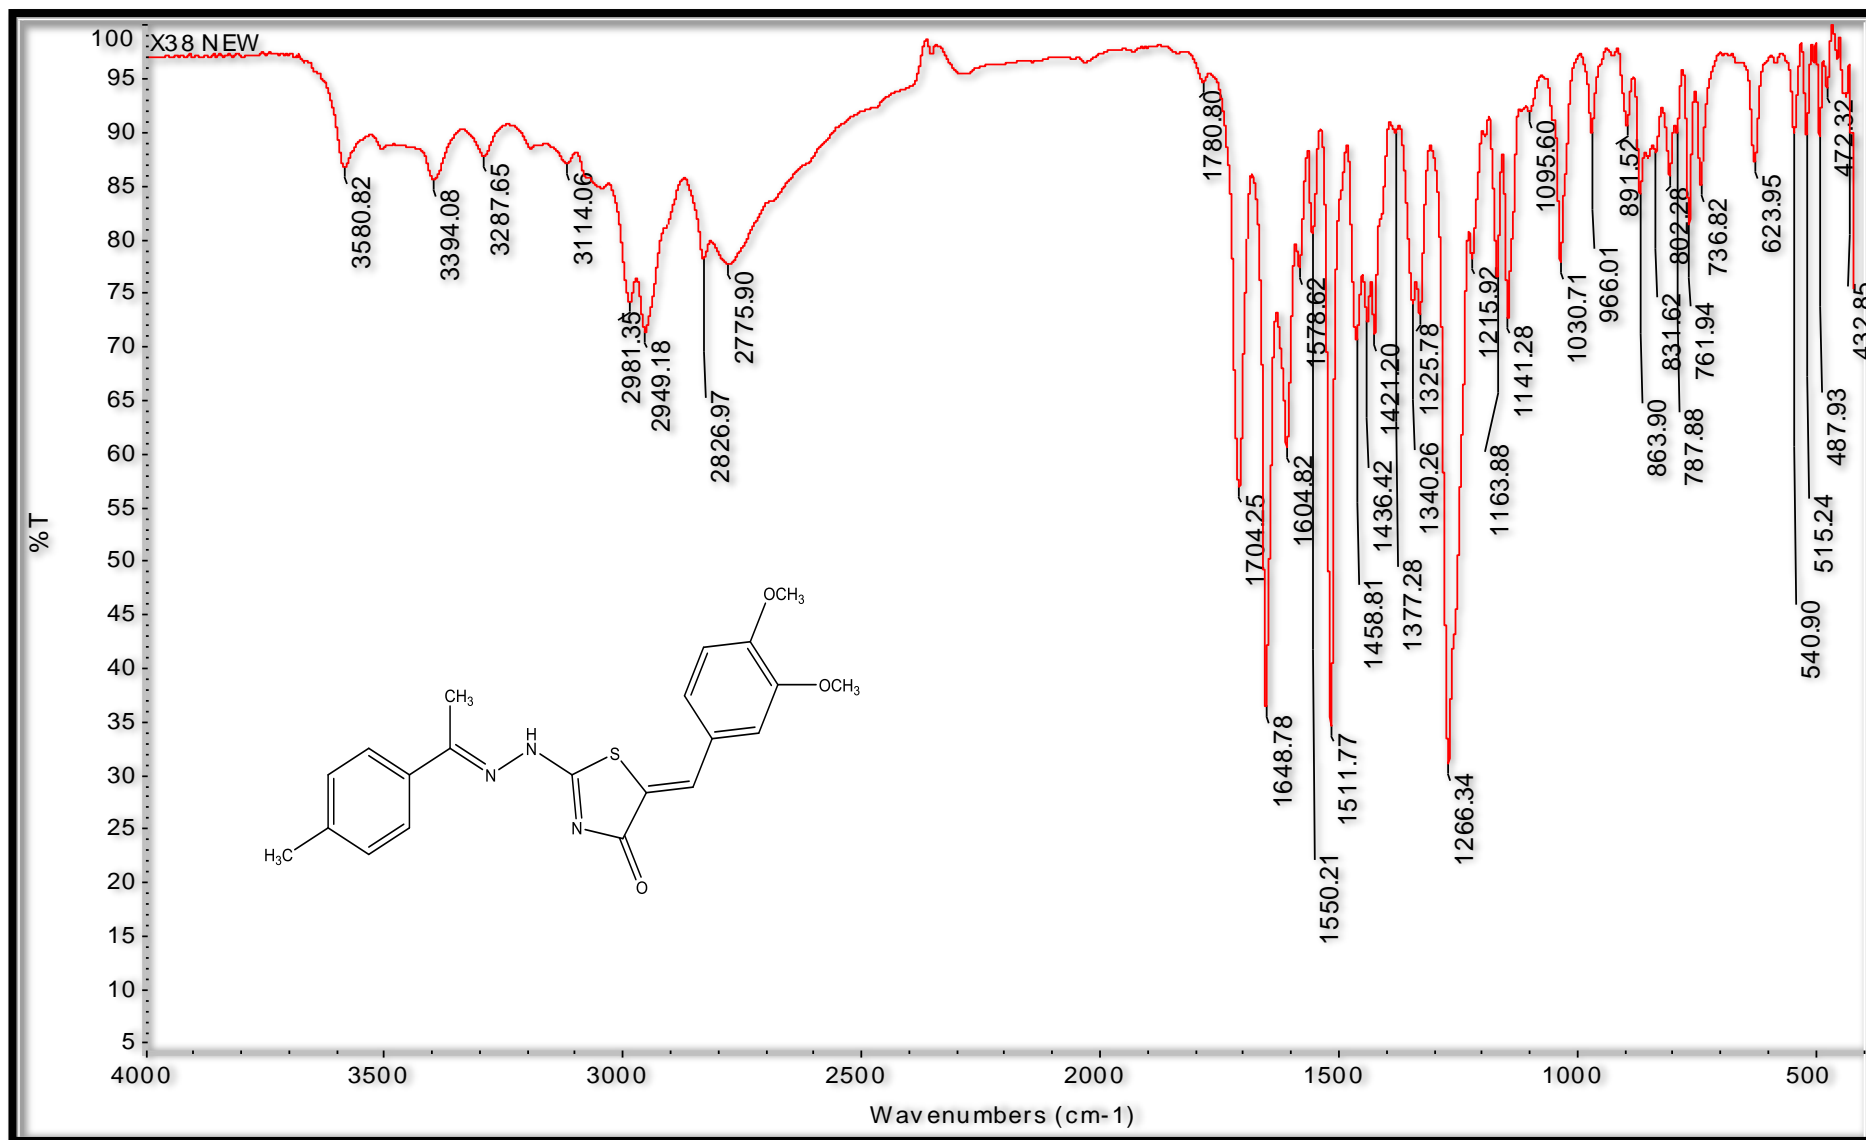

# <sup>1</sup>H NMR of compound (4e)

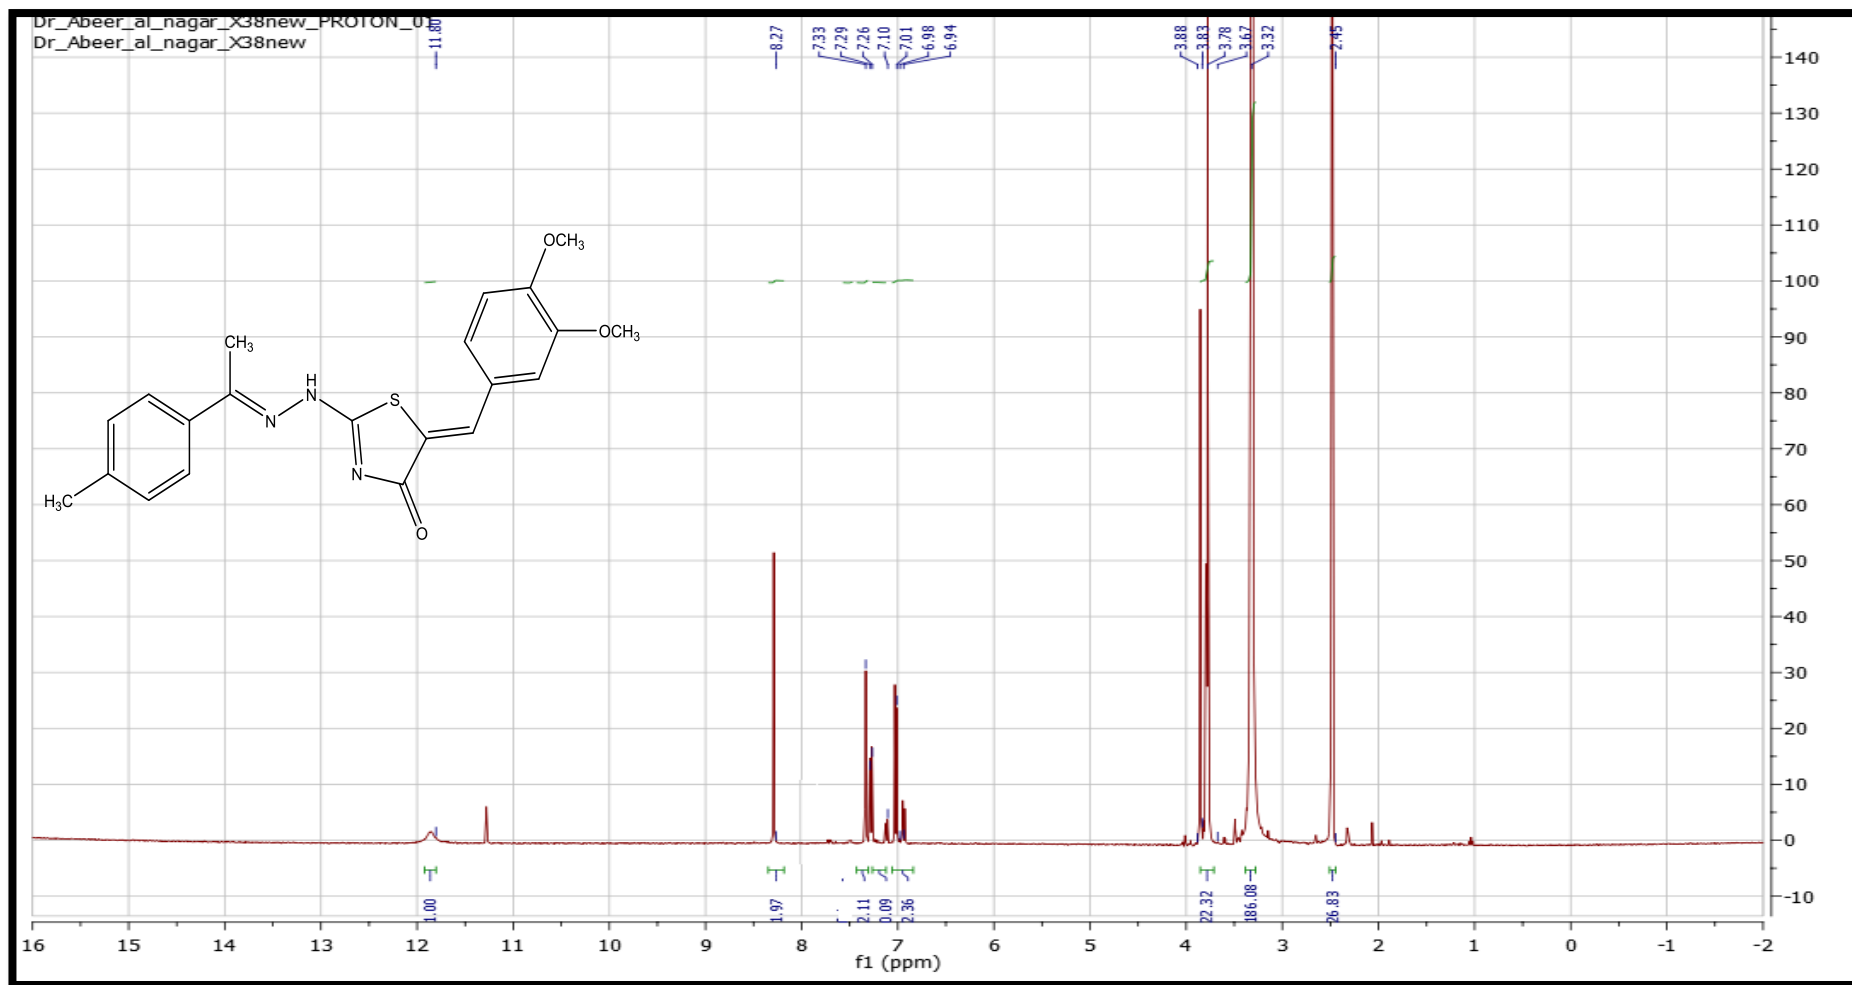

# <sup>1</sup>H NMR of compound (4e)

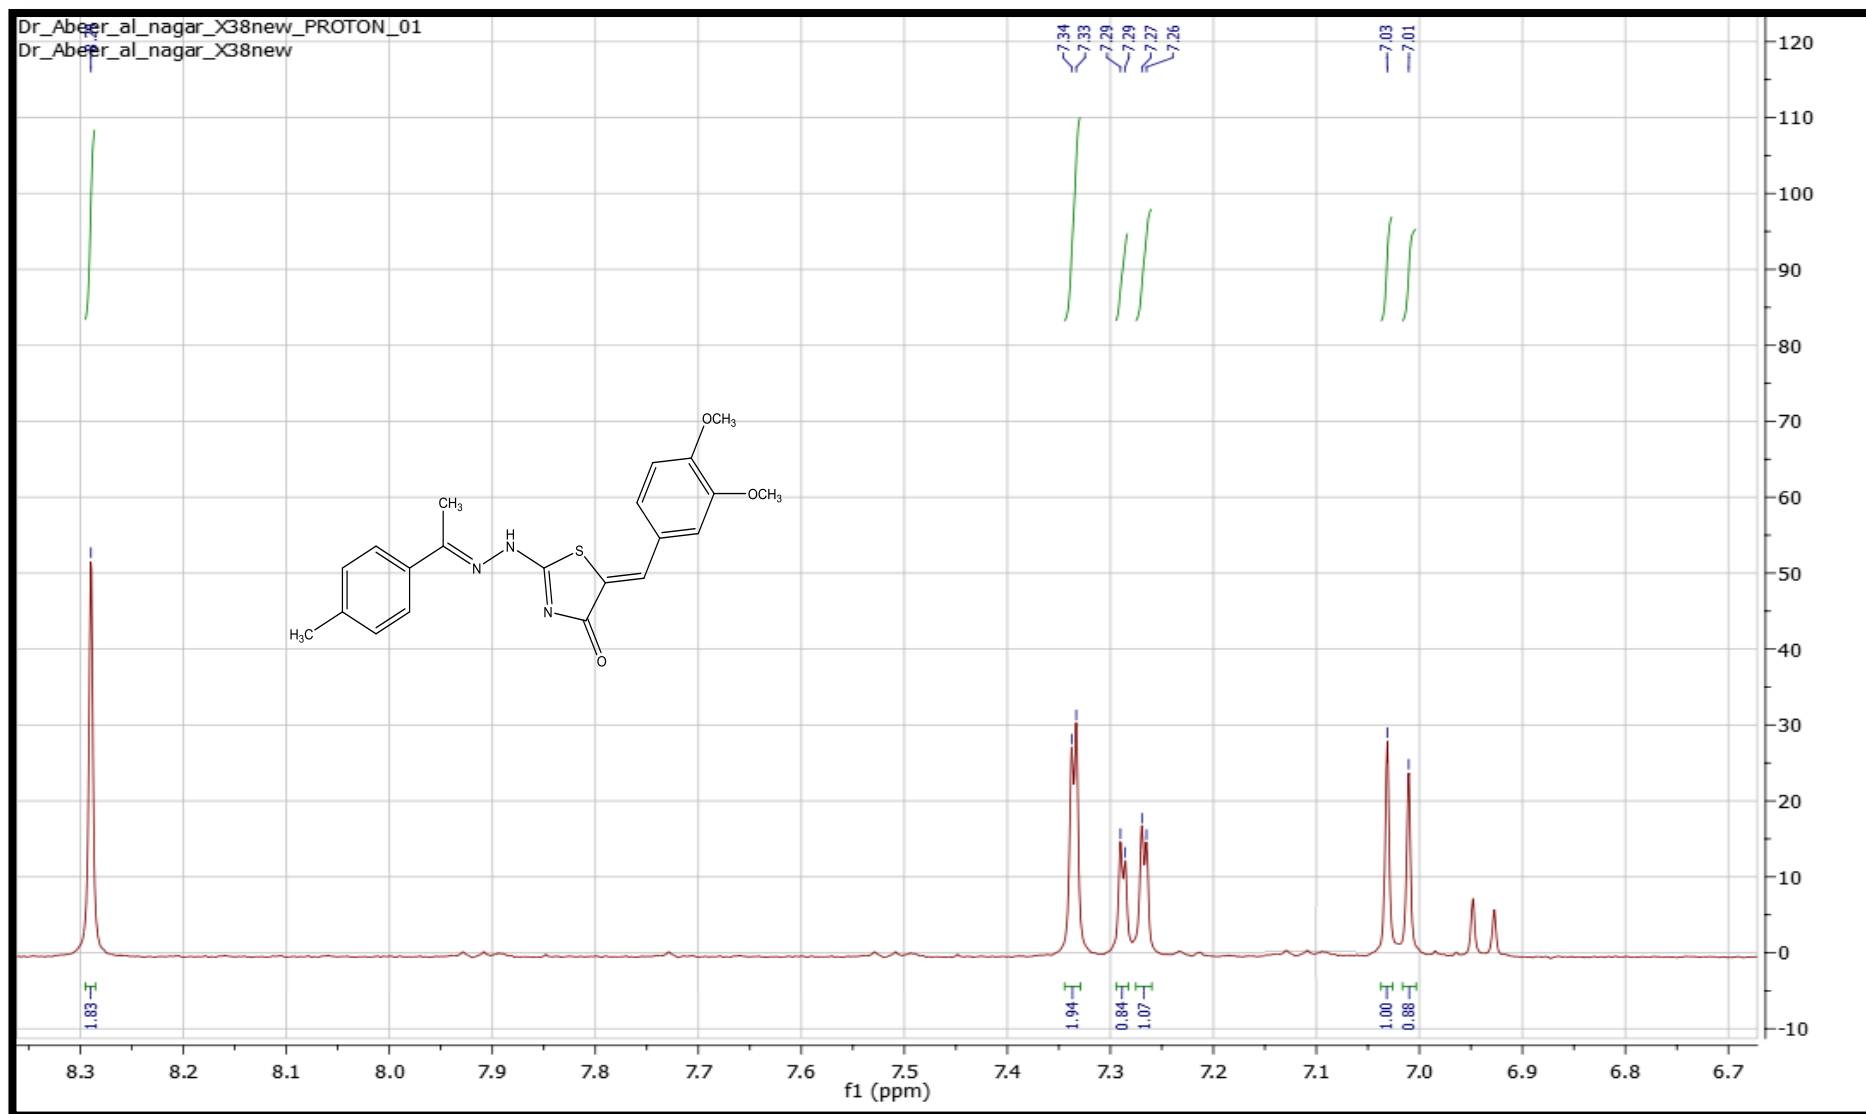

# IR of compound (4f)

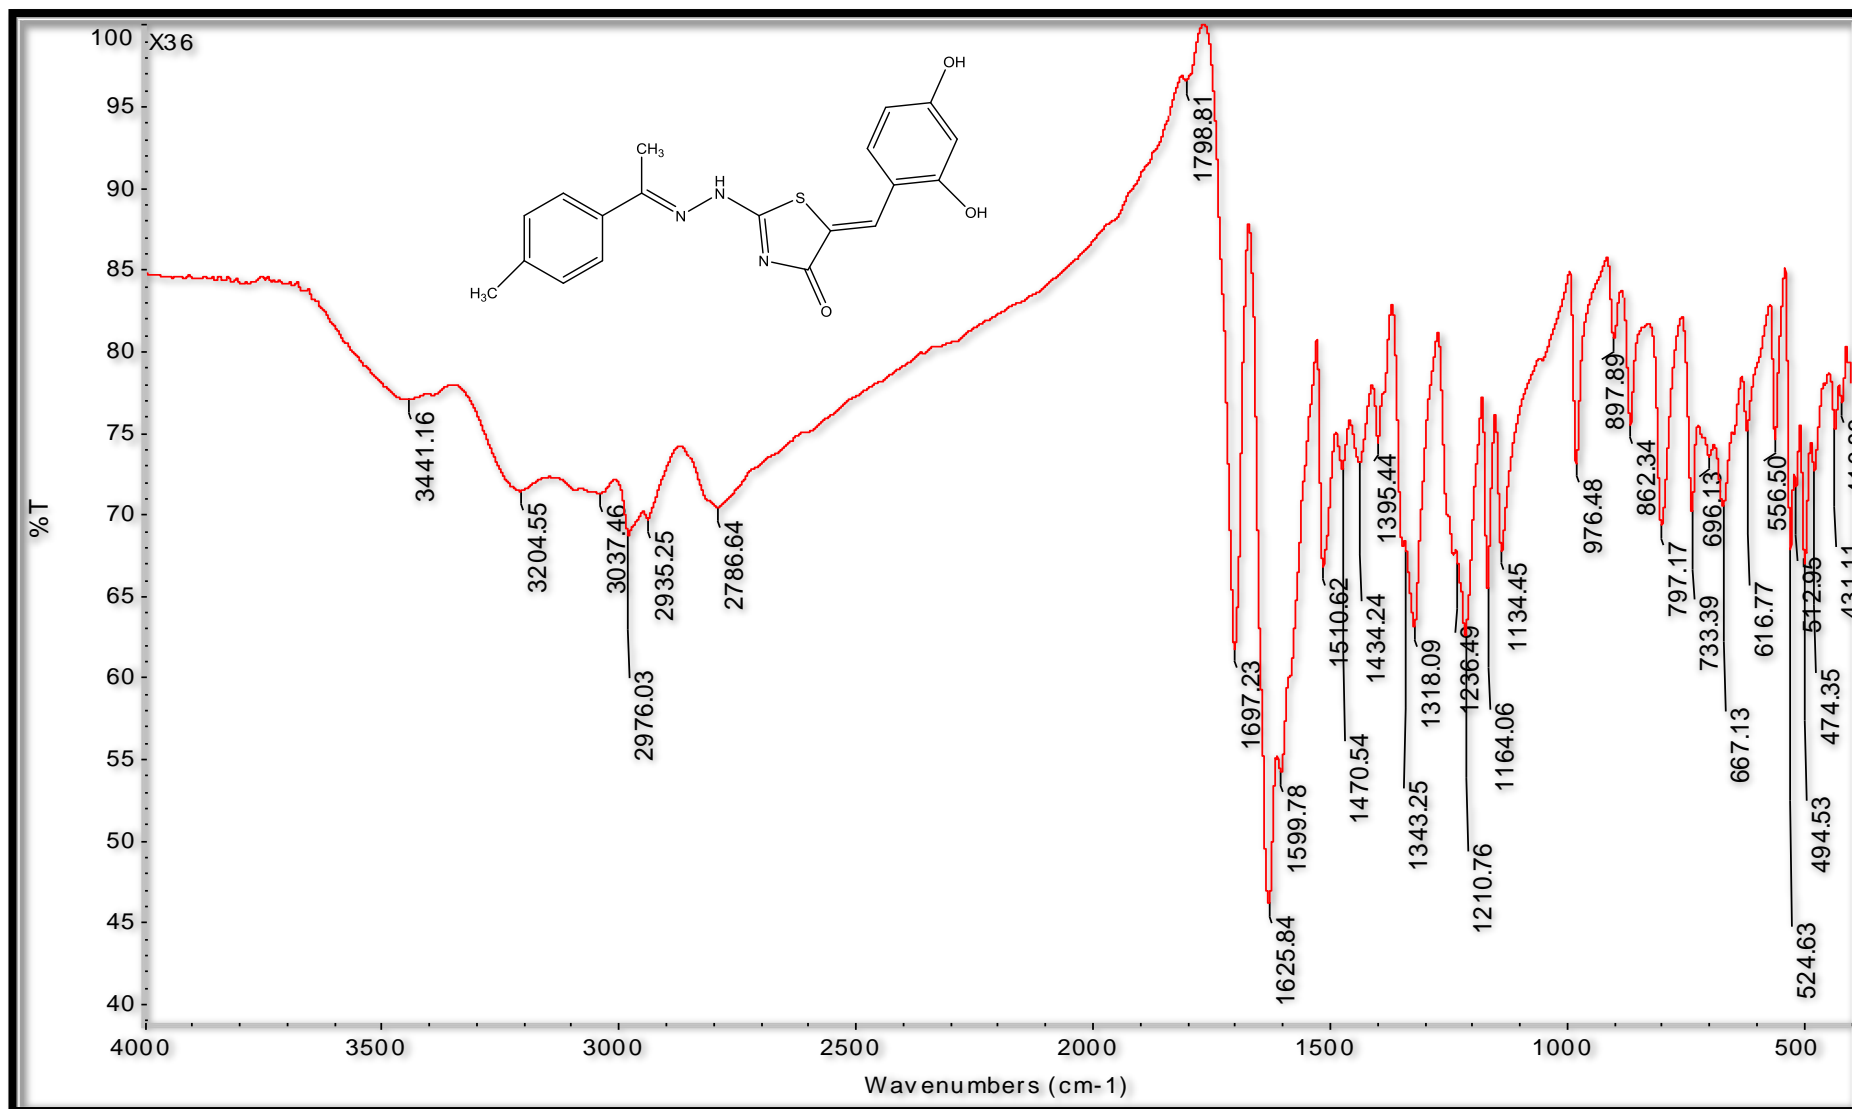

# <sup>1</sup>H NMR of compound (4f)

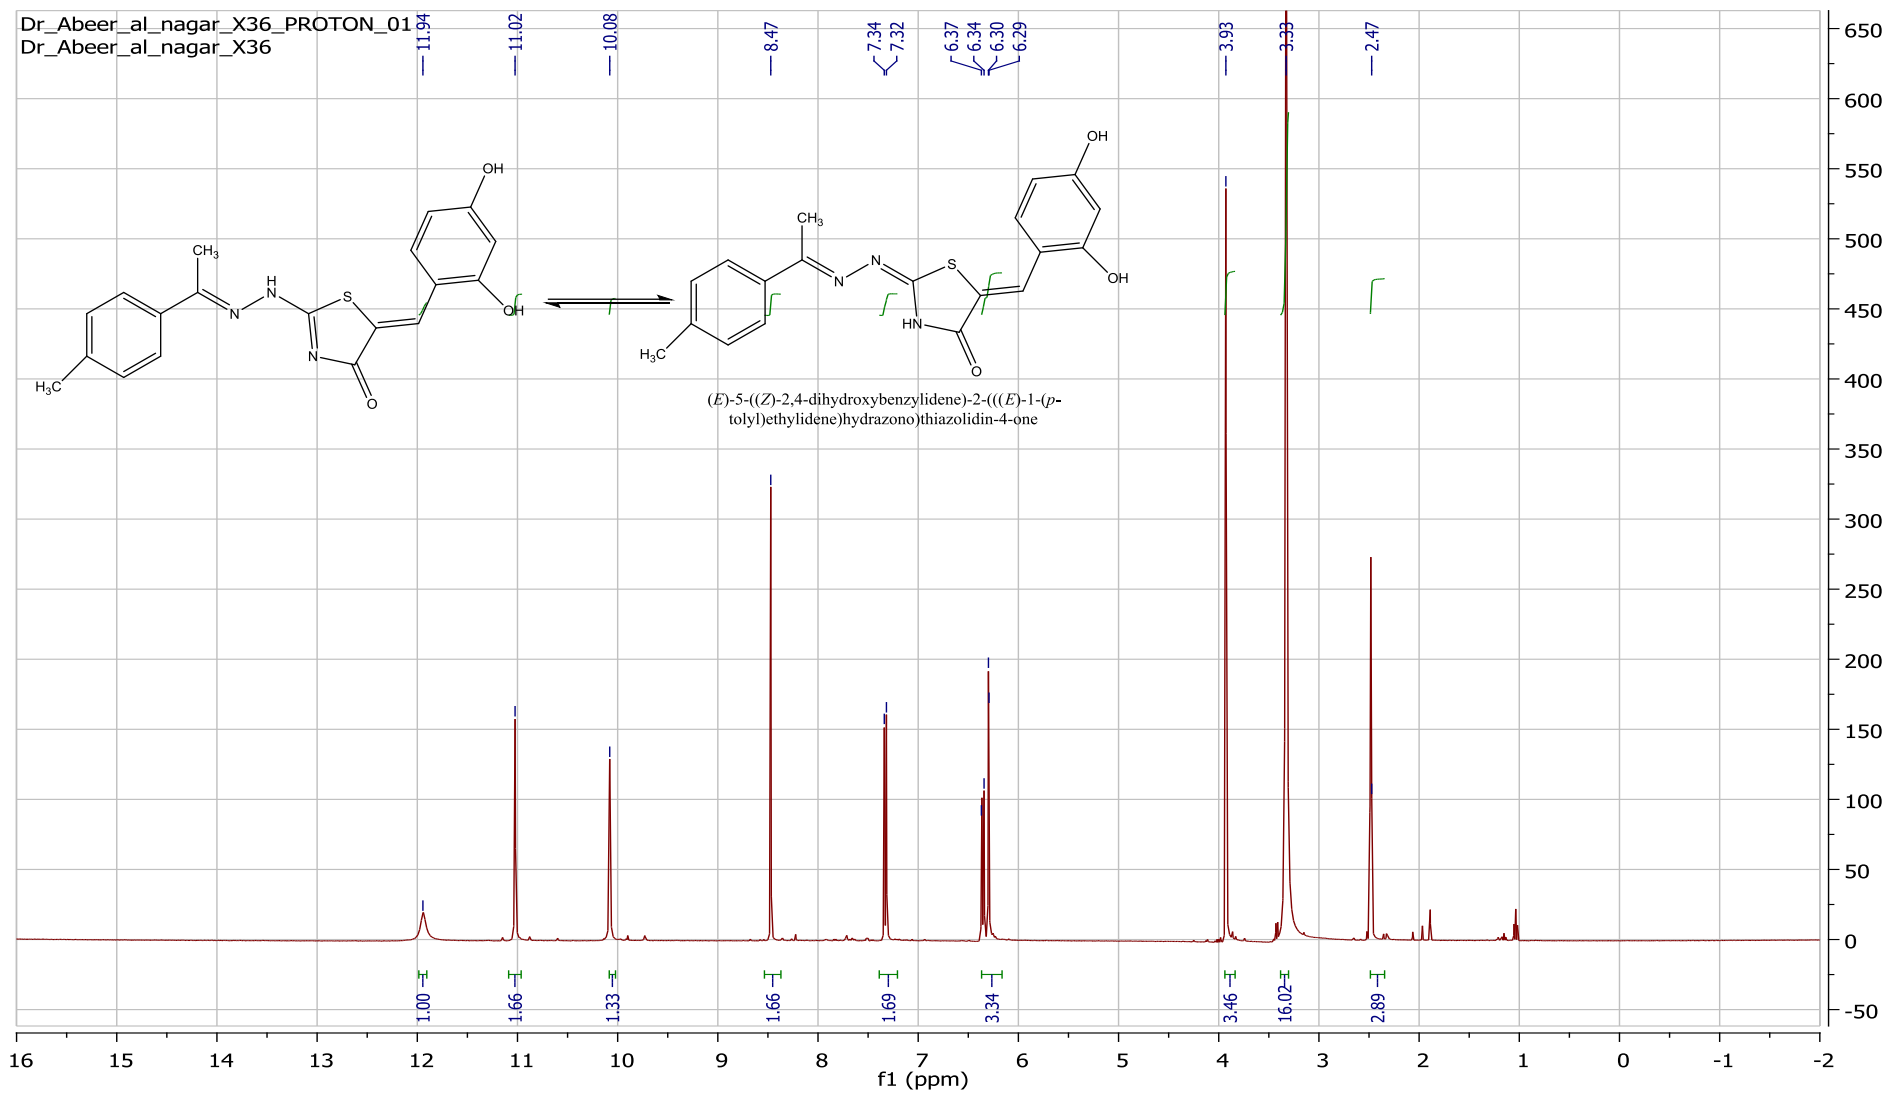

# <sup>1</sup>H NMR of compound (4f)

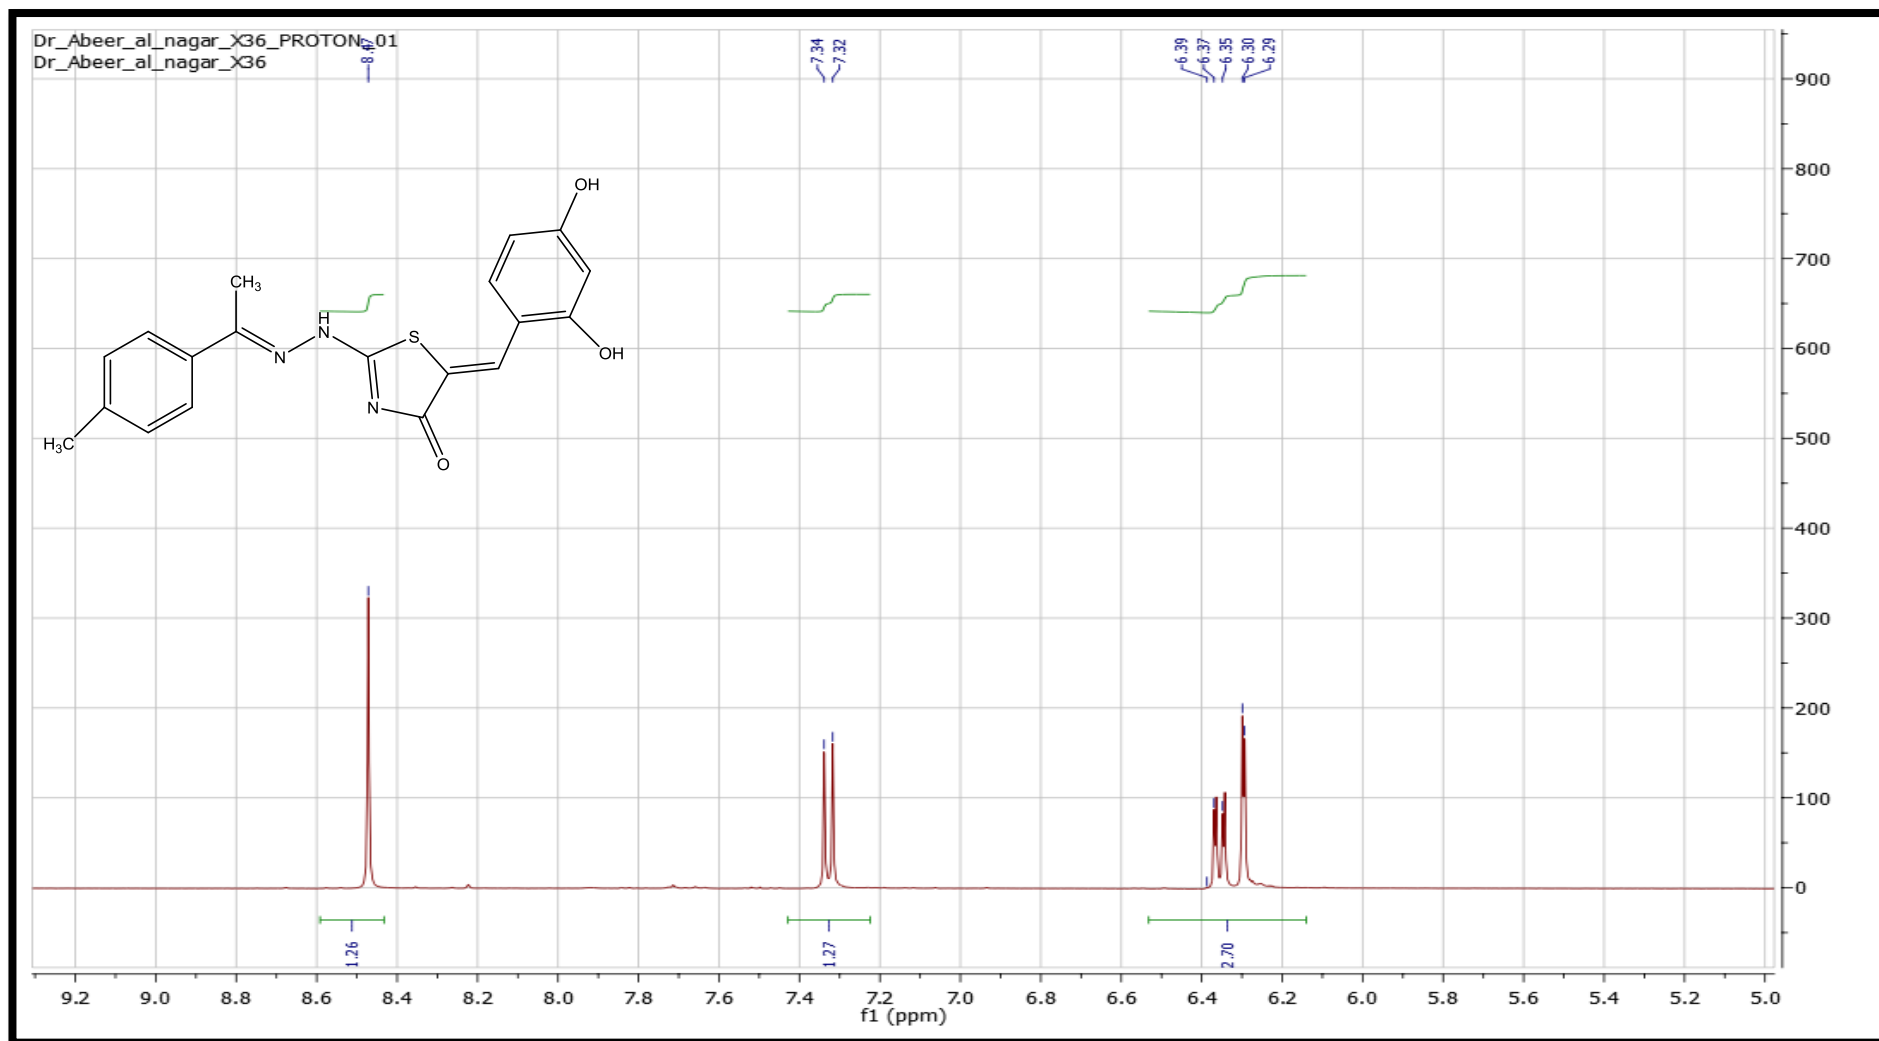

# D<sub>2</sub>O <sup>1</sup>H NMR of compound (4f)

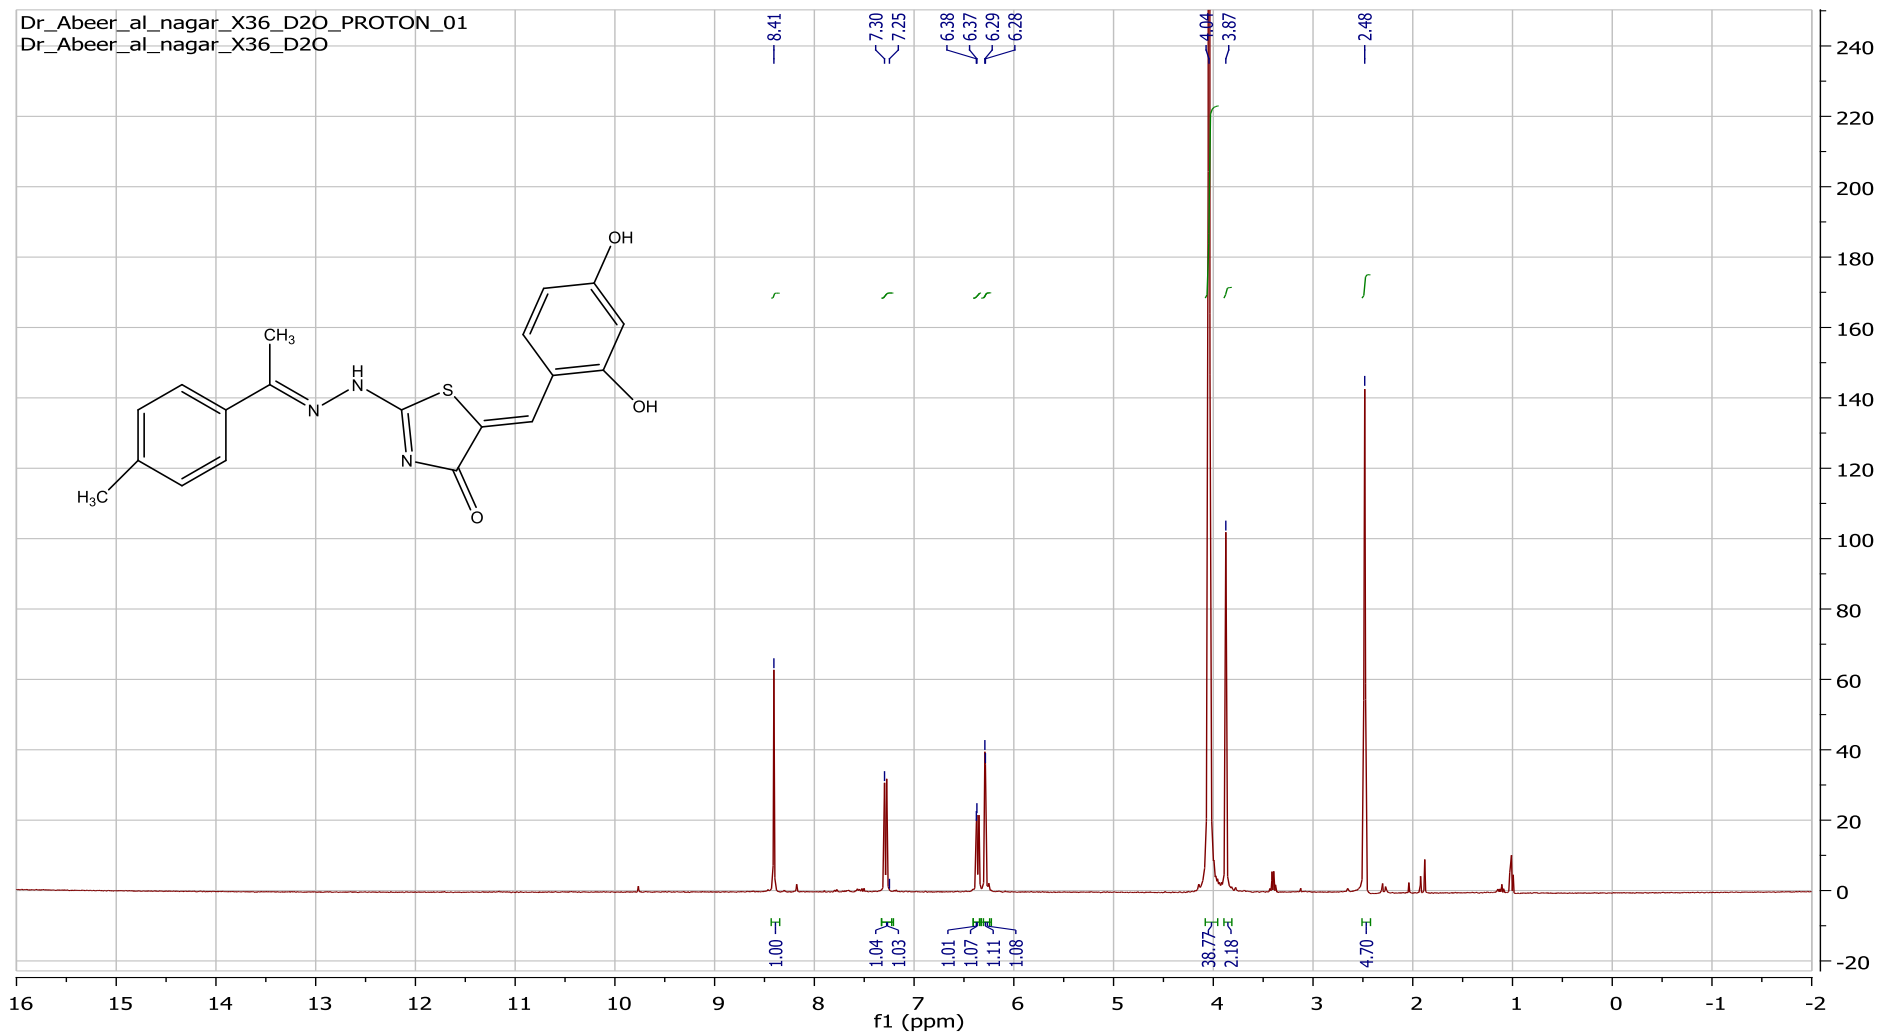

IR of compound (4g).

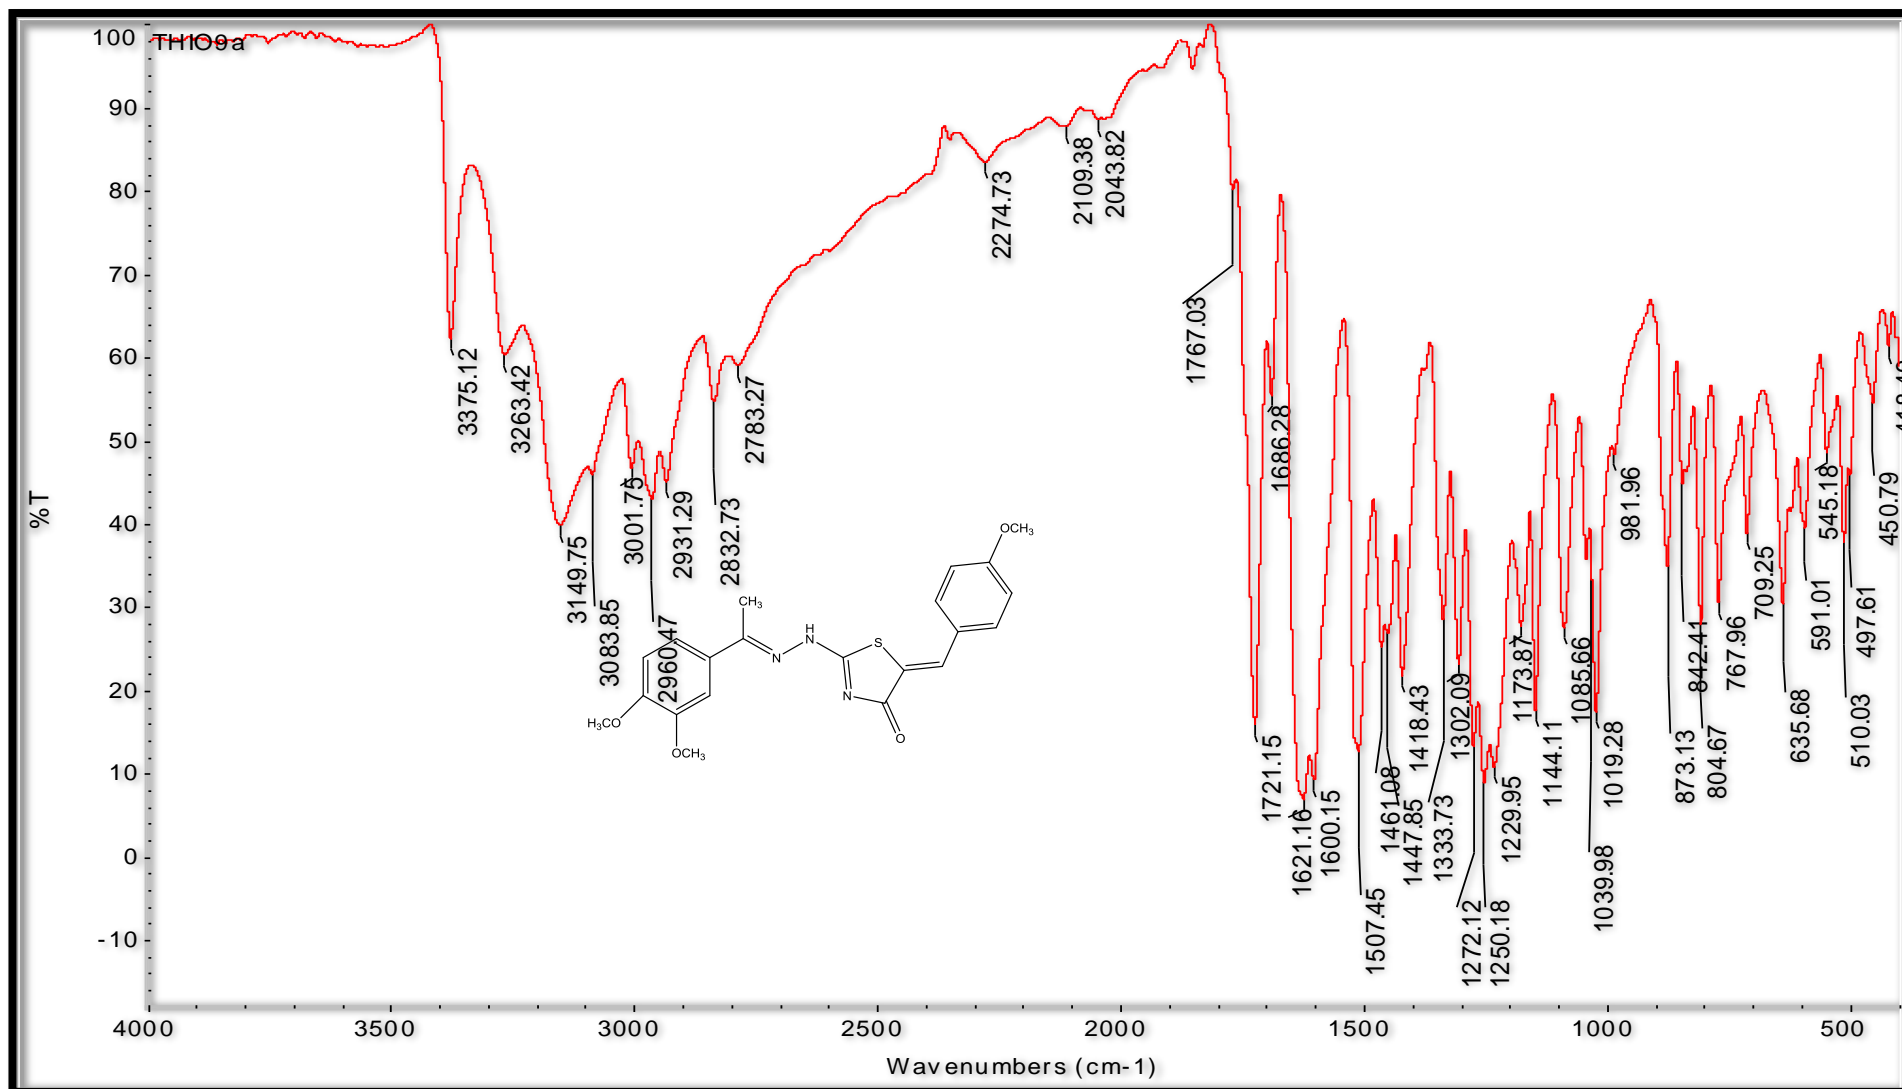



<sup>1</sup>H NMR of compound (4g).

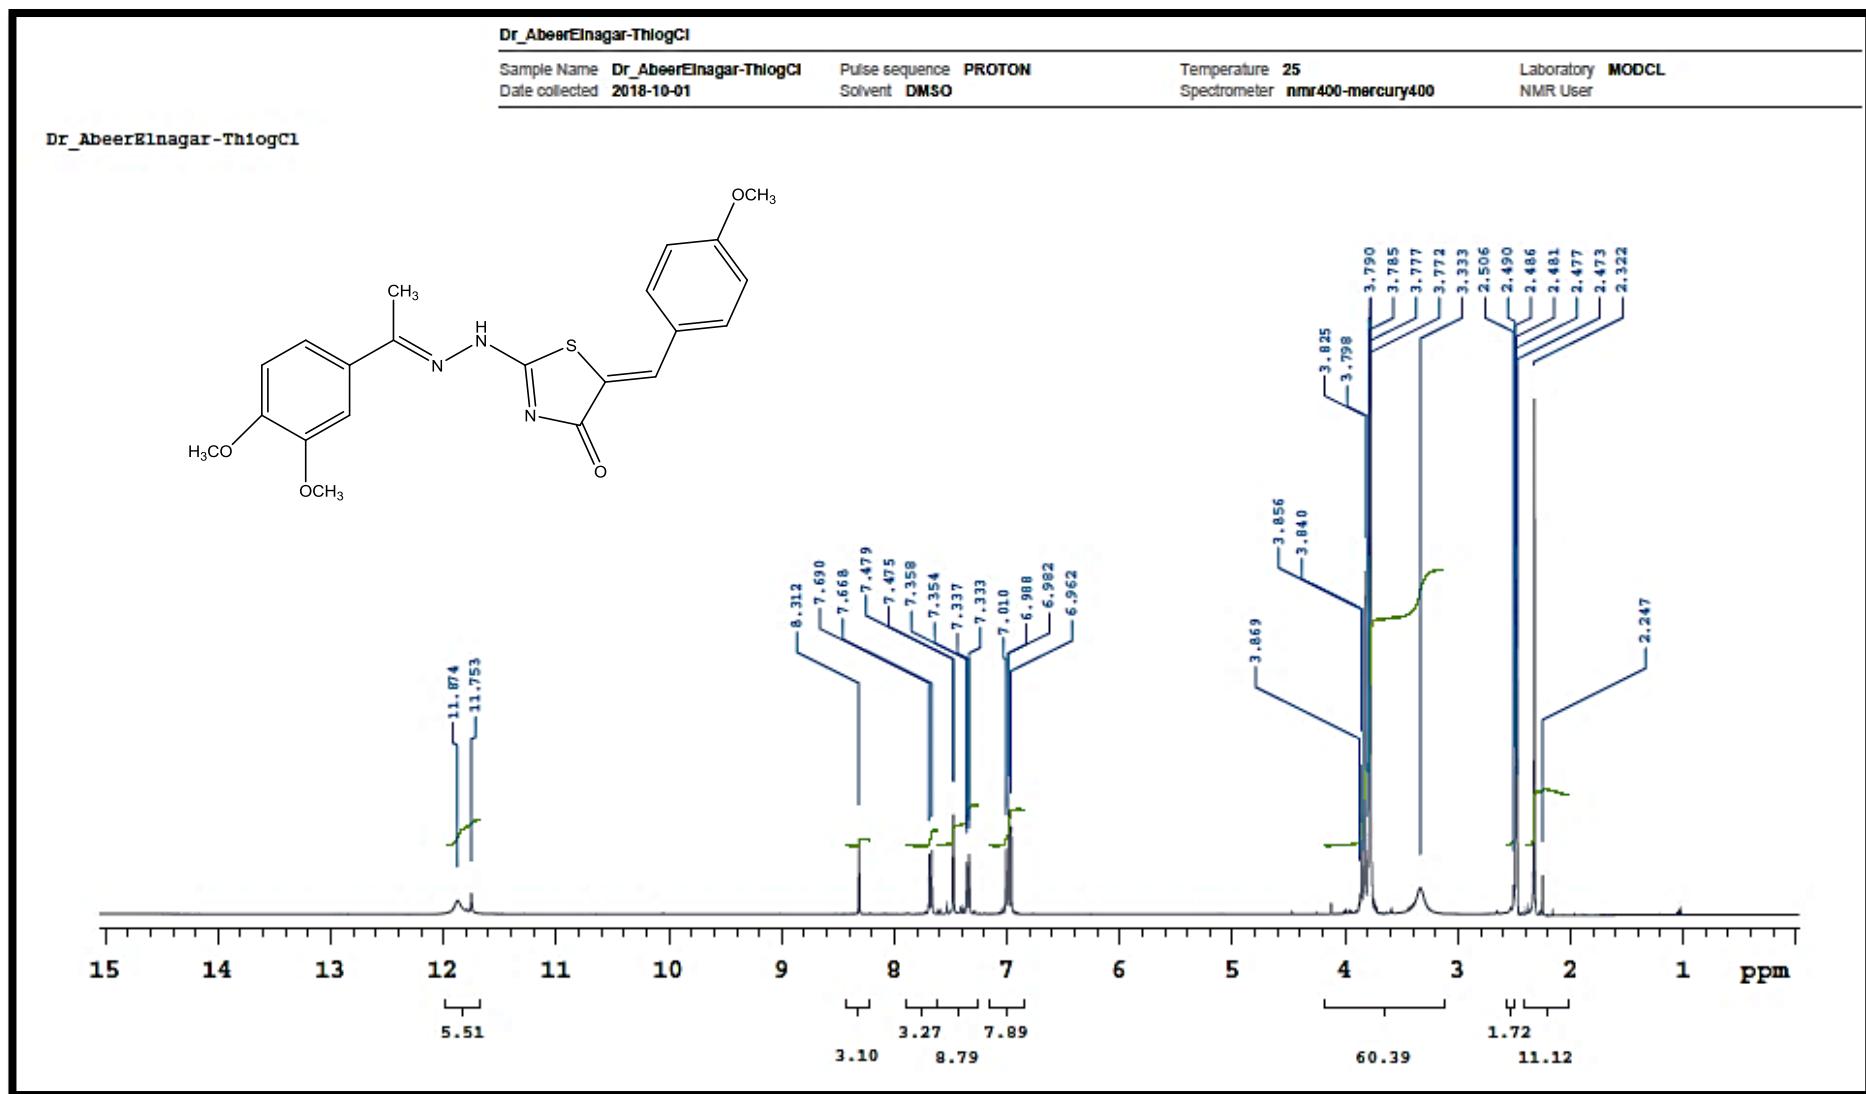

# D<sub>2</sub>O <sup>1</sup>H NMR of compound (4g)

Dr\_AbeerElmagar-ThiogCl-D2O

Sample Name **Dr\_AbeerElmagar-ThiogCl-D2O** Pulse sequence **PROTON**  
Date collected **2018-10-02** Solvent **DMSO**

Temperature **25**  
Spectrometer **nmr400-mercury400**

Laboratory **MODCL**  
NMR User **sameeh\_Albadawy**

Dr\_AbeerElmagar-ThiogCl-D2O

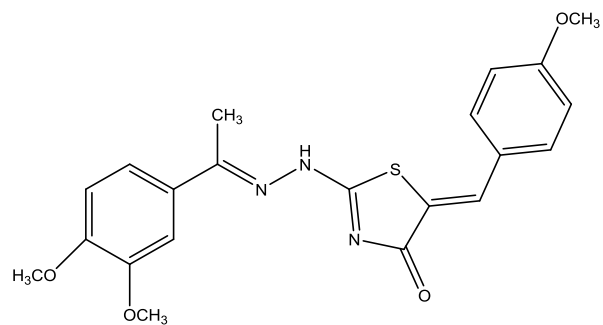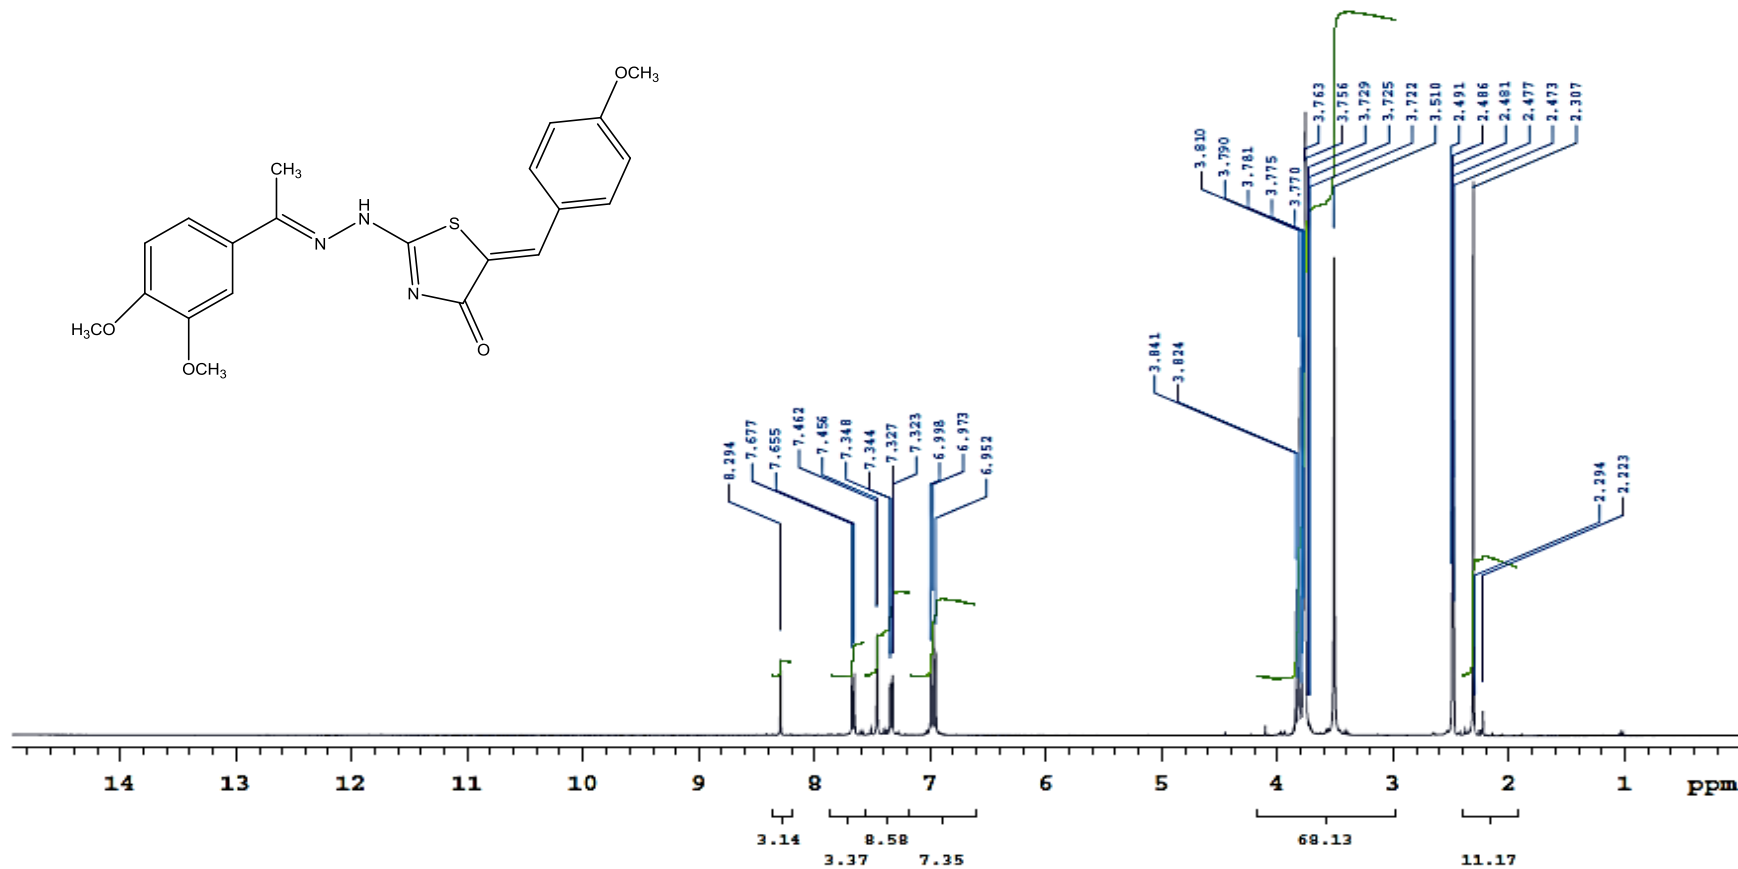

IR of compound (4h).

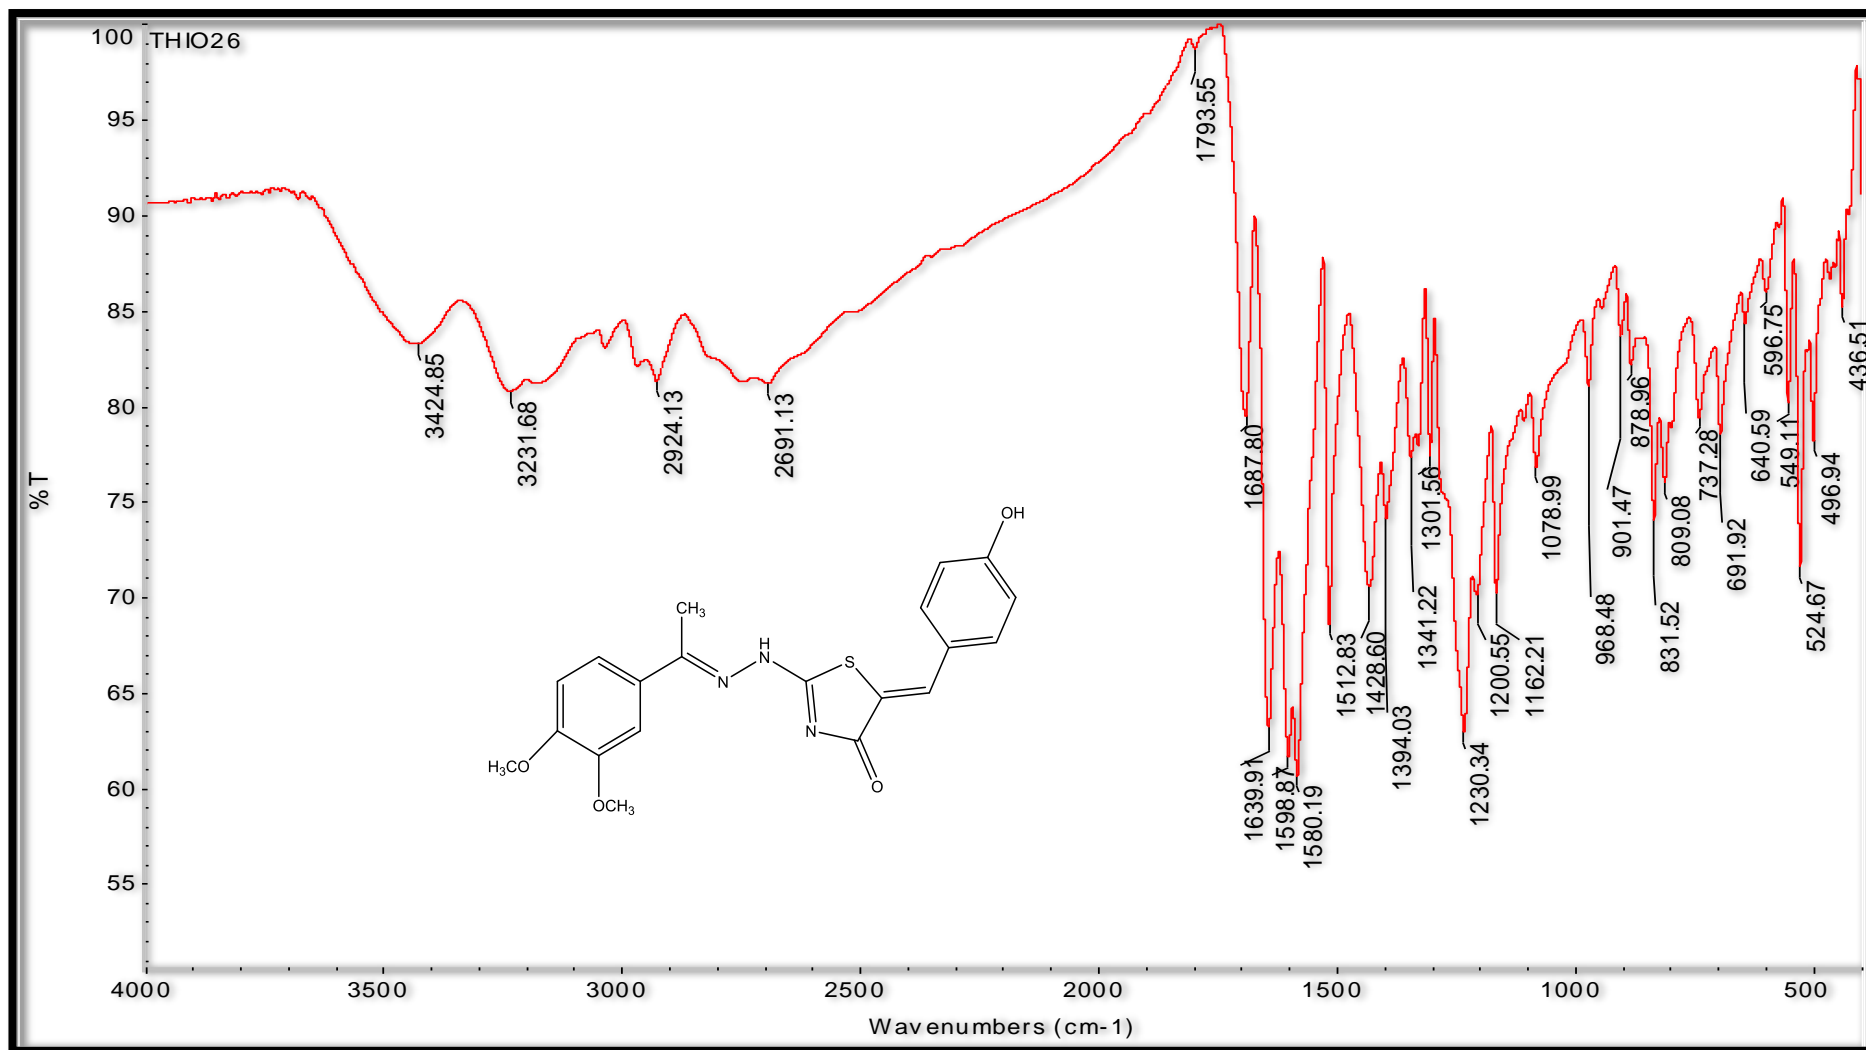

# <sup>1</sup>H NMR of compound (4h)

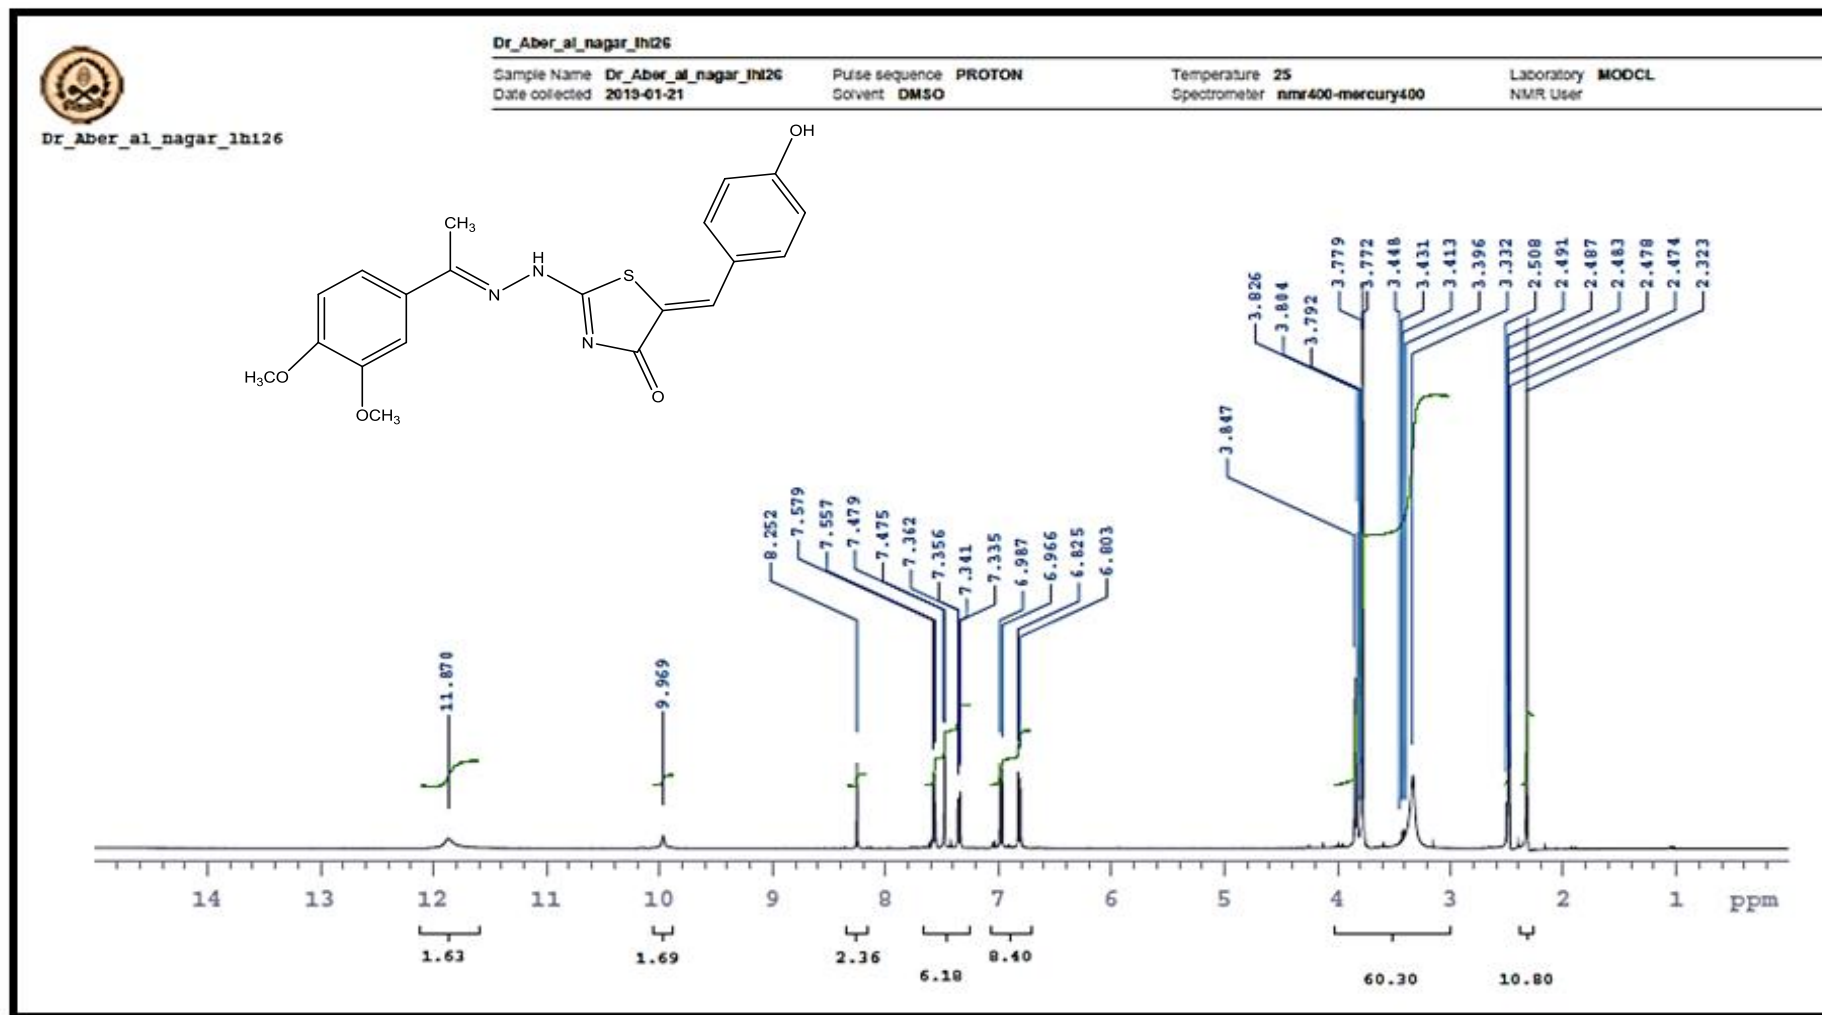

OH

# D<sub>2</sub>O <sup>1</sup>H NMR of compound (4h)

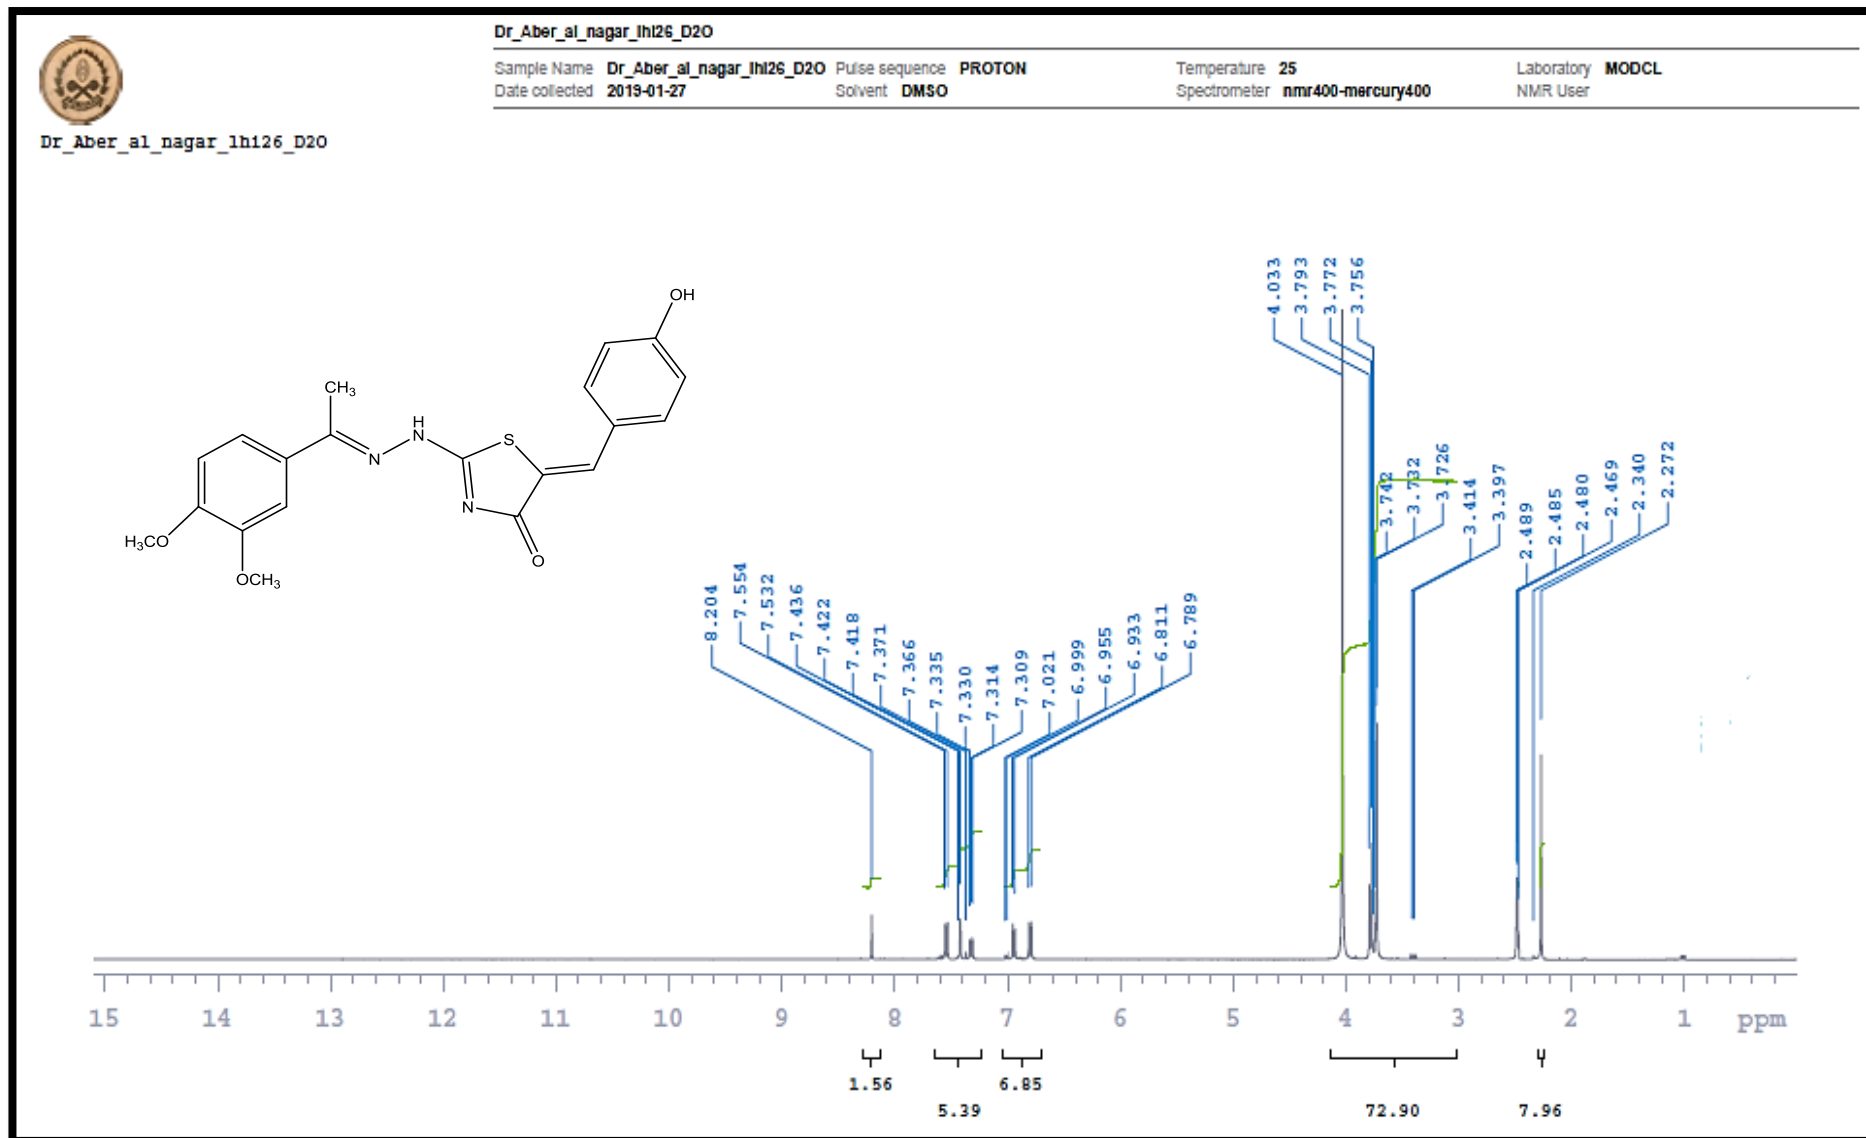

# IR of compound (4i)

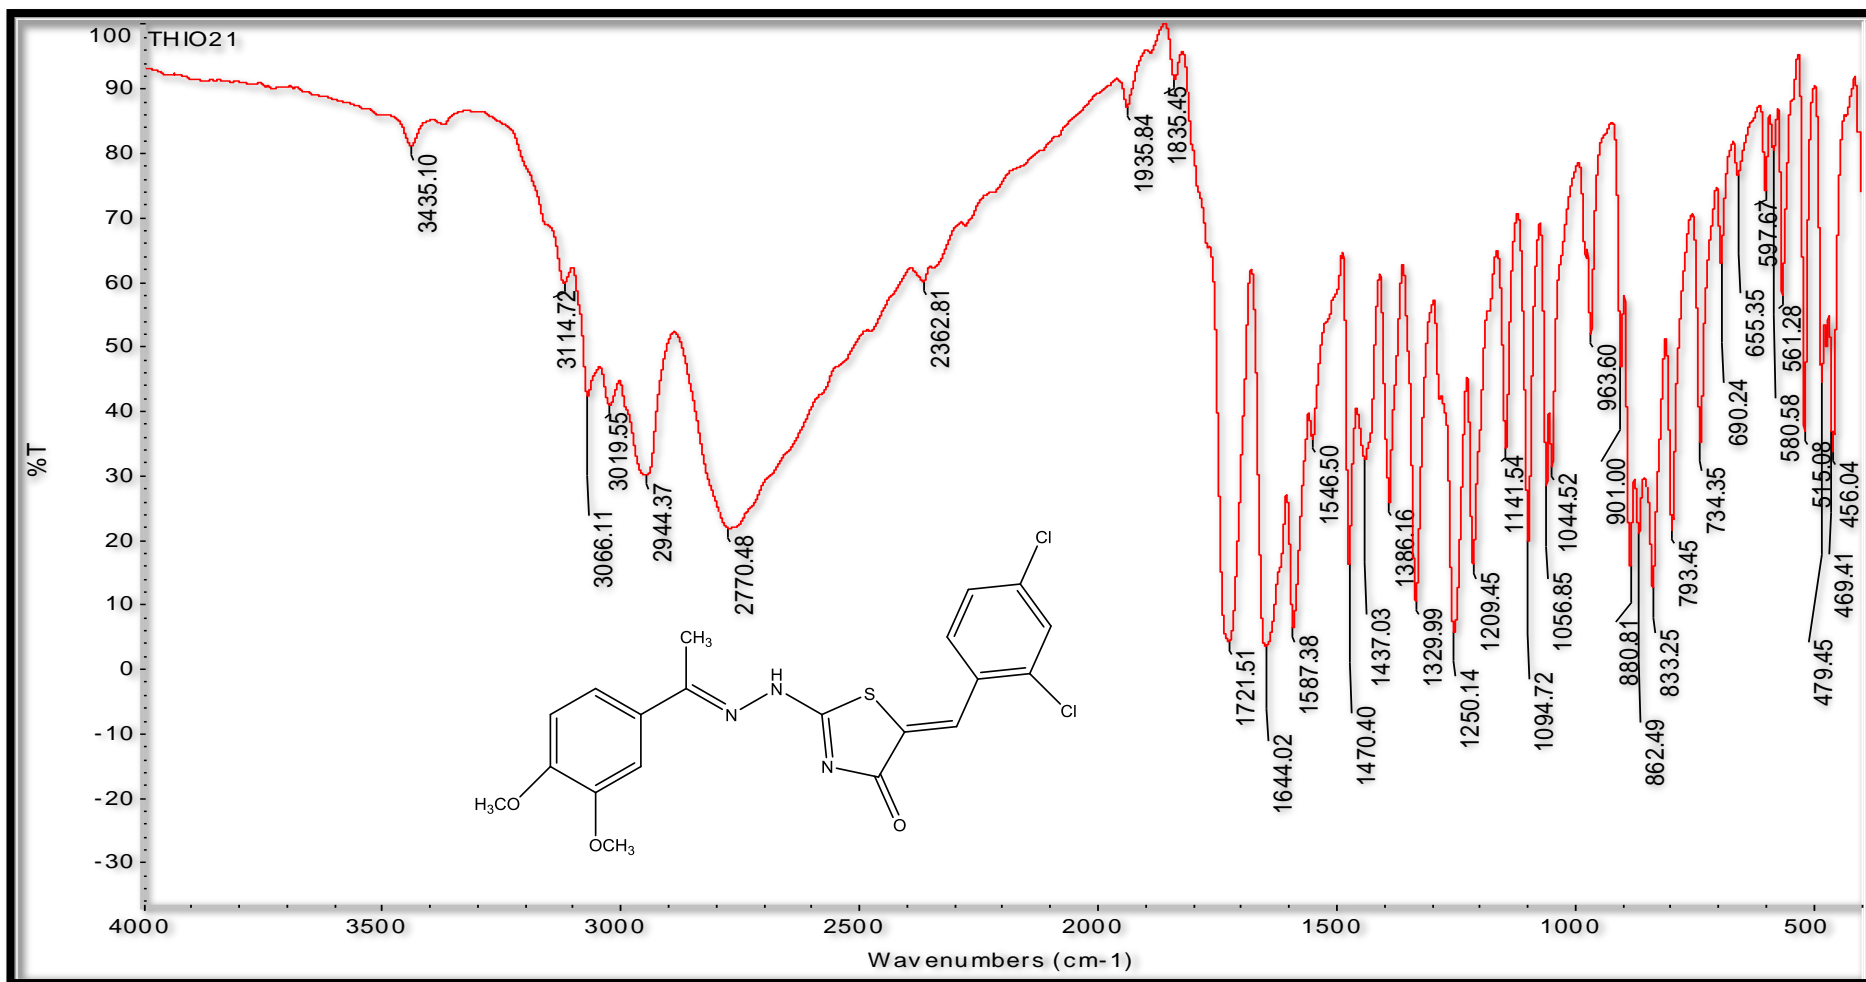

# <sup>1</sup>H NMR of compound (4i)

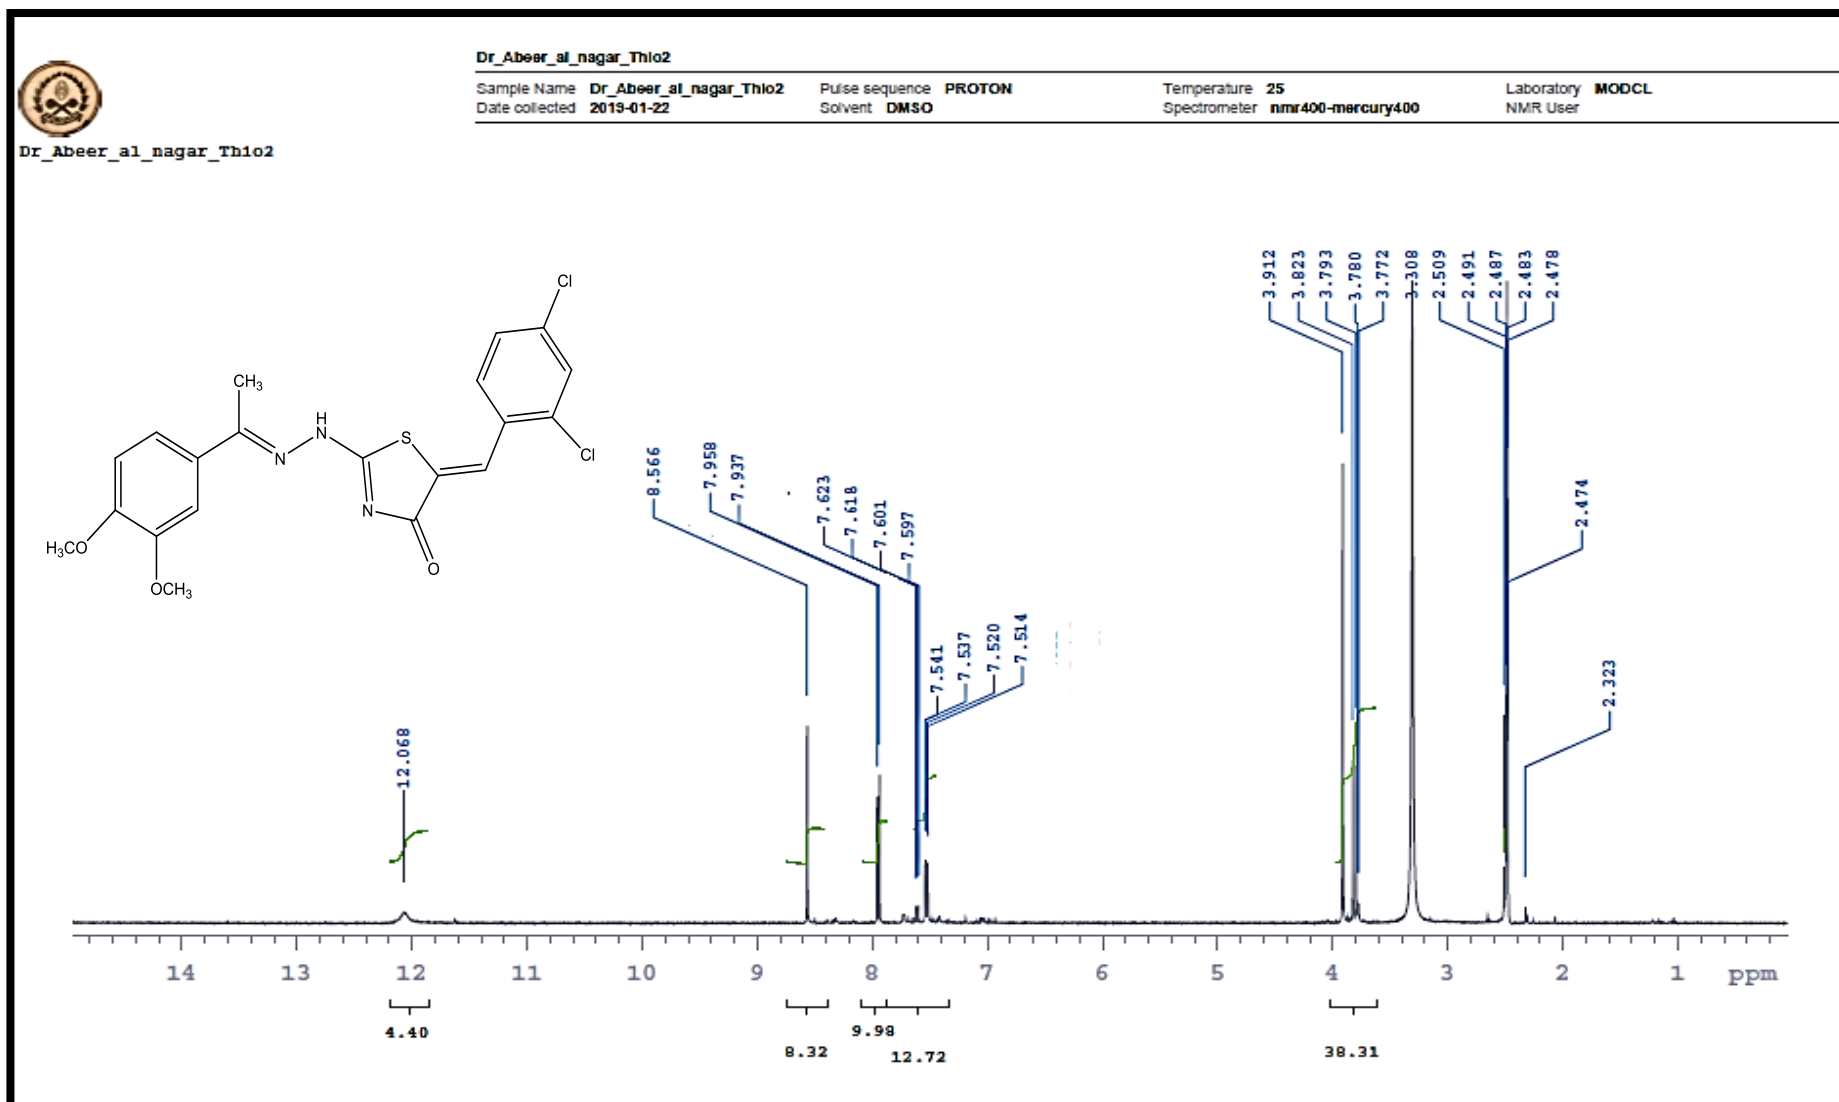

# IR of compound (4j)

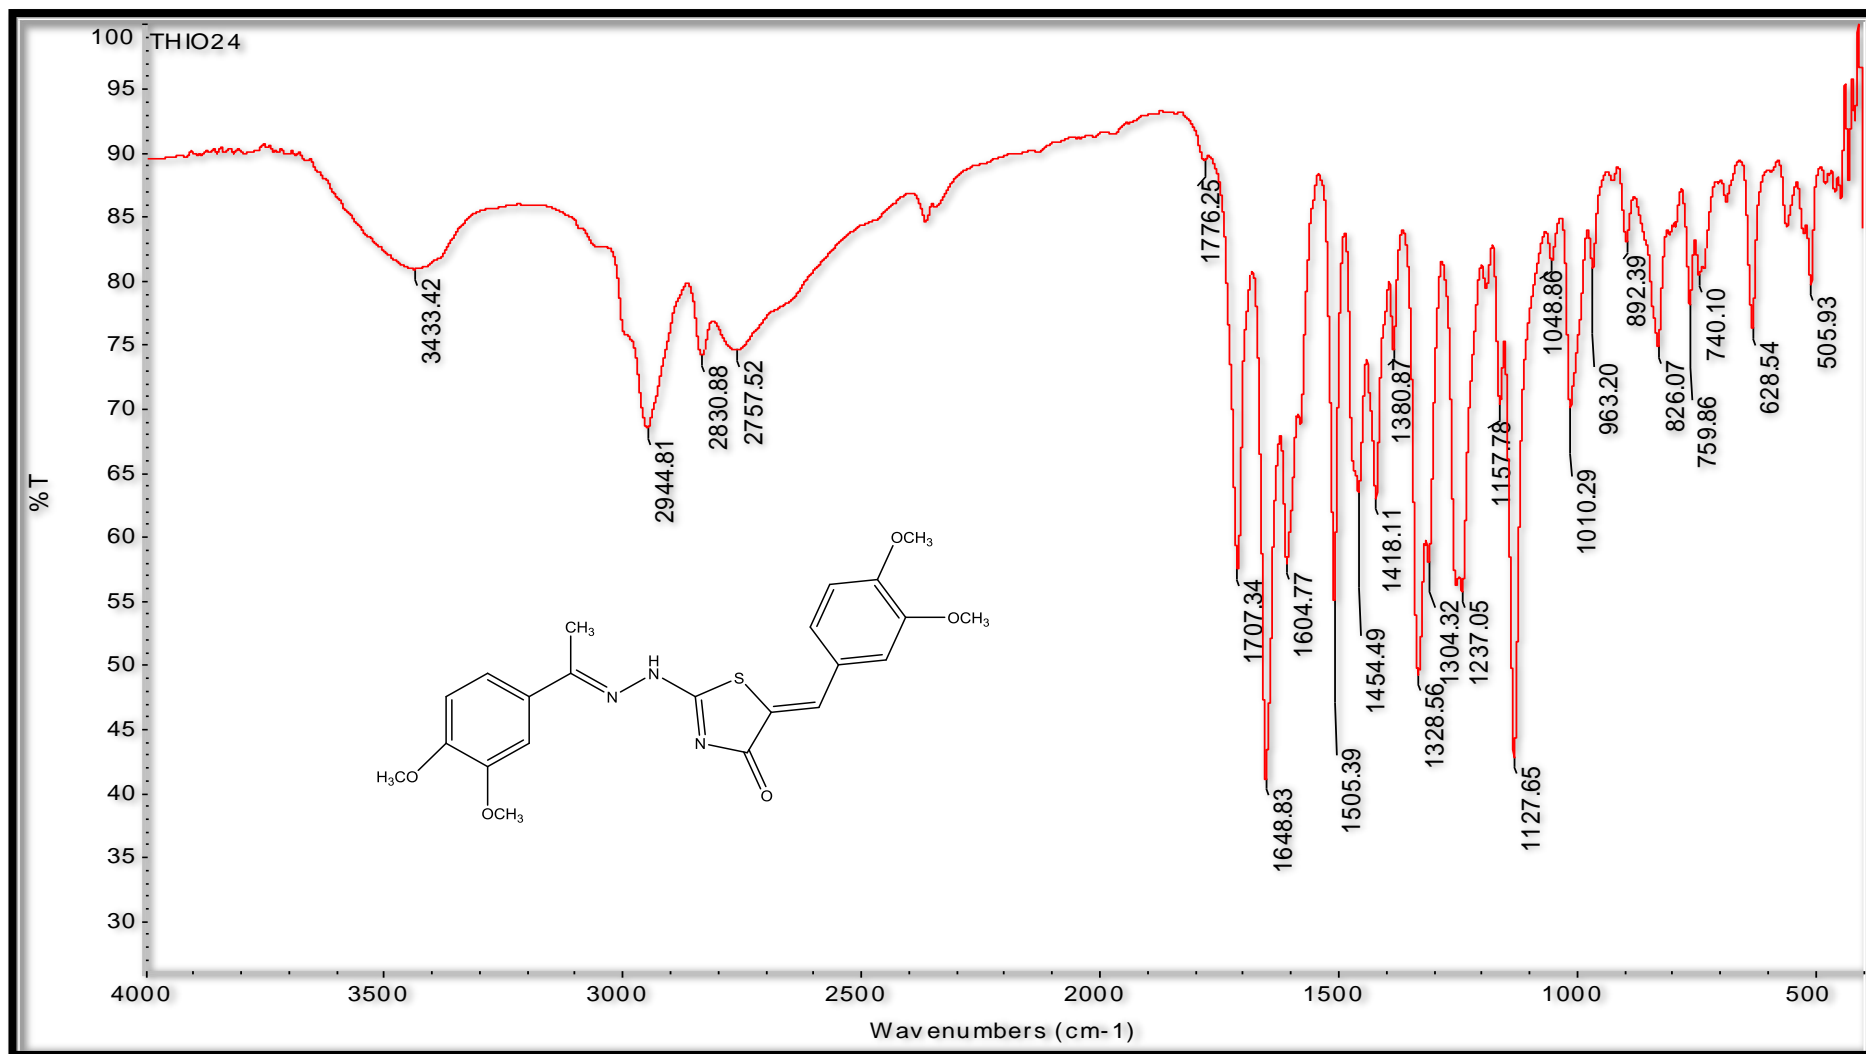



# <sup>1</sup>H NMR of compound (4j)

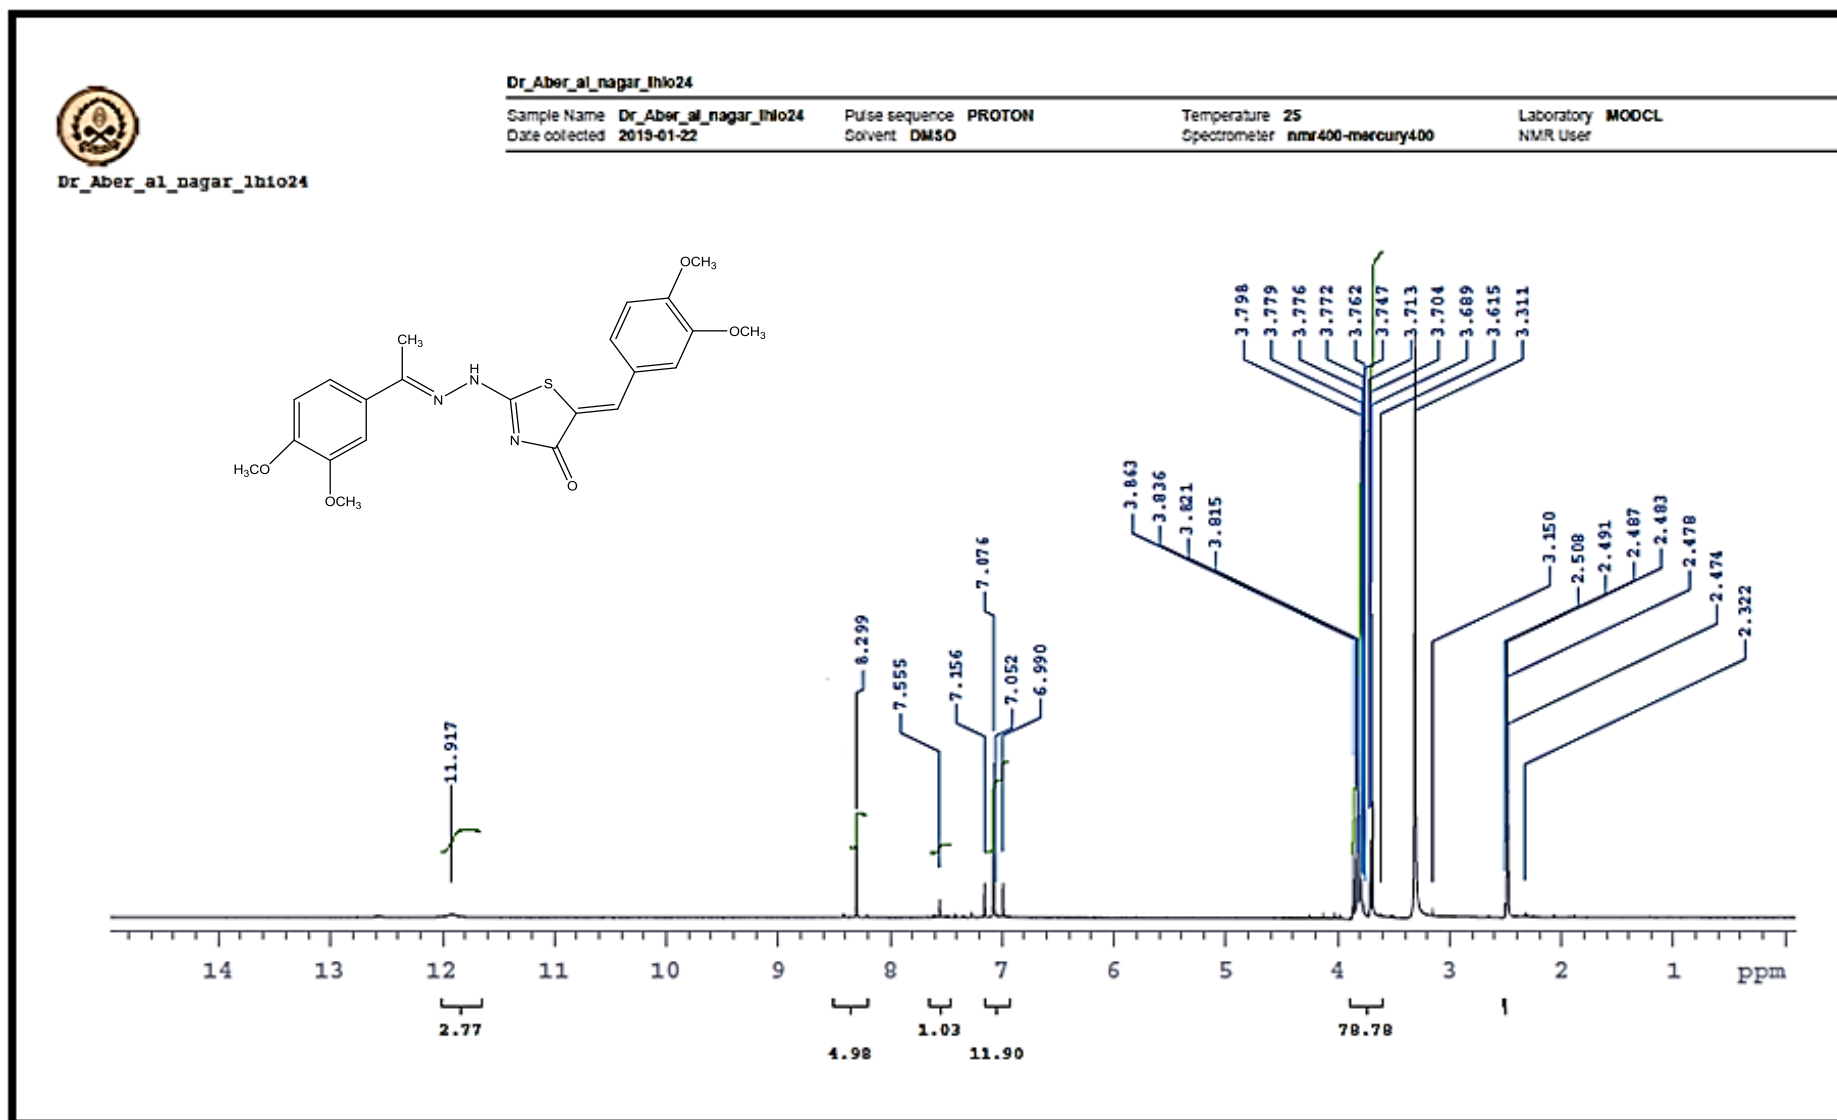

# D<sub>2</sub>O <sup>1</sup>H NMR of compound(4j)

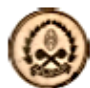

Dr\_Aber\_al\_nagar\_1h1o24\_D2O

Dr\_Aber\_al\_nagar\_1h1o24\_D2O

Sample Name Dr\_Aber\_al\_nagar\_1h1o24\_D2O  
Date collected 2019-01-27

Pulse sequence PROTON  
Solvent DMSO

Temperature 25  
Spectrometer nmr400-mercury400

Laboratory MODCL  
NMR User Cap-Ahmed Salah Elkholy

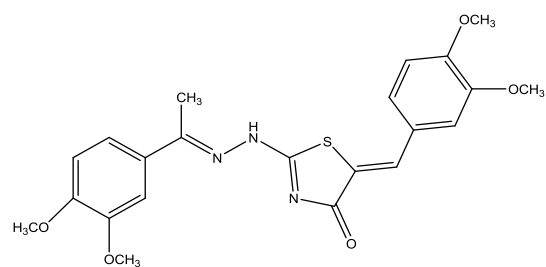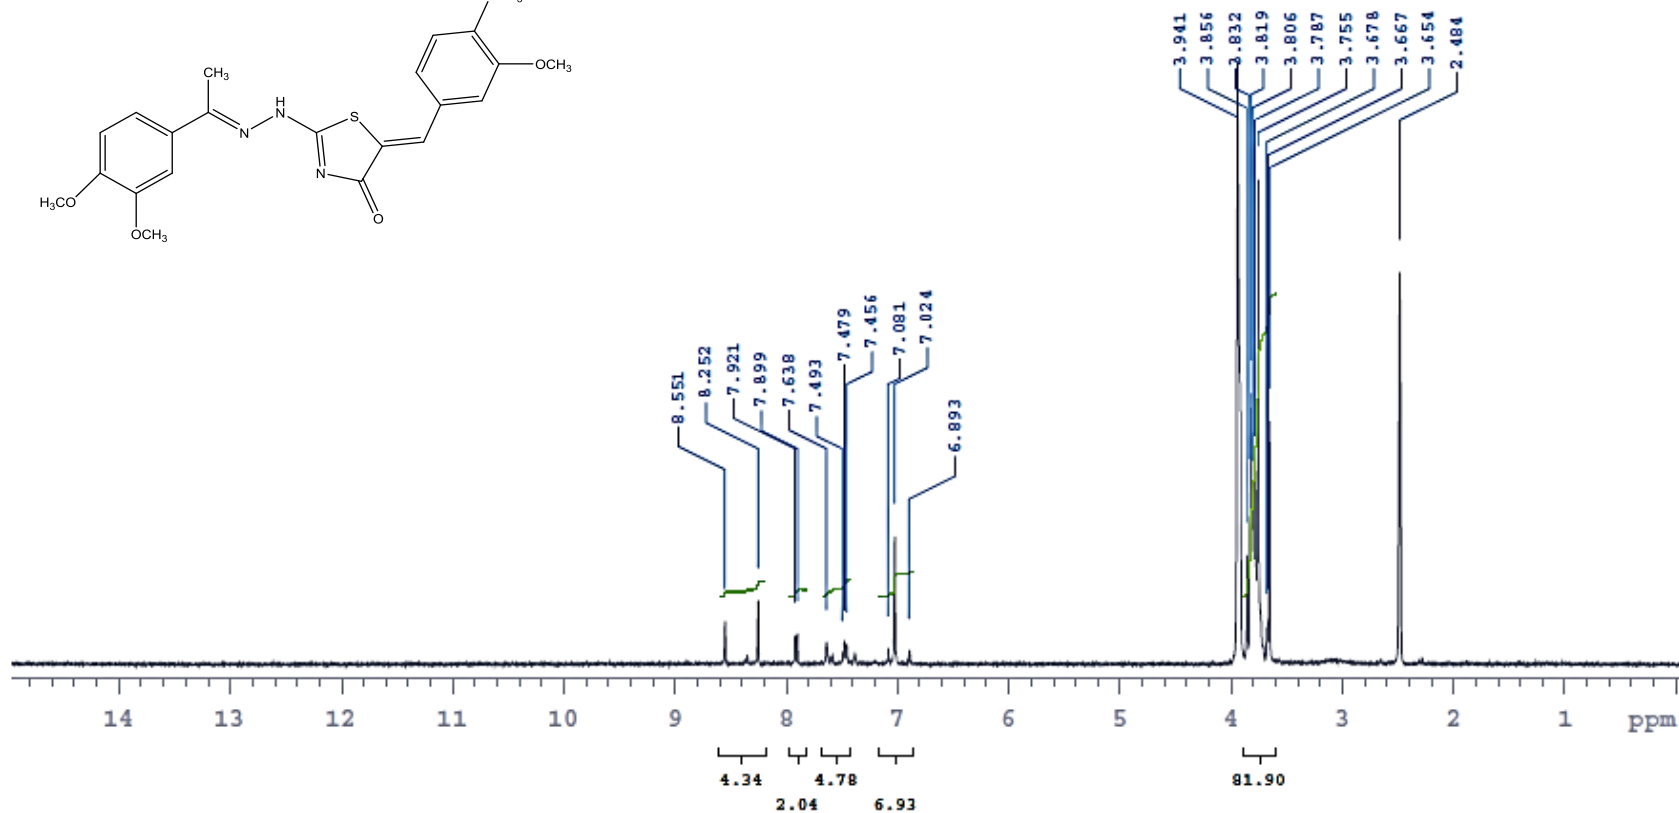

# IR of compound (4k)

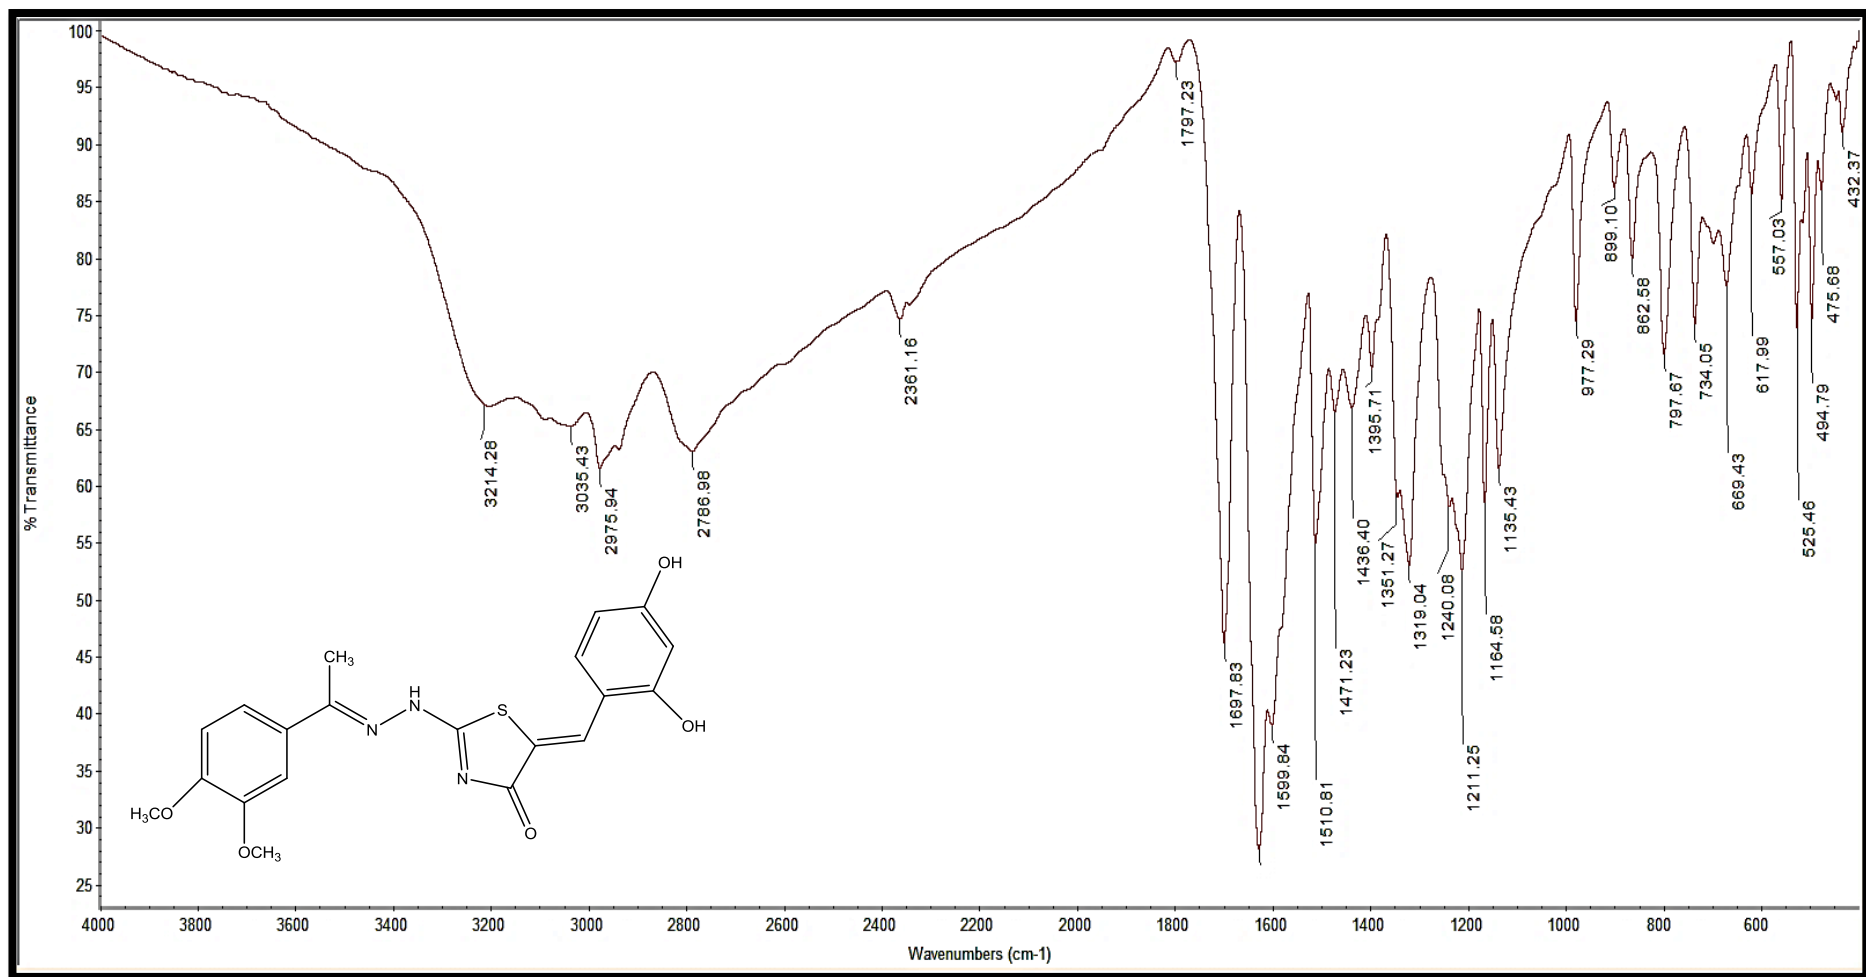

# <sup>1</sup>H NMR of compound (4k)

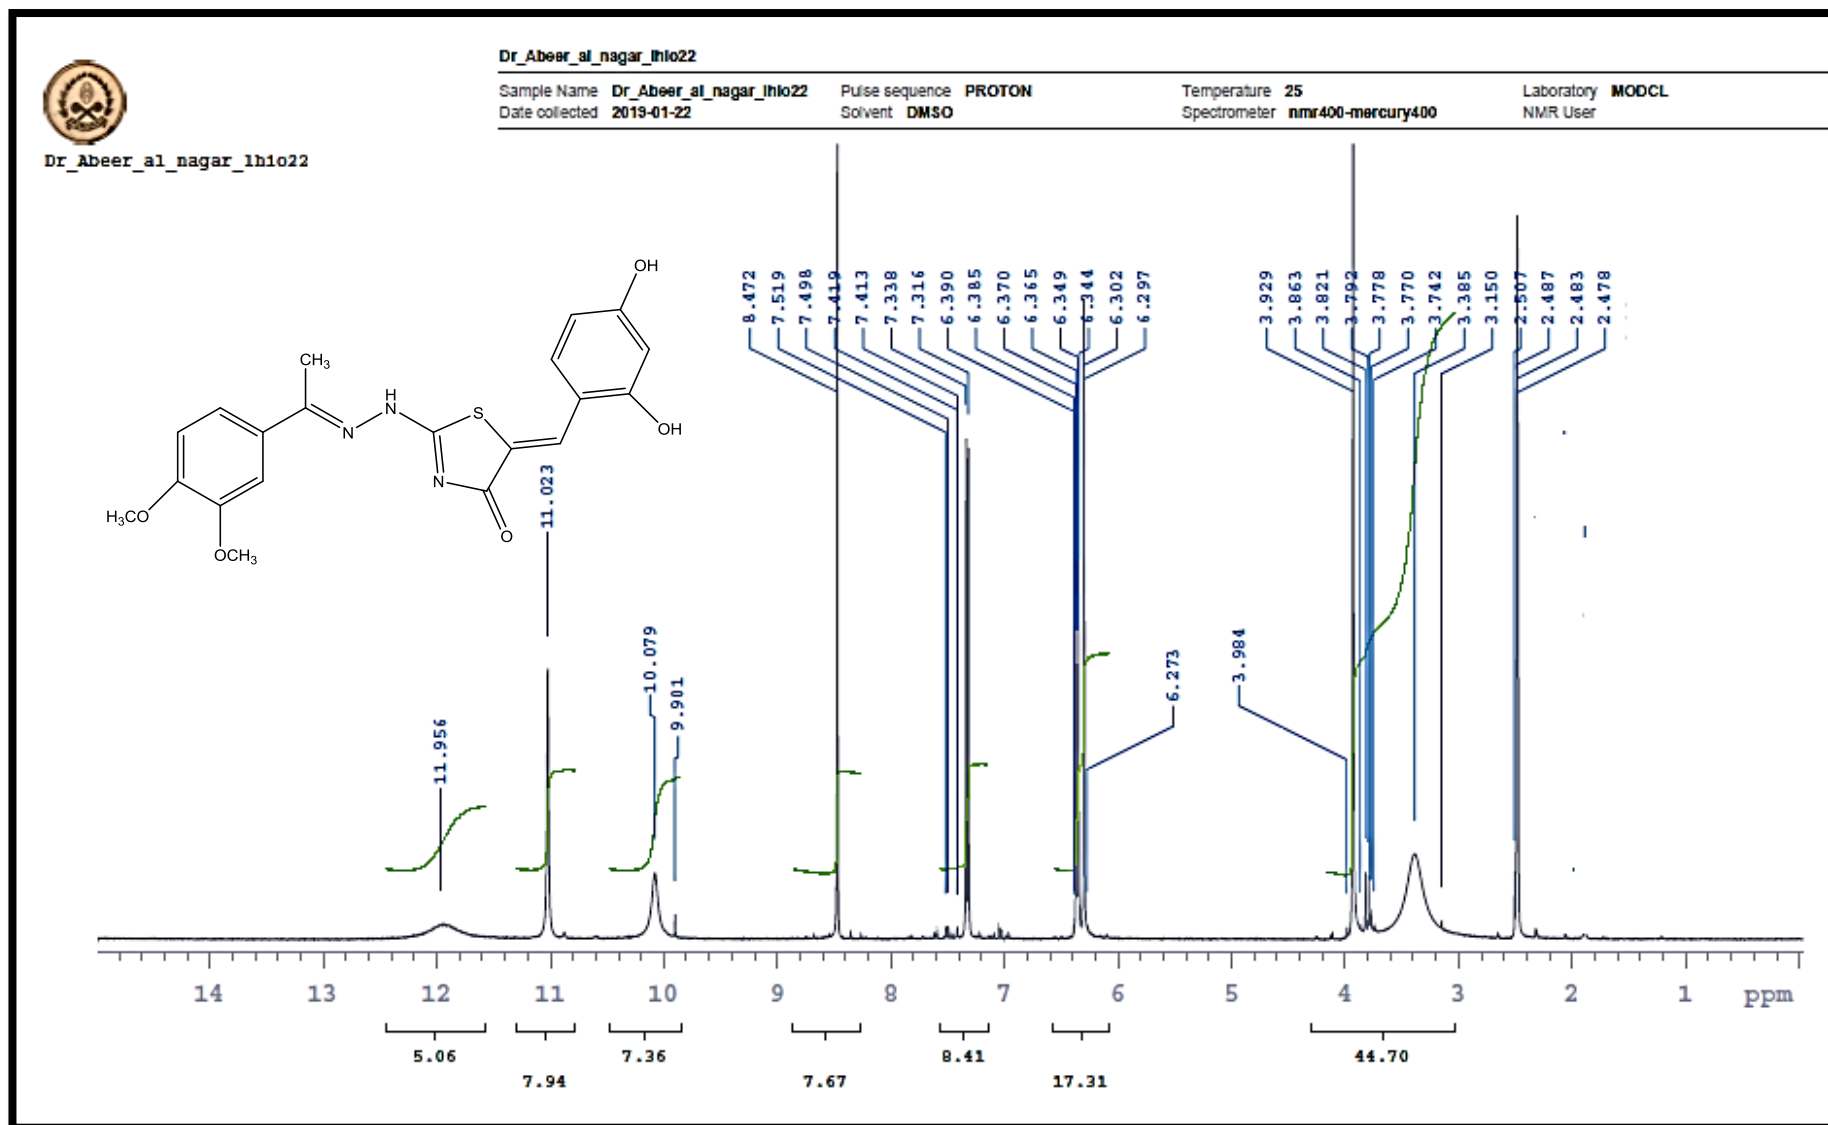

# D<sub>2</sub>O <sup>1</sup>H NMR of compound (4k)

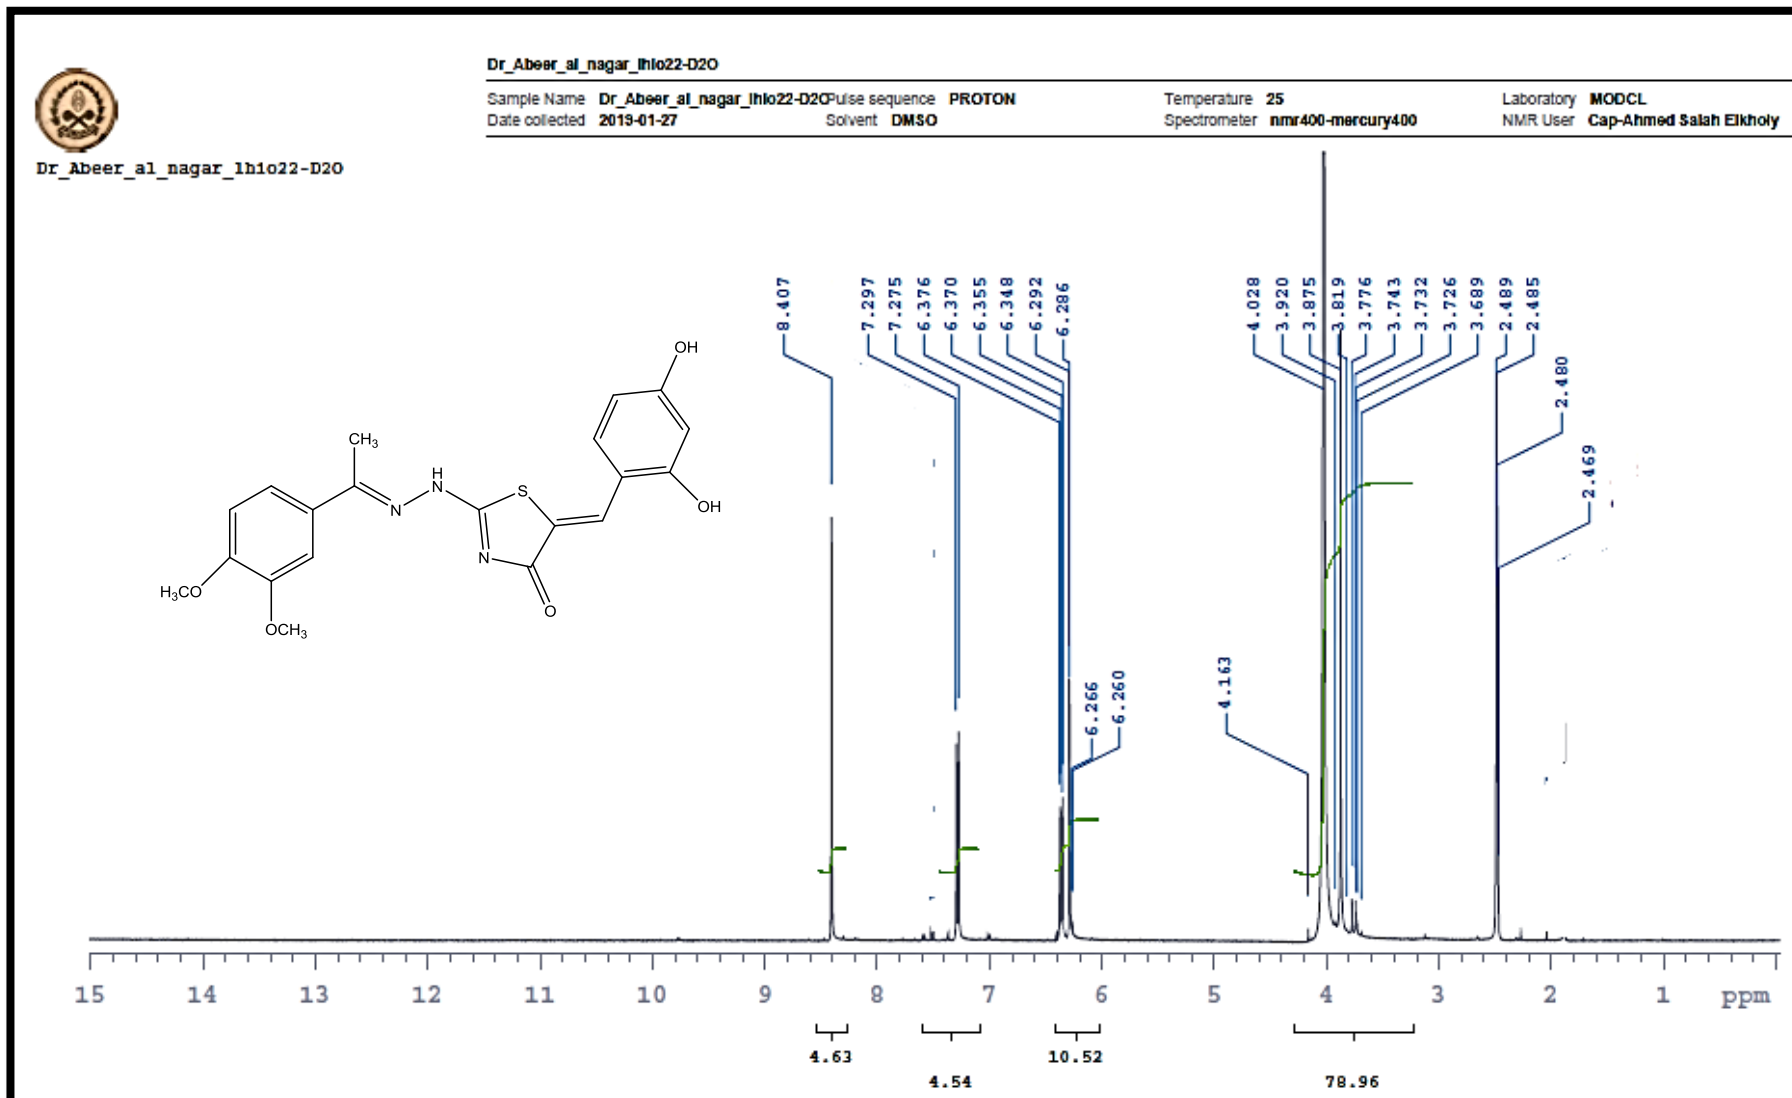

IR of compound (5a).

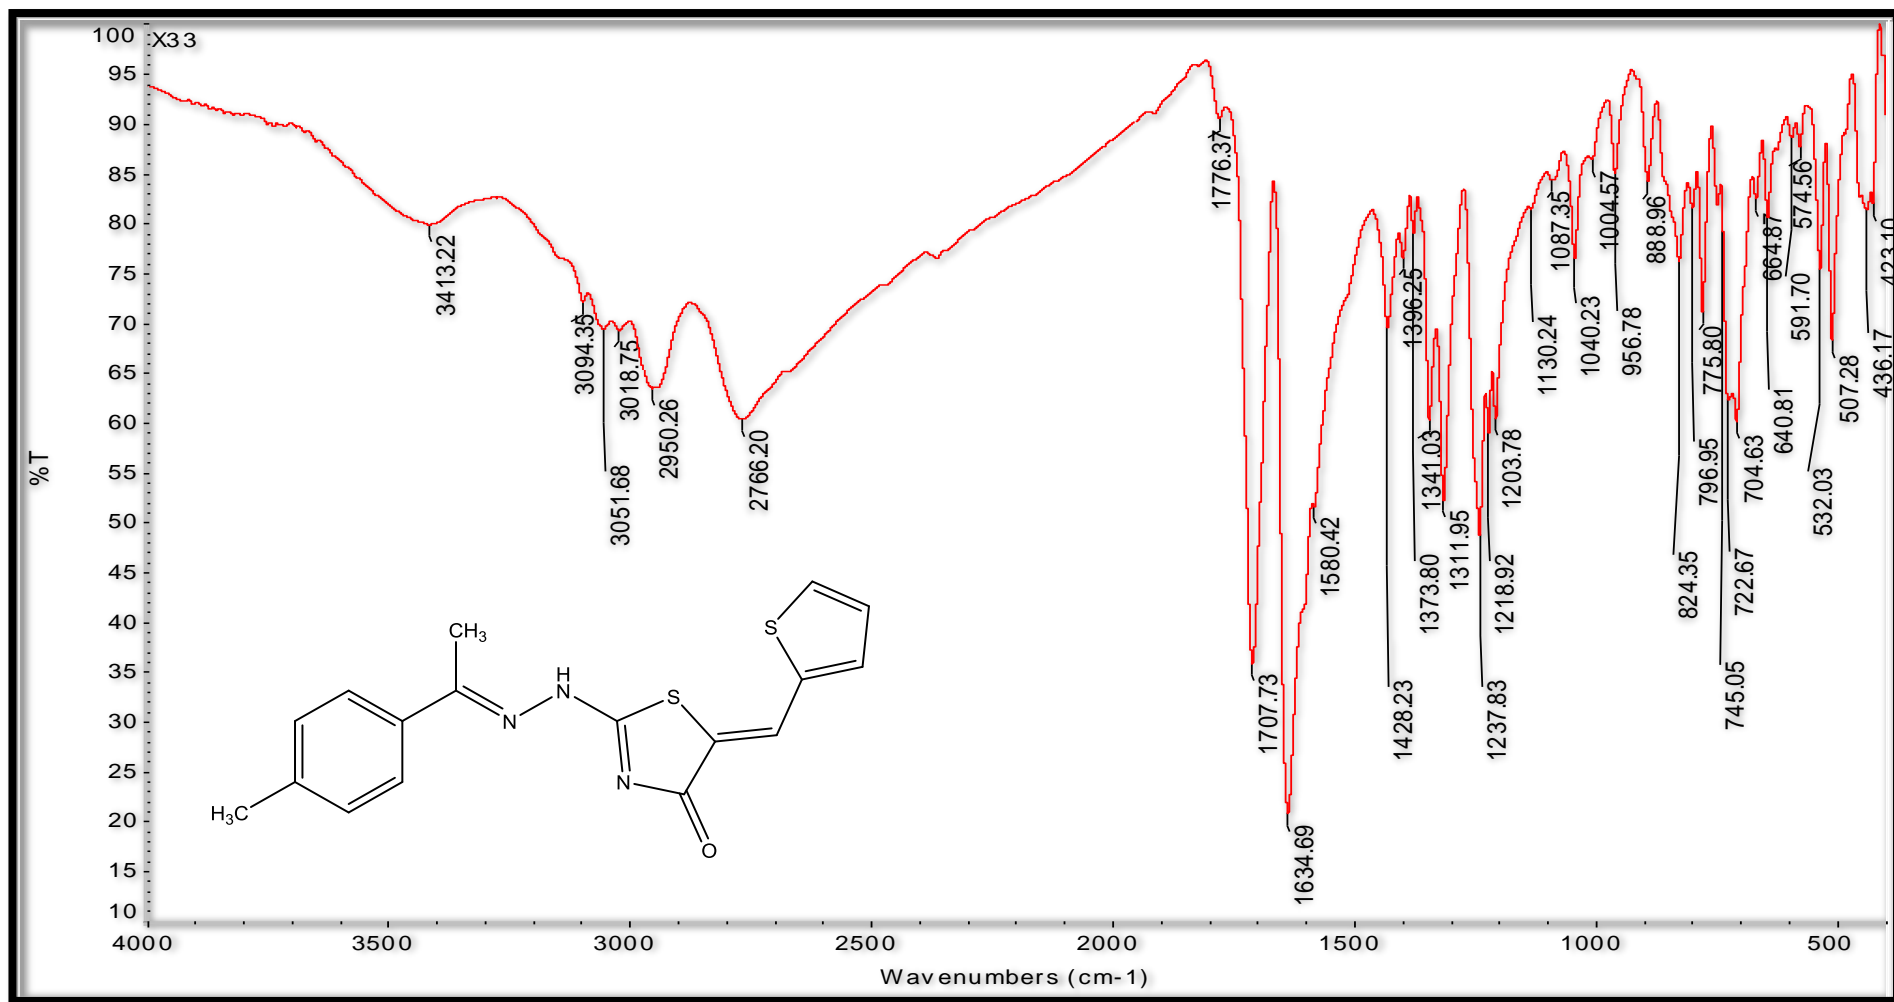

# <sup>1</sup>H NMR of compound (5a)

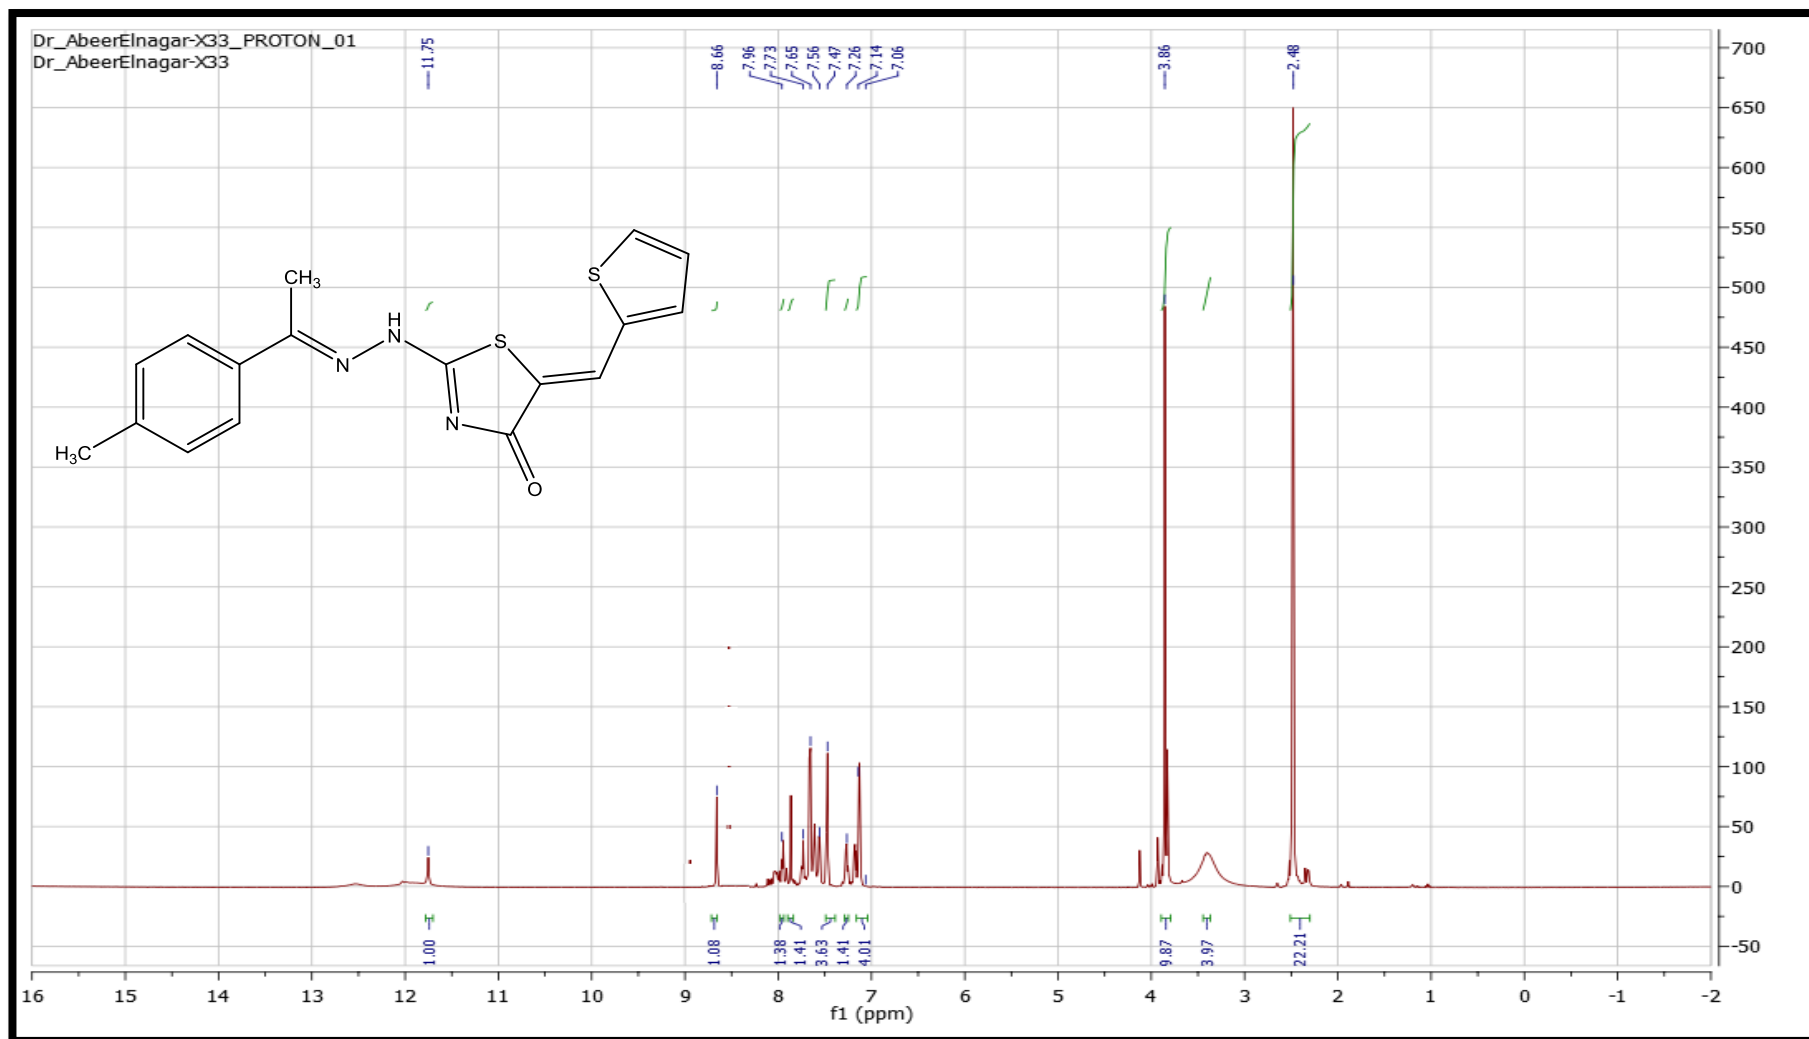

# IR of compound (5b)

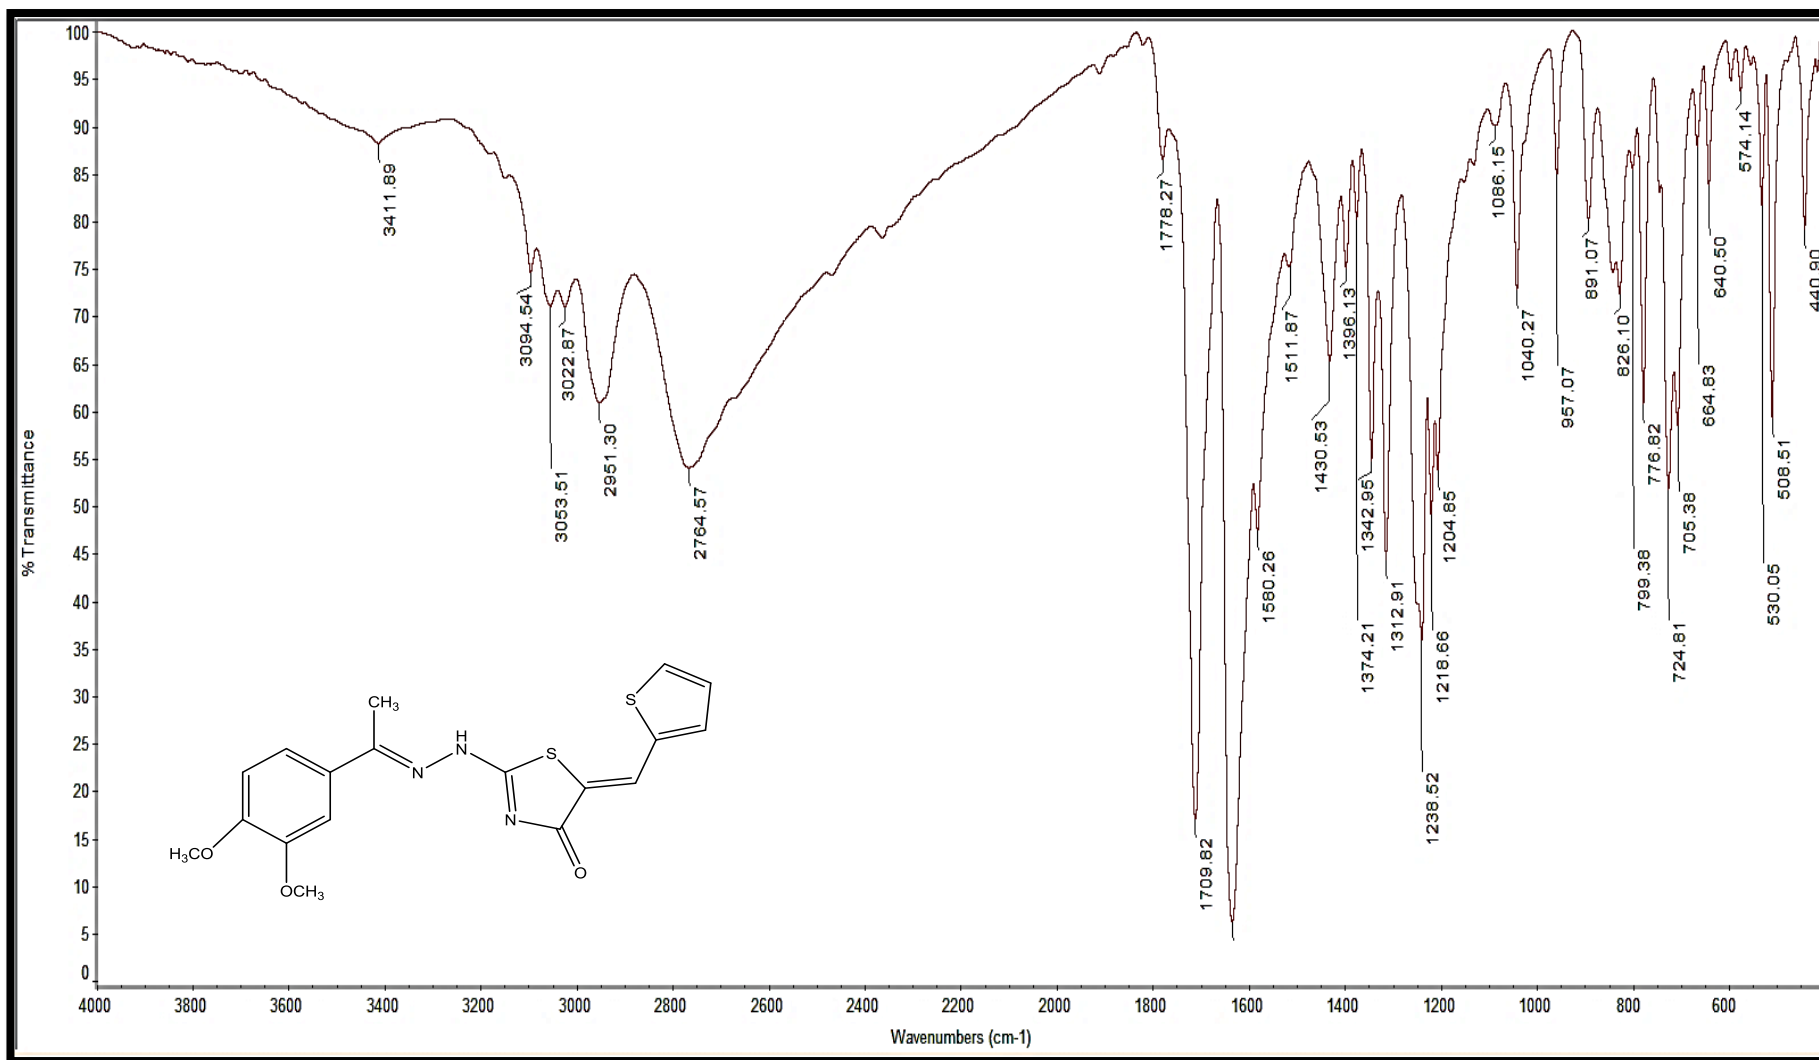



# <sup>1</sup>H NMR of compound (5b)

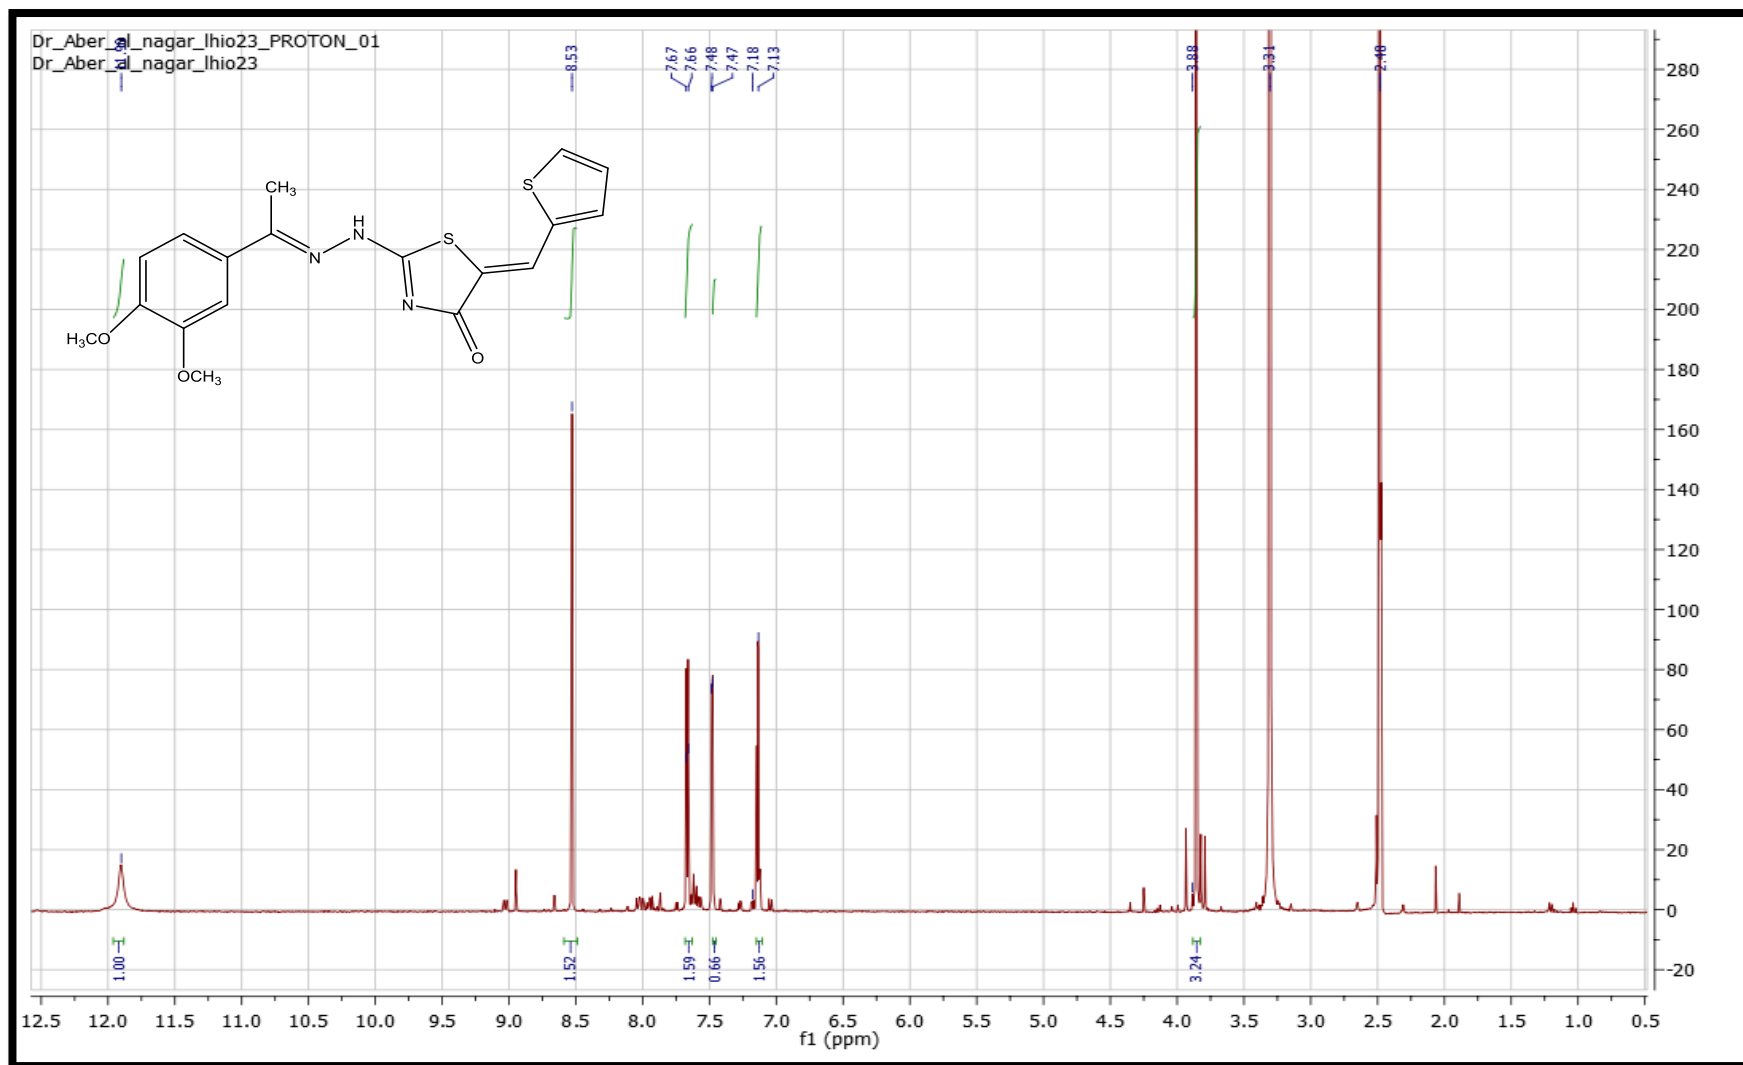

# <sup>1</sup>H NMR of compound (5b)

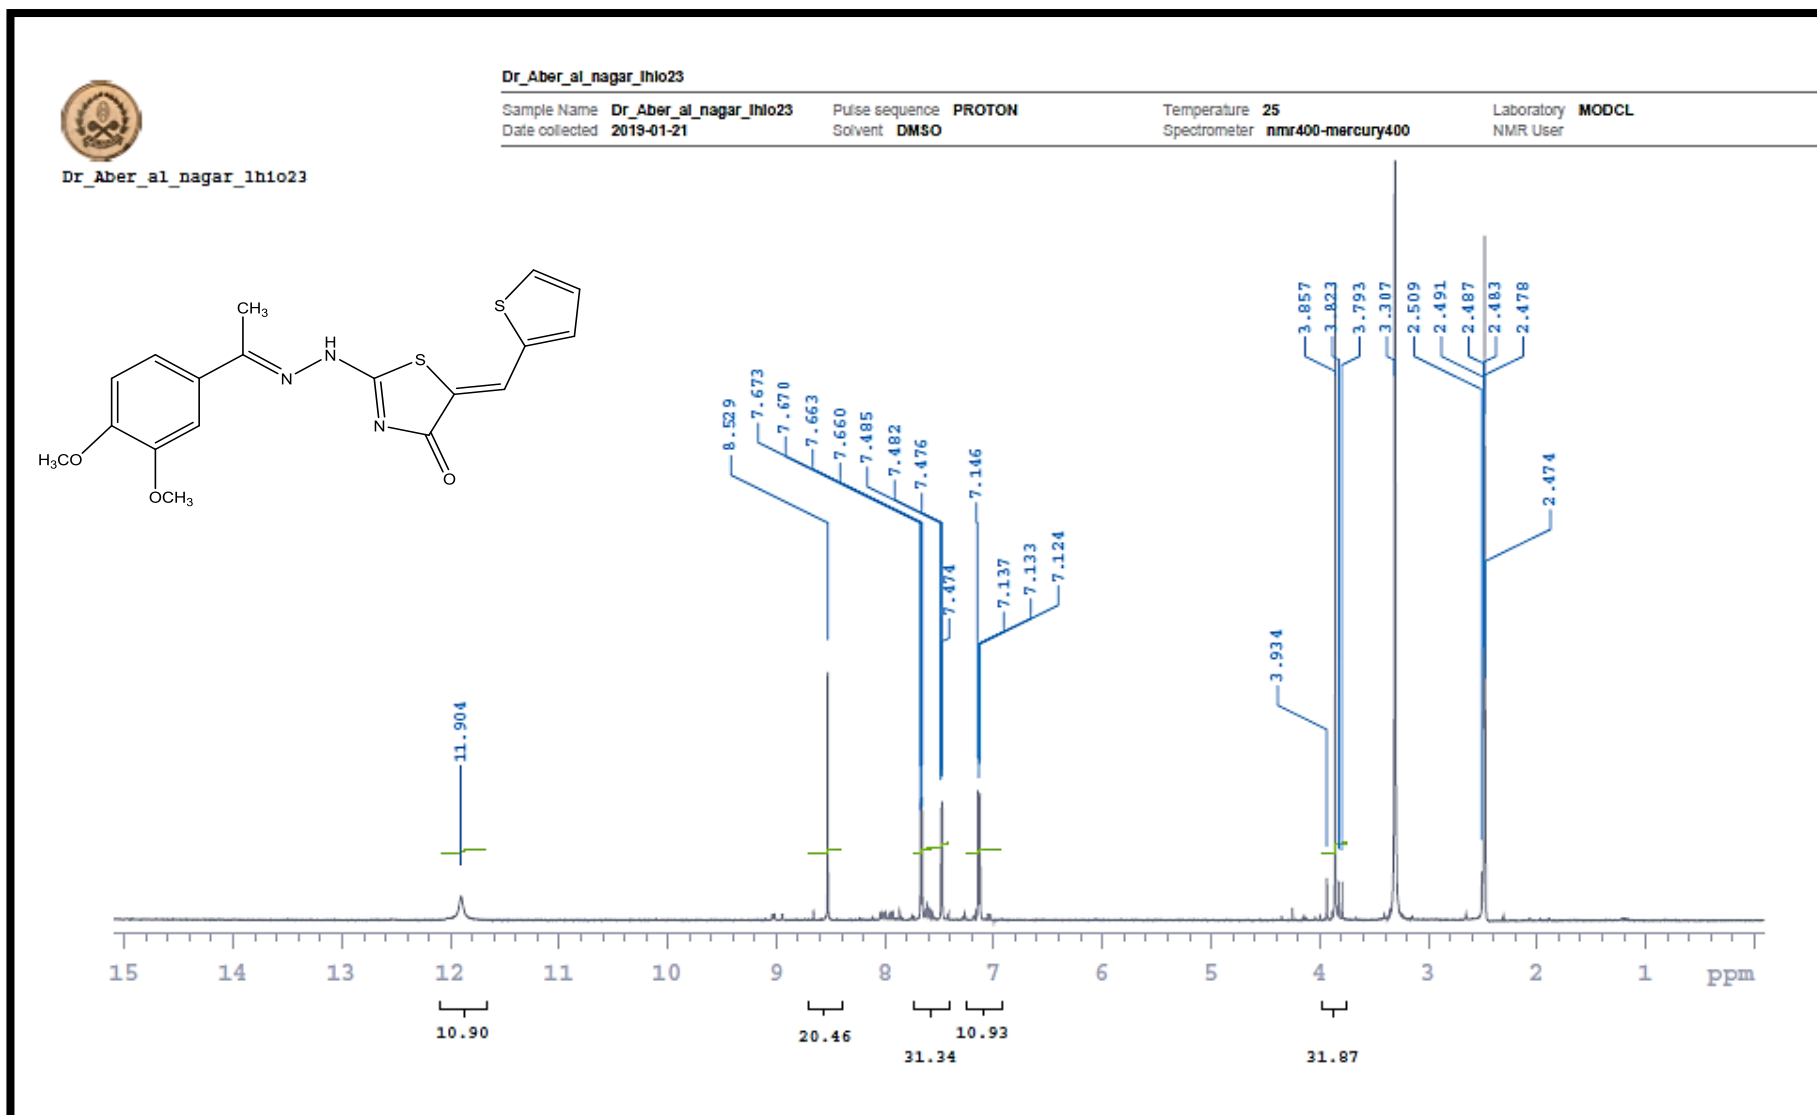

# <sup>1</sup>H NMR of compound (5b)

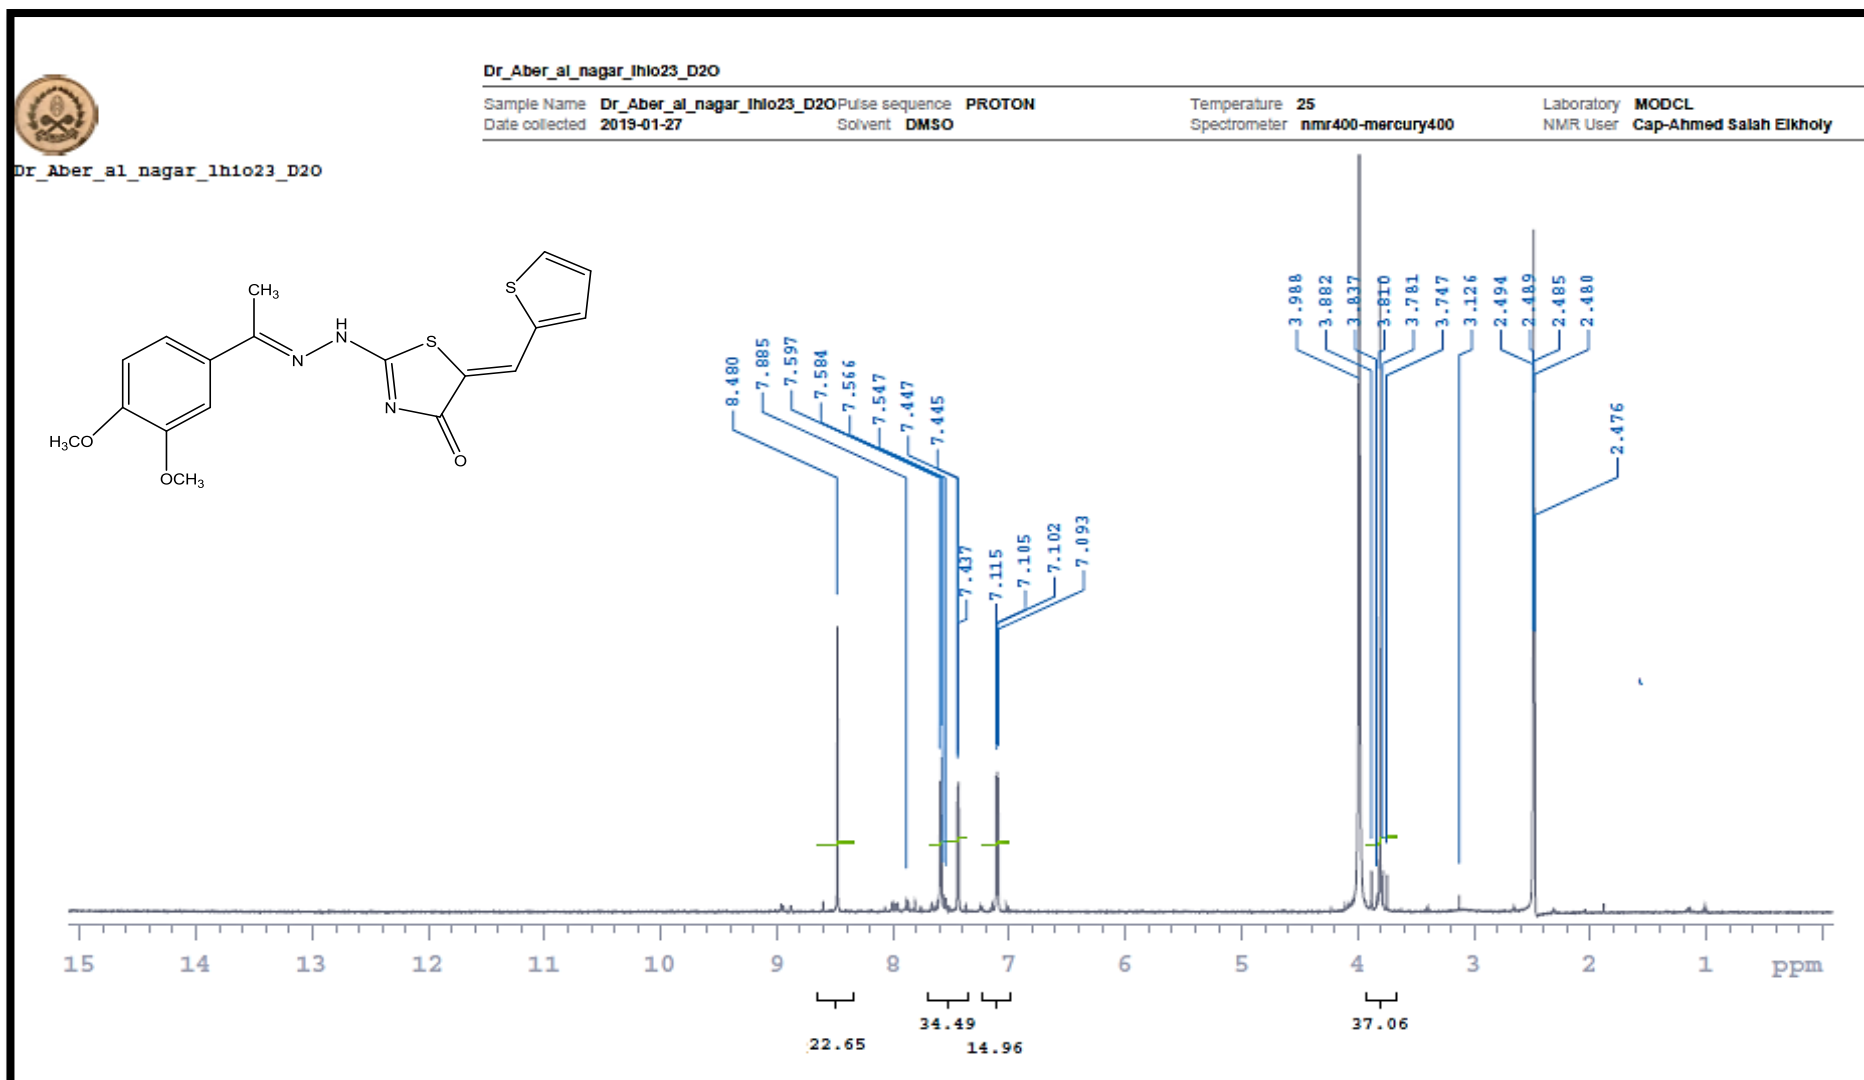

# IR of compound (8a)

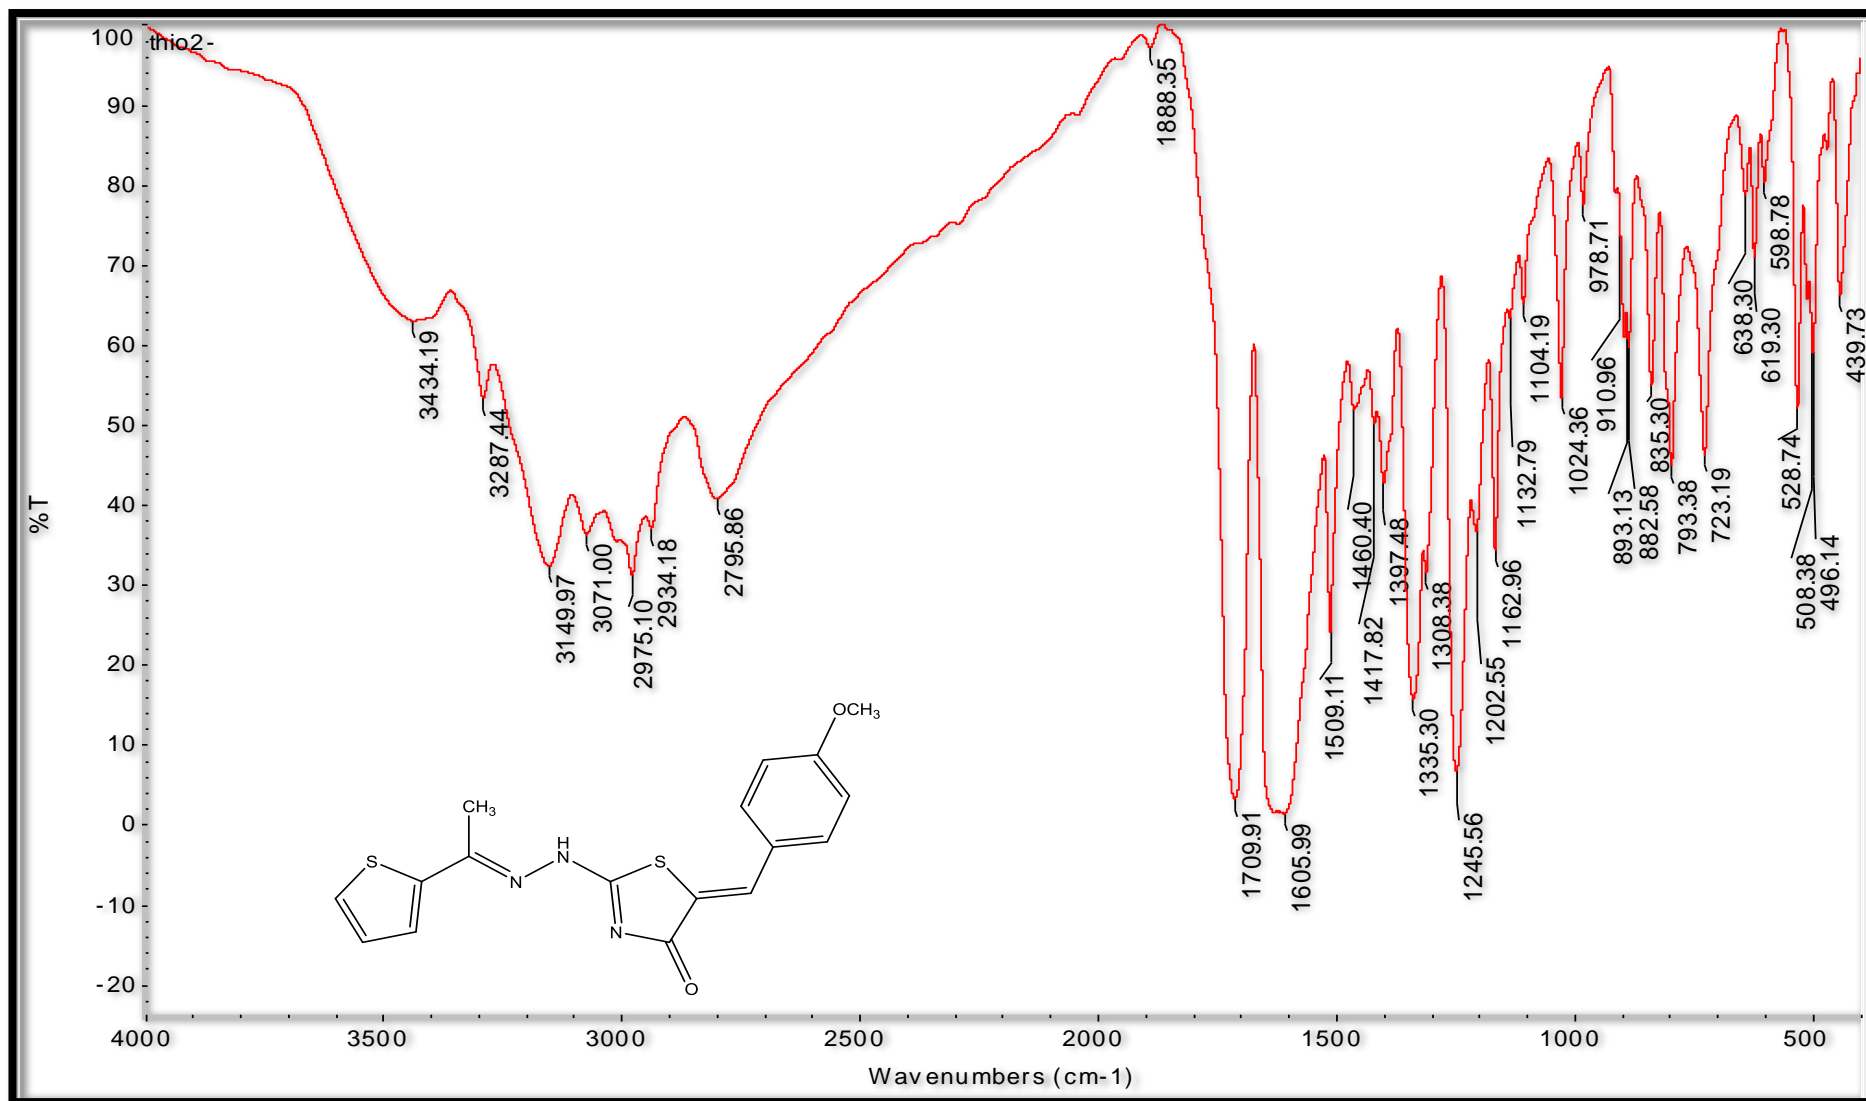

# <sup>1</sup>H NMR of compound (8a)

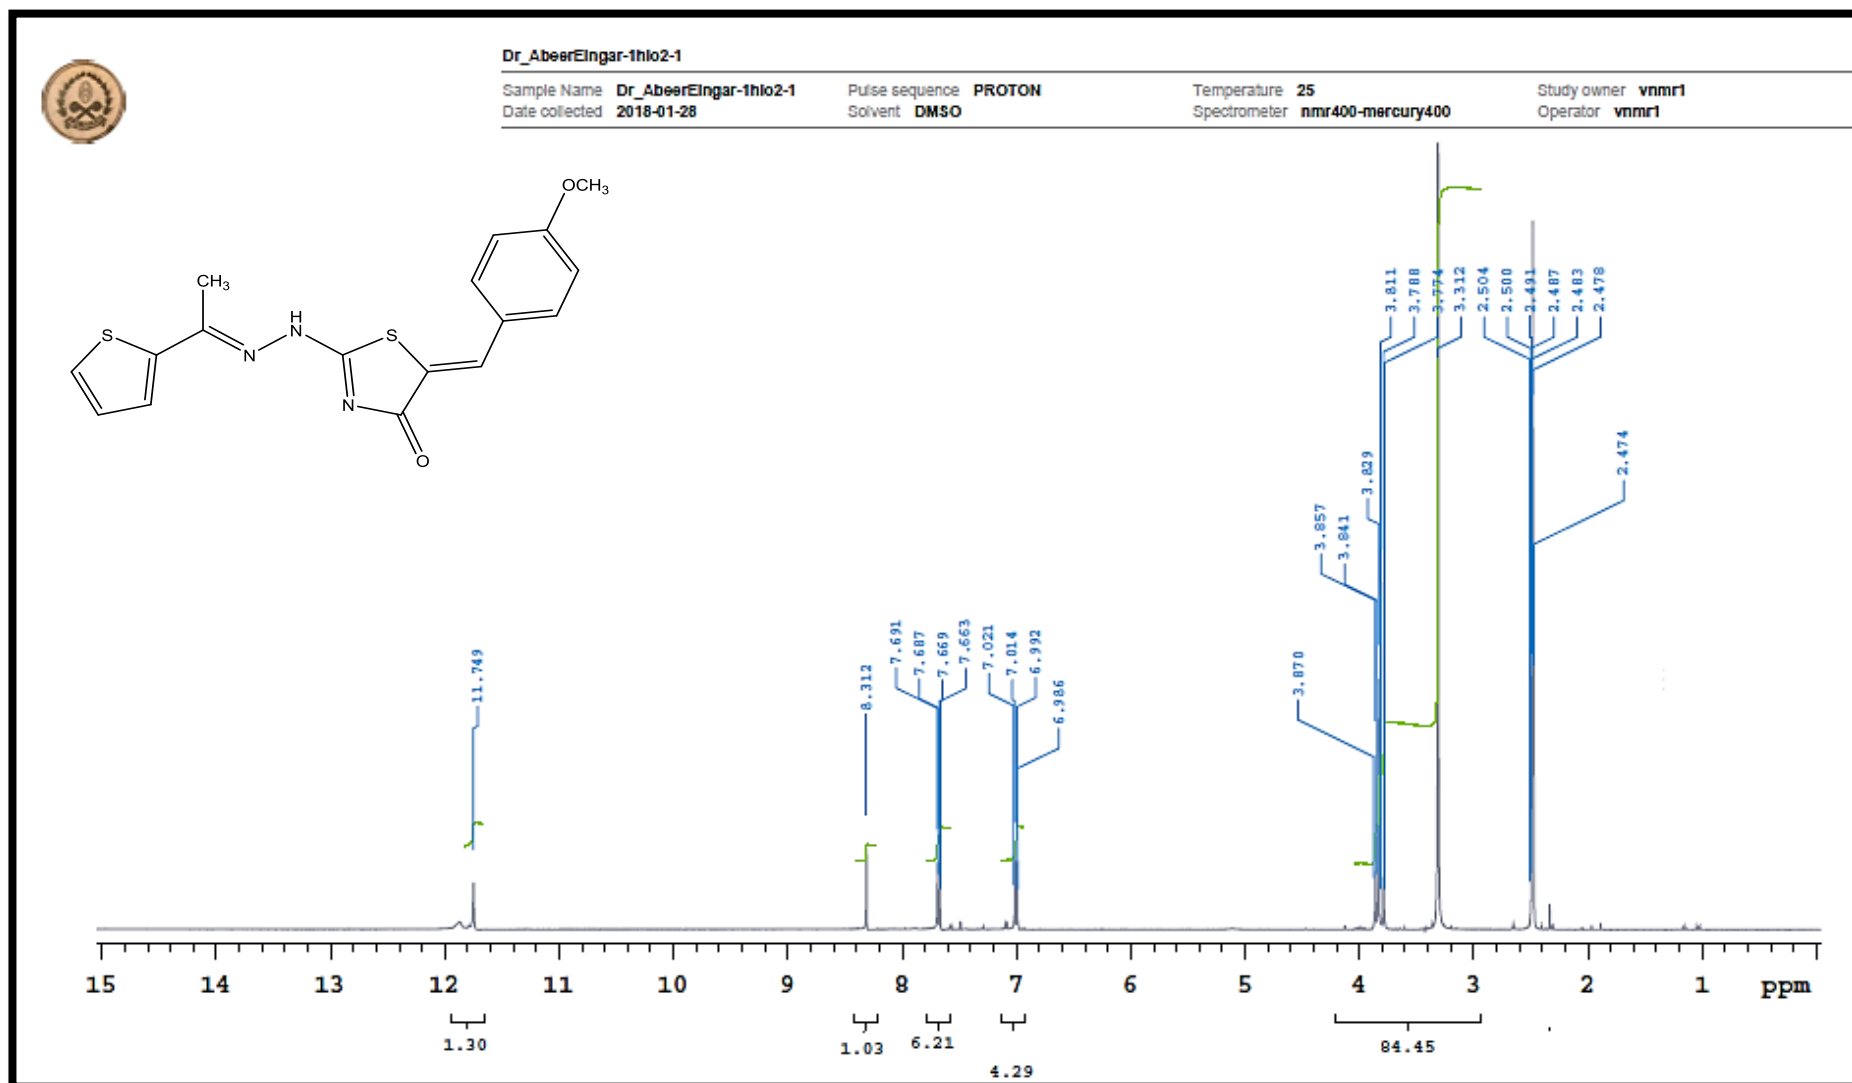

# IR of compound (8b)

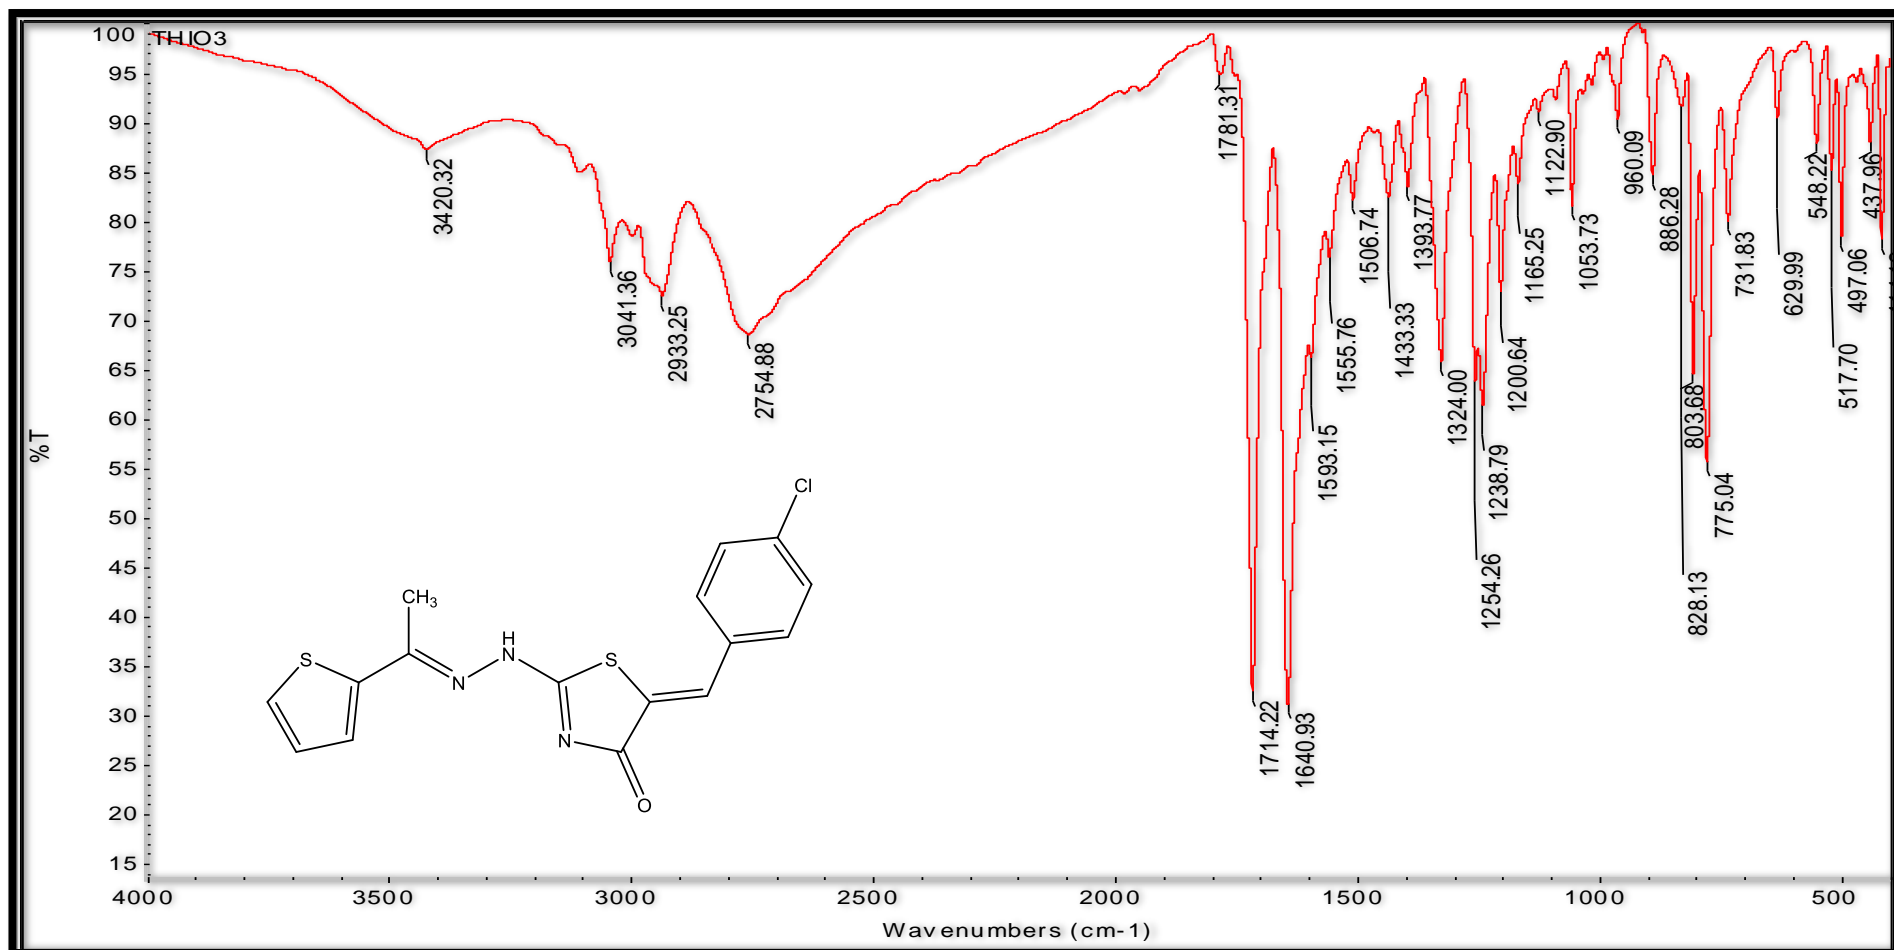

# <sup>1</sup>H NMR of compound (8b)

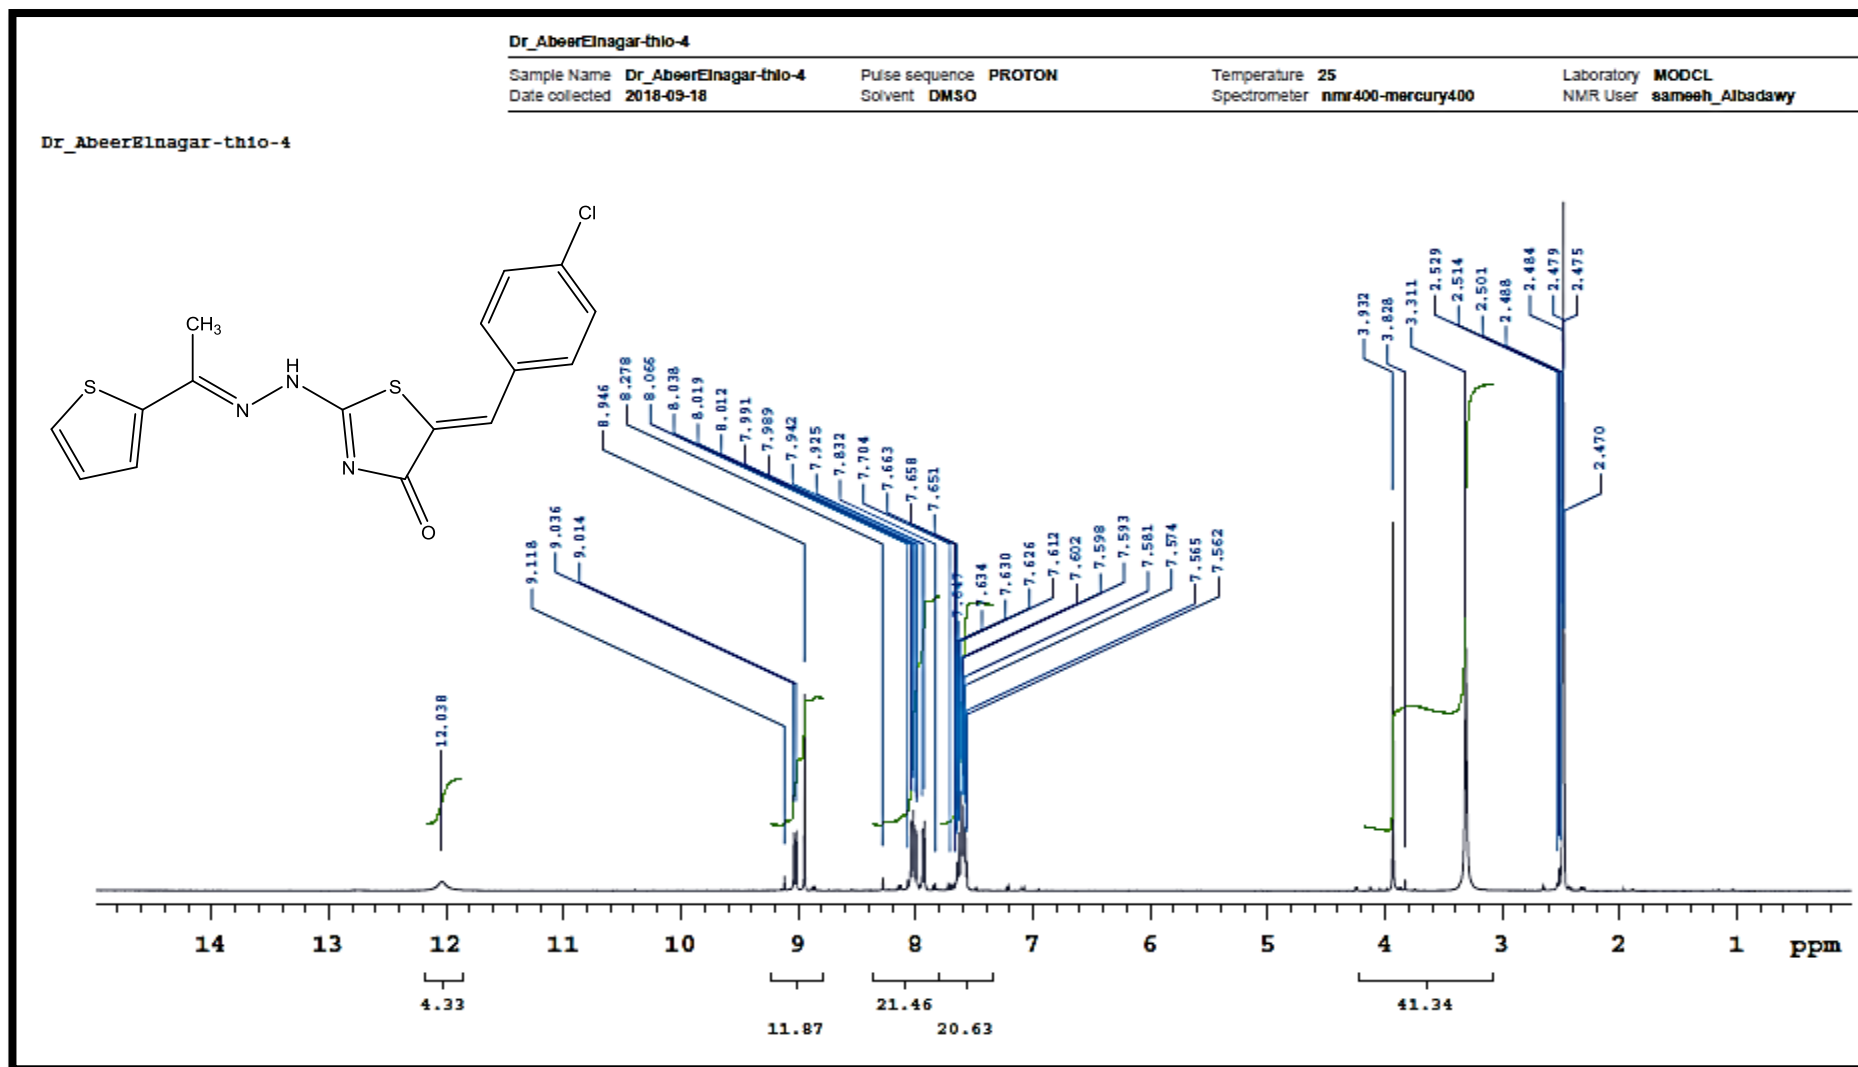

# <sup>1</sup>H NMR of compound (8b)

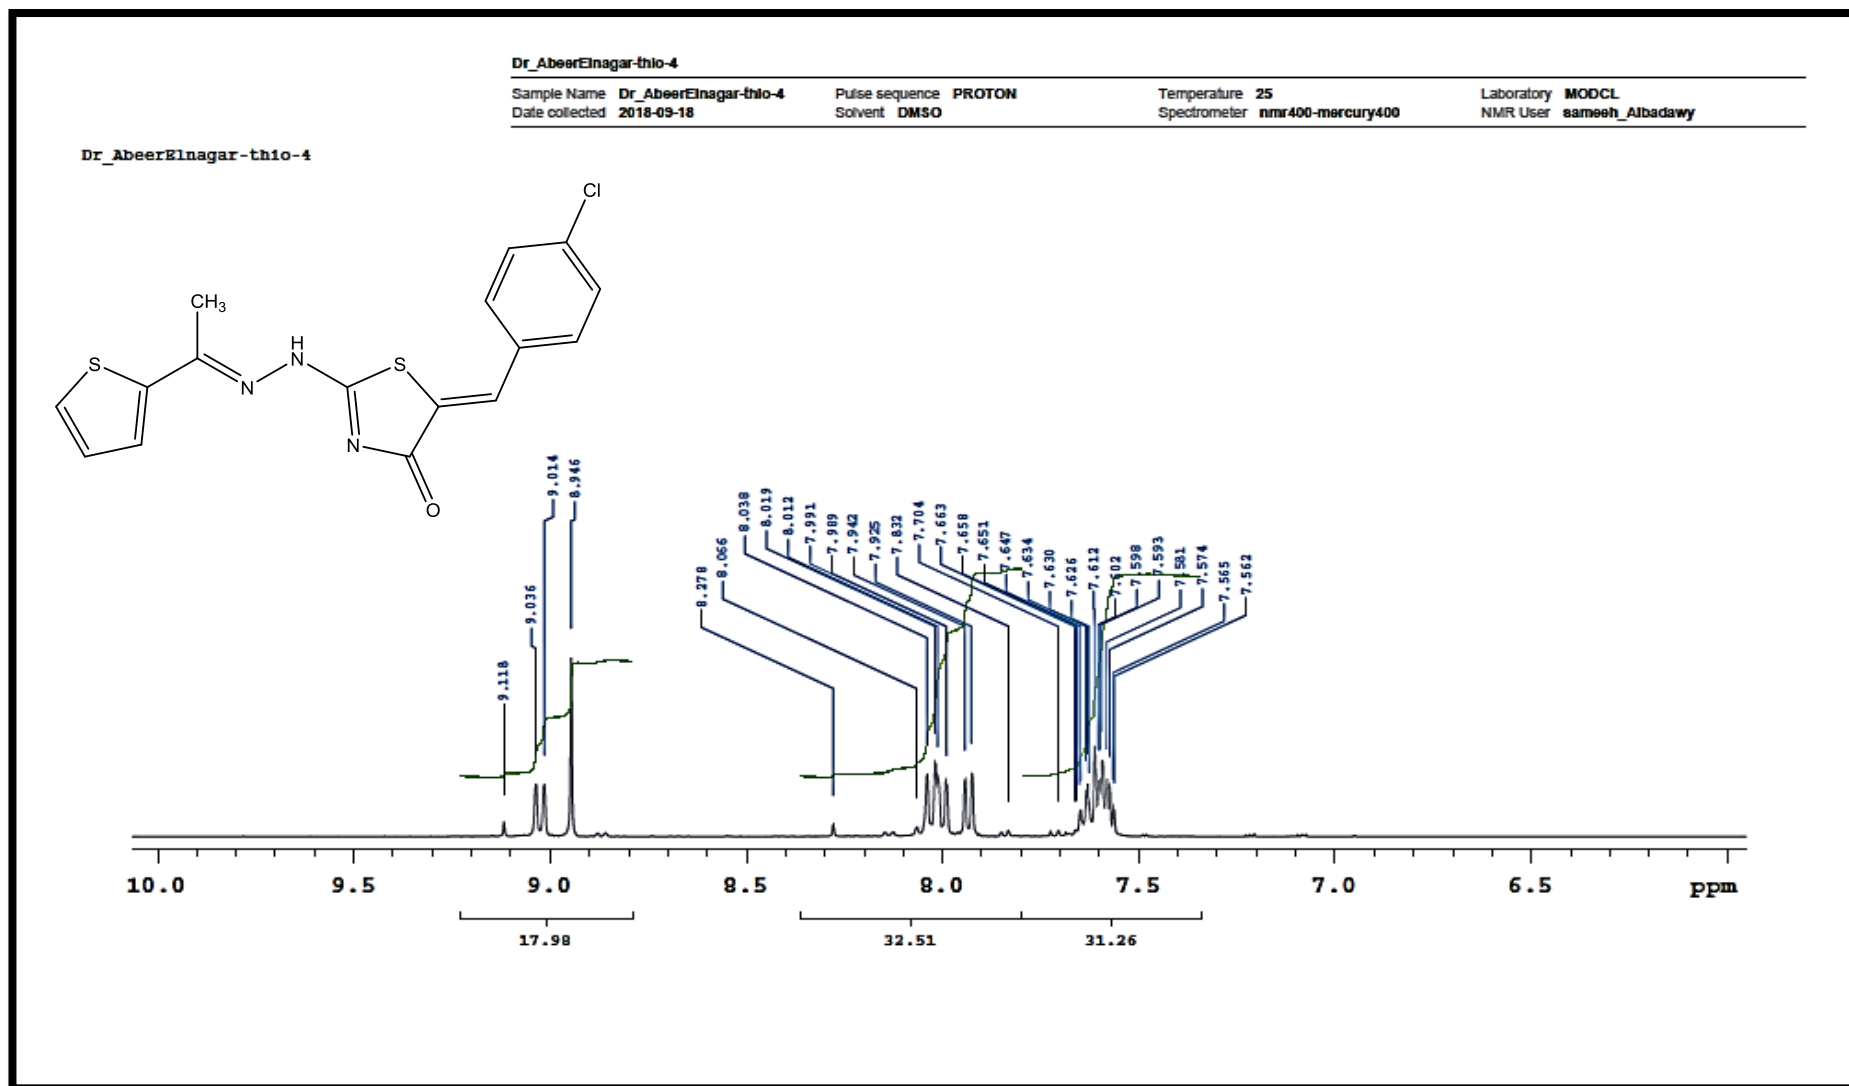



# <sup>1</sup>H NMR of compound (8b)

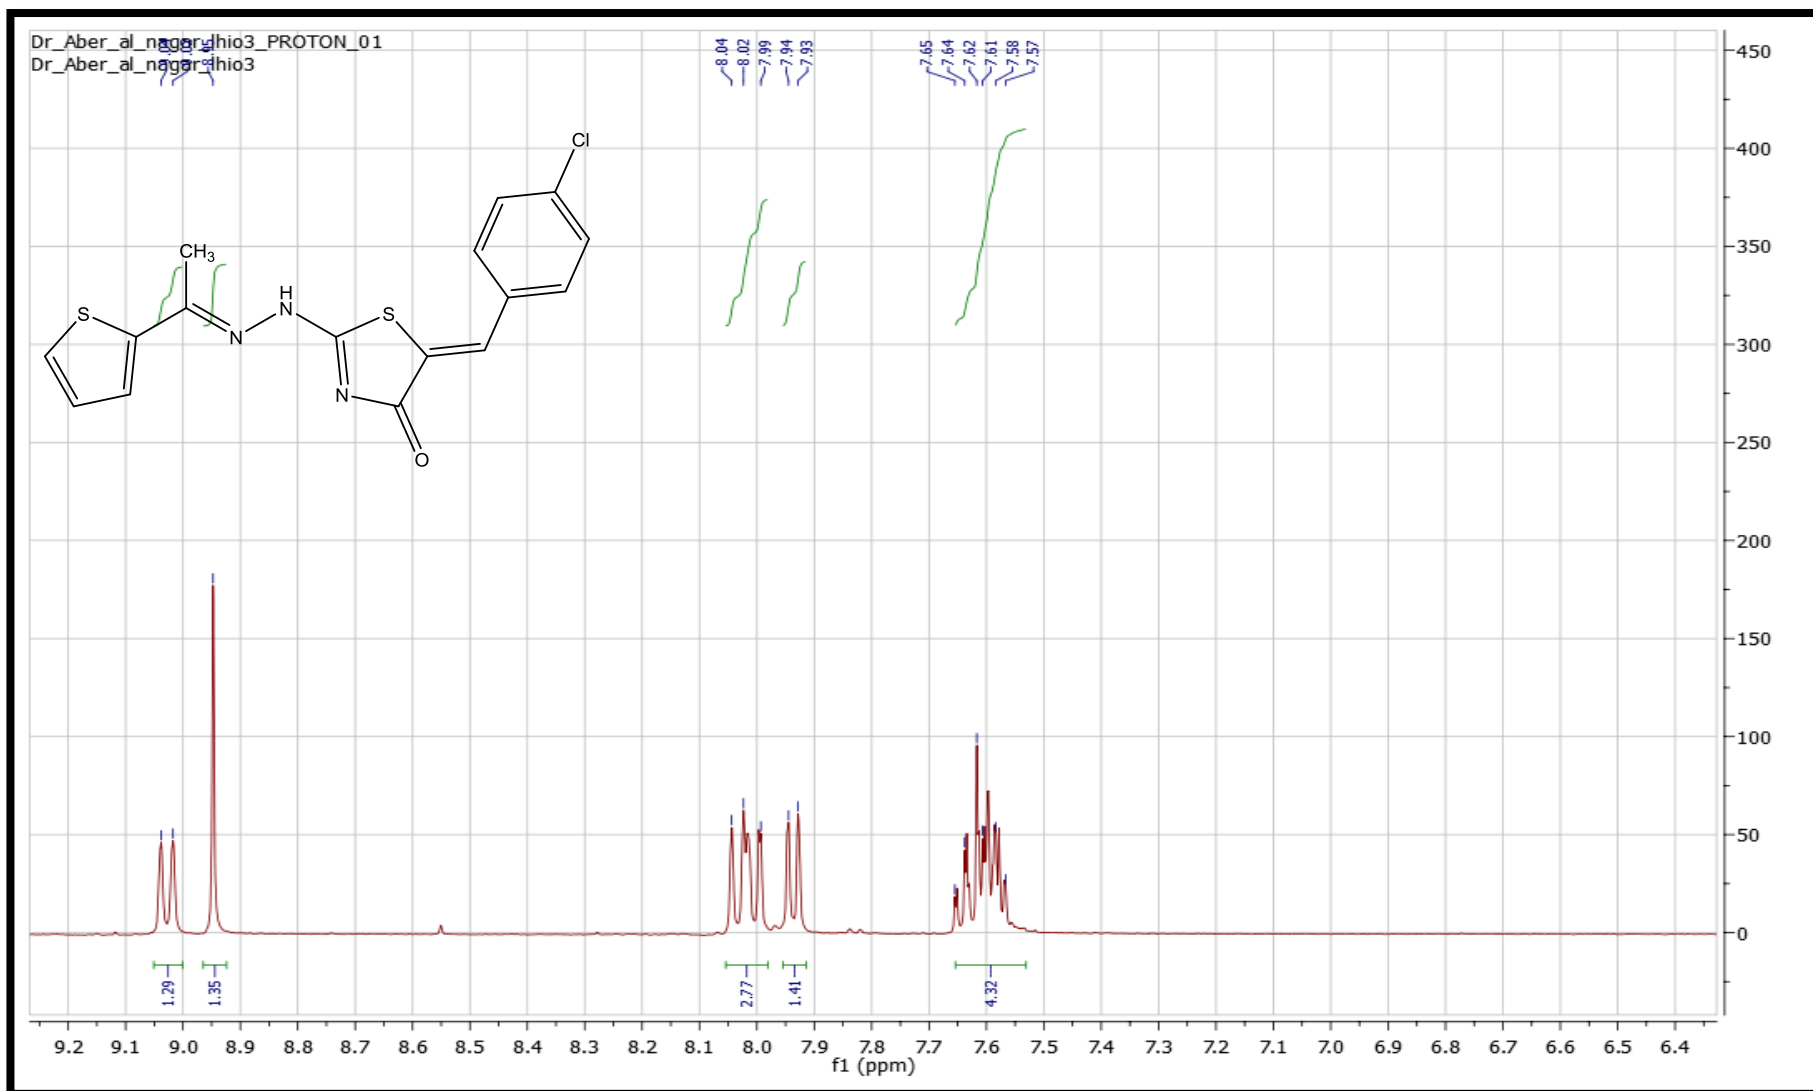

# IR of compound (8c)

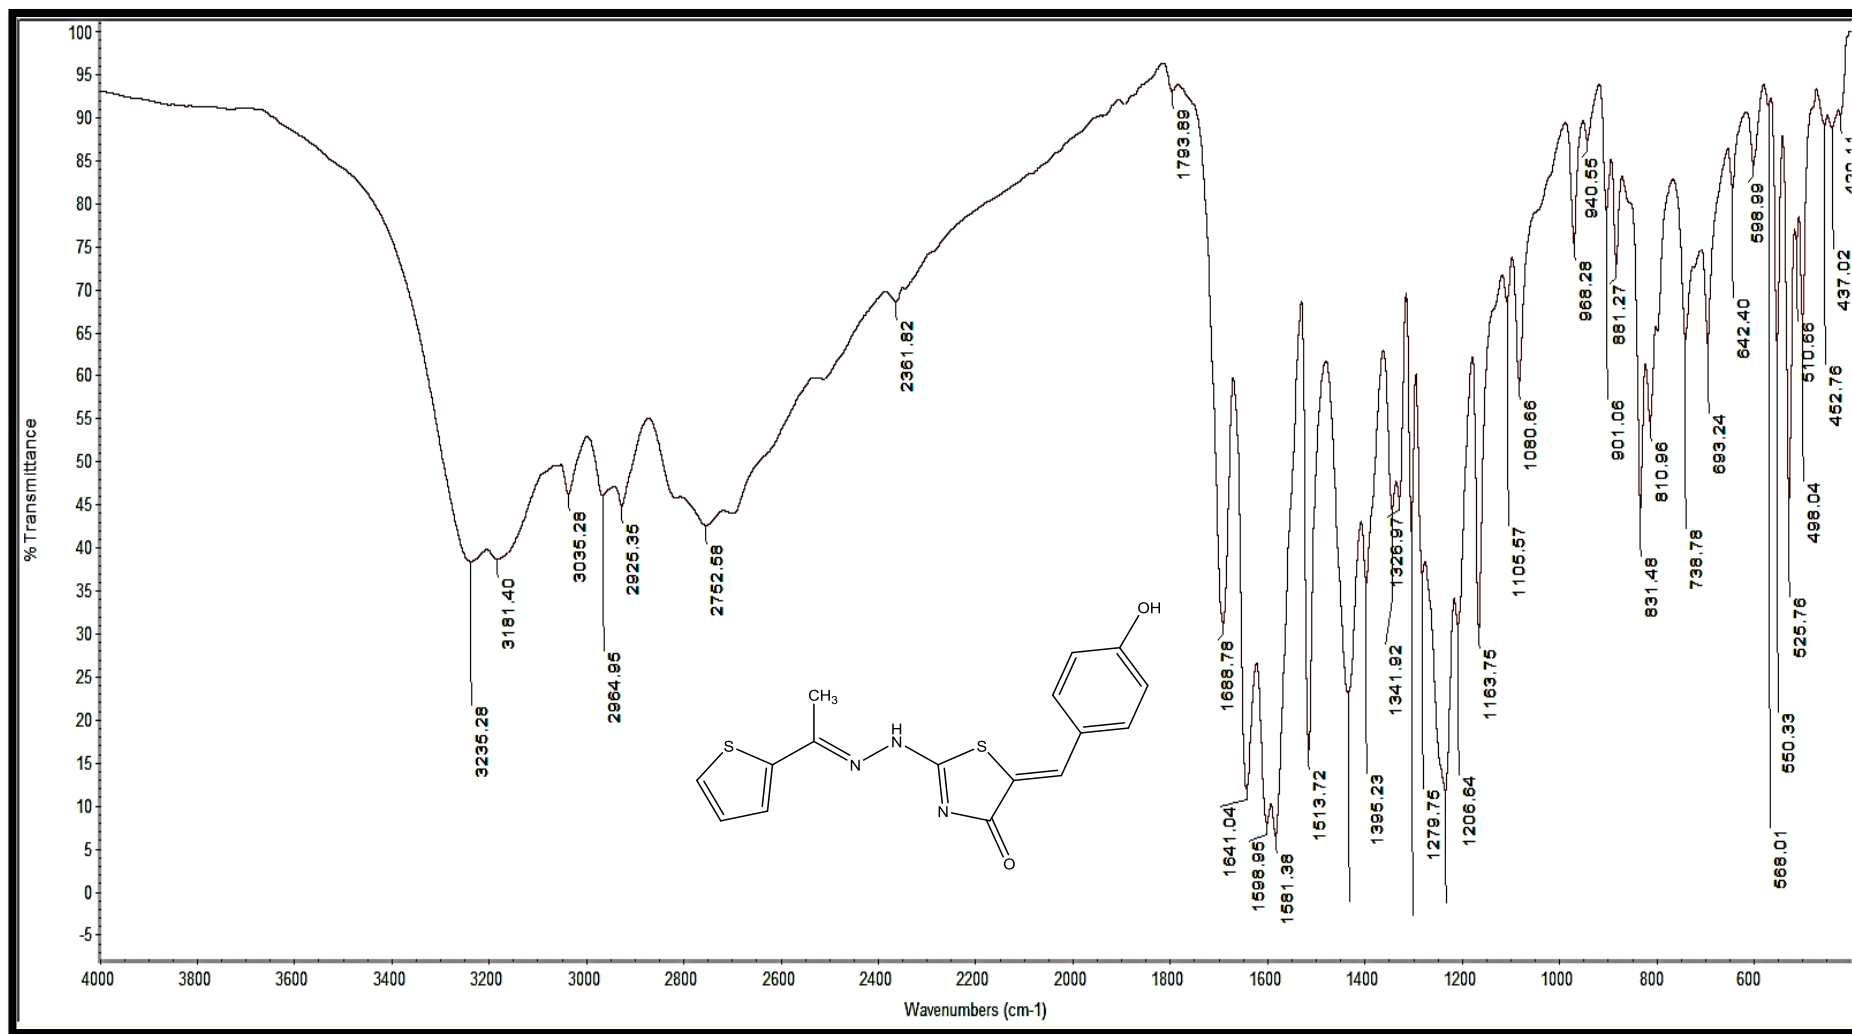

# <sup>1</sup>H NMR of compound (8c)

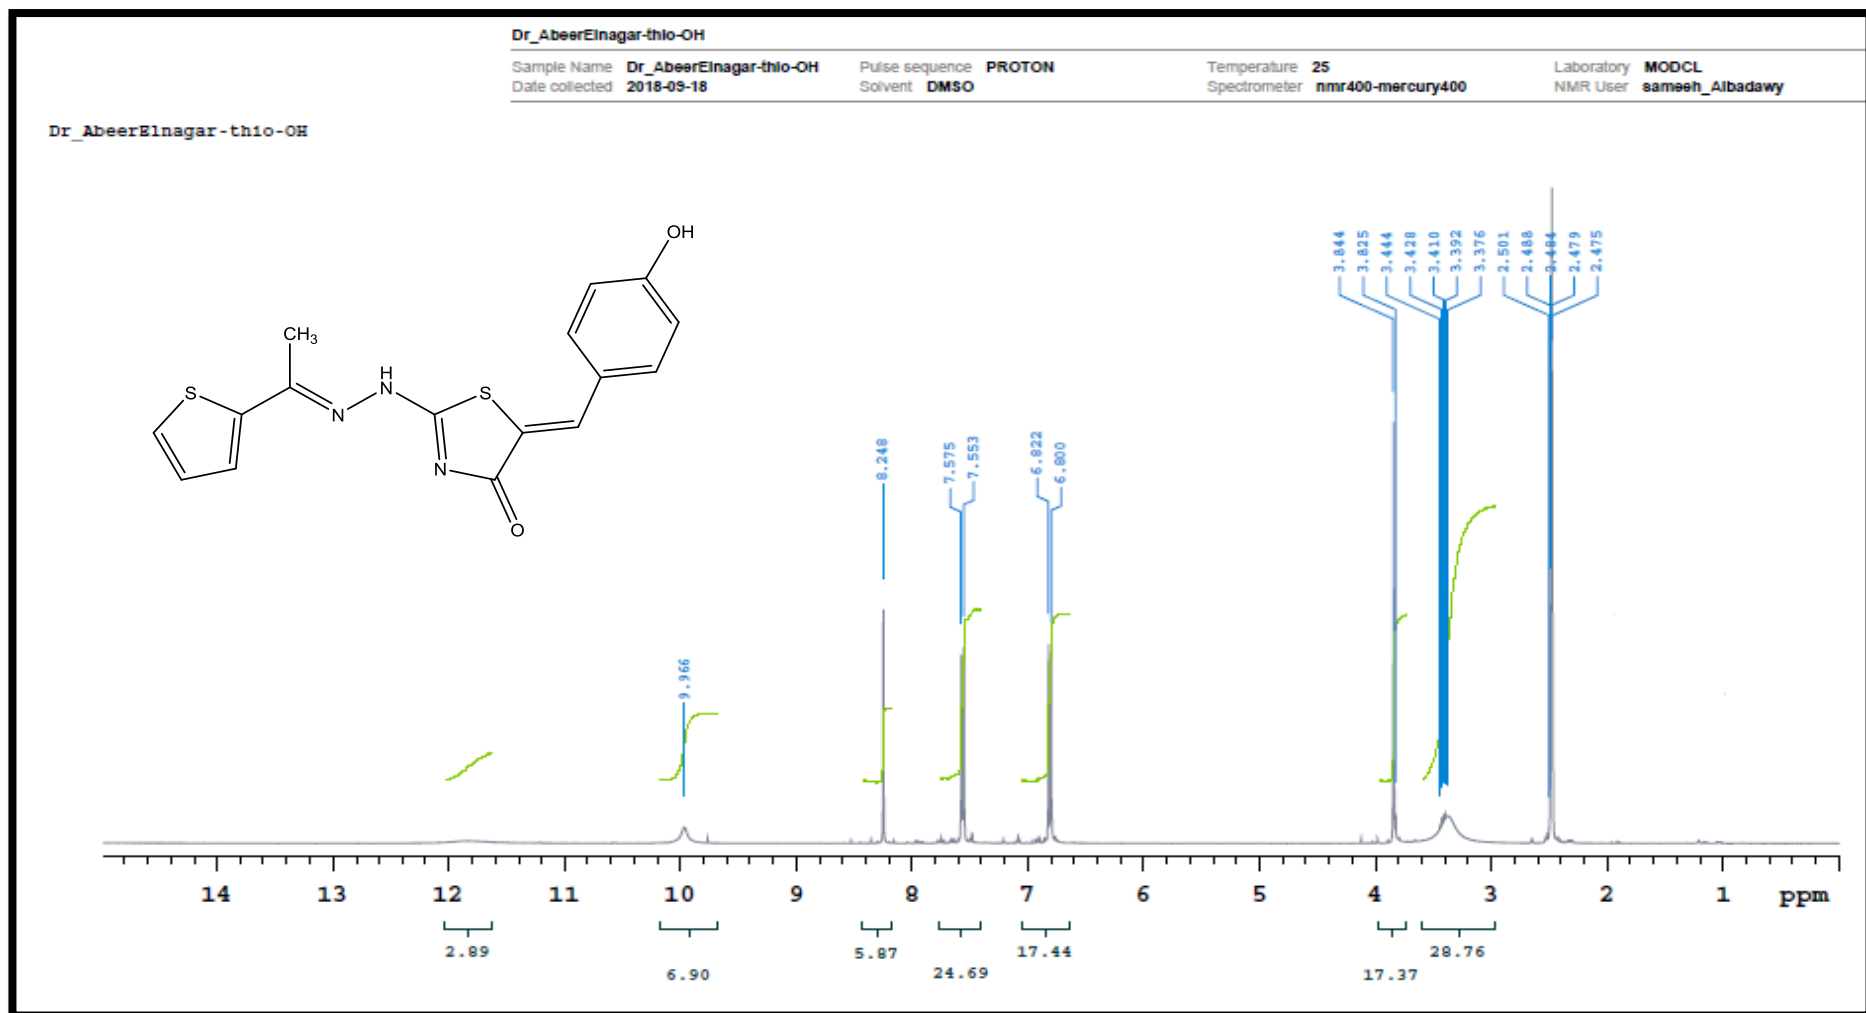

# D<sub>2</sub>O <sup>1</sup>H NMR of compound (8c)

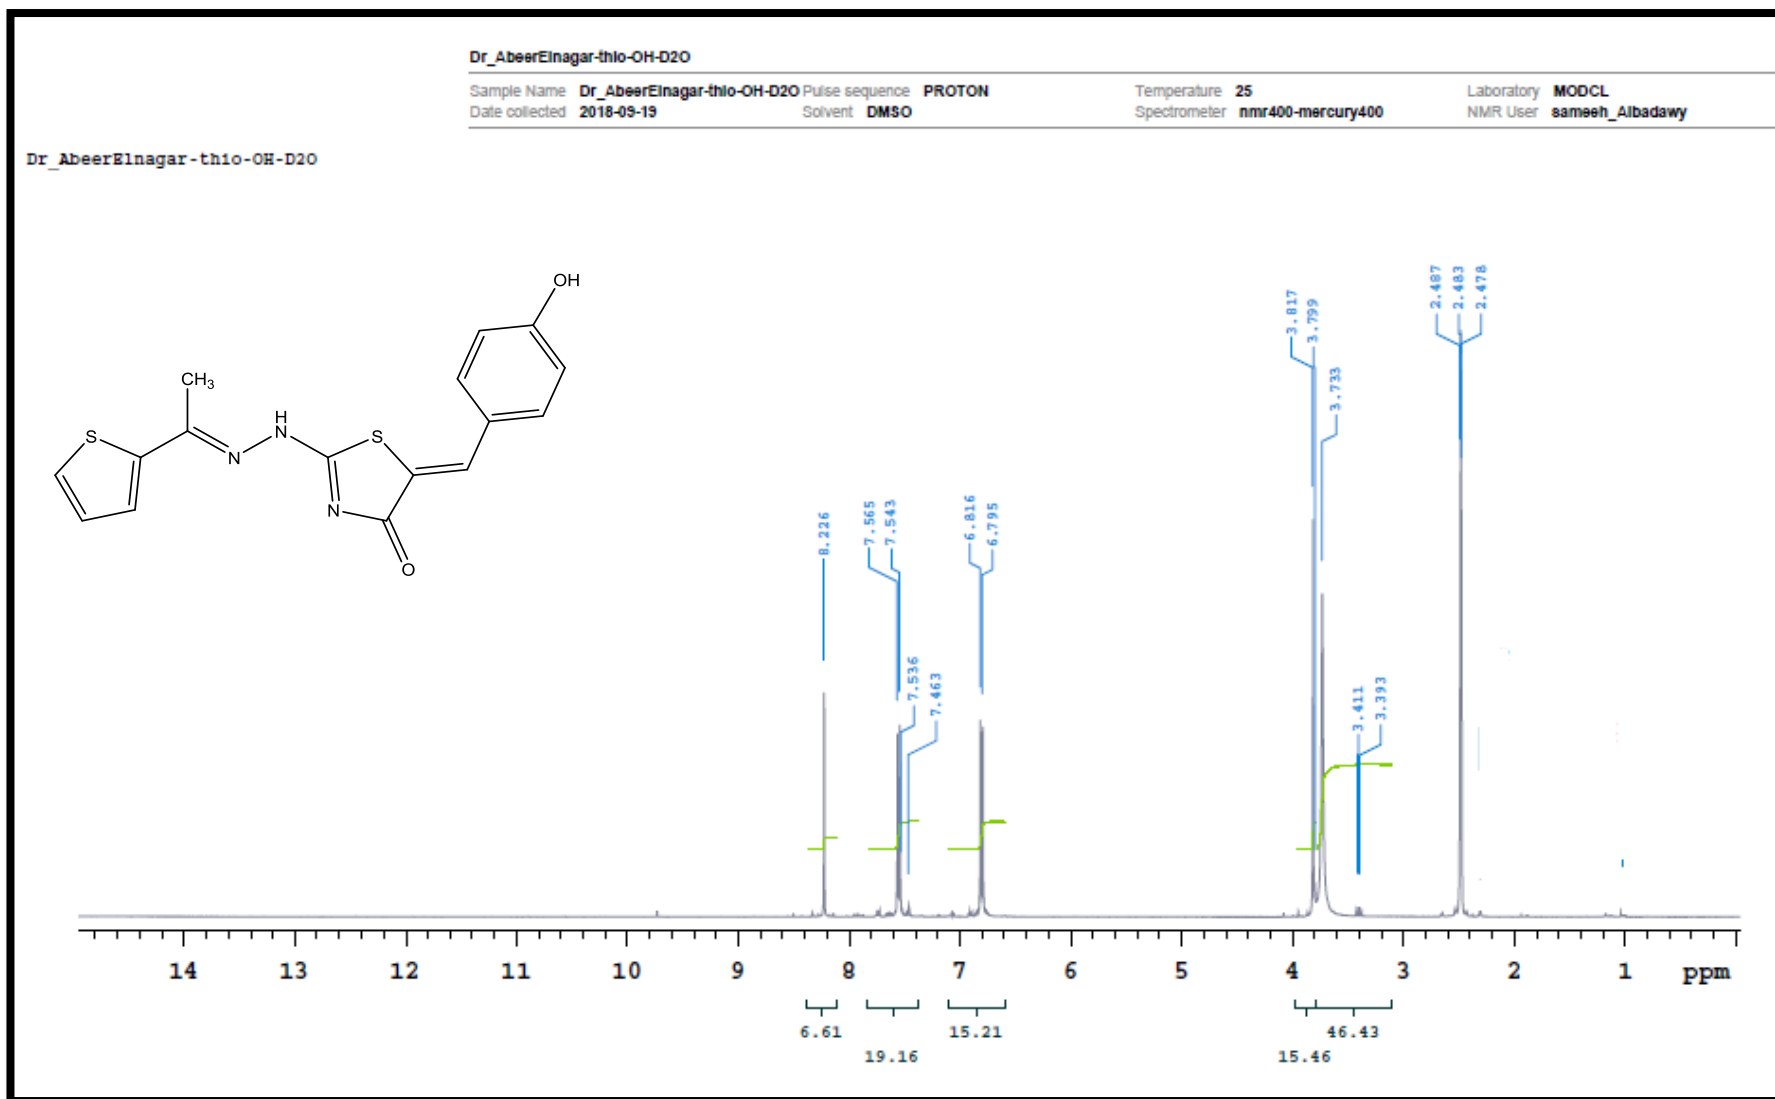

# <sup>1</sup>H NMR of compound (8c)

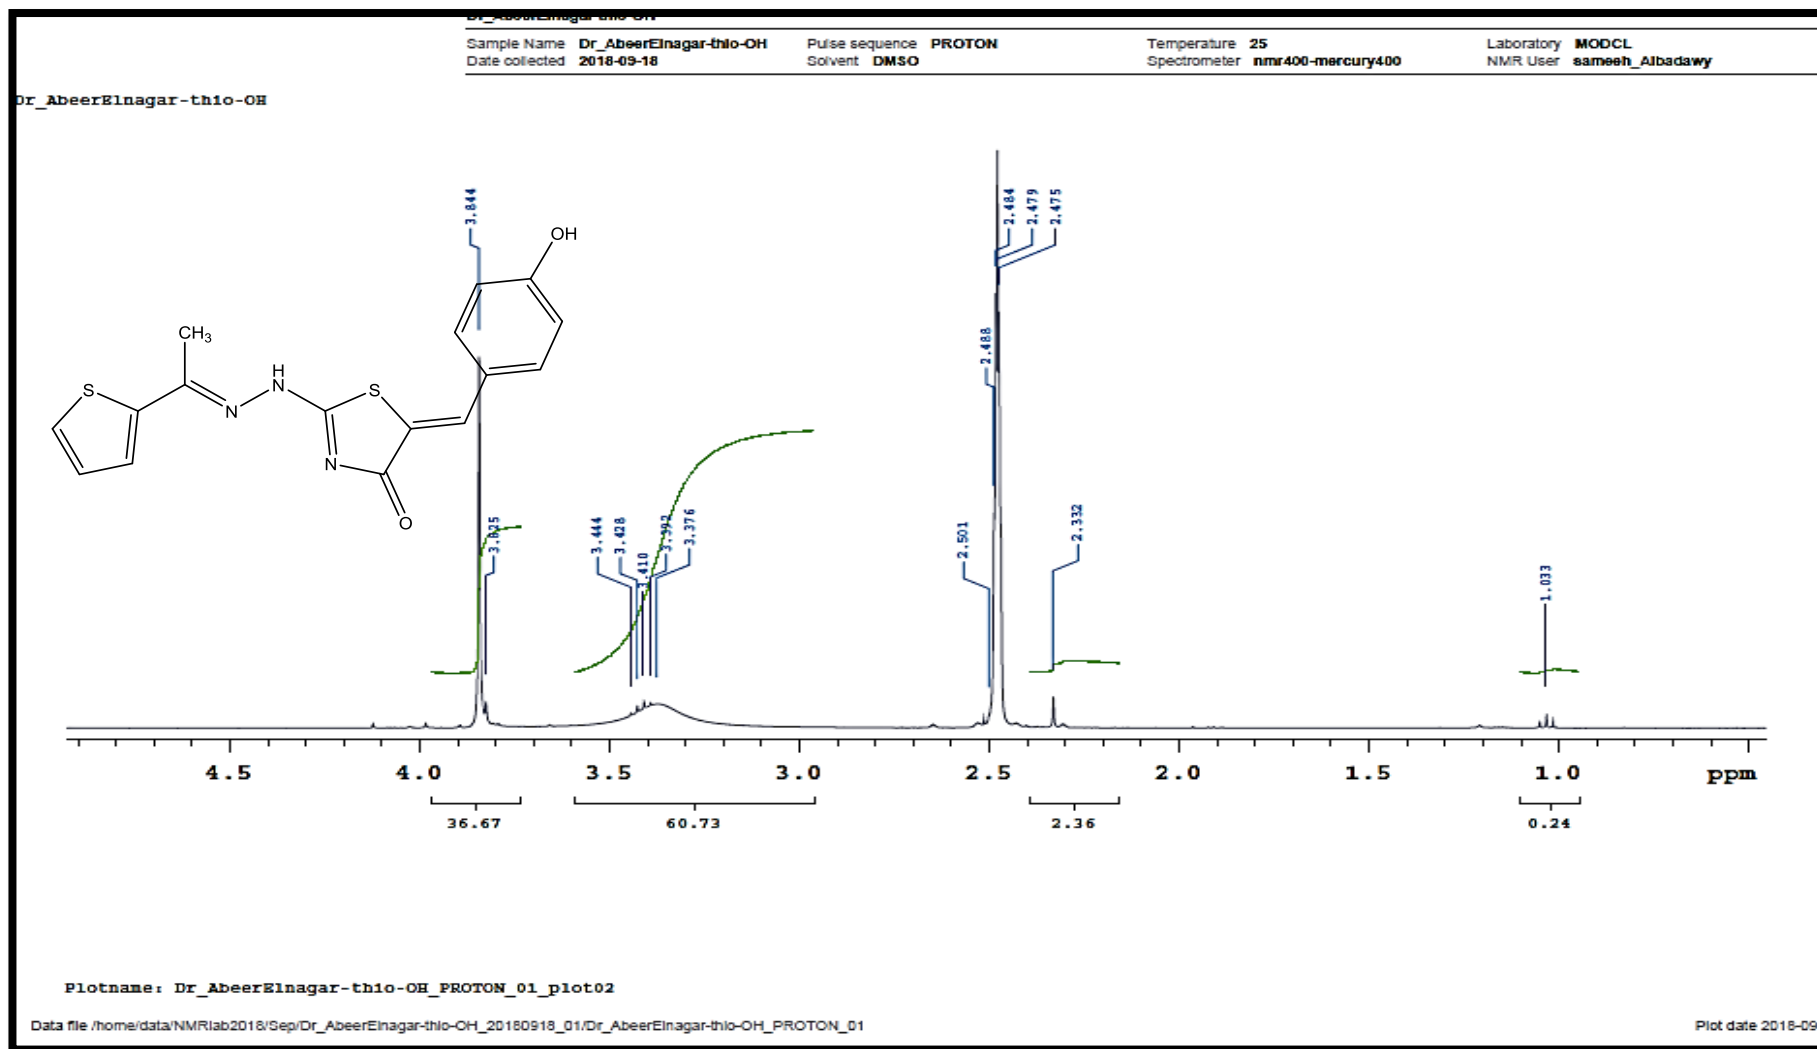

# <sup>1</sup>H NMR of compound (8c)

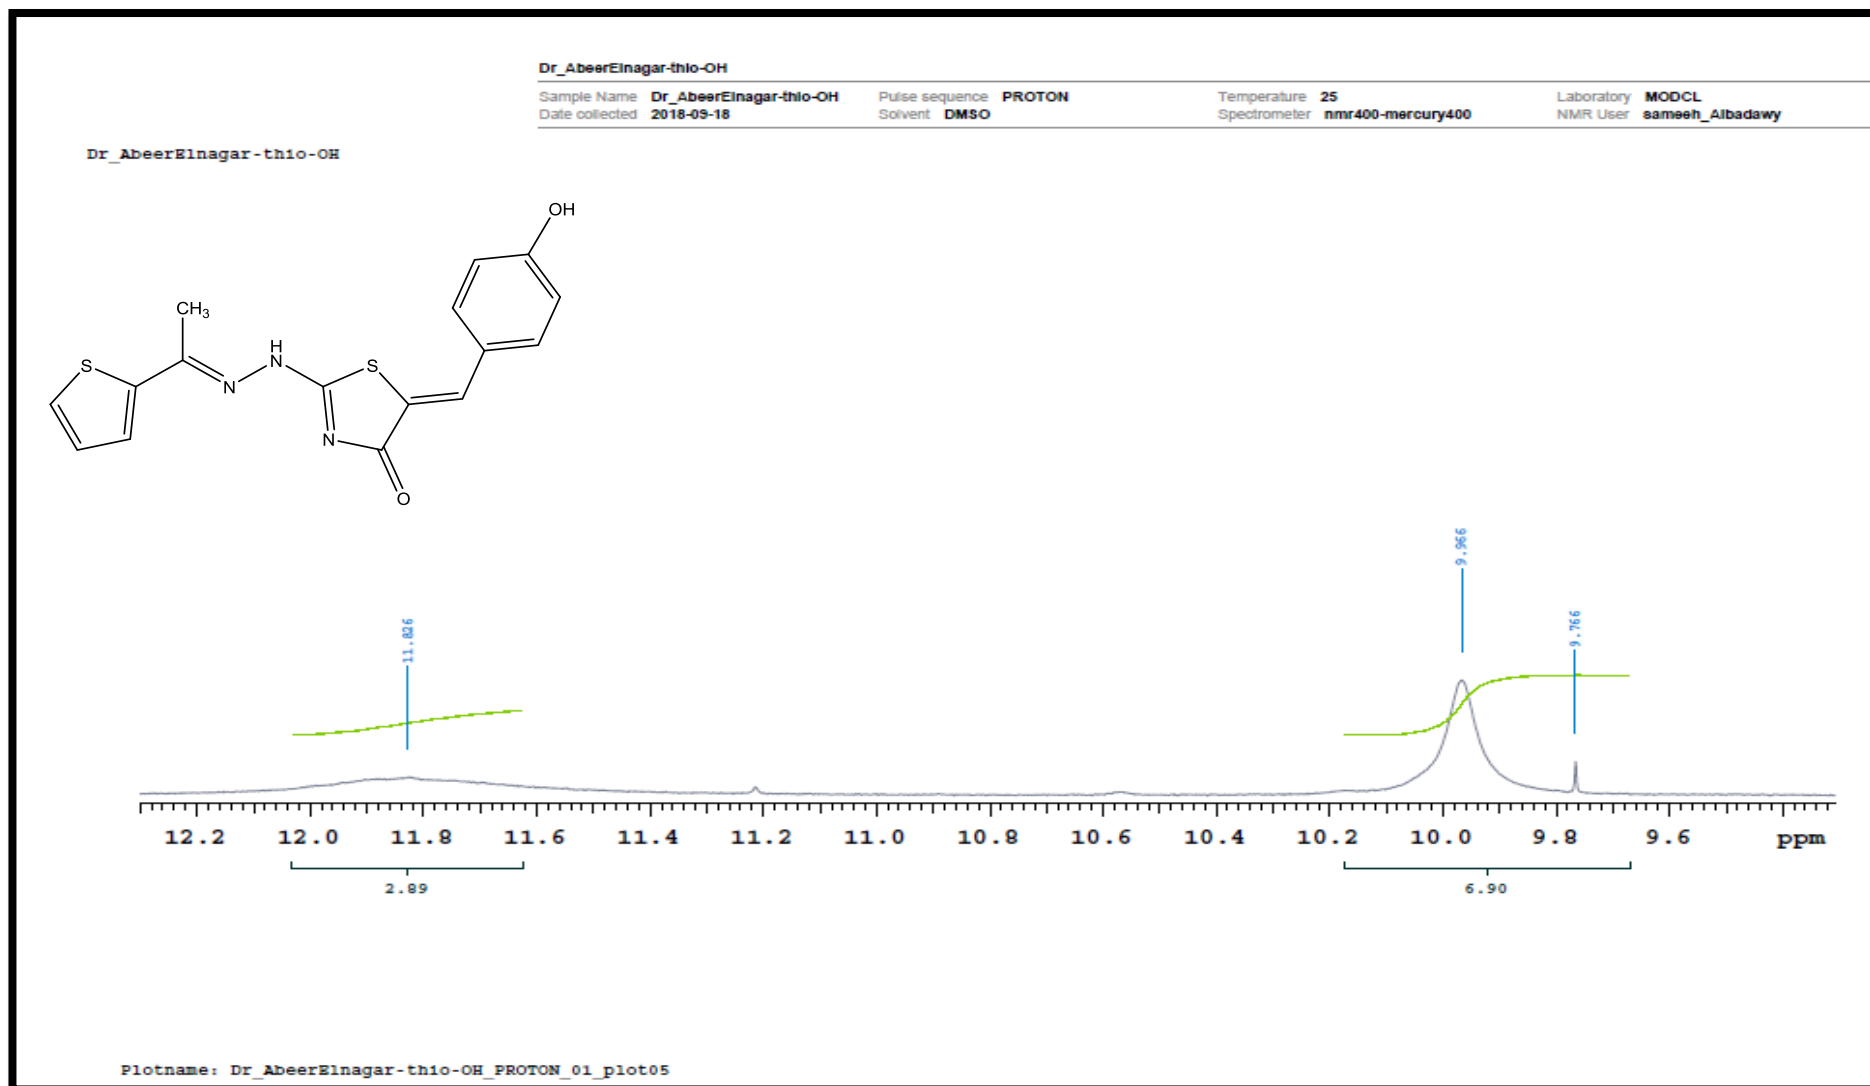

# IR of compound (8d)

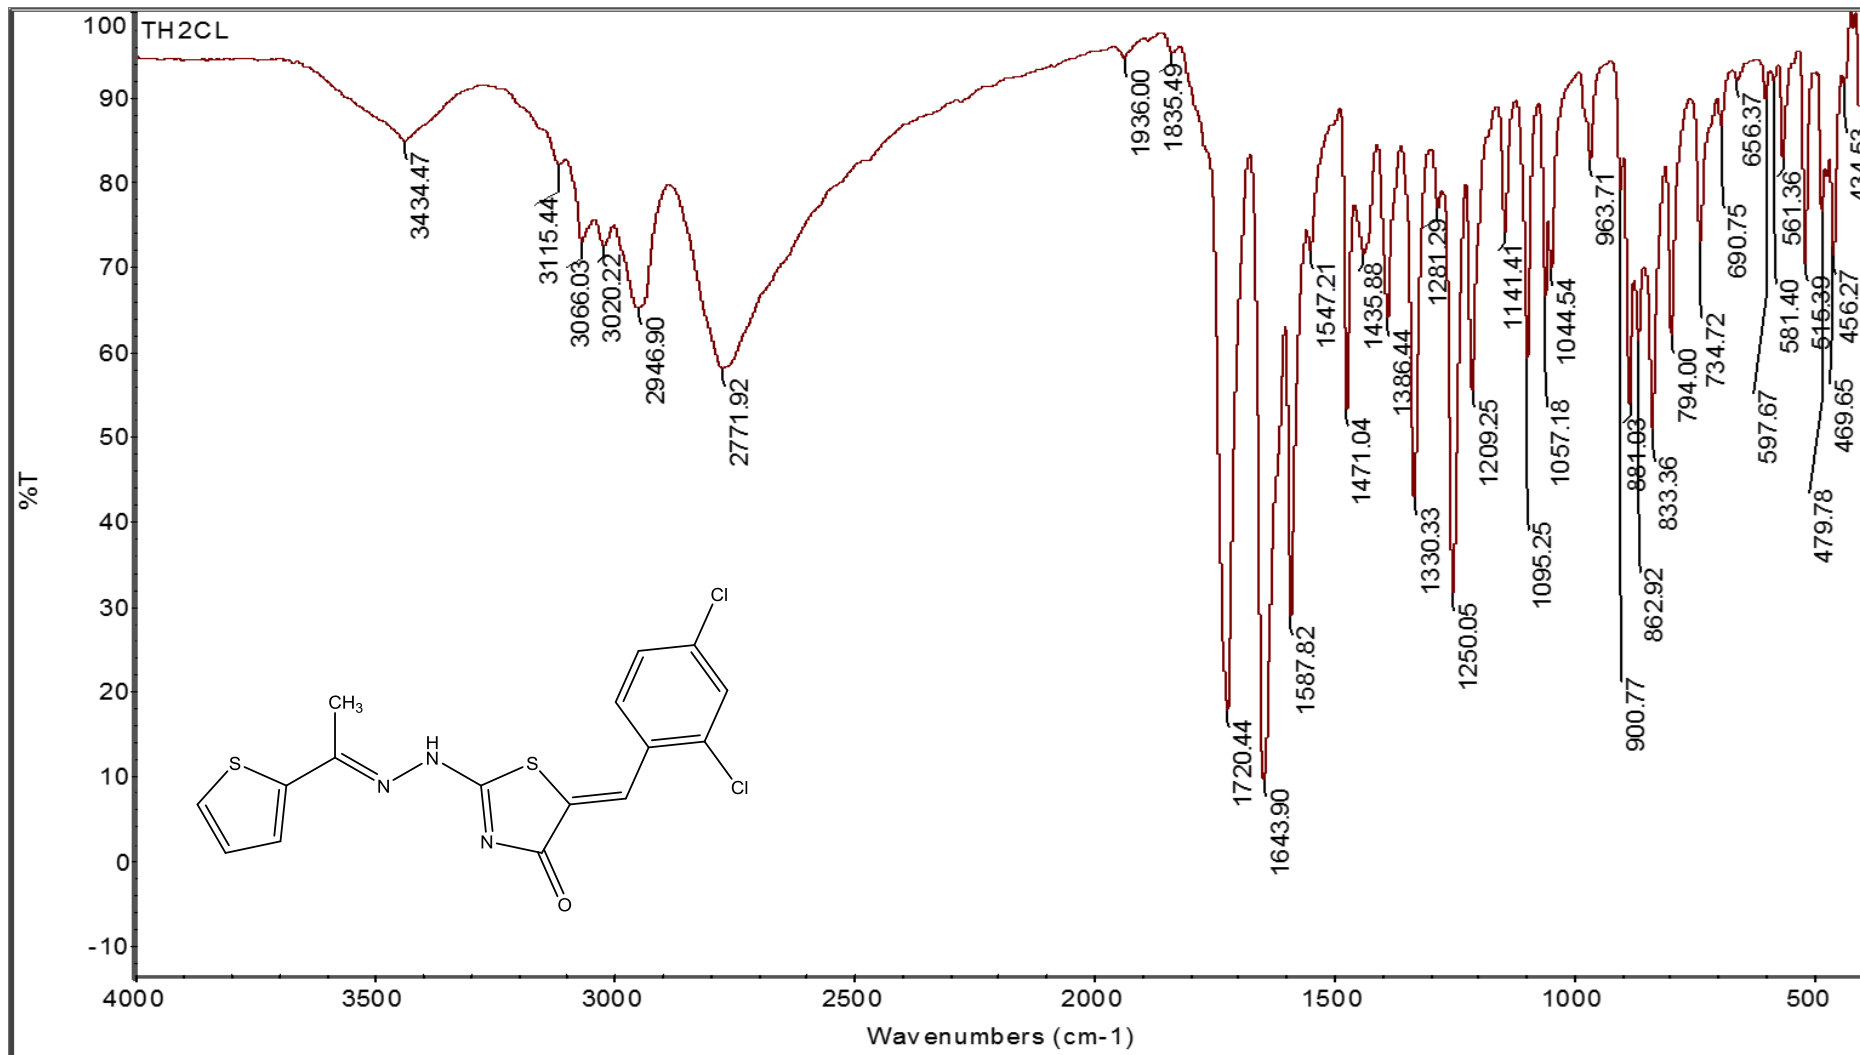

<sup>1</sup>H NMR of compound (8d)

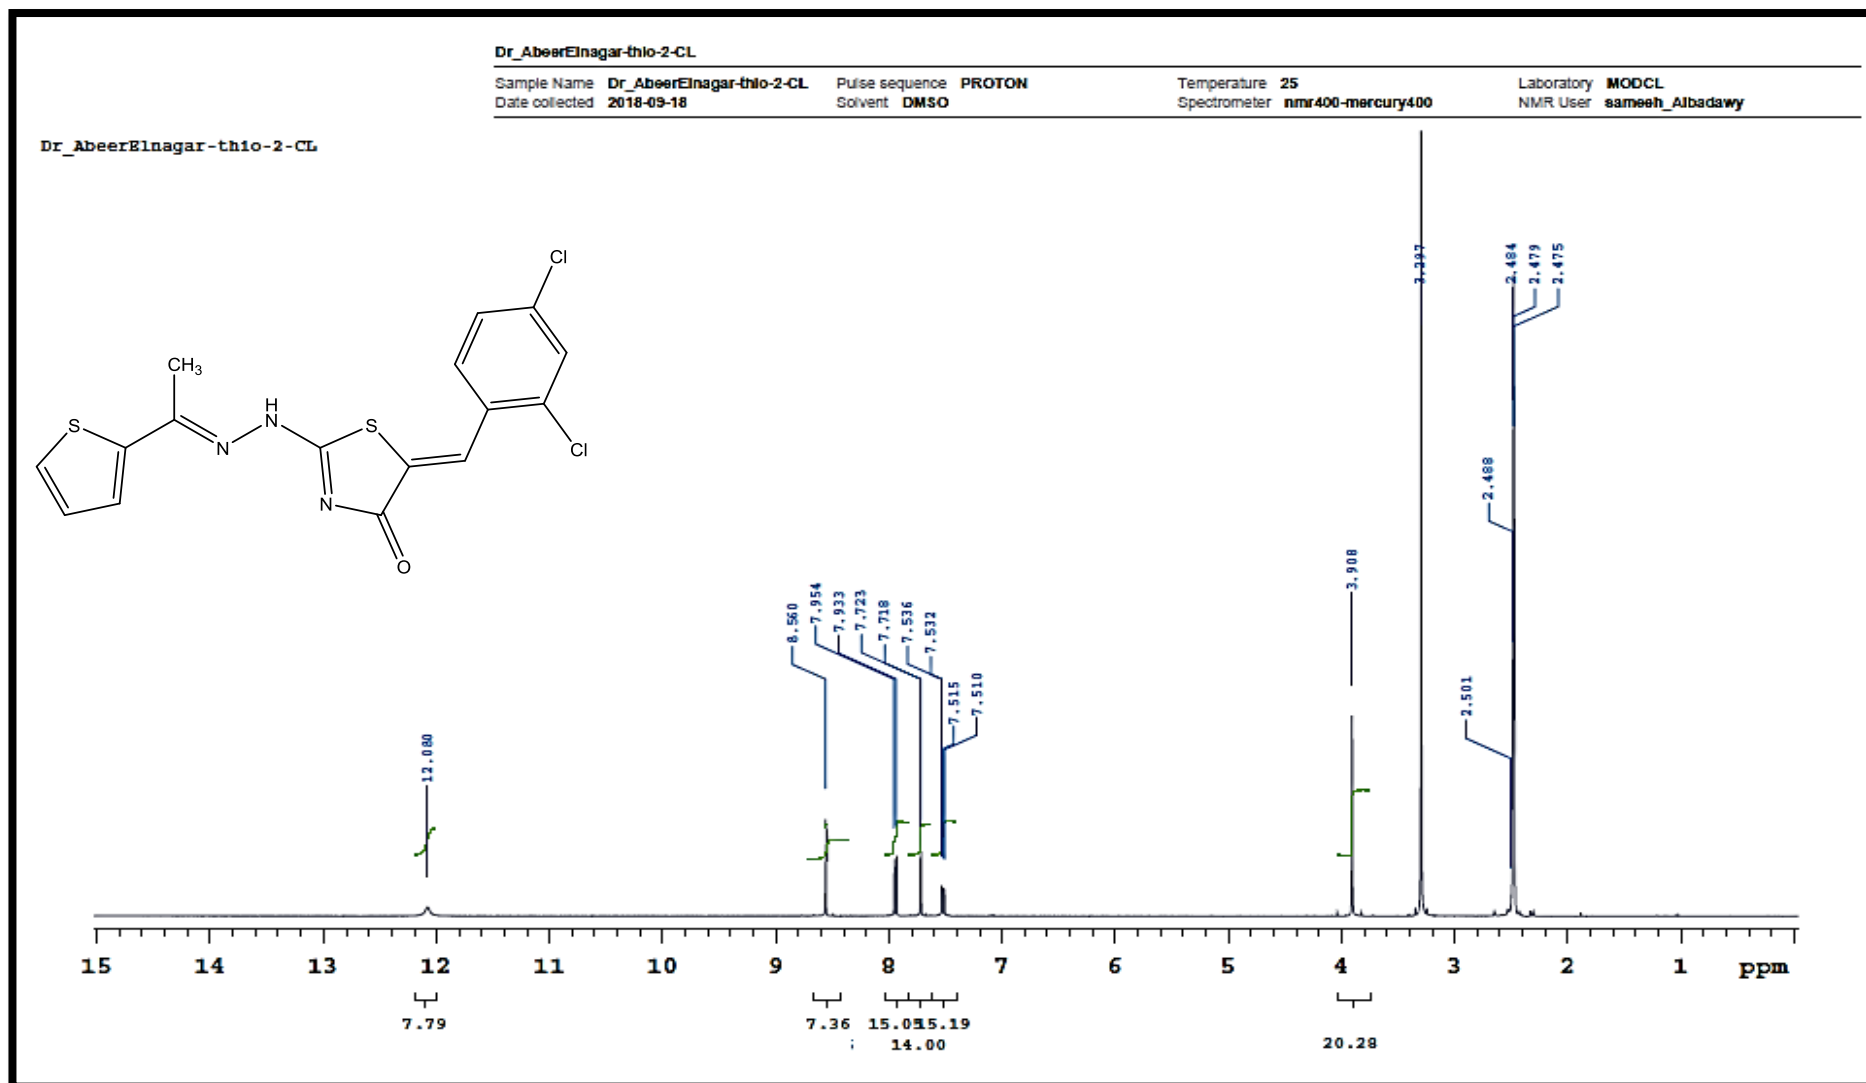



# D<sub>2</sub>O <sup>1</sup>H NMR of compound (8d)

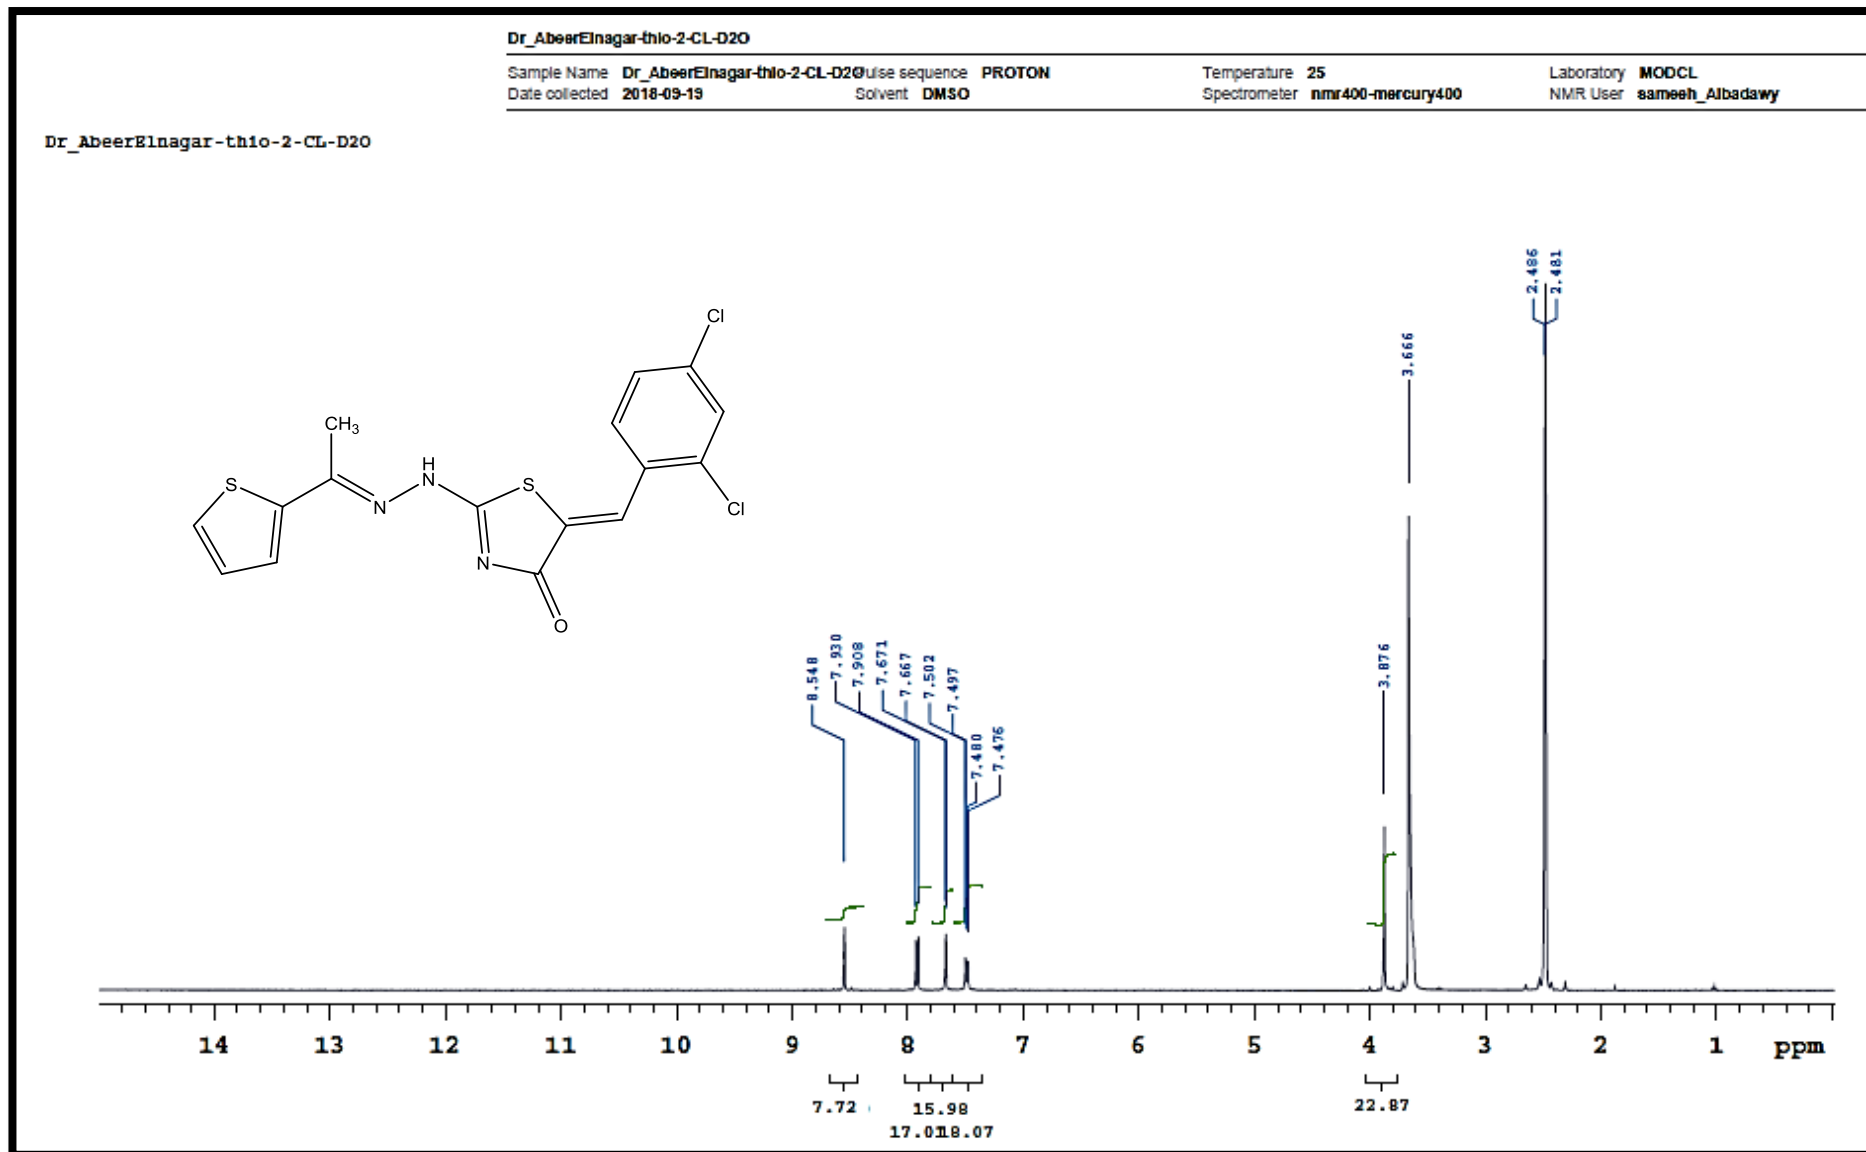

# IR of compound (8e)

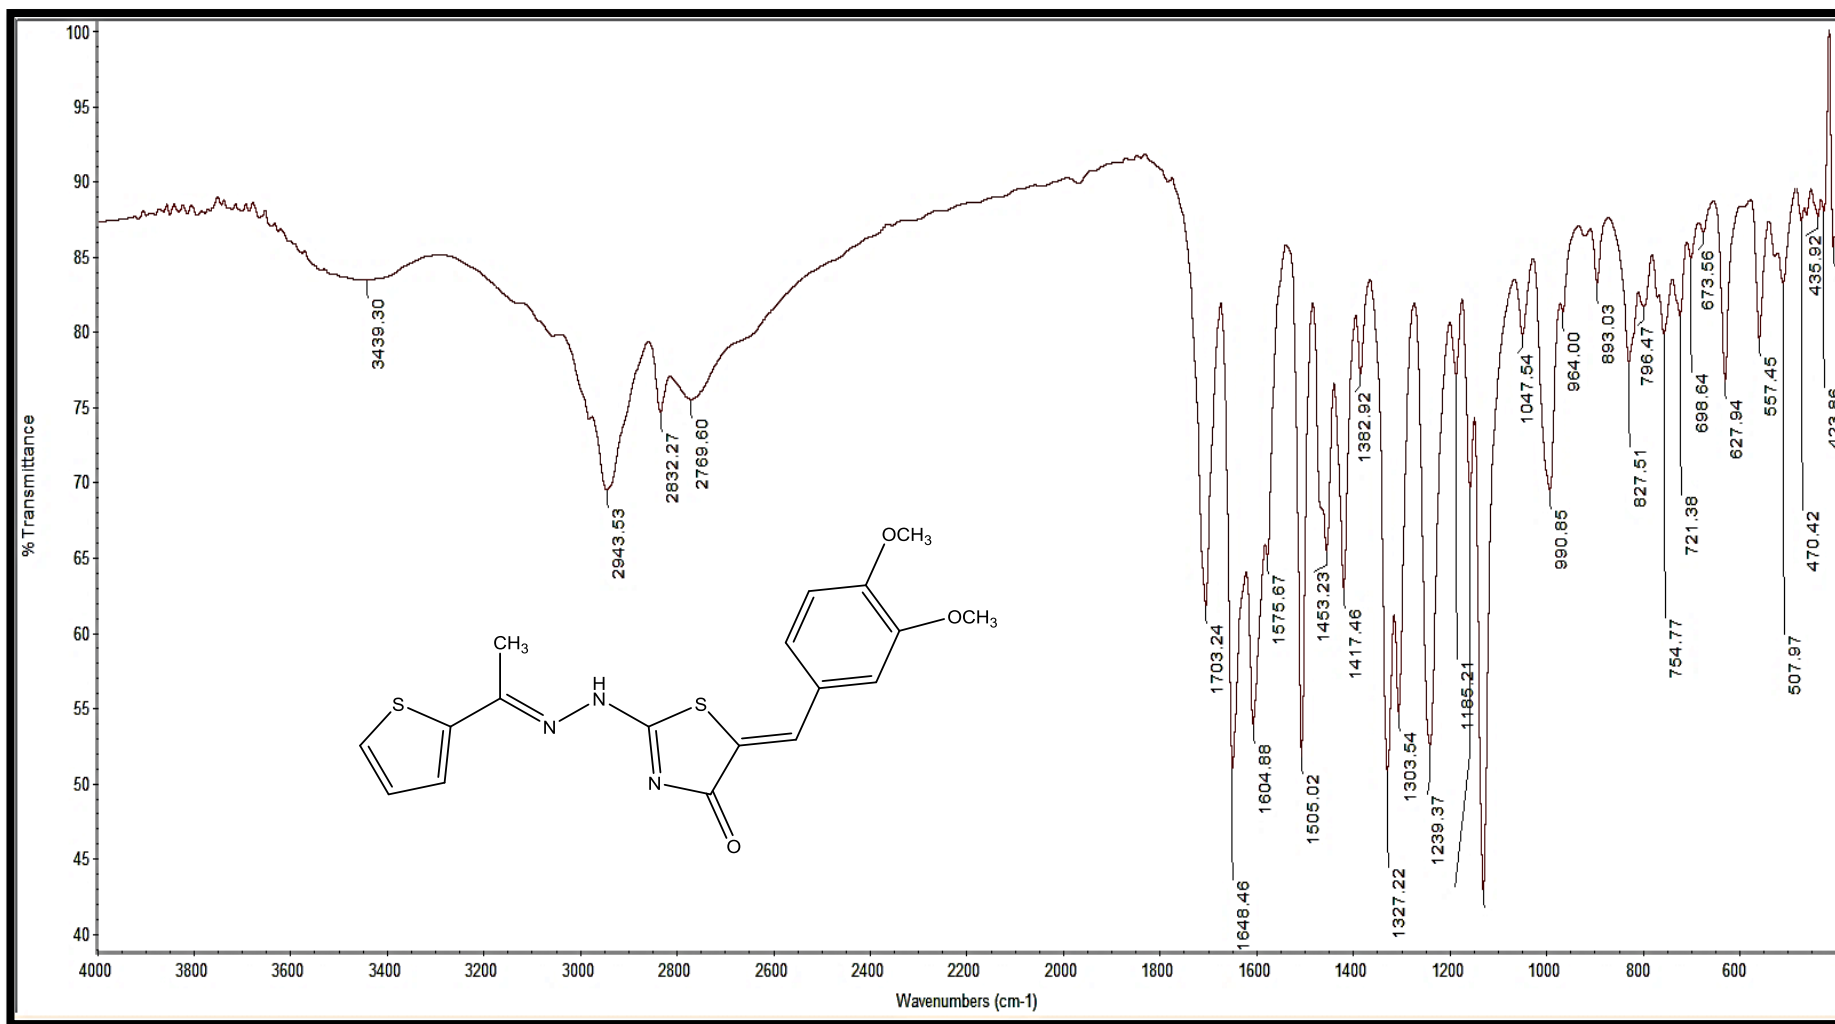

# <sup>1</sup>H NMR of compound (8e)

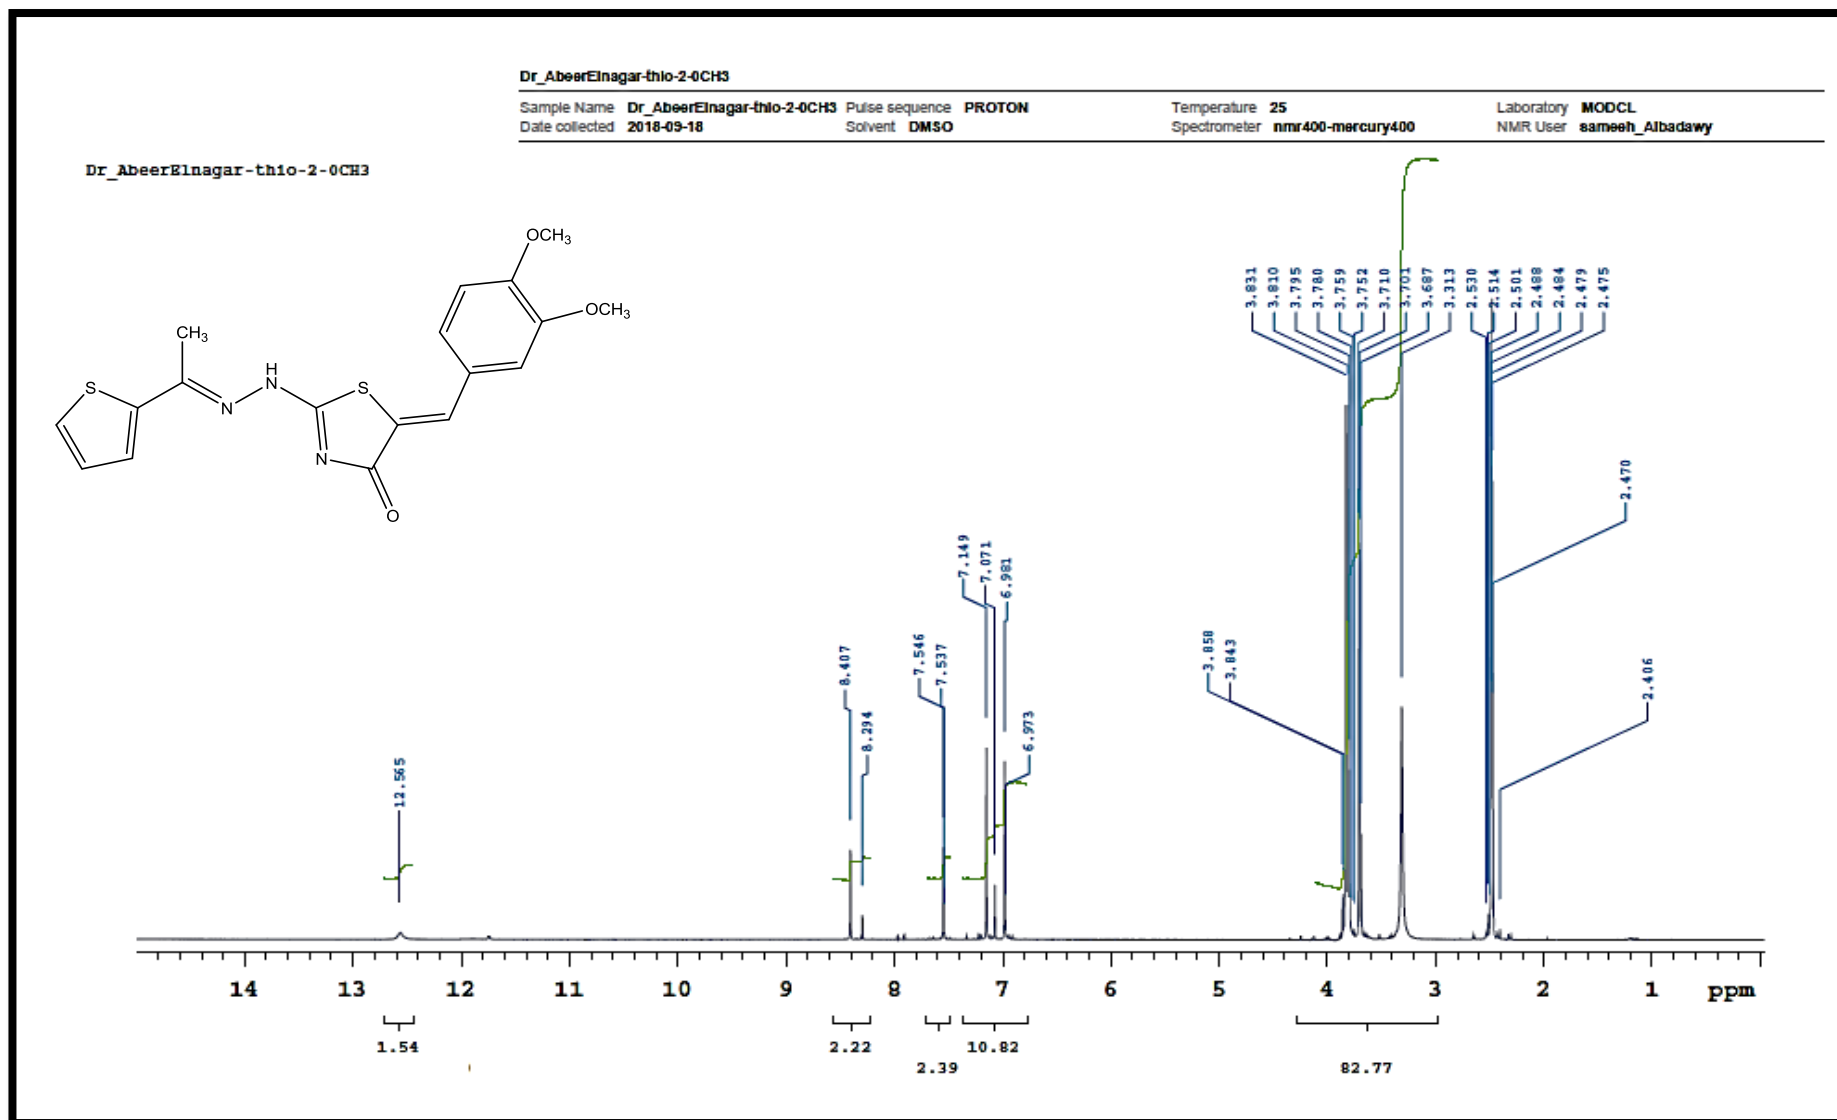

# <sup>1</sup>H NMR of compound (8e)

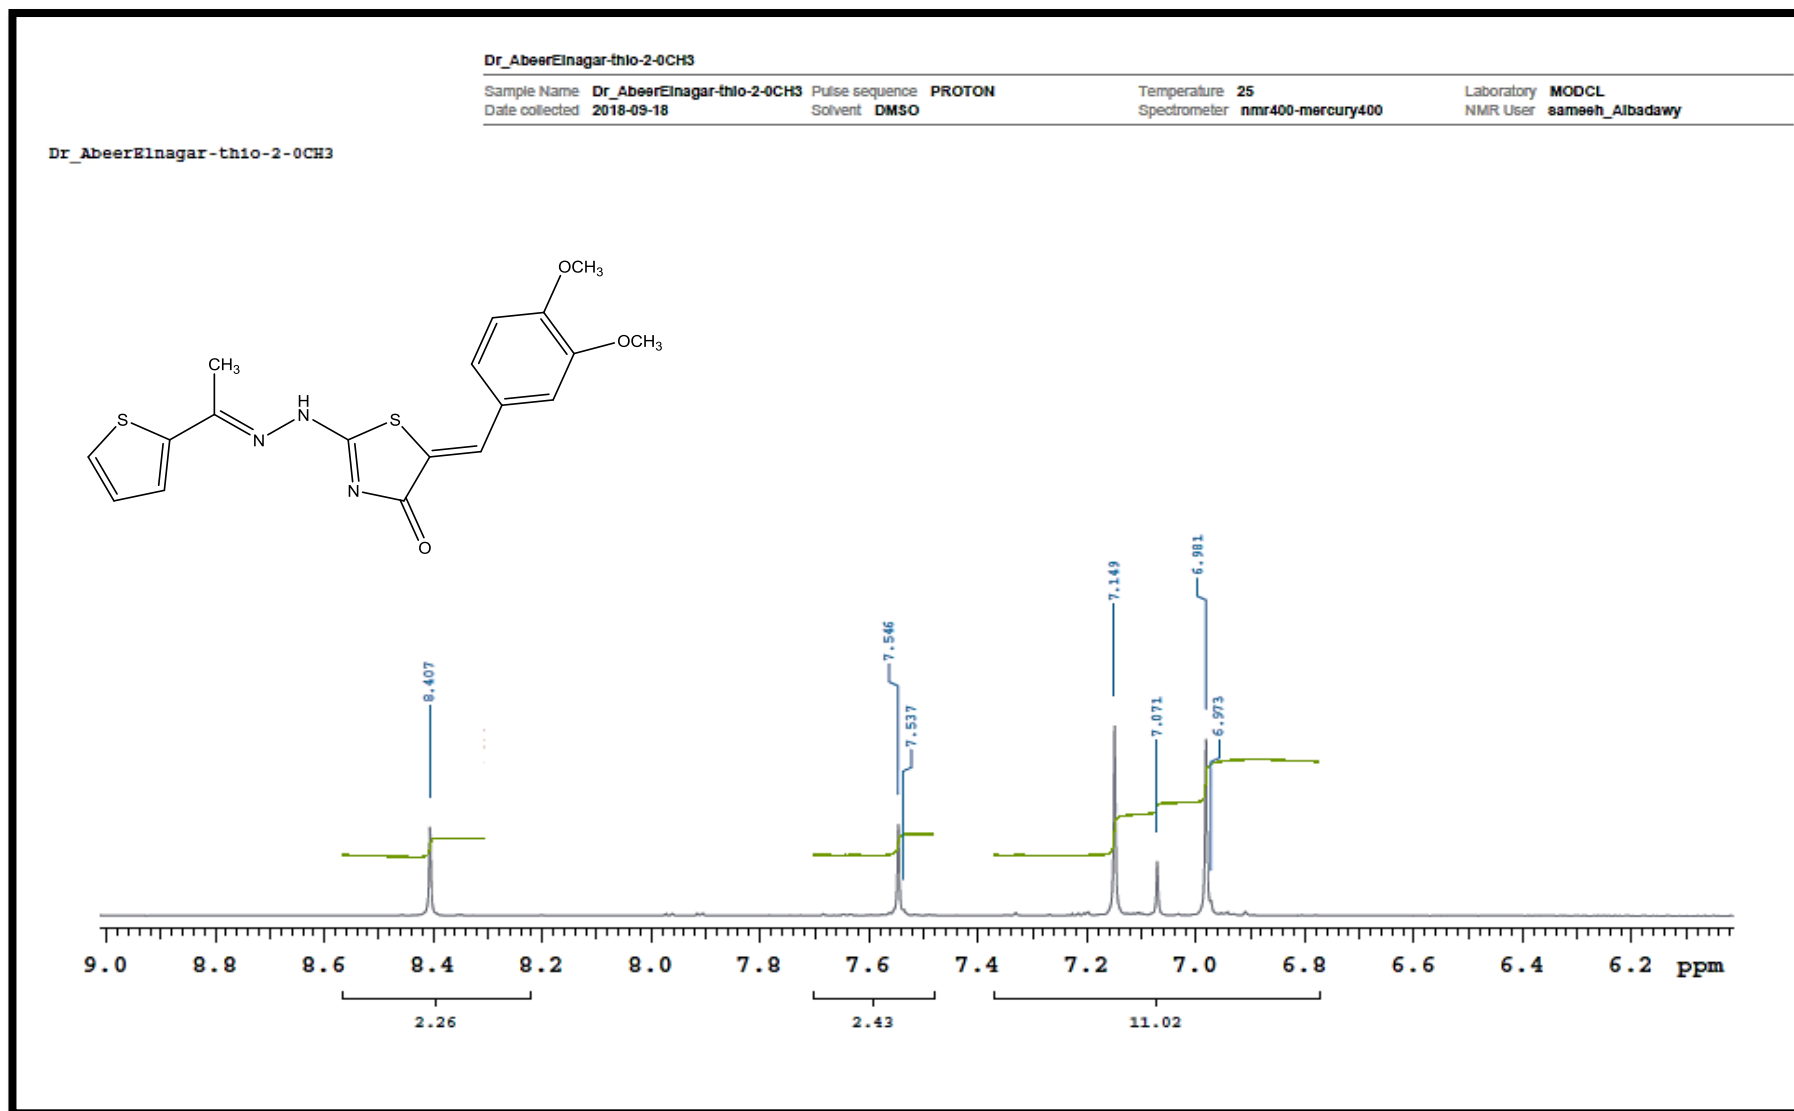

# IR of compound (8f)

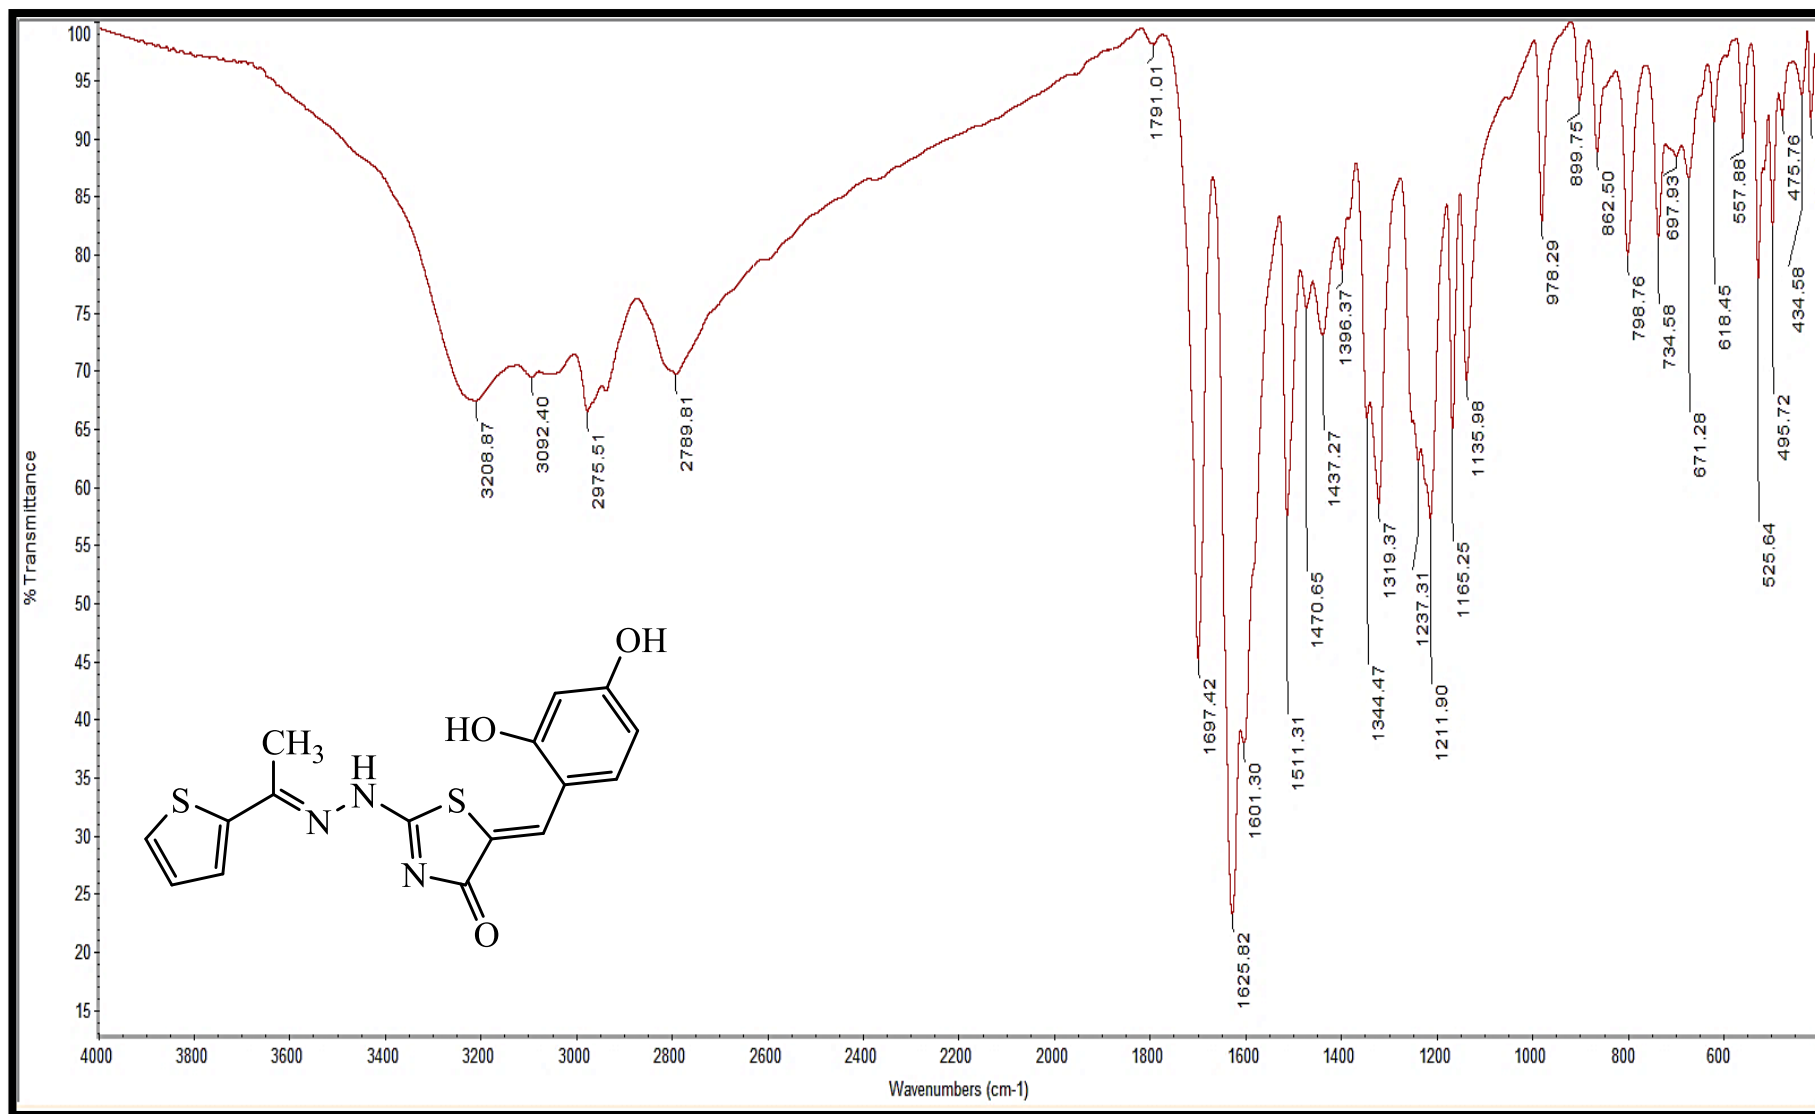

# <sup>1</sup>H NMR of compound (8f)

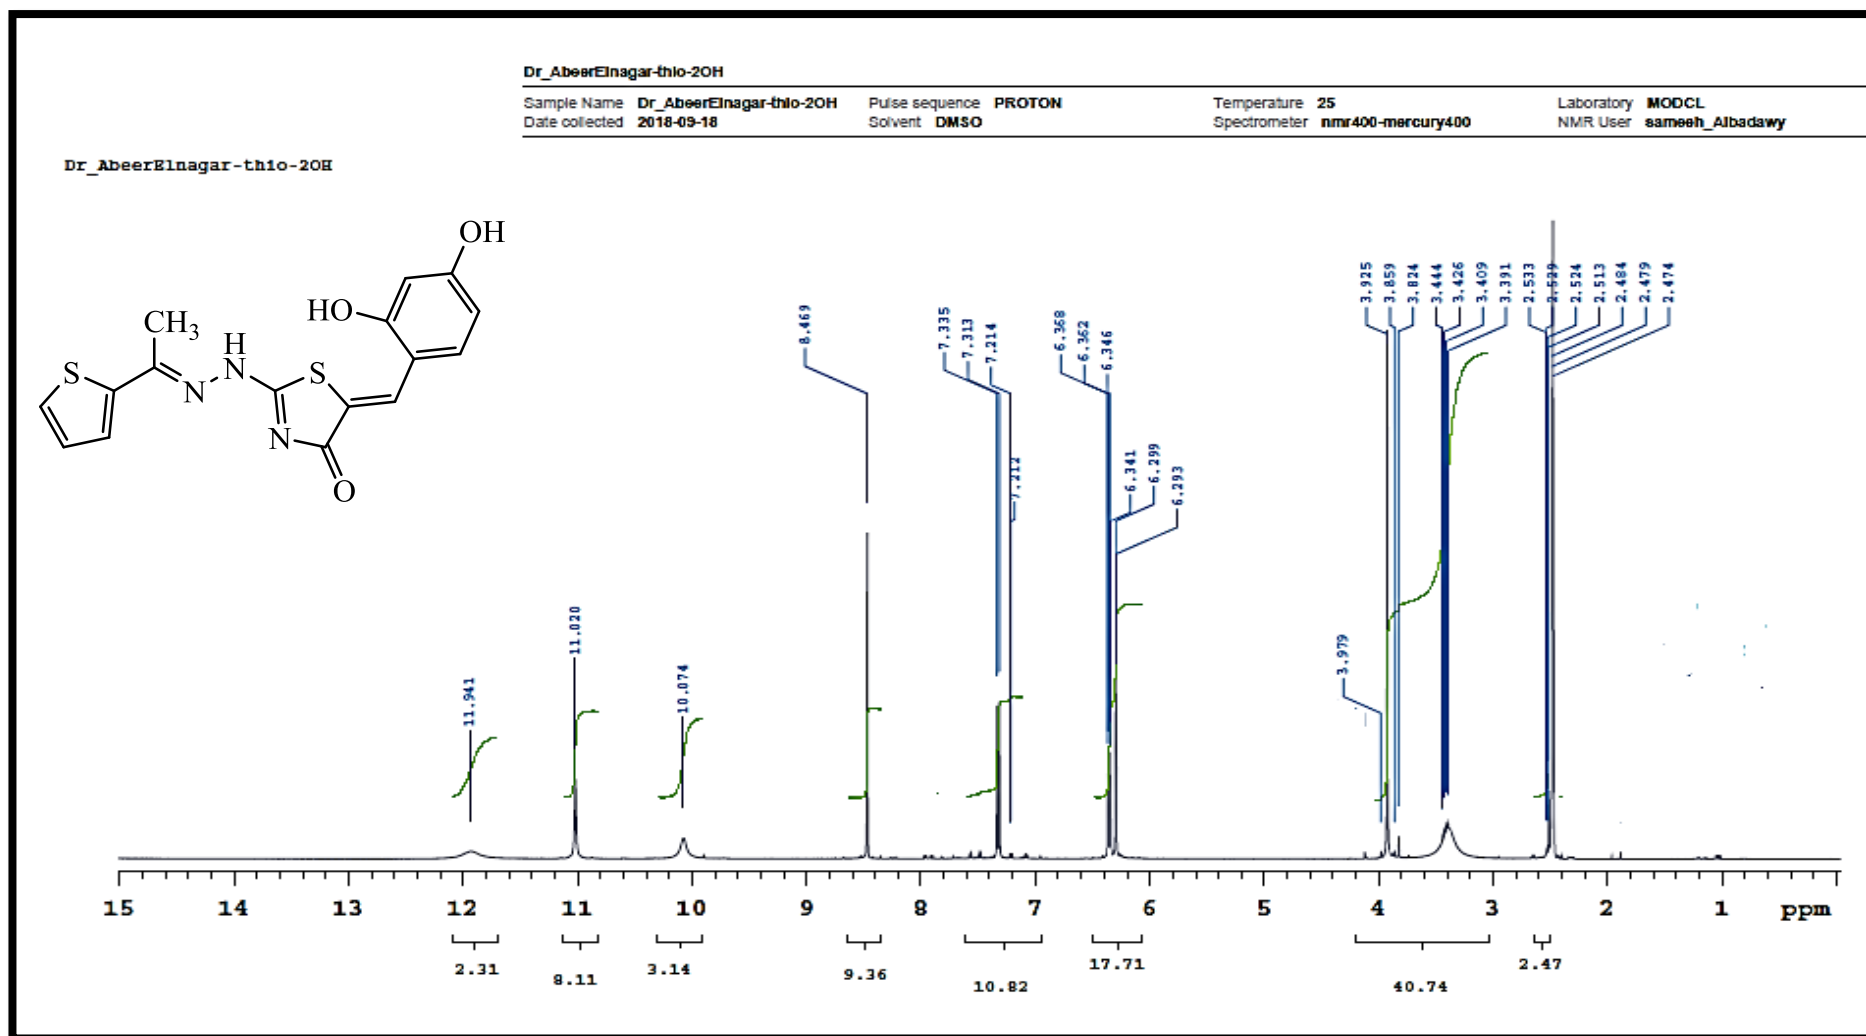

# D<sub>2</sub>O <sup>1</sup>H NMR of compound (8f)

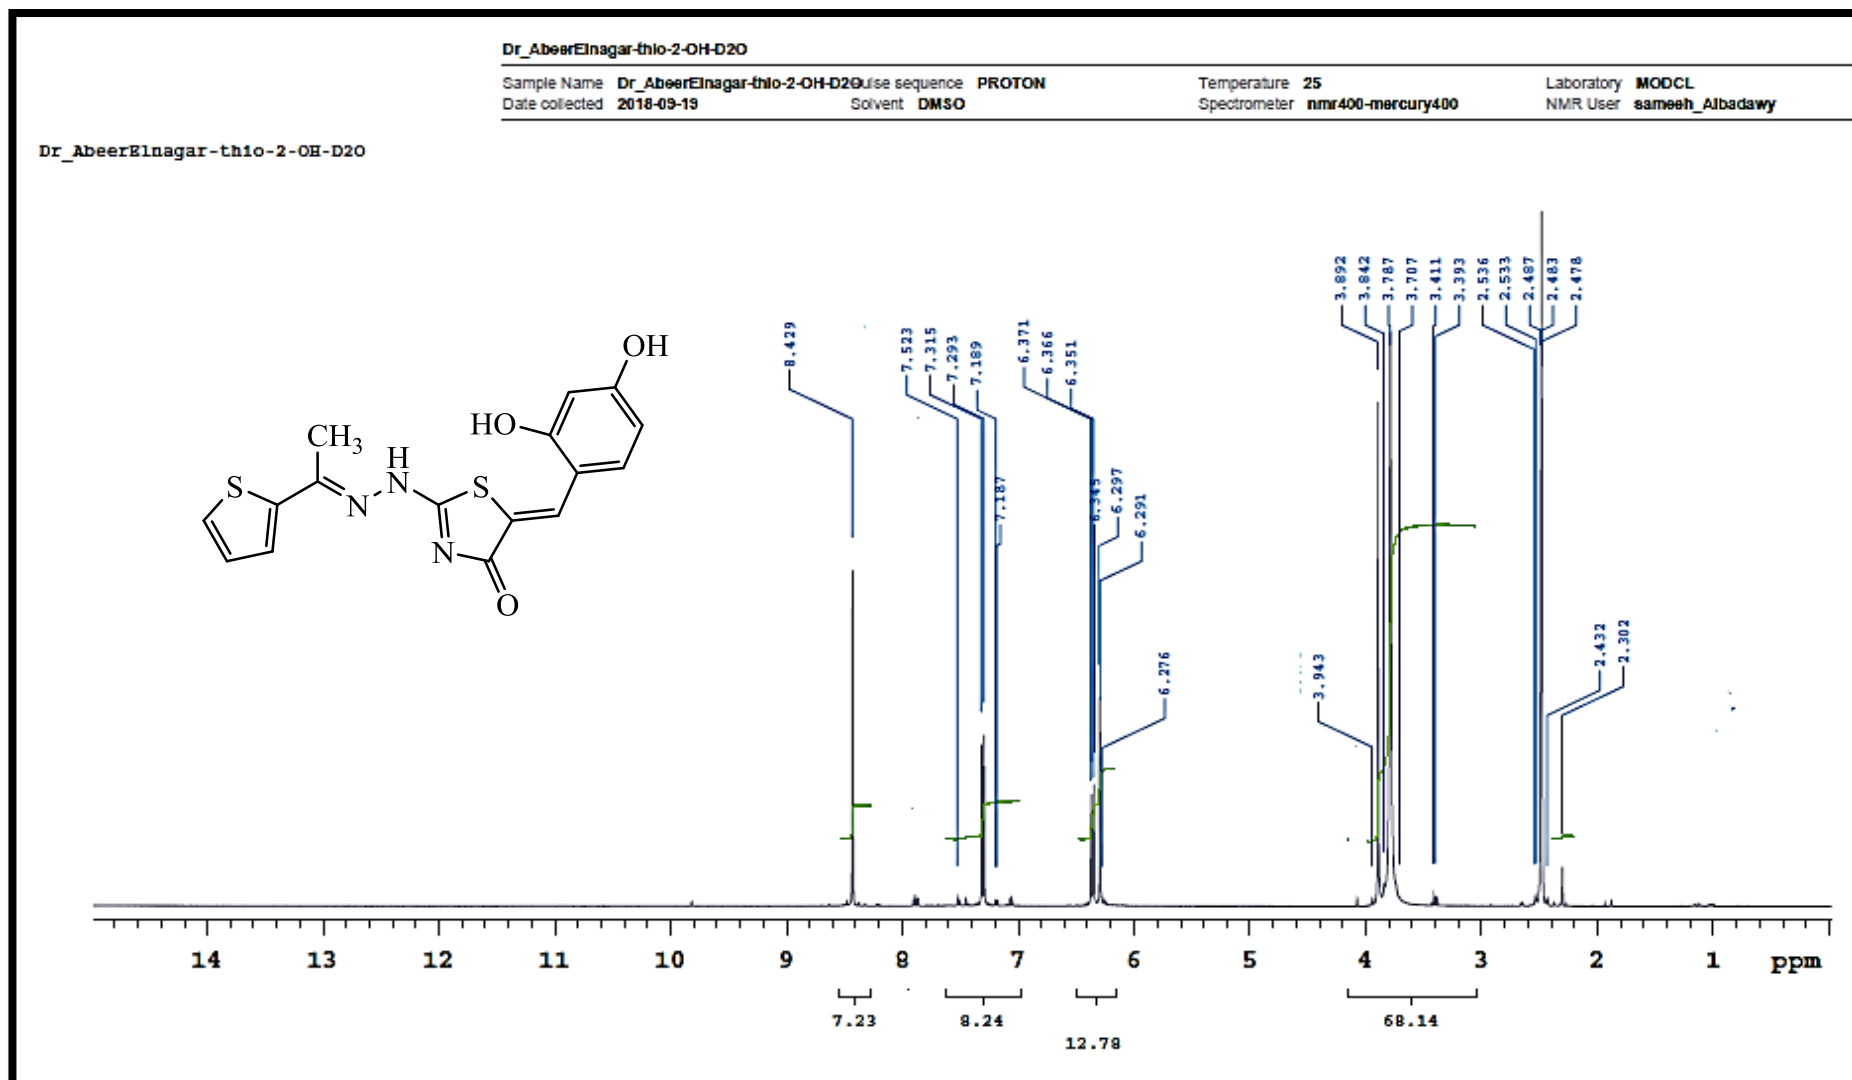

# IR of compound (8g)

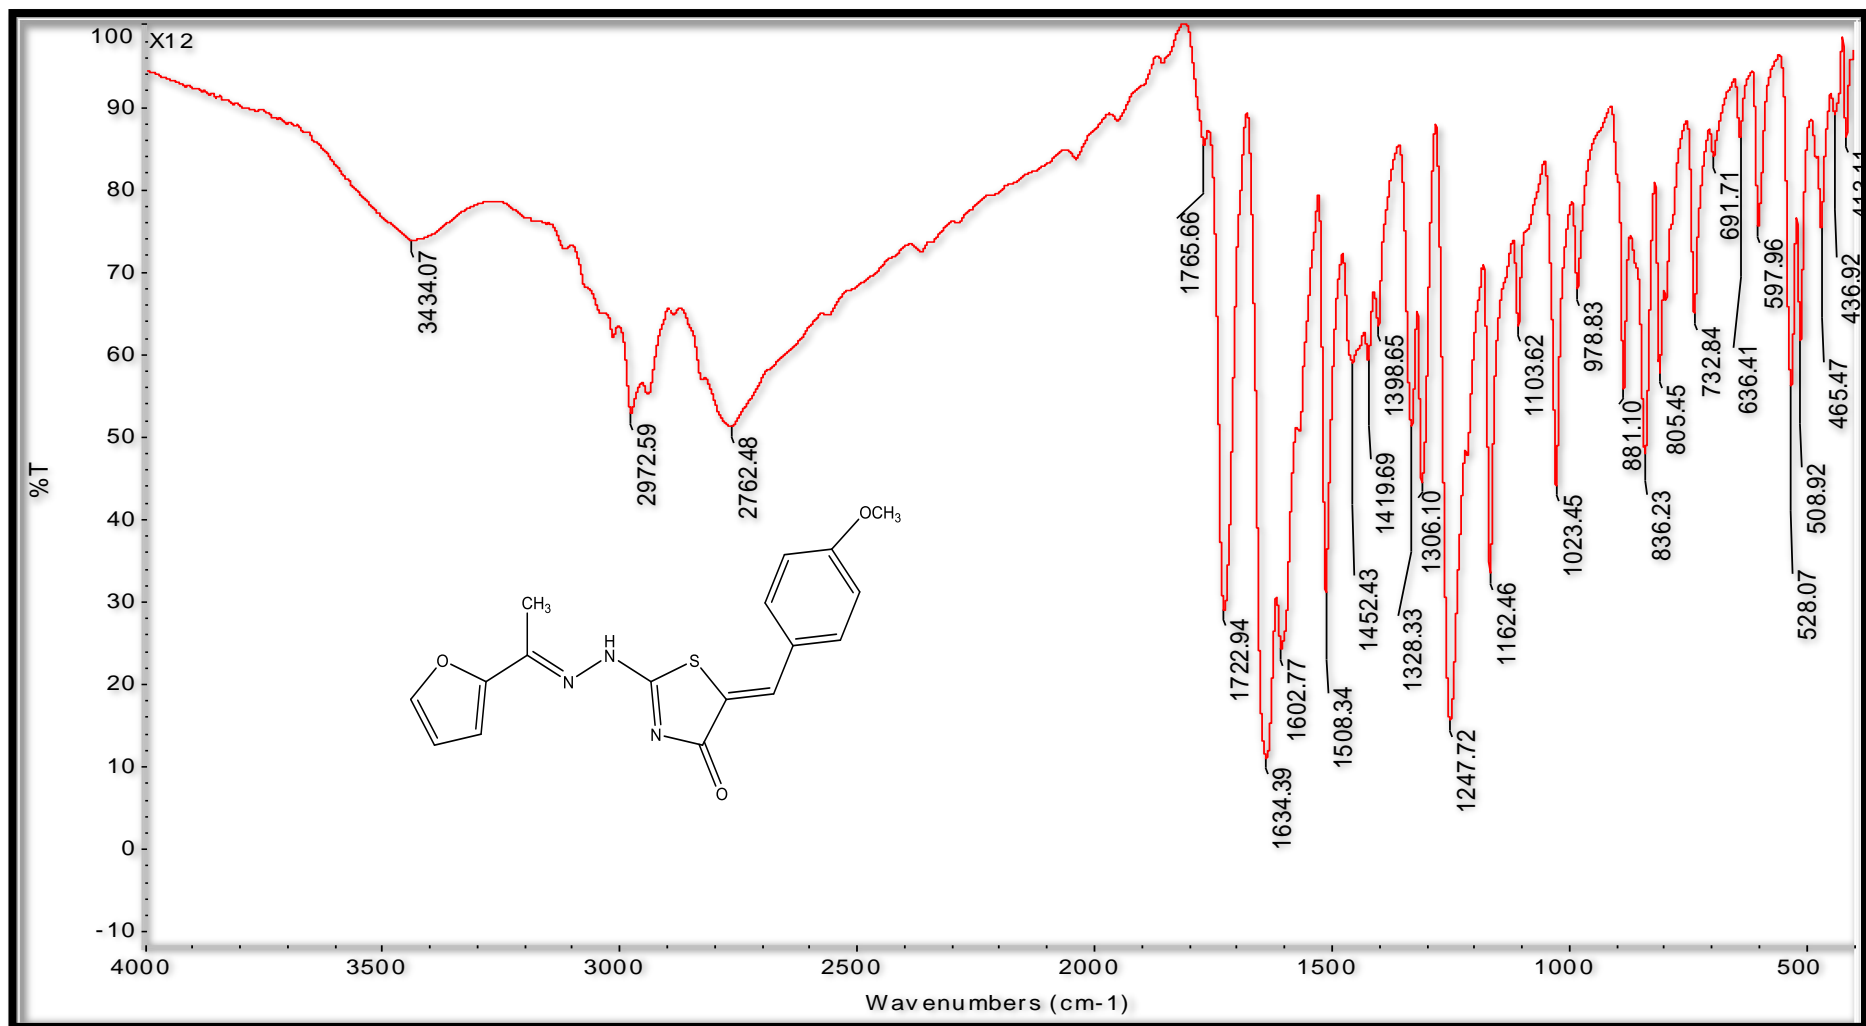



# <sup>1</sup>H NMR of compound (8g)

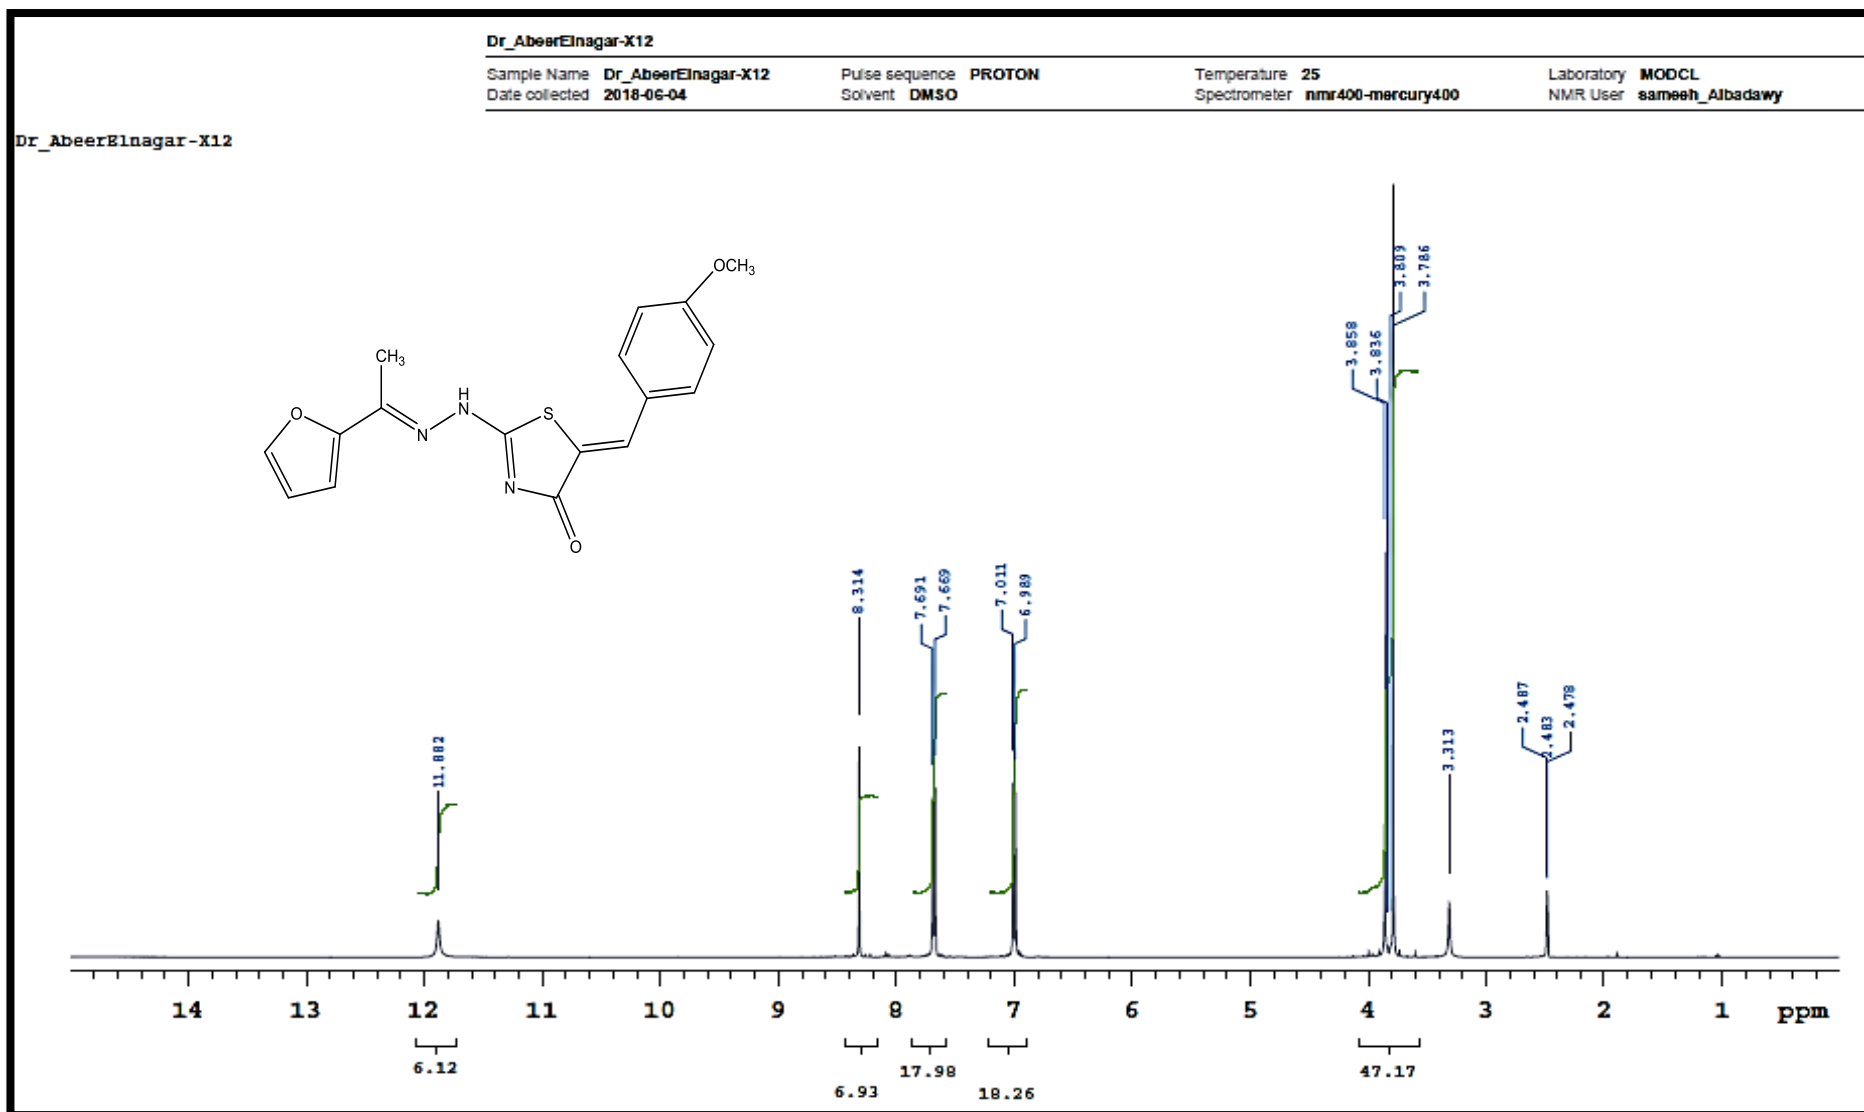

# D<sub>2</sub>O <sup>1</sup>H NMR of compound (8g)

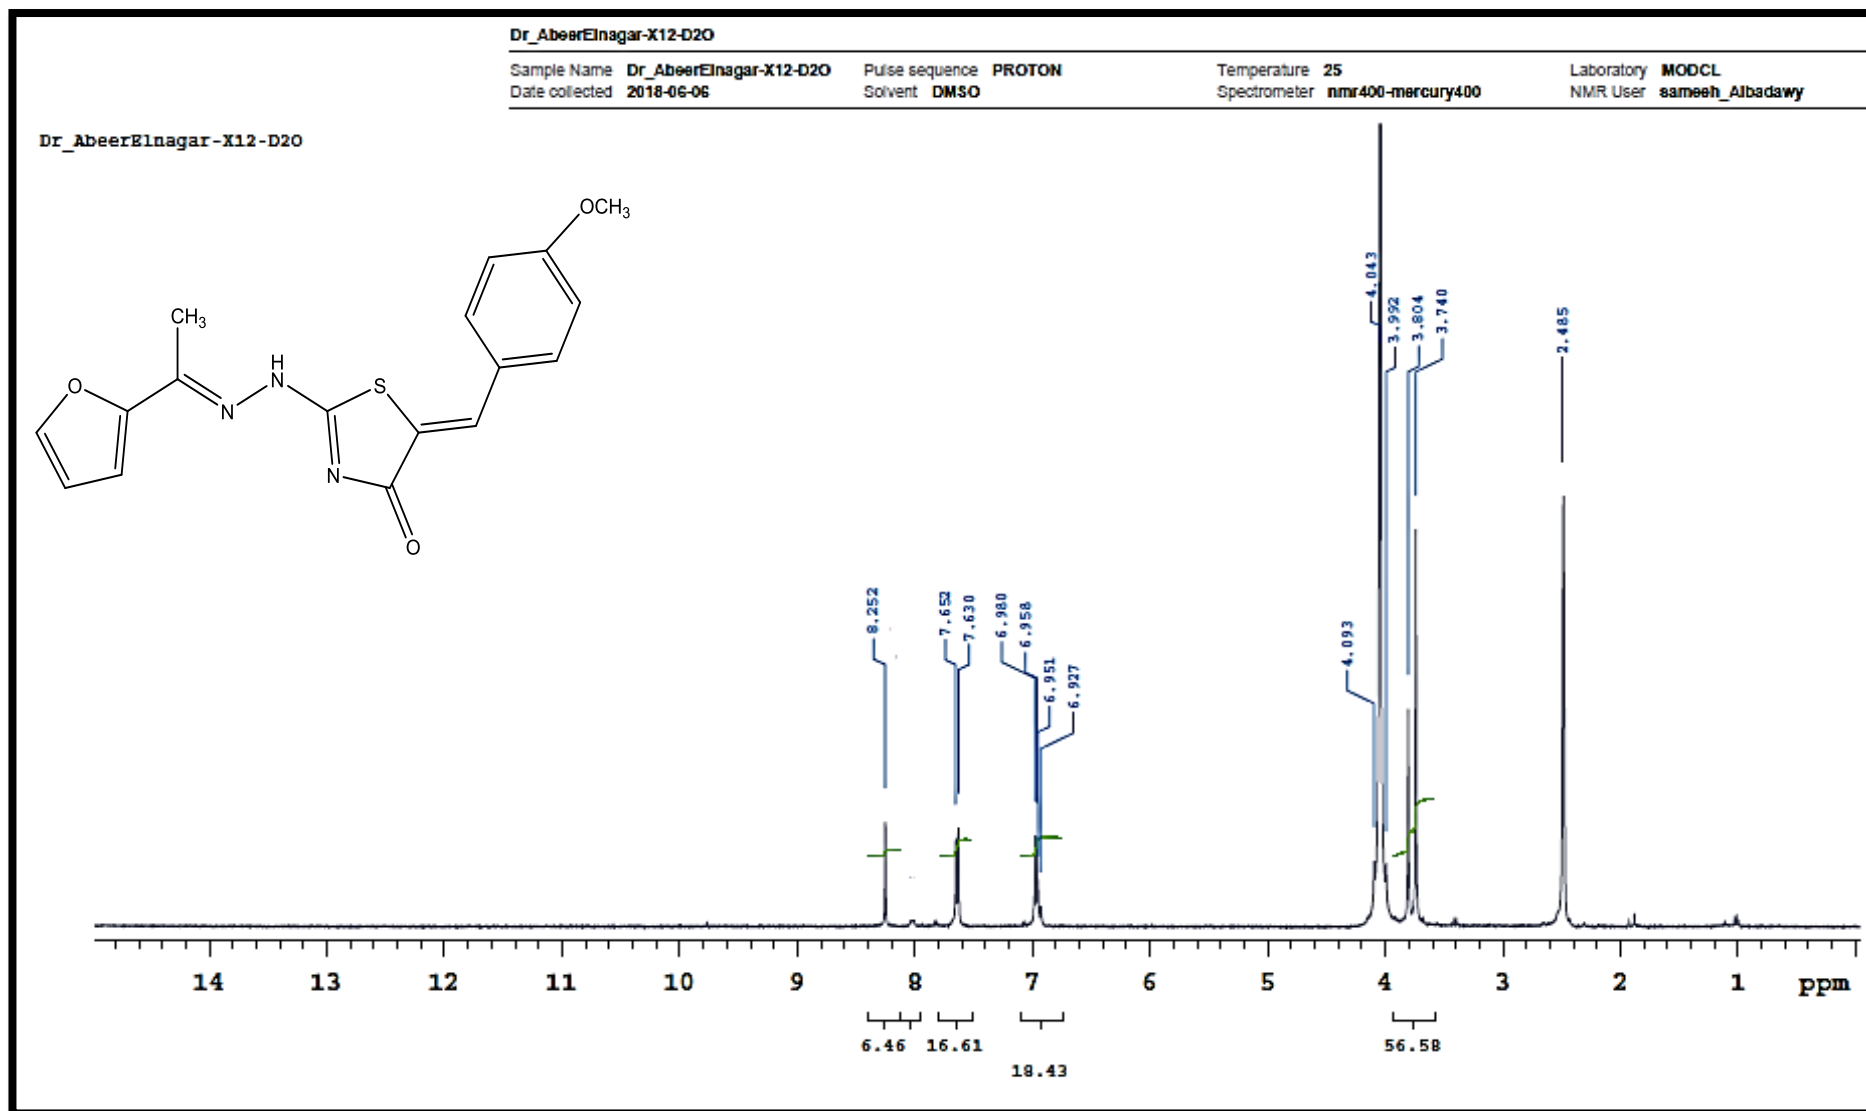

# IR of compound (8h)

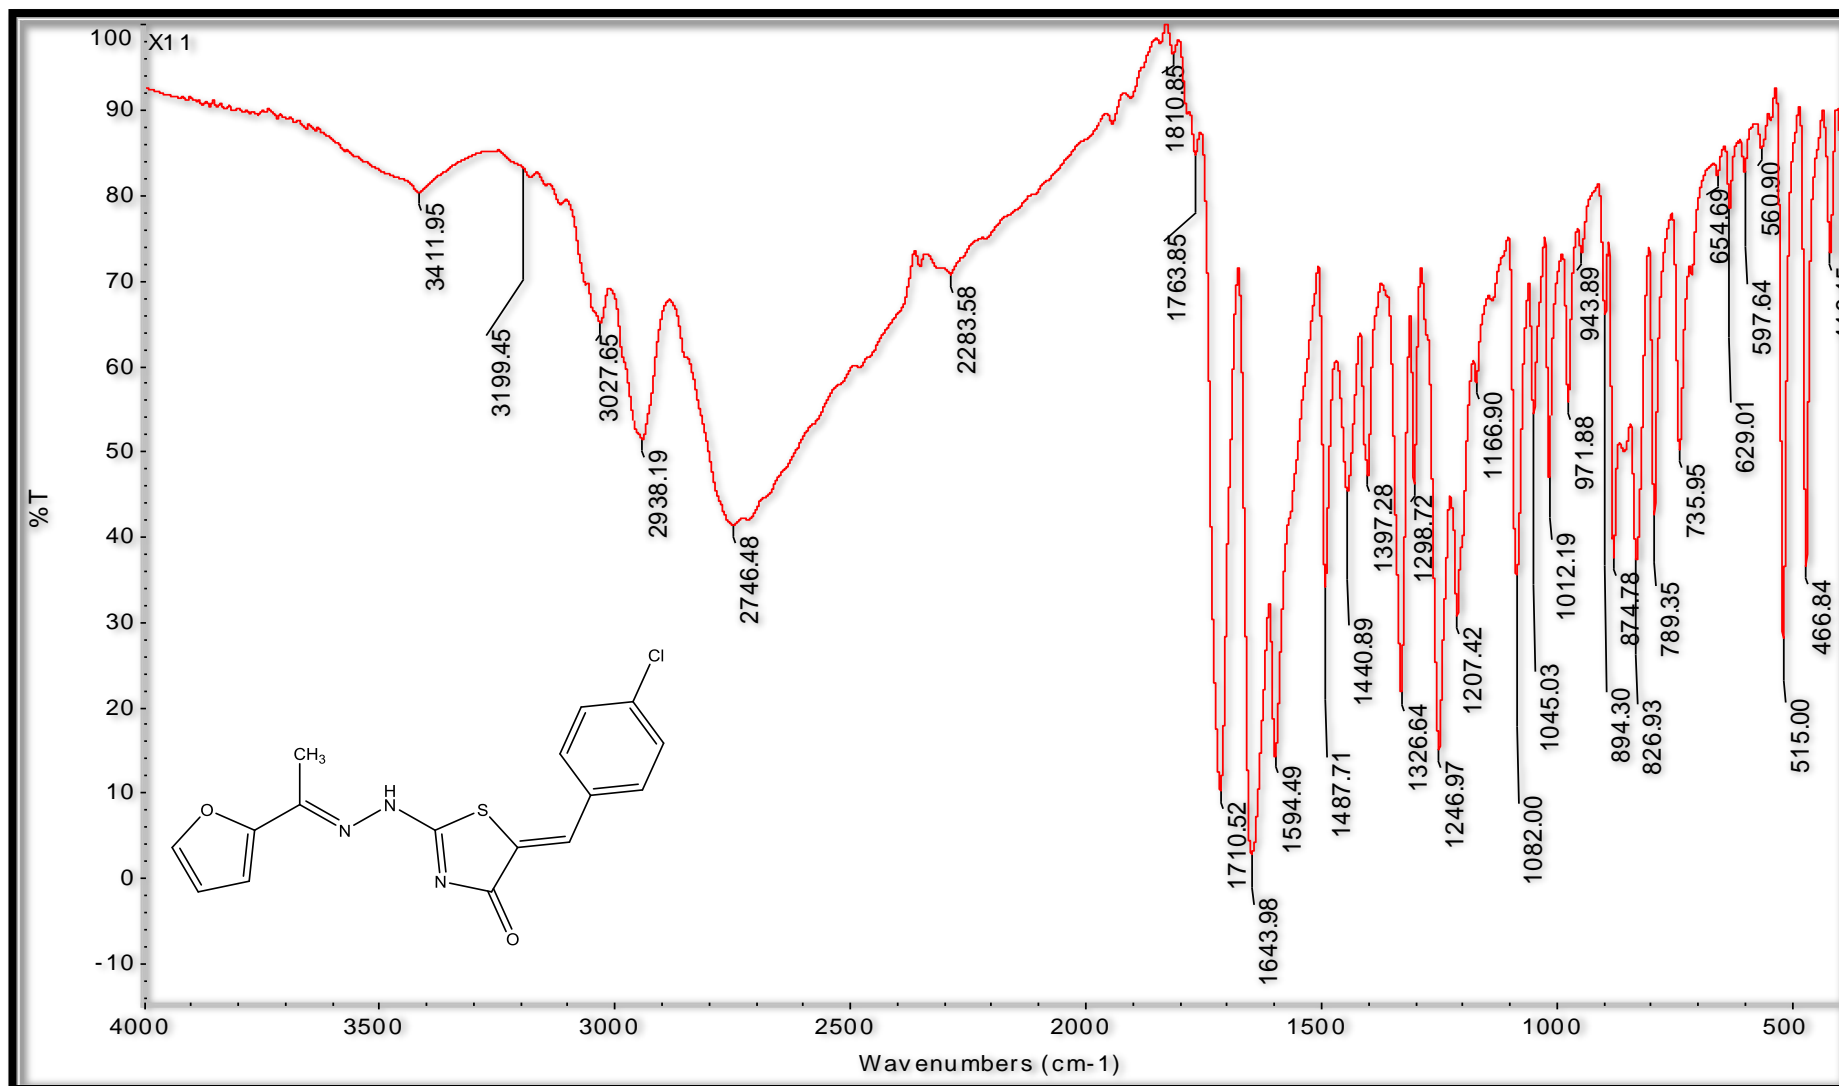

# <sup>1</sup>H NMR of compound (8h)

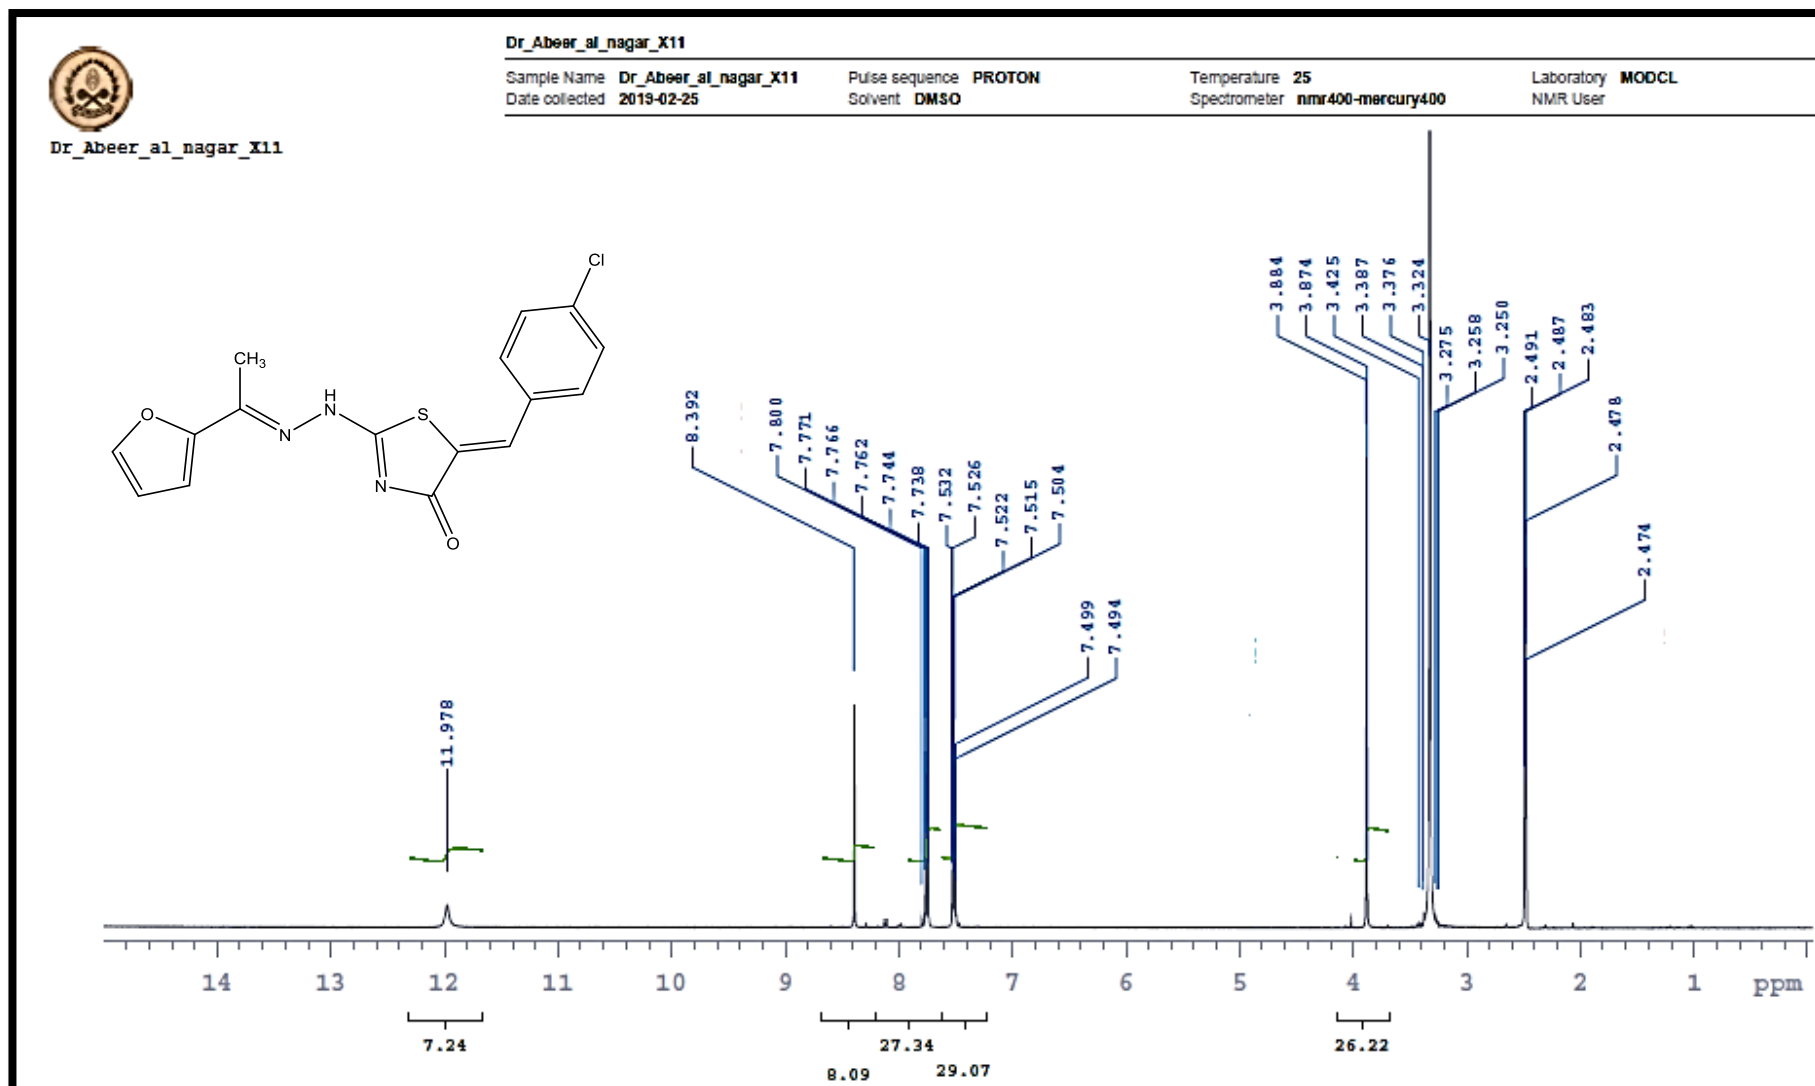

# D<sub>2</sub>O <sup>1</sup>H NMR of compound (8h)

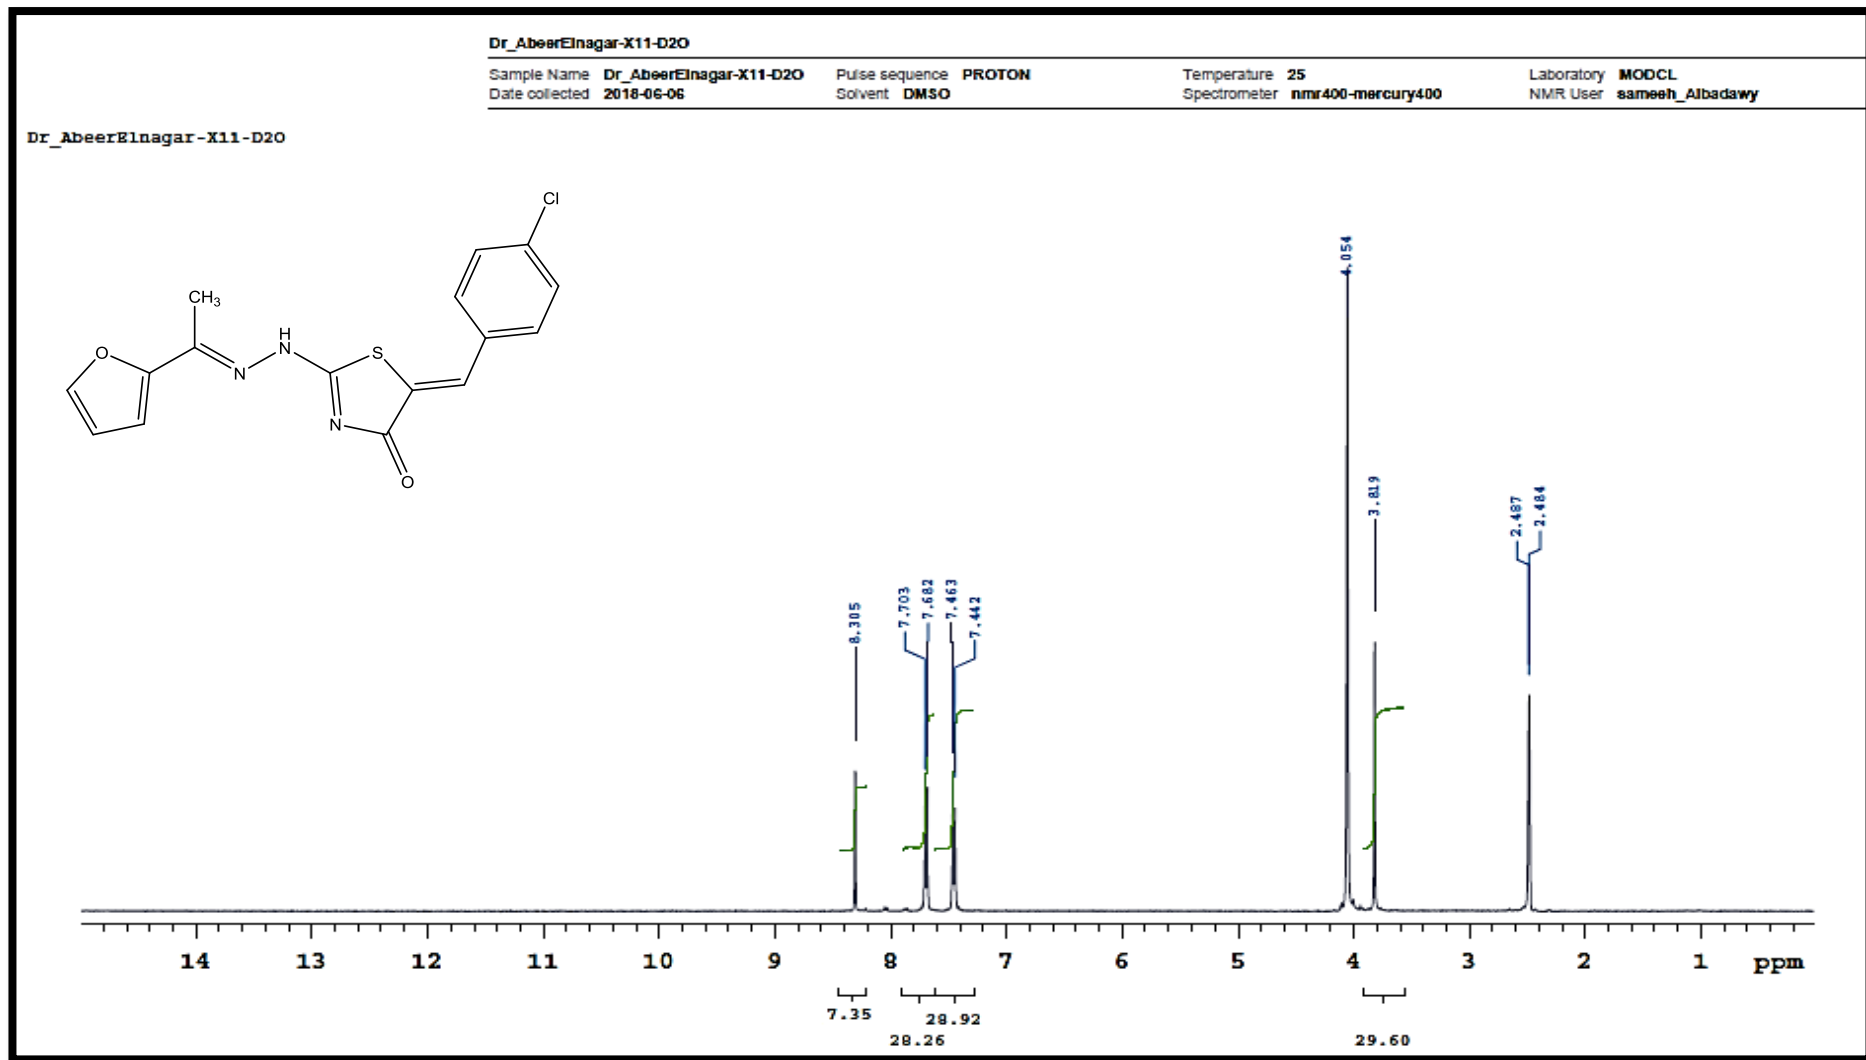

# IR of compound (8i)

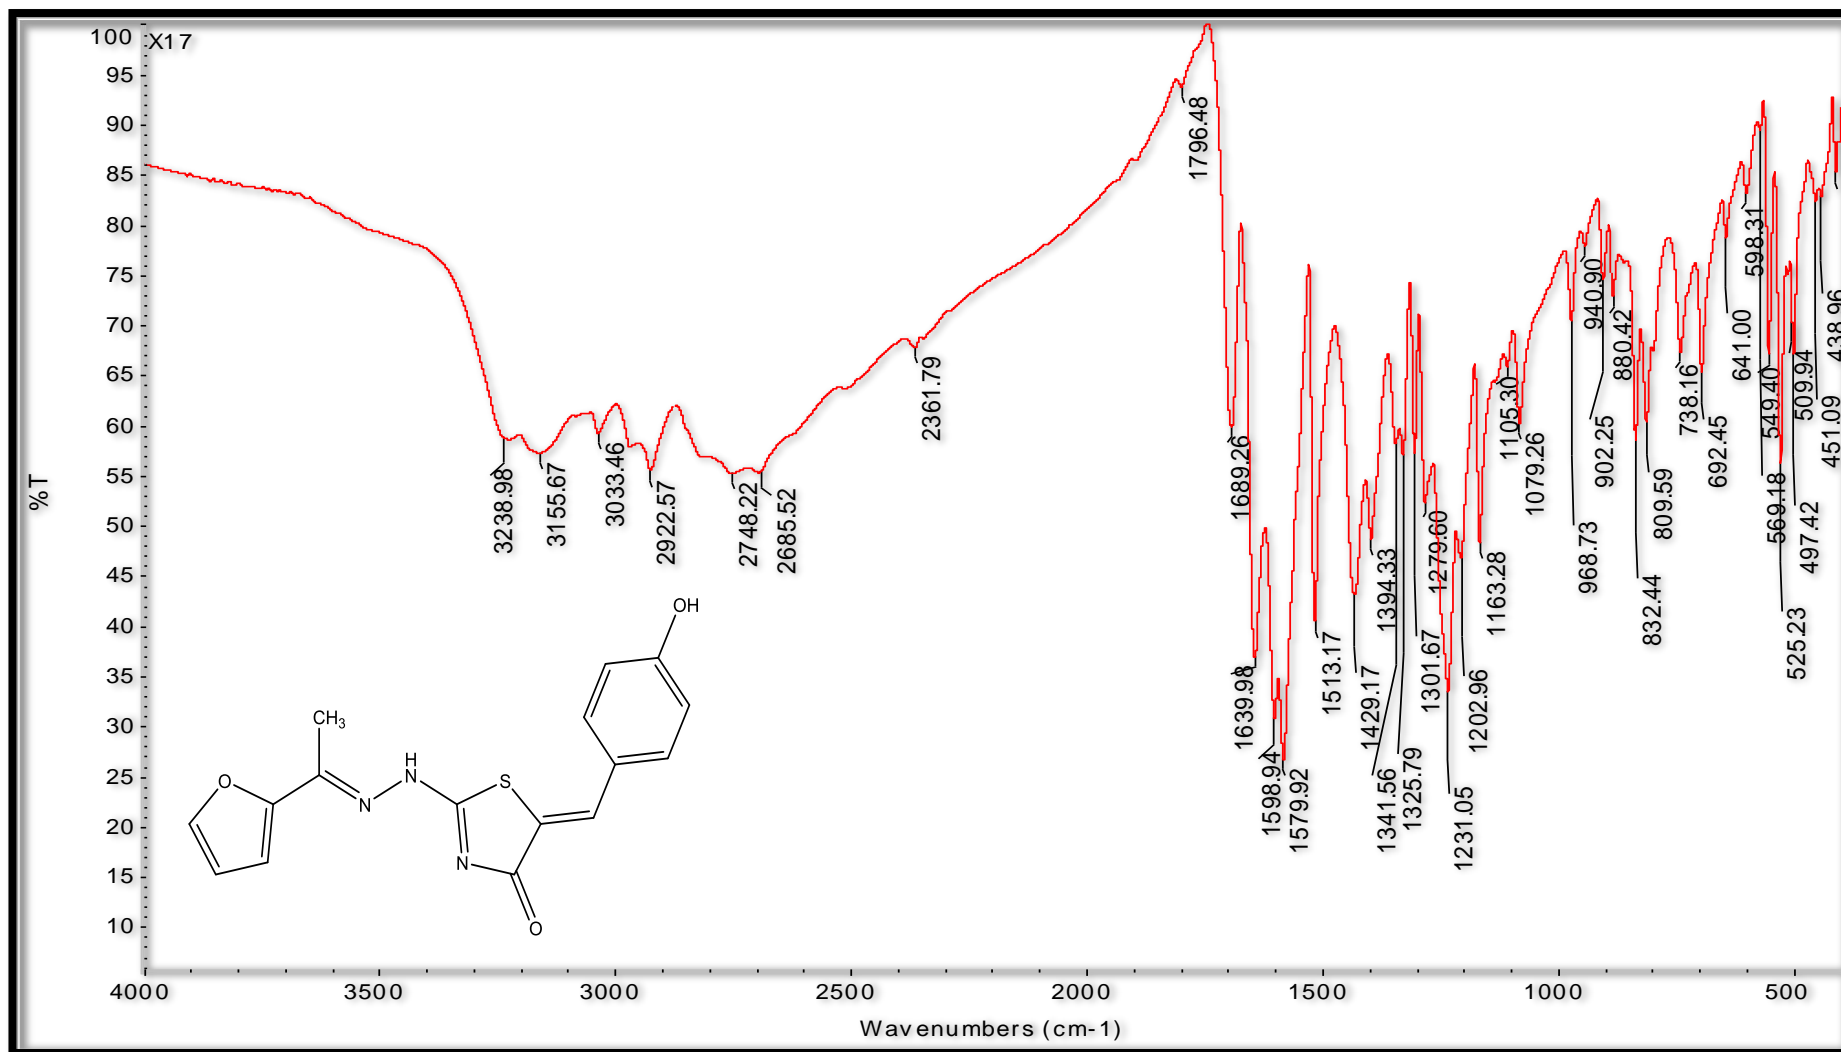

# <sup>1</sup>H NMR of compound (8i)

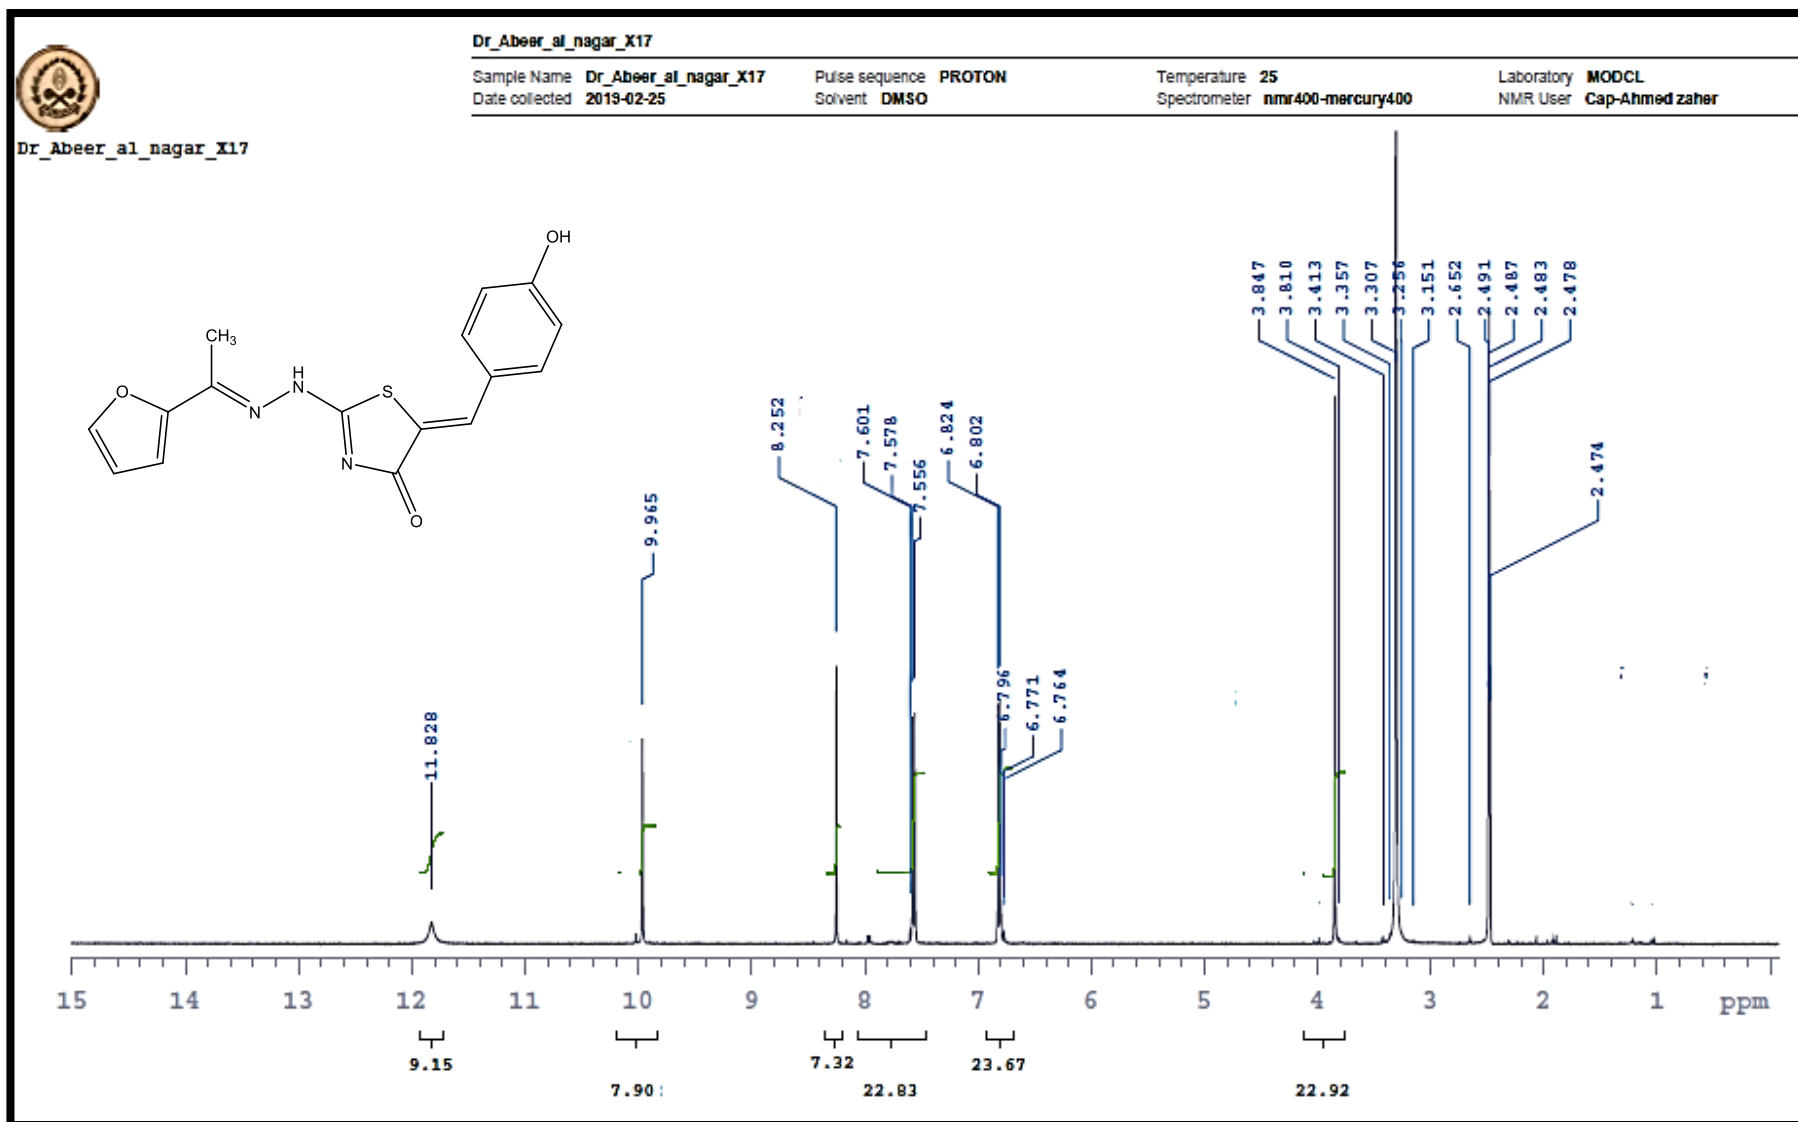

# <sup>1</sup>H NMR of compound (8i)

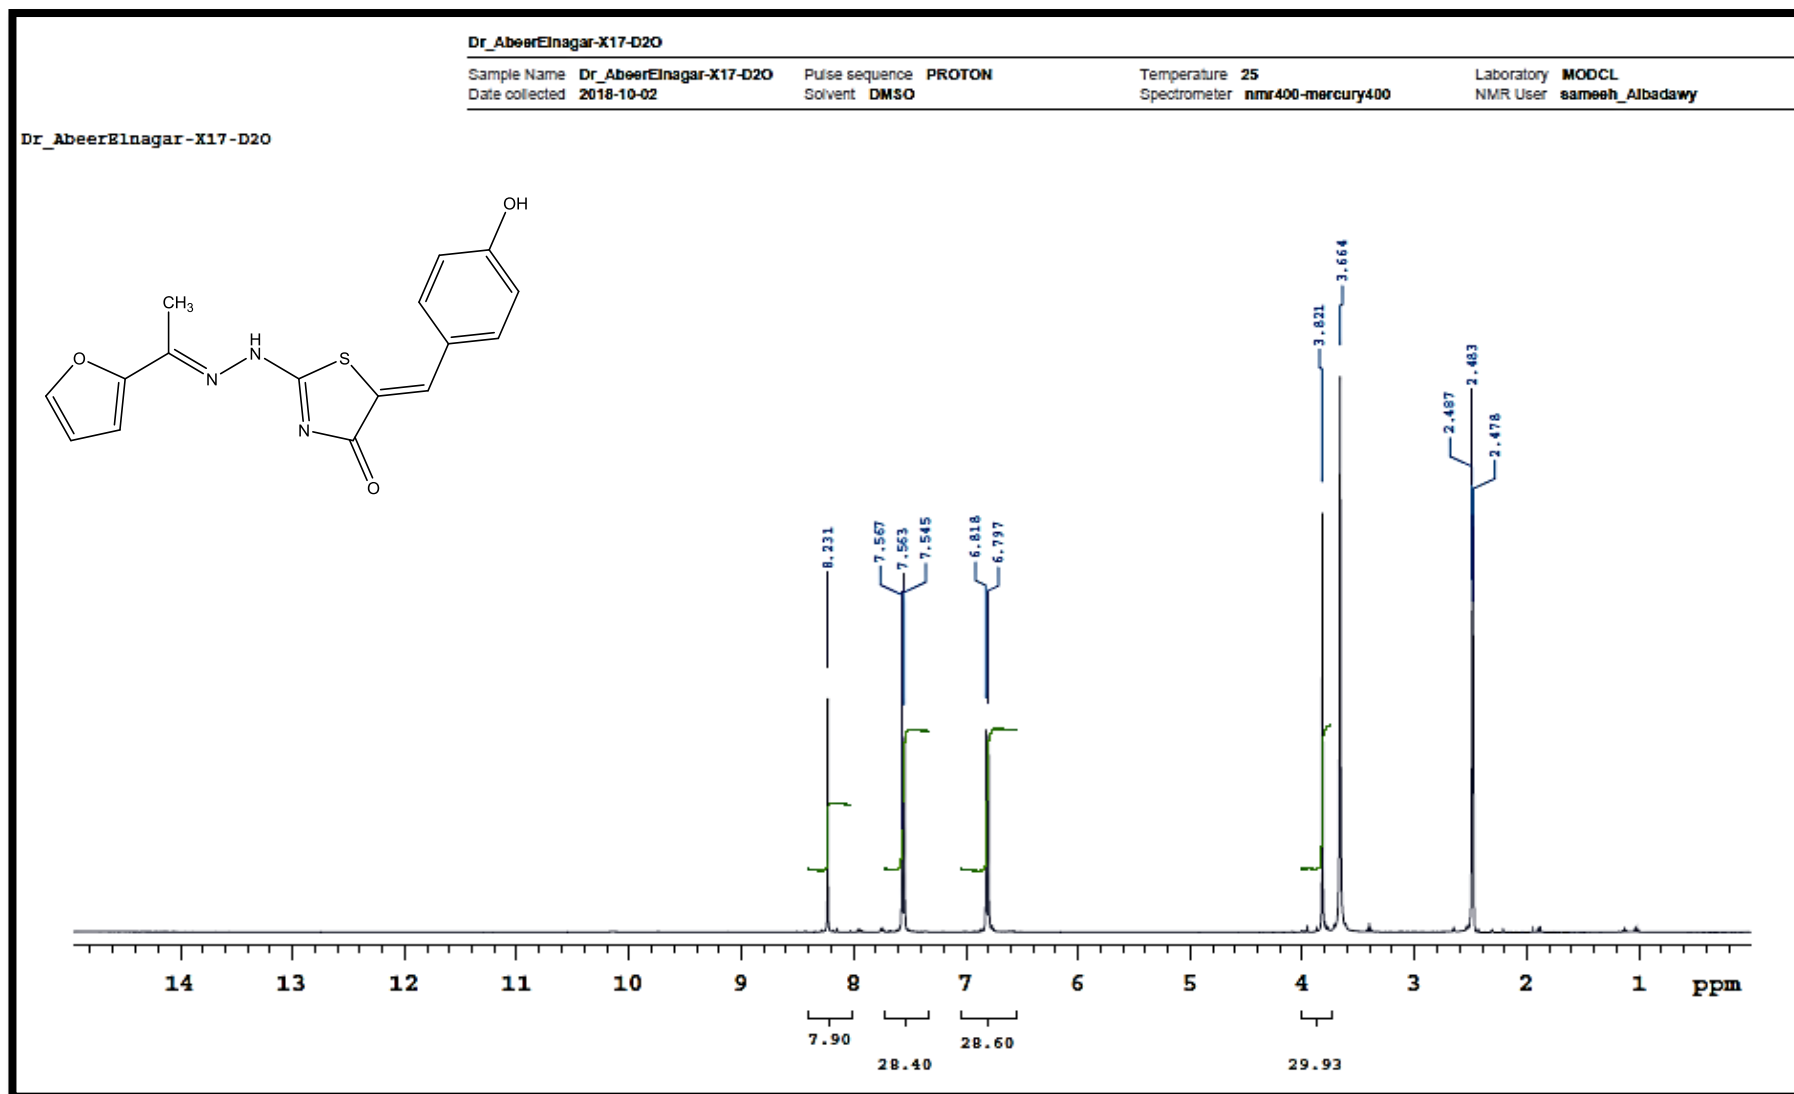



# IR of compound (8j)

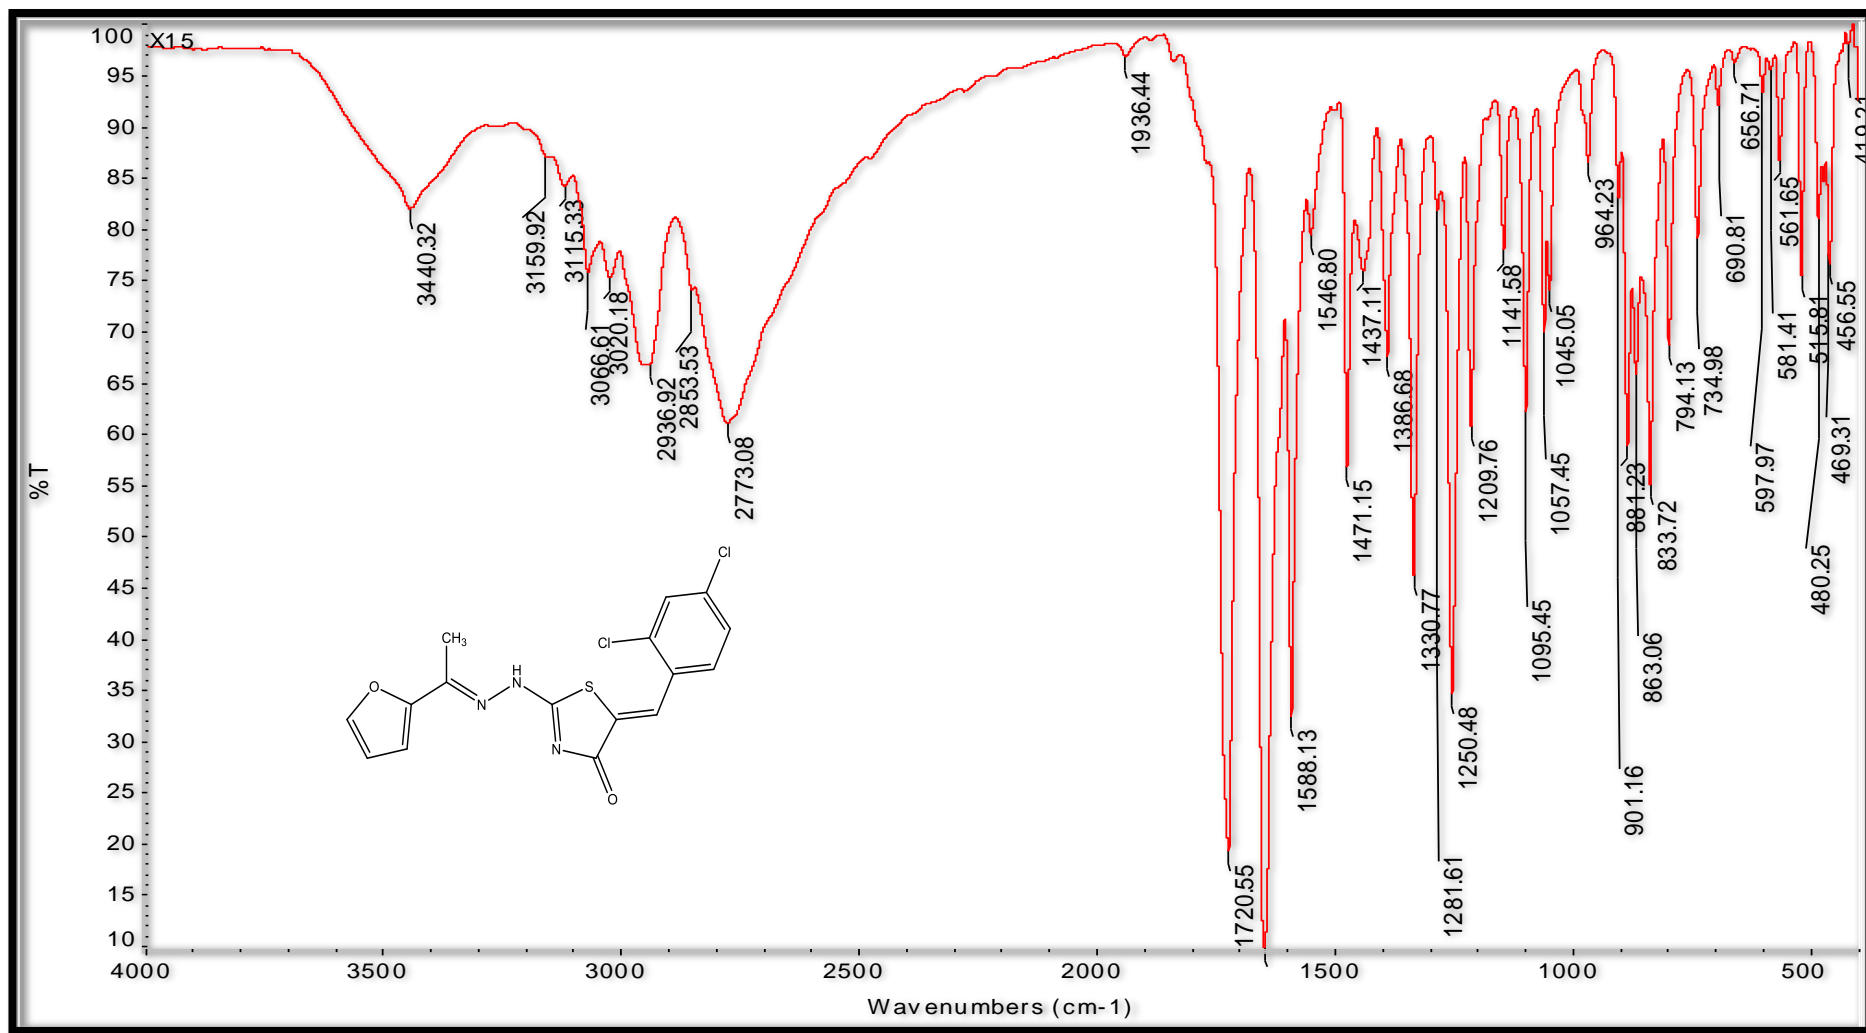

# <sup>1</sup>H NMR of compound (8j)

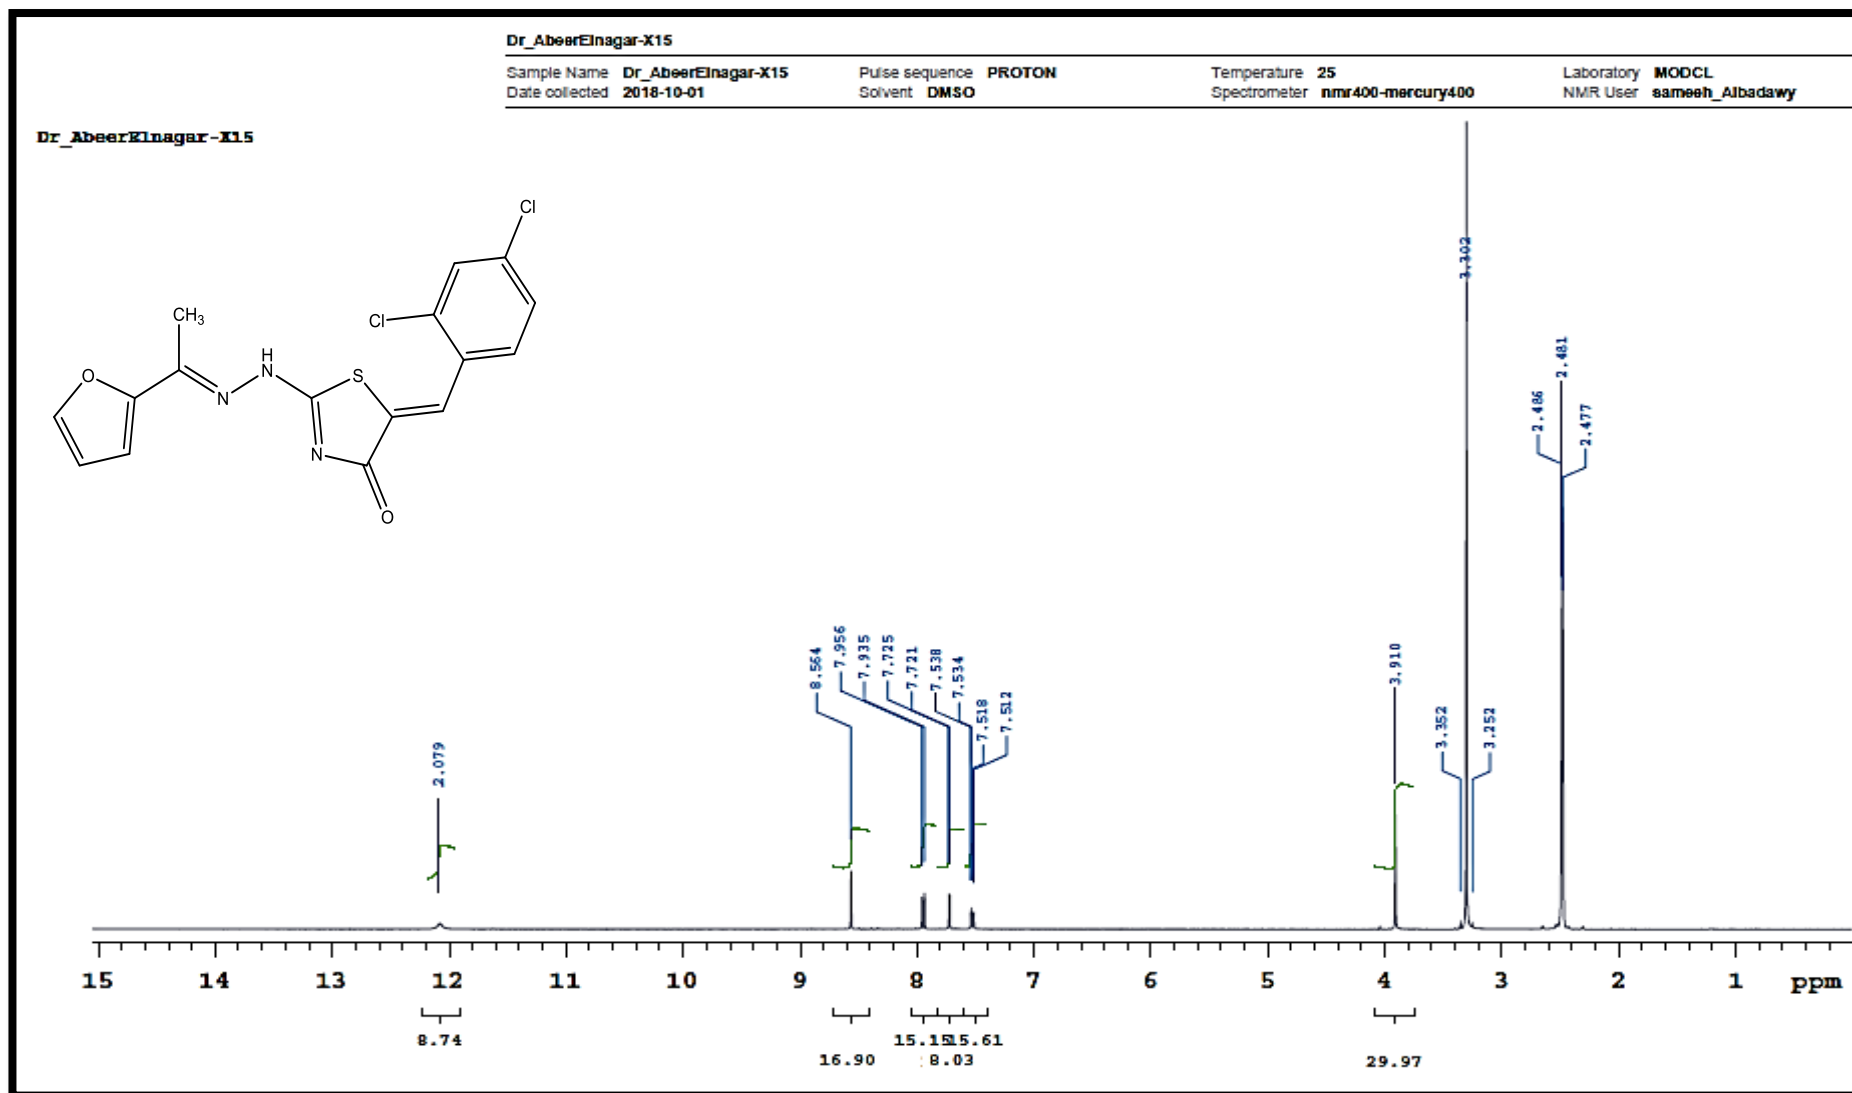

# IR of compound (8k)

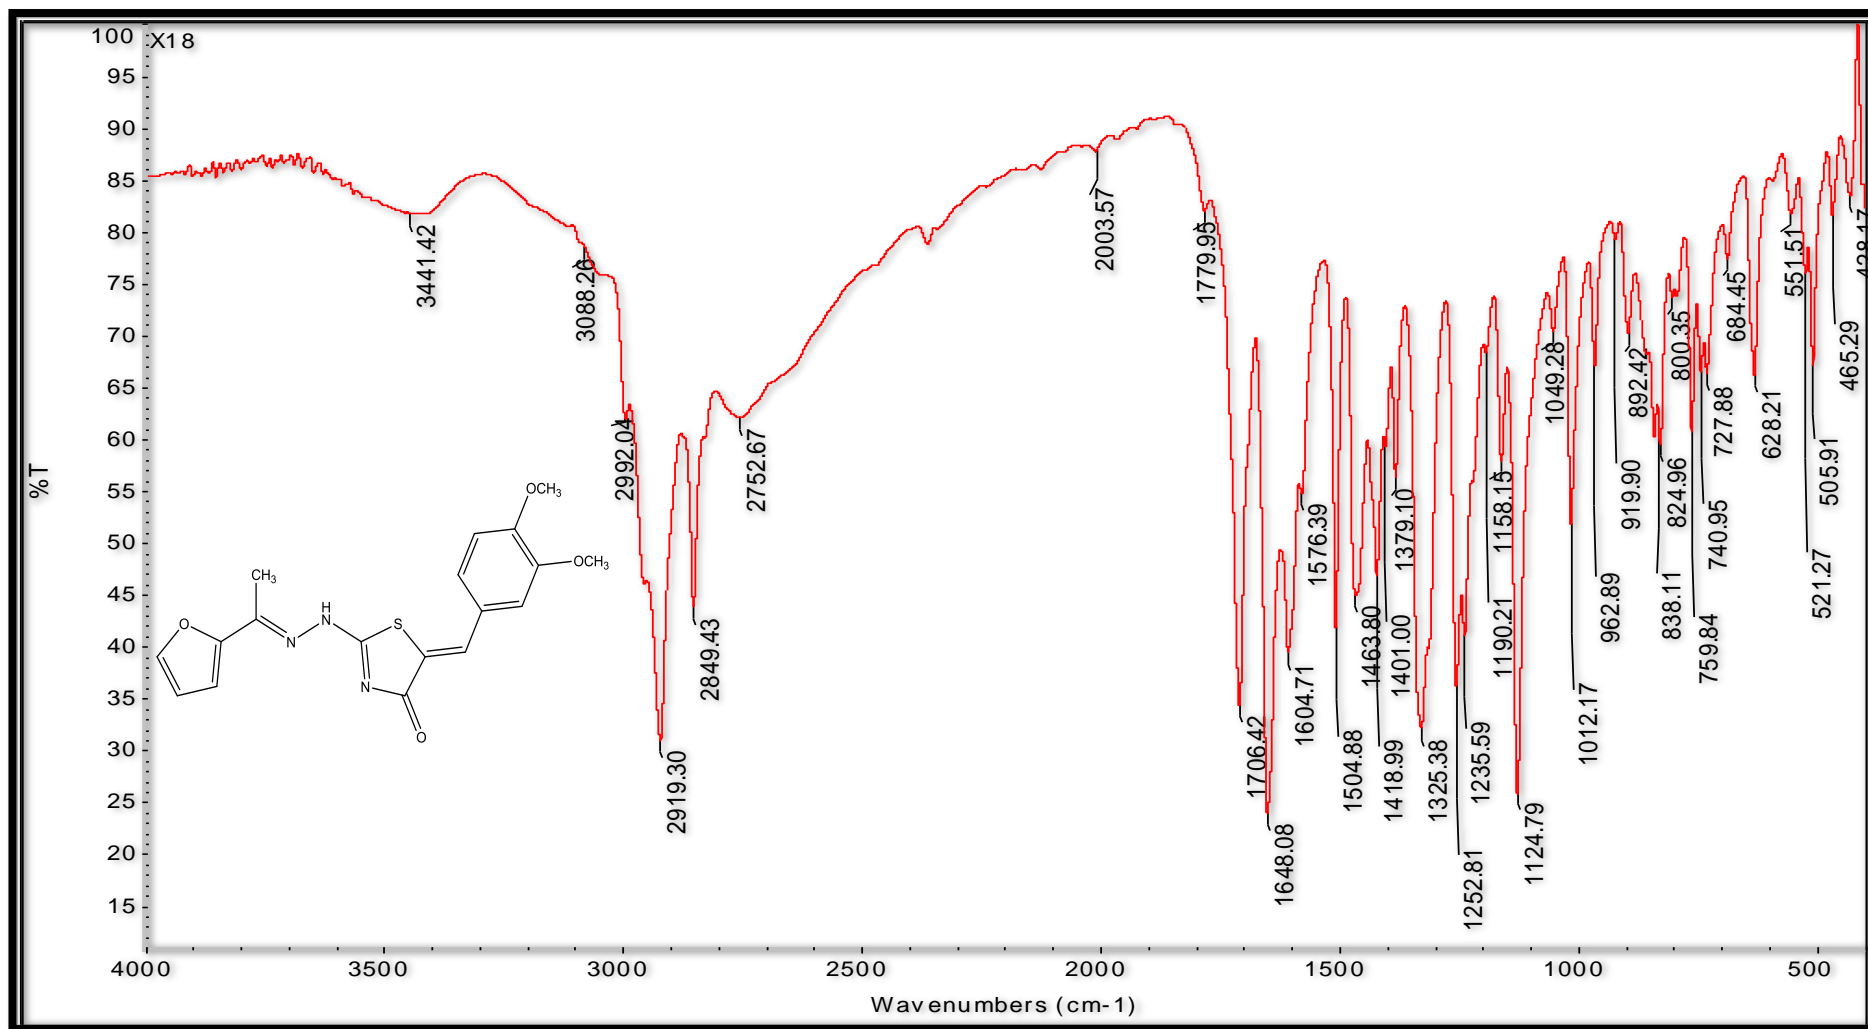

# <sup>1</sup>H NMR of compound (8k)

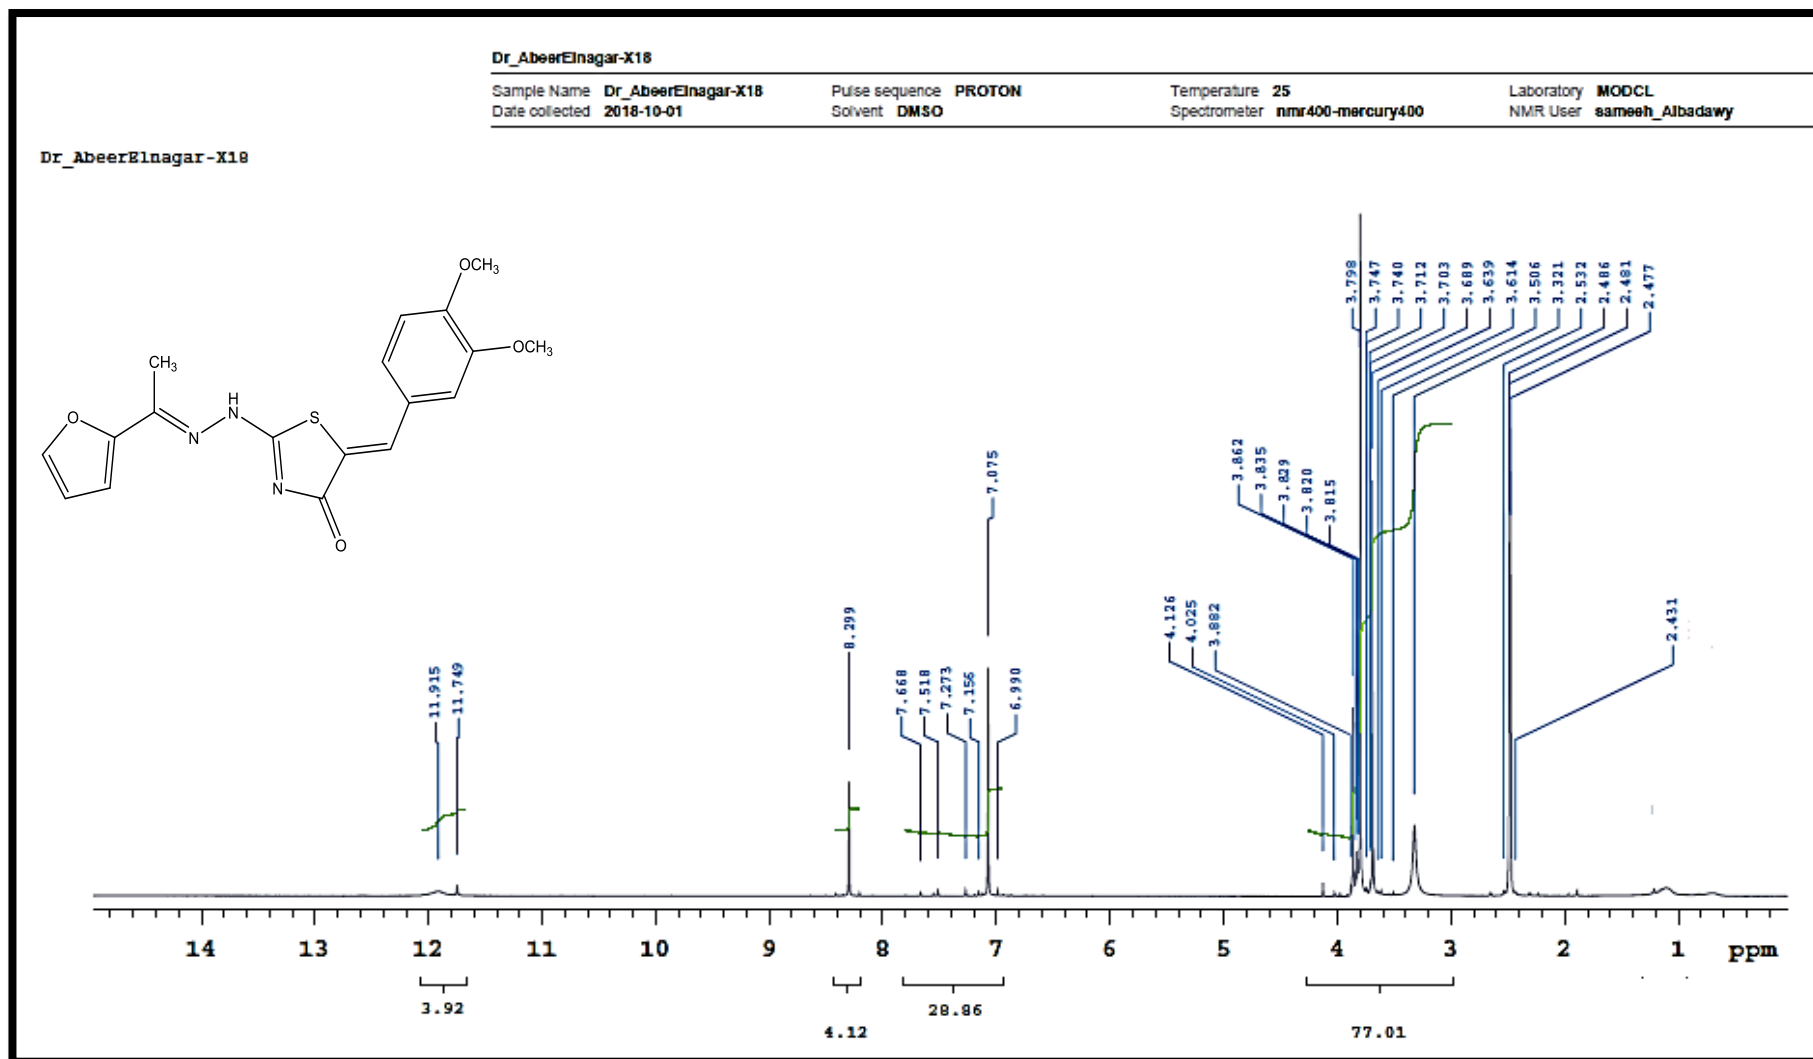

# IR of compound (8l)

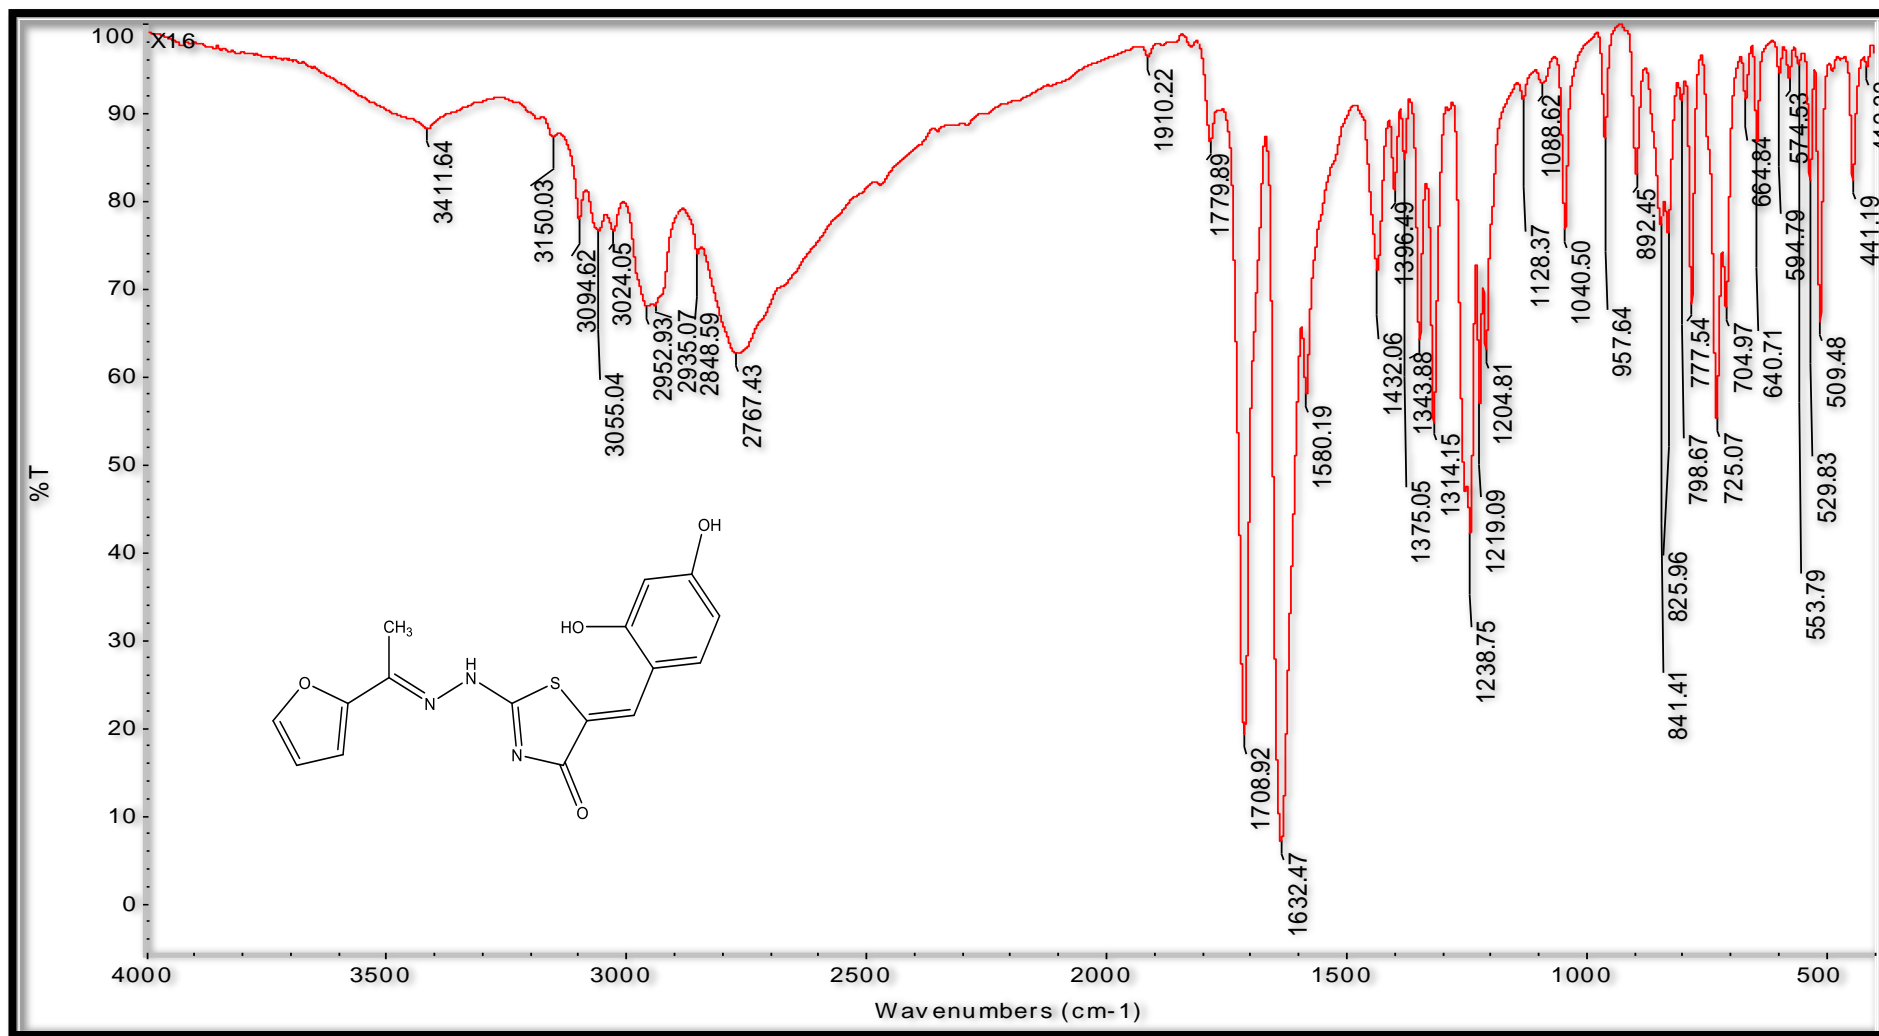

# <sup>1</sup>H NMR of compound (8I)

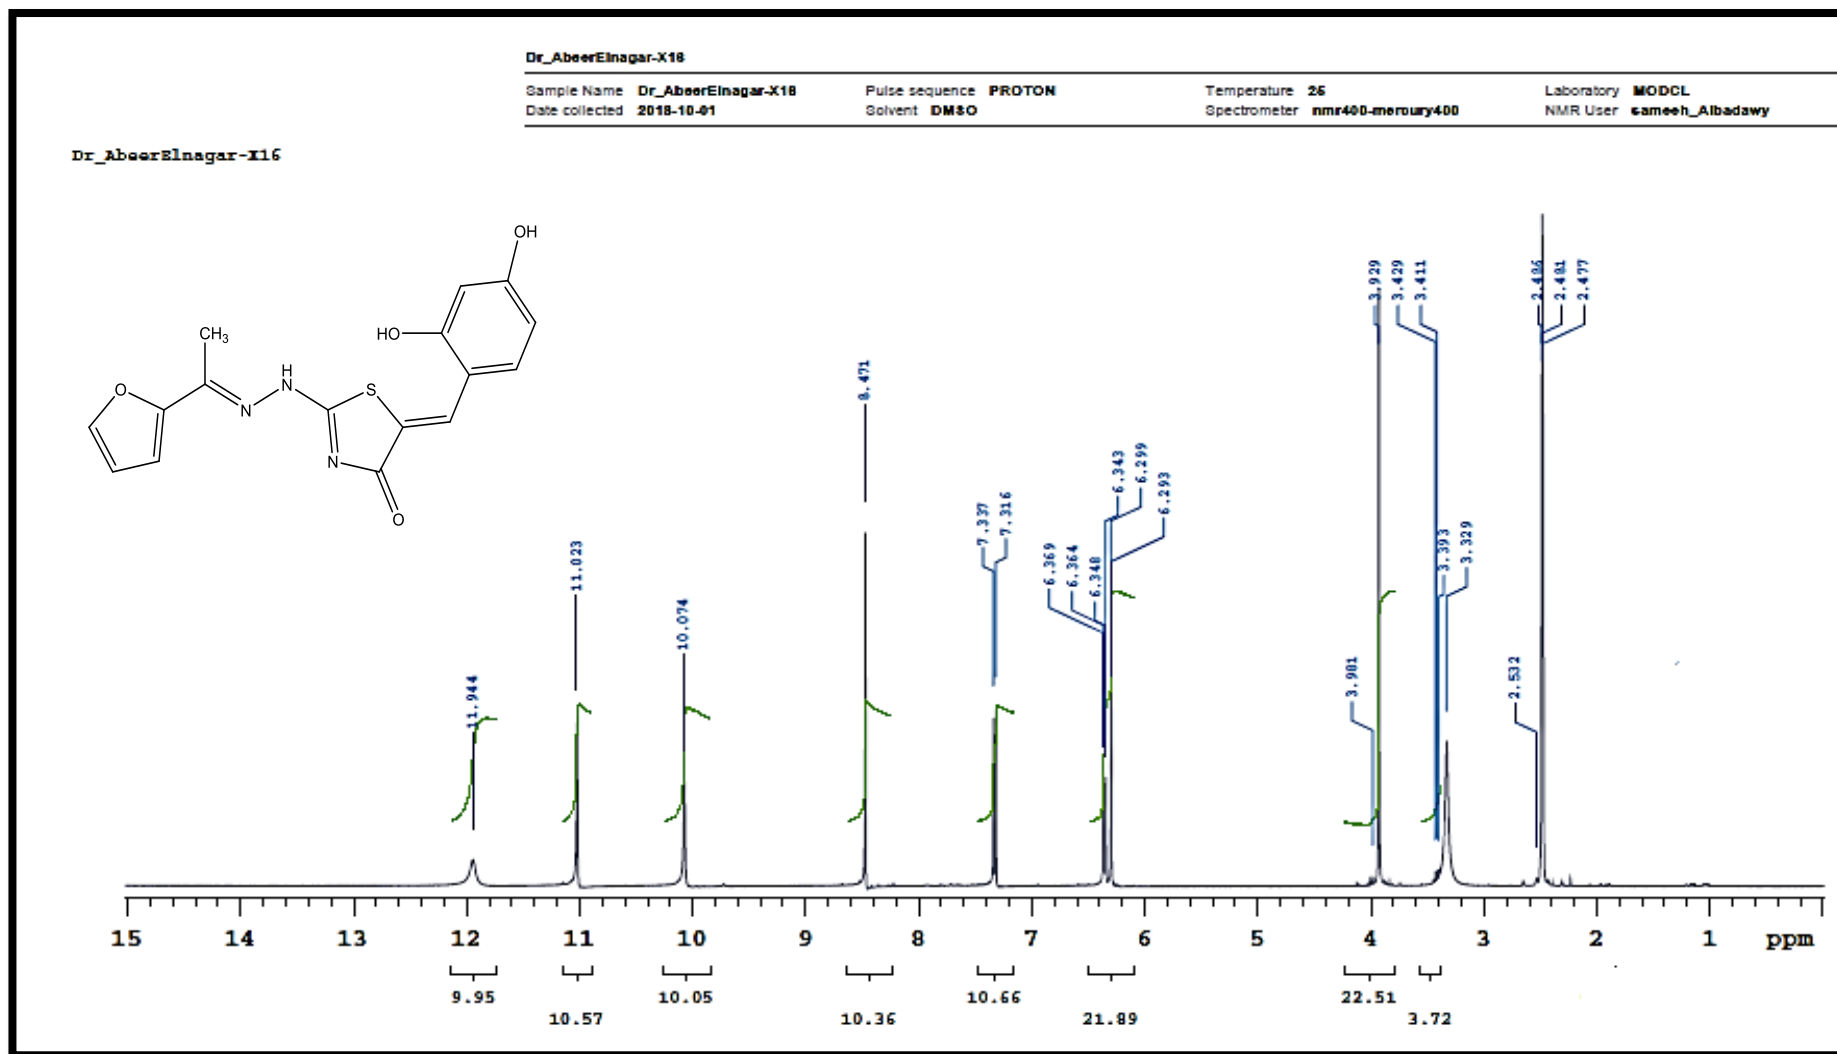

# D<sub>2</sub>O <sup>1</sup>H NMR of compound (8l)

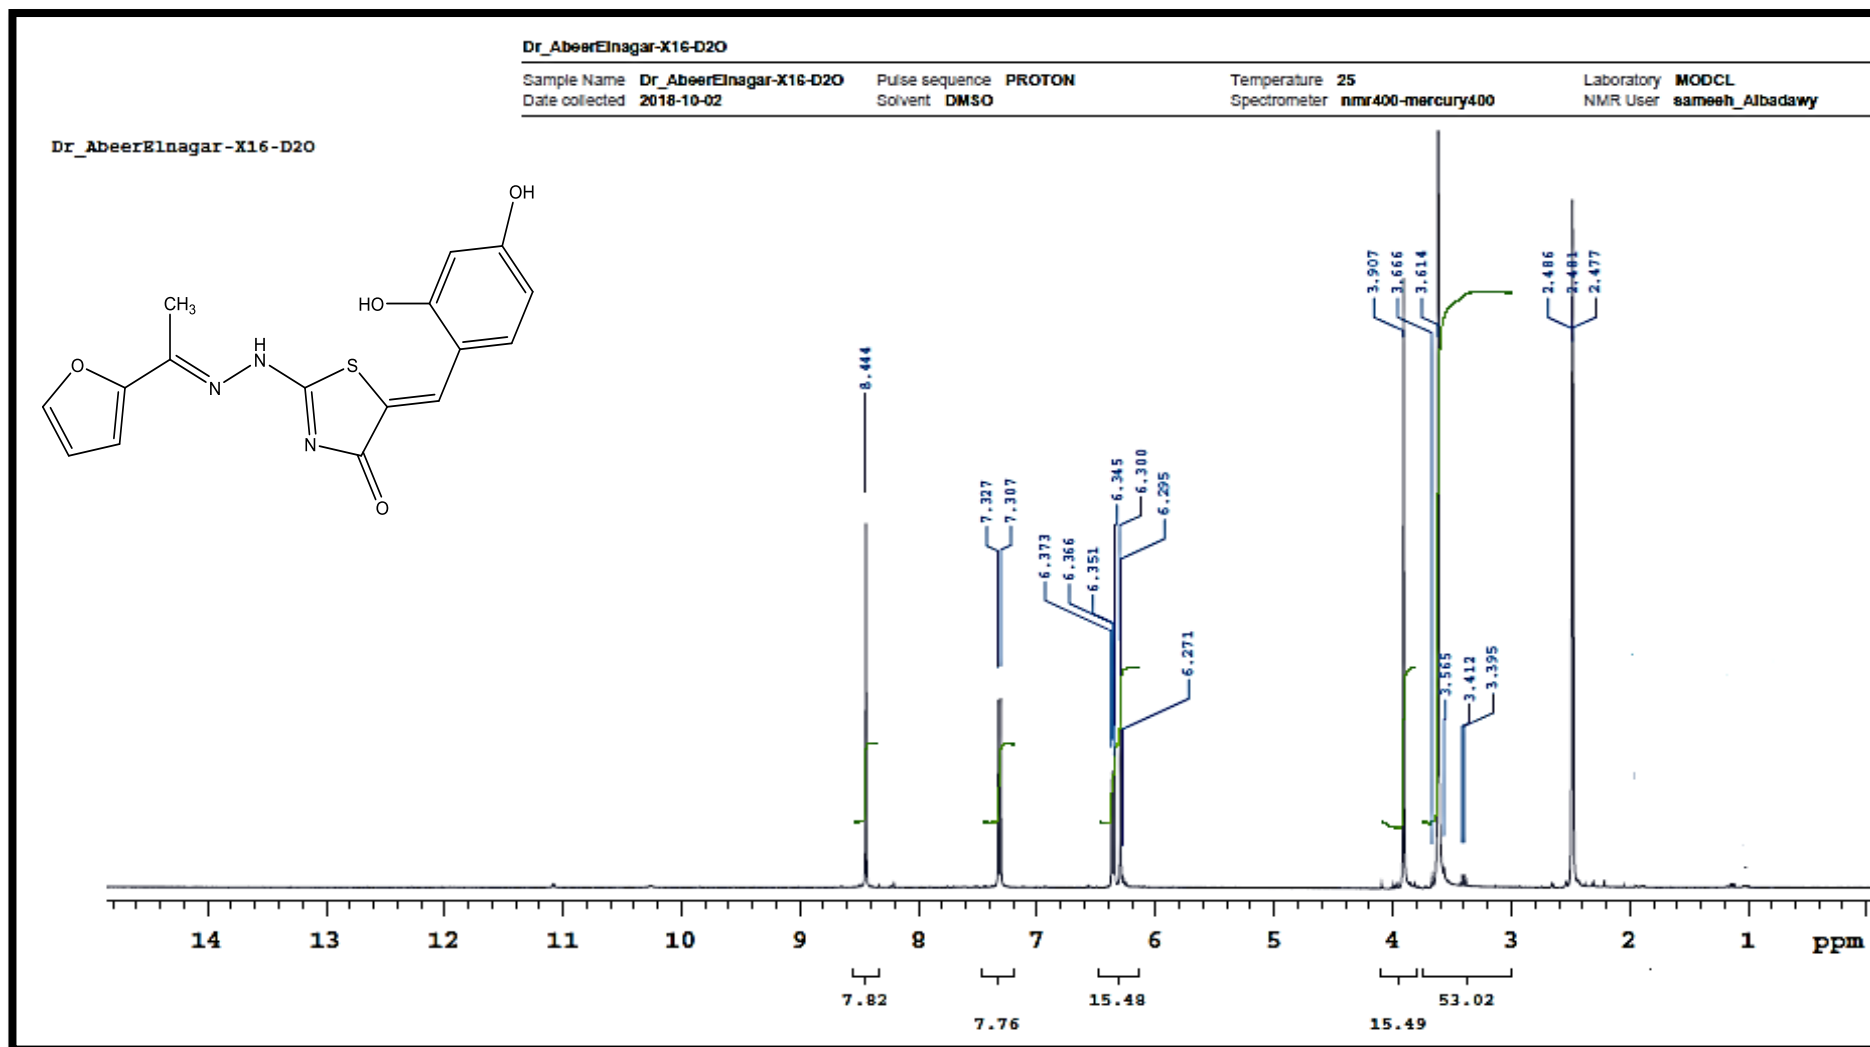

# IR of compound (9a)

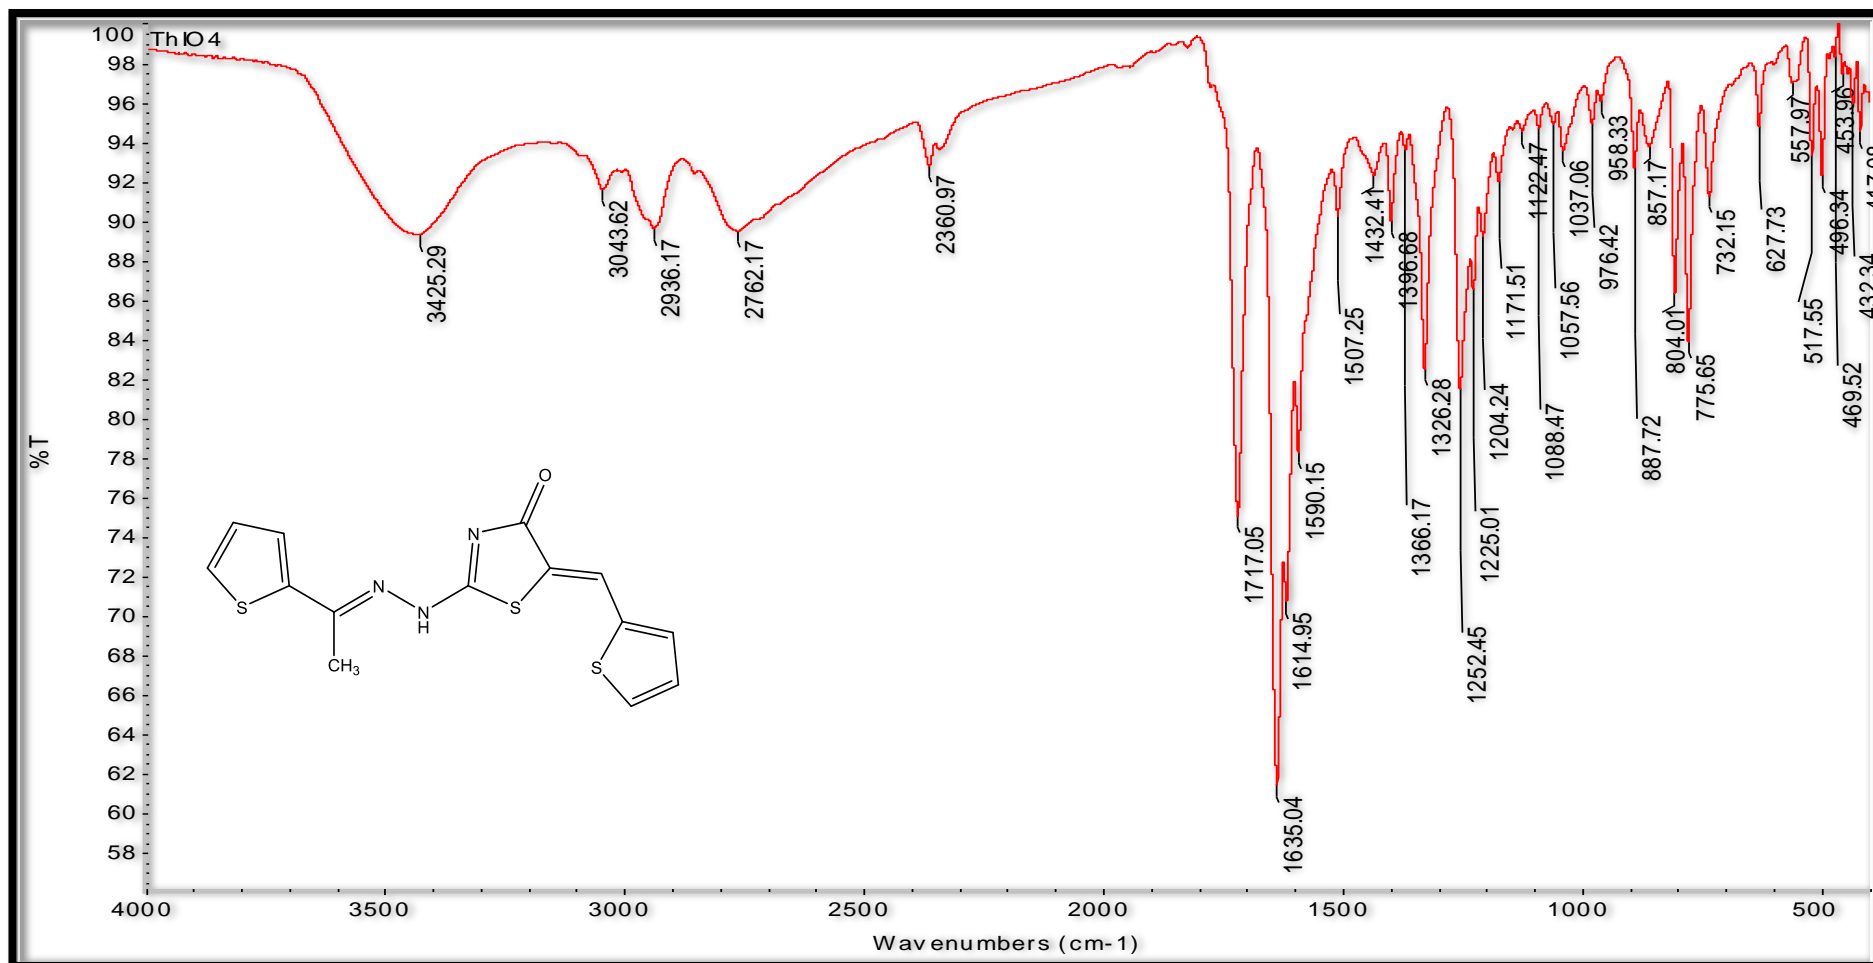



# <sup>1</sup>H NMR of compound (9a)

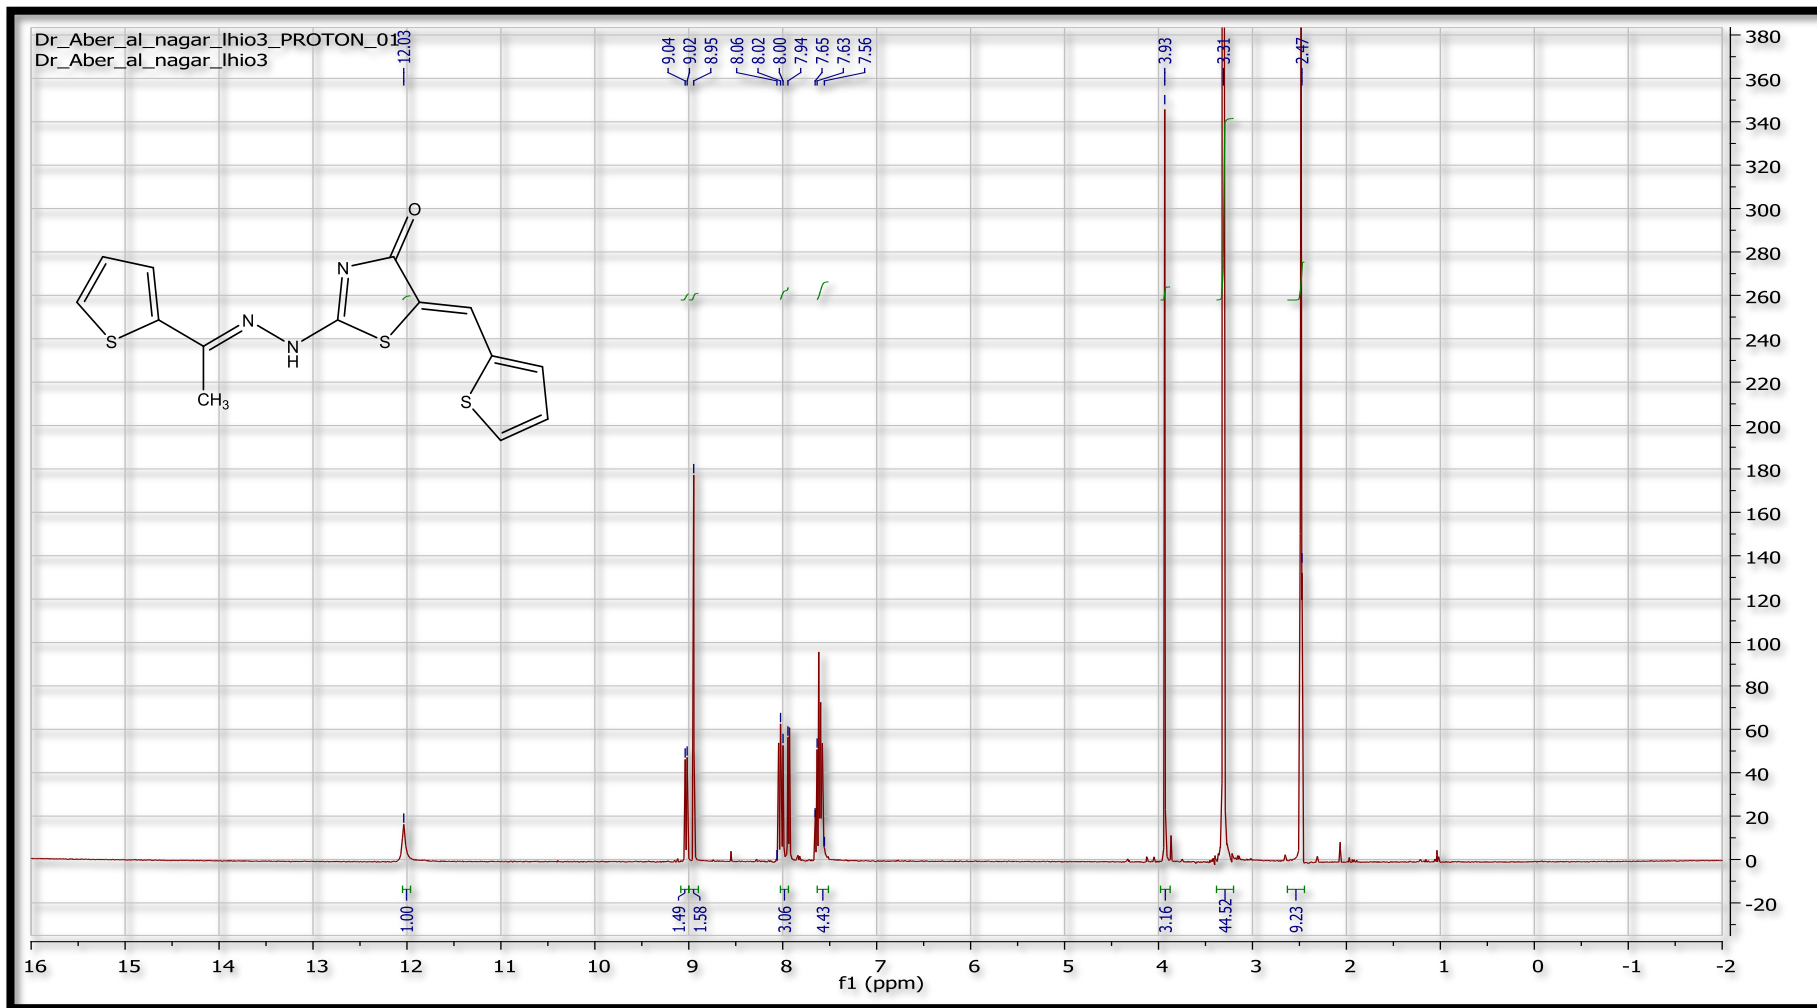

# IR of compound (9b)

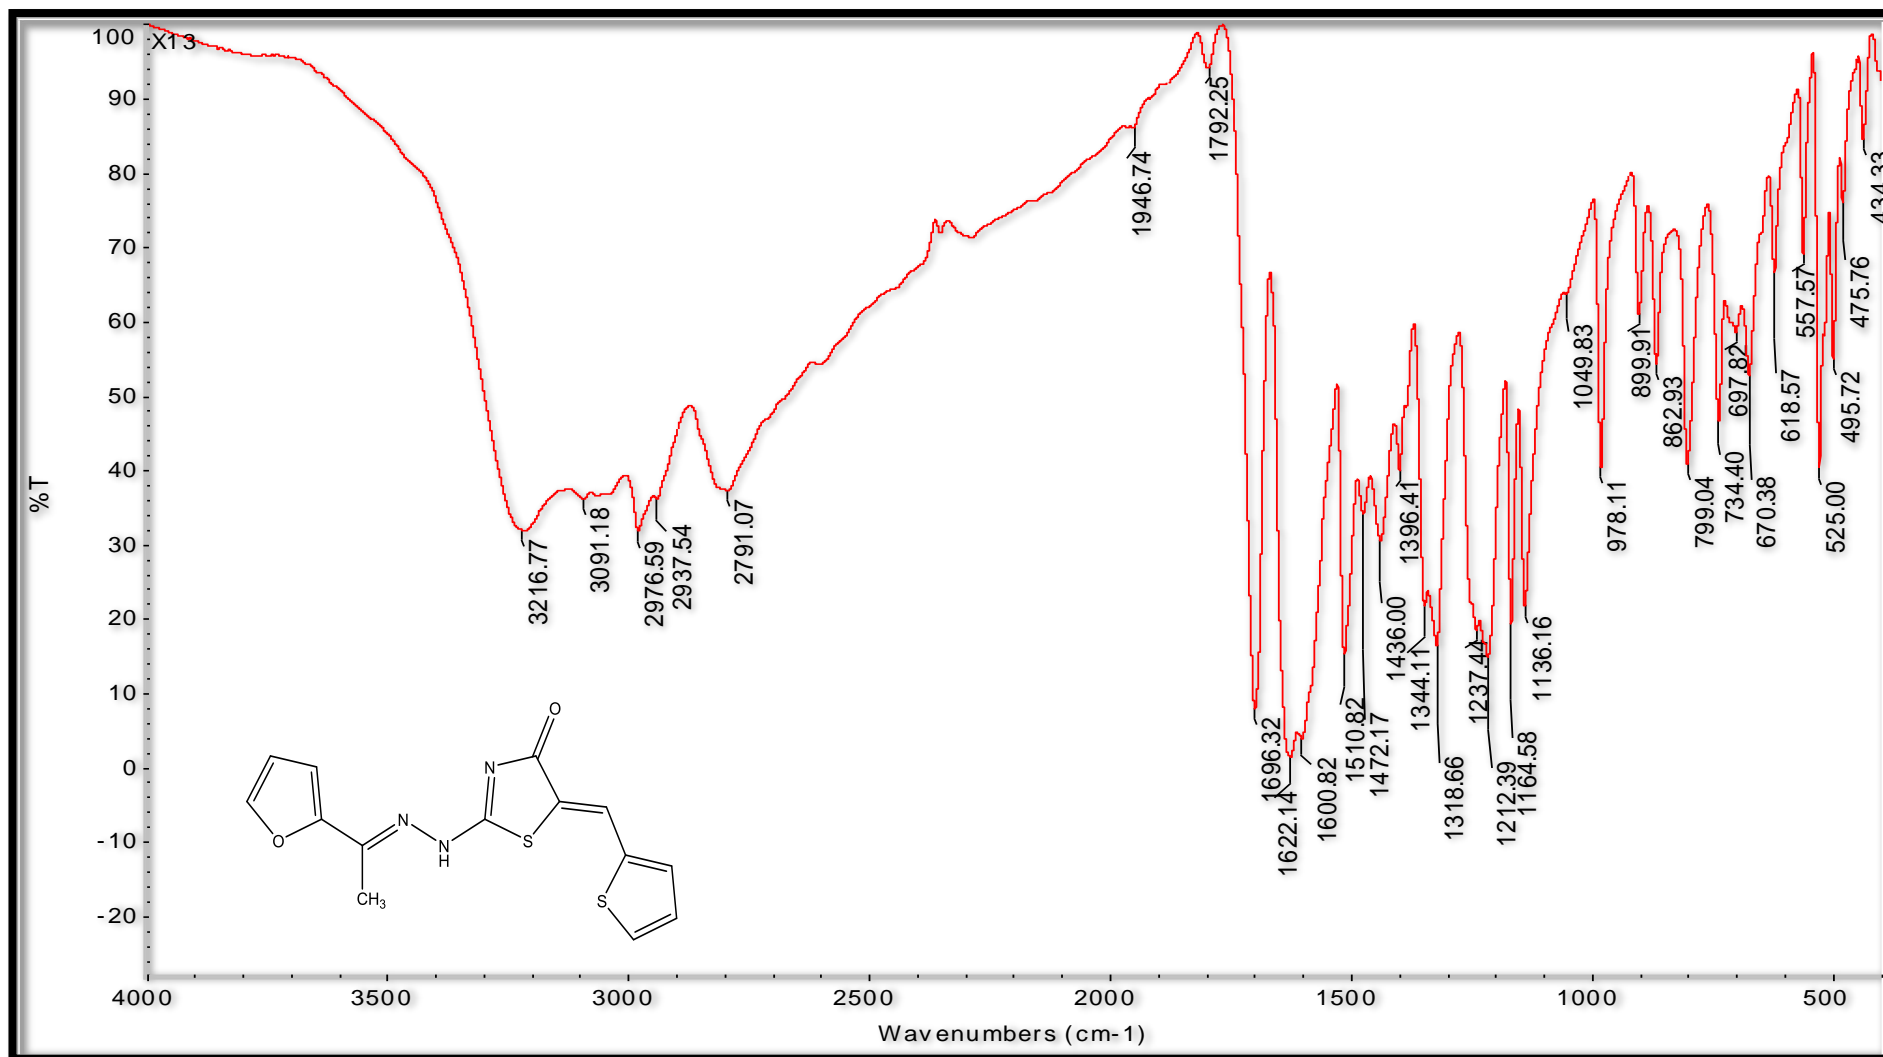

# <sup>1</sup>H NMR of compound (9b)

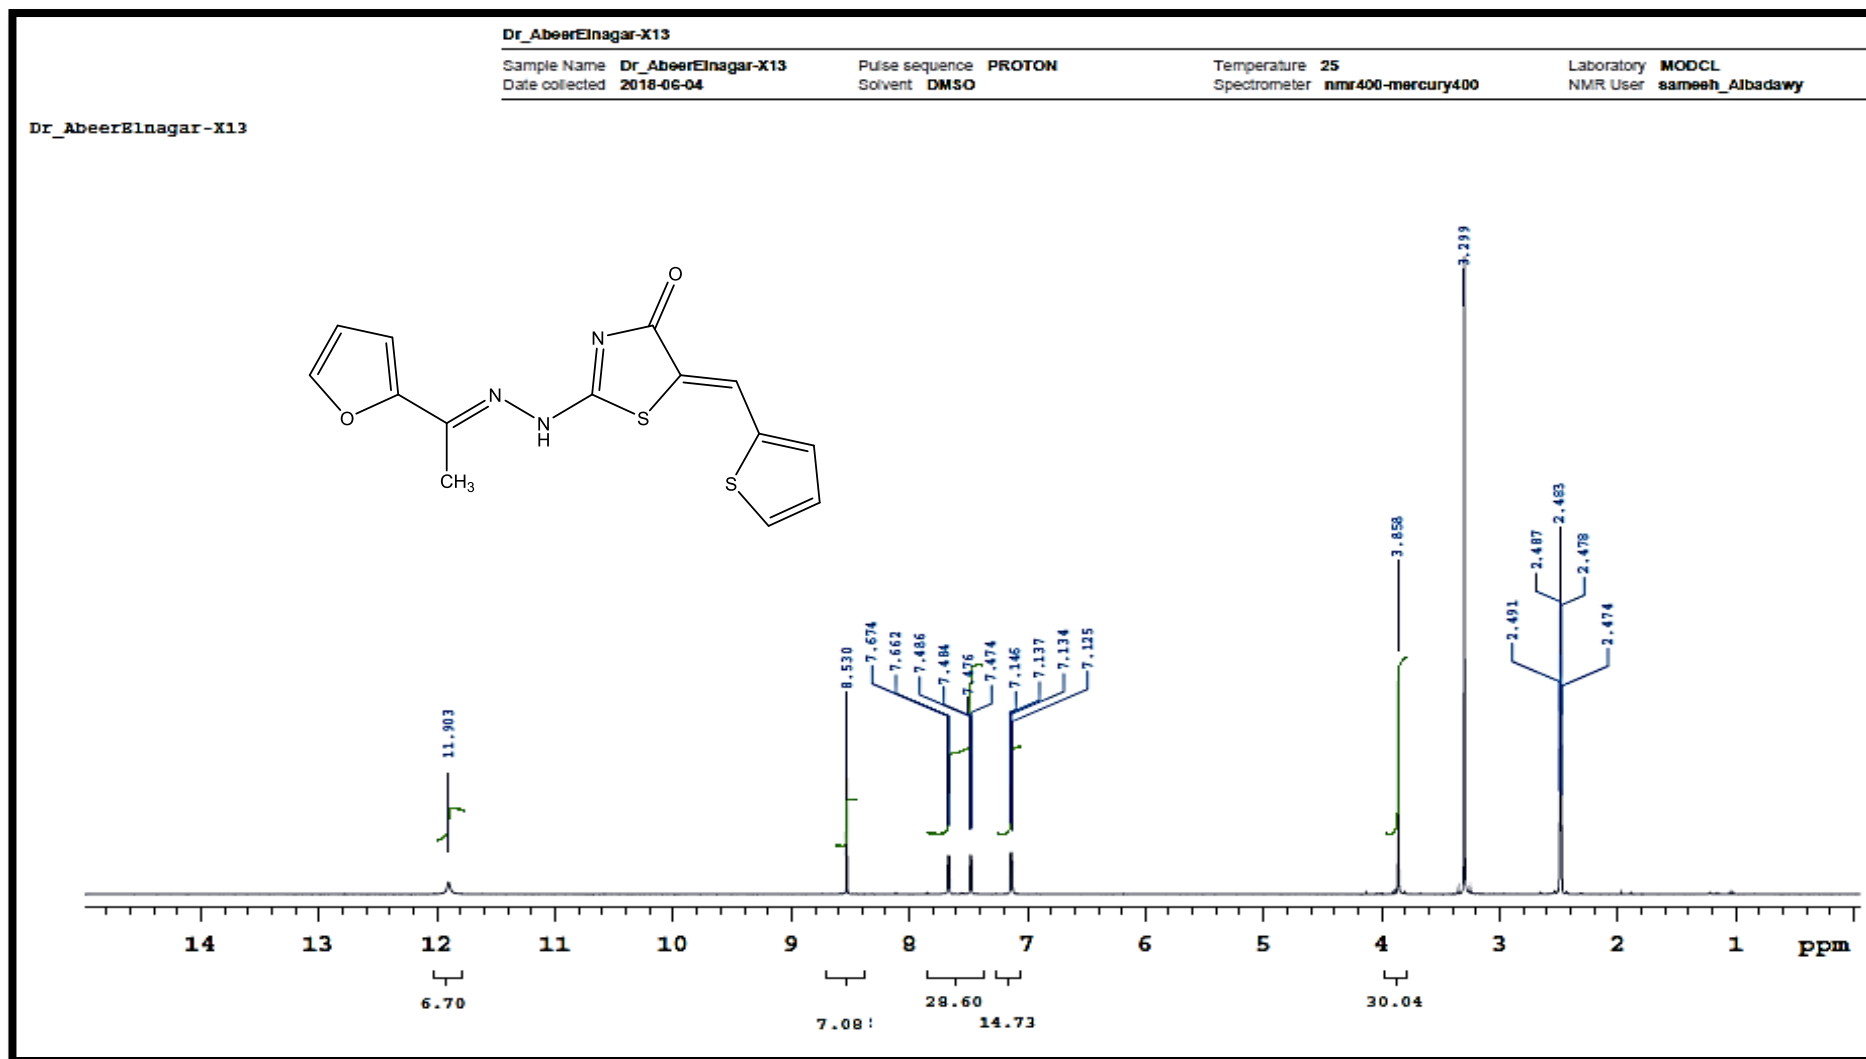

<sup>1</sup>H NMR of compound (9b)

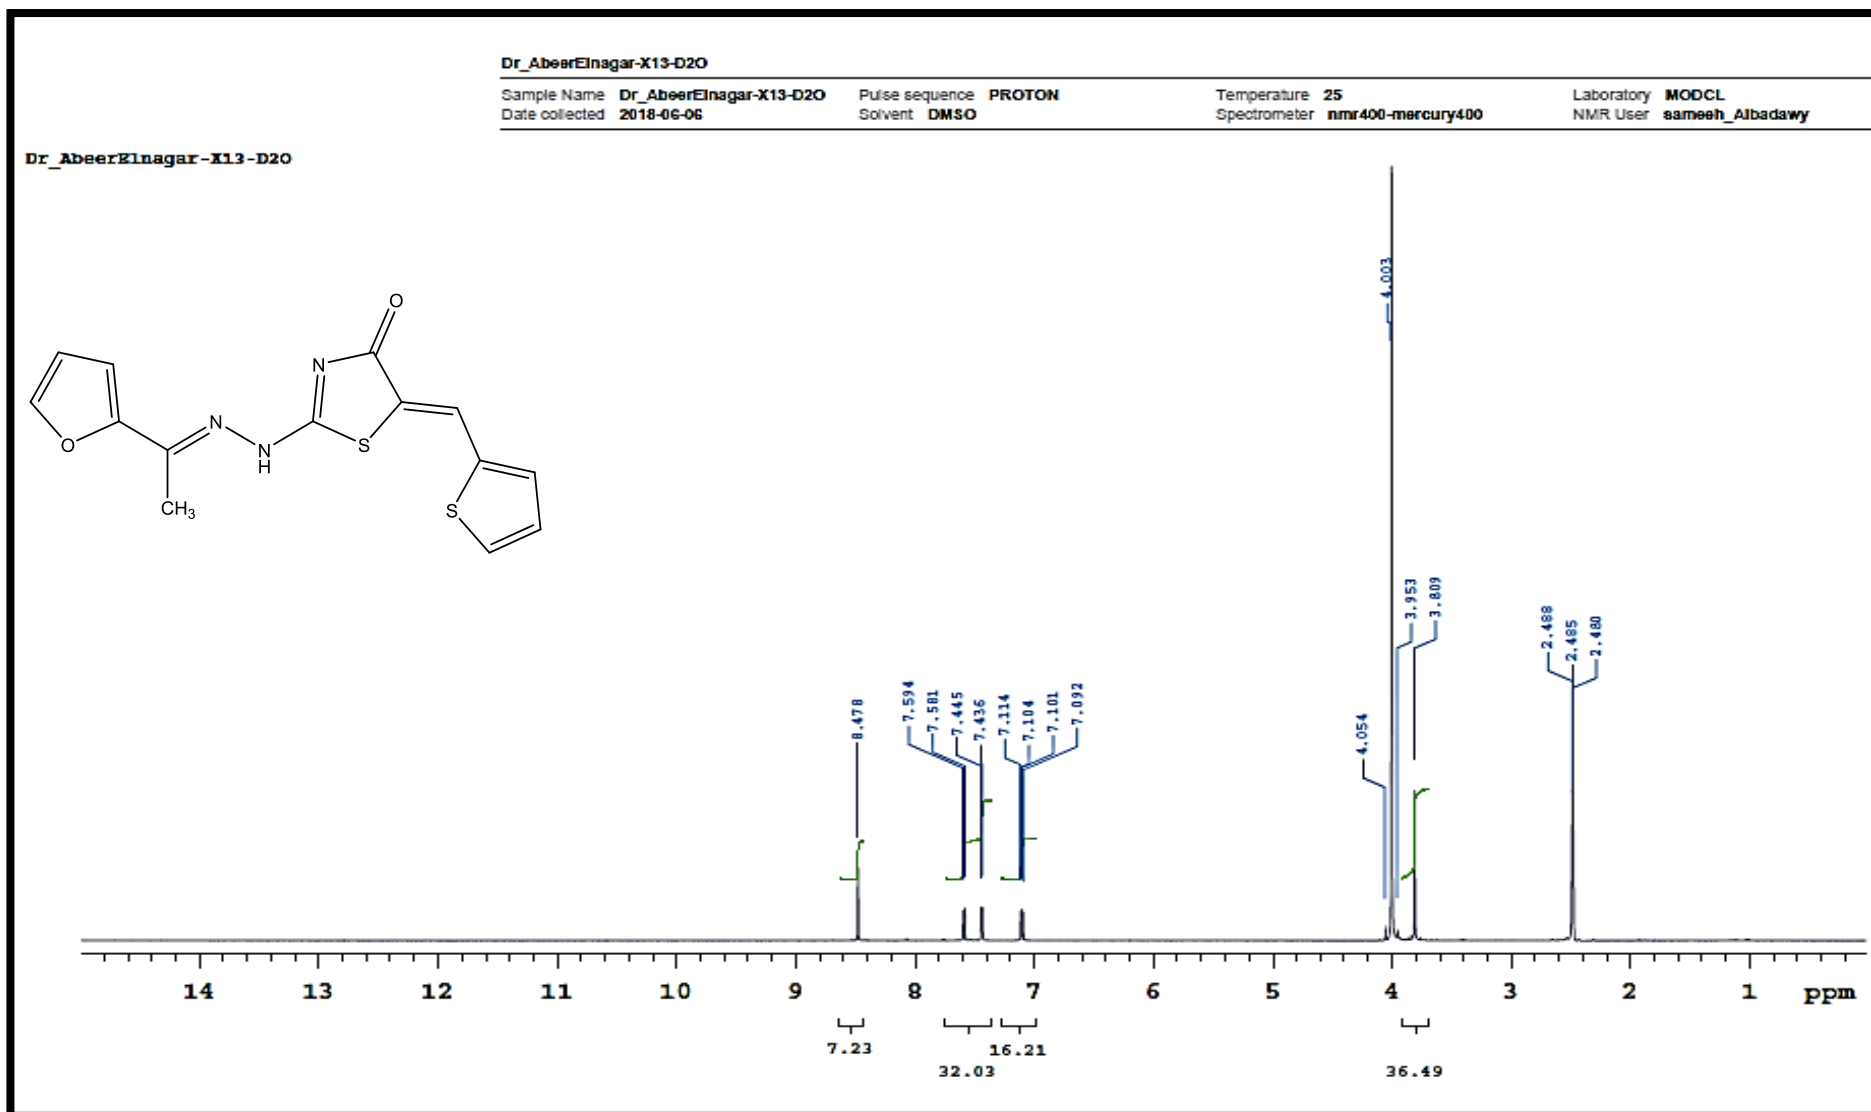

Supplement: RA-010-C9RA10094F-s001.pdf [file RA-010-C9RA10094F-s001.pdf]
